# Supplementary material for: Iron-catalyzed asymmetric Csp3–H/Csp3–H coupling: improving the chirality induction by mechanochemical liquid-assisted grinding
Source: Royal Society of Chemistry journal article supplement (doi:10.1039/d3qo01467c), 2023-11-10
Supplement: d3qo01467c1.pdf [file d3qo01467c1.pdf]

Supporting information

**Iron-Catalyzed Asymmetric  $Csp^3-H/Csp^3-H$  Coupling: Improve the Chirality Induction by Mechanochemical Liquid-Assisted Grinding**

Ping Ying,<sup>†a,b</sup> Tao Ying,<sup>†a</sup> Hong Chen,<sup>a</sup> Keyu Xiang,<sup>a</sup> Weike Su,<sup>a</sup> Haijiao Xie<sup>c</sup> and Jingbo Yu<sup>\*a</sup>

<sup>a</sup> Key Laboratory of Pharmaceutical Engineering of Zhejiang Province, Key Laboratory for Green Pharmaceutical Technologies and Related Equipment of Ministry of Education, Collaborative Innovation Center of Yangtze River Delta Region Green Pharmaceuticals, Zhejiang University of Technology, Hangzhou 310014, P.R. China. E-mail: yjb@zjut.edu.cn

<sup>b</sup> College of Ecology, Lishui University, Lishui, 323000, P.R. China

<sup>c</sup> Hangzhou Yanqu Information Technology Co., Ltd.

Y2, 2nd Floor, Building 2, Xixi Legu Creative Pioneering Park, No. 712 Wen'er West Road, Xihu District, Hangzhou, Zhejiang Province, 310003, P.R.O.C.

## Table of Contents

|                                                                                              |     |
|----------------------------------------------------------------------------------------------|-----|
| 1. General information .....                                                                 | S3  |
| 2. General procedures for the synthesis of ligands .....                                     | S3  |
| 2.1 The synthesis of L13 .....                                                               | S3  |
| 2.2 Typical synthesis of L9 and L14-L16 .....                                                | S3  |
| 3. Reaction optimization & typical procedures .....                                          | S4  |
| 3.1 Optimization of the reaction conditions .....                                            | S4  |
| 3.2 Typical procedures for LAG induced asymmetric CDC reaction .....                         | S7  |
| 3.3 Typical procedures for asymmetric CDC reaction under accelerating aging conditions ..... | S7  |
| 3.4 Typical procedure for the preparation of racemic products .....                          | S7  |
| 3.5 Comparative experiments under solution-based conditions .....                            | S8  |
| 3.6 Comparative experiment under neat stirring conditions .....                              | S8  |
| 4. Mechanism study .....                                                                     | S9  |
| 4.1 Control experiments .....                                                                | S9  |
| 4.2 Radical trapping experiments .....                                                       | S9  |
| 4.3 Iron-complexes capturing experiments .....                                               | S9  |
| 5. Crystal data for 3aa (minor diastereomers) .....                                          | S11 |
| 6. Green chemistry metrics evaluation .....                                                  | S12 |
| 7. Characterization data (HPLC spectra) .....                                                | S14 |
| 7.1 Ligands .....                                                                            | S14 |
| 7.2 Radical trapping product .....                                                           | S15 |
| 7.3 Products .....                                                                           | S16 |
| 8. NMR spectra .....                                                                         | S38 |
| 8.1 Ligands .....                                                                            | S38 |
| 8.2 Radical trapping product .....                                                           | S43 |
| 8.3 Products .....                                                                           | S44 |
| 9. DFT Computations .....                                                                    | S68 |
| 9.1 Computational details .....                                                              | S68 |
| 9.2 Cartesian Coordinates .....                                                              | S68 |
| 10. References .....                                                                         | S91 |

## 1. General information

Unless otherwise stated, all reagents involving **L1-L8** and **L10-L12** were purchased from commercial suppliers and used without further purification.  $\beta$ -keto esters (**1**) were prepared according to the literature methods<sup>1-3</sup> (ref 1 for **1a-1e** and **1g**, ref 2 for **1f**, ref 3 for **1h-1m**). Glycine esters (**2**) were prepared according to the literature procedure<sup>4</sup>. All of the ball milling reactions were conducted in a Mixer mill (MM 400 RetschGmbH, Hann, Germany) with 25 mL stainless-steel vessels (equipped with gas inlet and outlet valve) with stainless-steel balls, if not mentioned otherwise. Reactions were monitored by Thin Layer Chromatography (TLC) using UV light (254 nm) for detection. <sup>1</sup>H, <sup>13</sup>C and <sup>19</sup>F NMR spectra were recorded on Bruker 400, 500 or 600 MHz spectrometer in CDCl<sub>3</sub> with tetramethylsilane (TMS) as internal standard. Chemical shifts are reported in parts per million (ppm). The following abbreviations were used to explain multiplicities: s = singlet, brs = broad singlet, d = doublet, t = triplet, q = quadruplet, m = multiplet and the coupling constants (*J*) were reported in Hertz unit (Hz). Melting points were measured using an SRS OptiMelt MPA100 apparatus and were uncorrected. High Resolution Mass Spectrometry (HRMS) and Electrospray Ionization-Mass Spectrometry (ESI-MS) were recorded on an Agilent 6210 LC/TOFMS or Agilent 6550 QTOFMS. High Performance Liquid Chromatography (HPLC) were performed on SHIMADZU LC-20AT apparatus, using Daicel Chiralpak AD-H chiral column, eluted with a mixture of hexane and isopropyl alcohol. Optical Rotations were measured with Rudolph Autopol V polarimeter. X-ray crystallographic experiments were performed by the Crystallography Service of the Department of Chemistry, Zhejiang University.

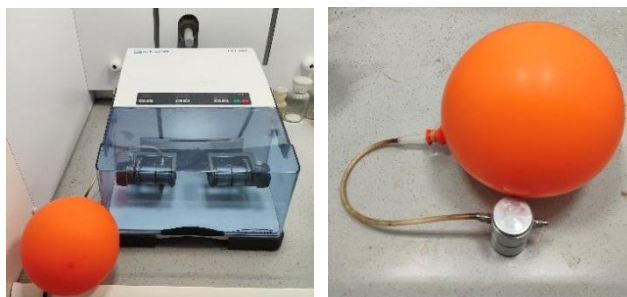

Mixer mill and stainless-steel vessels equipped with gas inlet and outlet valve

## 2. General procedures for the synthesis of ligands

### 2.1 The synthesis of **L13**<sup>4</sup>

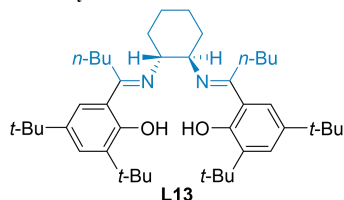

**Step1:** Following a modified procedure from White et al<sup>4</sup>. To a solution of 3,5-di-*tert*-butylsalicylic acid (10.0 mmol, 1.0 equiv) in thionyl chloride (60.0 mmol, 6.0 equiv) at room temperature was added a catalytic amount (5 drops) of DMF and the mixture was stirred for 12 h. Excess thionyl chloride was removed under reduced pressure on a rotary evaporator and the residue was taken up into 25 mL of pyridine. To this mixture at 0 °C were added DMAP (0.5 mmol, 0.05 equiv) and Me<sub>2</sub>NH (24.0 mmol, 2.4 equiv) and the reaction mixture was warmed to room temperature. Stirring was continued for an additional 3 h. The solution was poured into 300 mL of an ice-cold water containing 2N aqueous HCl (20 mL), at which time a white precipitate formed. The precipitate was filtered off and was crystallized from 100 mL of EtOH to give *N,N*-dimethyl-3,5-di-*tert*-butylsalicylamide as a yellowish solid (2.47 g, 89%, mp 123–124 °C).

**Step2:** To a solution of the *n*-BuLi (7.56 mmol, 2.1 equiv) at 0 °C was added a solution of *N,N*-dimethyl-3,5-di-*tert*-butylsalicylamide (3.6 mmol, 1.0 equiv) in THF (20 mL) dropwise. After the addition was completed, the reaction mixture was warmed to room temperature and was stirred for 3 h. The mixture was added to 10% aqueous HCl (100 mL) and was extracted with EtOAc (2 × 25 mL). The organic layer was washed with brine (3 × 20 mL), dried (Na<sub>2</sub>SO<sub>4</sub>), and evaporated in vacuo, and the crude residue was purified by flash chromatography to obtain 2,4-di-*tert*-butyl-6-pentanoylphenol as a yellowish solid (836.4 mg, 80%, mp 62–63 °C).

**Step3:** To a solution of (*R,R*)-1,2-diaminocyclohexane (0.76 mmol, 1.0 equiv) in EtOH (15 mL) was added a solution of 2,4-di-*tert*-butyl-6-pentanoylphenol (1.52 mmol, 2.0 equiv) in EtOH (5 mL). The suspension was refluxed for 6 h at which time a yellow precipitate had formed. The mixture was cooled to room temperature and the precipitate was filtered off. The crude solid was purified by flash chromatography on silica gel (5% EtOAc/hexanes) to give **L13** as an amorphous yellow solid (460.8 mg, 92%, mp 120–122 °C).

### 2.2 Typical synthesis of **L9** and **L14-L16**

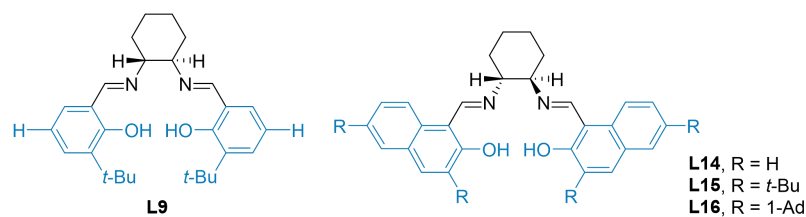

Typical synthesis of **L9** and **L14-L16**.<sup>5a</sup> Salicylaldehyde derivative (2.0 equiv) is added to a 0.2 M solution of (*R,R*)-1,2-diaminocyclohexane (1.0 equiv) in absolute ethanol. The mixture is heated to reflux for 6 h. After cooling down to room temperature, the reaction mixture was stored at -10 °C overnight. The resulting yellow crystalline solid was collected by filtration and washed with a small portion of cold ethanol.

### 3. Reaction optimization & typical procedures

#### 3.1 Optimization of the reaction conditions

**Table S1.** Screening of chemical conditions<sup>a</sup>

| entry           | catalyst                                             | oxidant        | L (mol%)  | yield (%) <sup>b</sup> | ee (%) <sup>b</sup> | <i>dr</i> <sup>b</sup> |
|-----------------|------------------------------------------------------|----------------|-----------|------------------------|---------------------|------------------------|
| 1               | Fe(OTf) <sub>3</sub>                                 | O <sub>2</sub> | –         | 18                     | –n.d.               | –n.d.                  |
| 2               | Fe(OTf) <sub>3</sub>                                 | O <sub>2</sub> | <b>L1</b> | 9                      | <5                  | 53:47                  |
| 3               | Fe(OTf) <sub>3</sub>                                 | O <sub>2</sub> | <b>L2</b> | trace                  | –n.d.               | –n.d.                  |
| 4               | Fe(OTf) <sub>3</sub>                                 | O <sub>2</sub> | <b>L3</b> | trace                  | –n.d.               | –n.d.                  |
| 5               | Fe(OTf) <sub>3</sub>                                 | O <sub>2</sub> | <b>L4</b> | 15                     | <5                  | 50:50                  |
| 6               | Fe(OTf) <sub>3</sub>                                 | O <sub>2</sub> | <b>L5</b> | 21                     | <5                  | 55:45                  |
| 7               | Fe(OTf) <sub>3</sub>                                 | O <sub>2</sub> | <b>L6</b> | 19                     | <5                  | 50:50                  |
| 8               | Fe(OTf) <sub>3</sub>                                 | O <sub>2</sub> | <b>L7</b> | trace                  | –n.d.               | –n.d.                  |
| 9               | Fe(OTf) <sub>3</sub>                                 | O <sub>2</sub> | <b>L8</b> | 22                     | 17                  | 55:45                  |
| 10 <sup>c</sup> | Fe(OTf) <sub>3</sub>                                 | O <sub>2</sub> | <b>L8</b> | 49                     | 23                  | 60:40                  |
| 11 <sup>d</sup> | Fe(OTf) <sub>3</sub>                                 | O <sub>2</sub> | <b>L8</b> | 39                     | 18                  | 57:43                  |
| 12 <sup>e</sup> | Fe(OTf) <sub>3</sub>                                 | O <sub>2</sub> | <b>L8</b> | 36                     | 11                  | 53:47                  |
| 13 <sup>f</sup> | Fe(OTf) <sub>3</sub>                                 | O <sub>2</sub> | <b>L8</b> | 31                     | 9                   | 55:45                  |
| 14 <sup>g</sup> | Fe(OTf) <sub>3</sub>                                 | O <sub>2</sub> | <b>L8</b> | 24                     | 20                  | 63:27                  |
| 15 <sup>c</sup> | FeCl <sub>3</sub>                                    | O <sub>2</sub> | <b>L8</b> | 65                     | <5                  | 55:45                  |
| 16 <sup>c</sup> | FeBr <sub>3</sub>                                    | O <sub>2</sub> | <b>L8</b> | 42                     | <5                  | 61:39                  |
| 17 <sup>c</sup> | Fe(NO <sub>3</sub> ) <sub>3</sub> ·9H <sub>2</sub> O | O <sub>2</sub> | <b>L8</b> | 27                     | 10                  | 69:31                  |
| 18 <sup>c</sup> | Fe(acac) <sub>3</sub>                                | O <sub>2</sub> | <b>L8</b> | 41                     | <5                  | 50:50                  |
| 19 <sup>c</sup> | Fe(OTf) <sub>2</sub>                                 | O <sub>2</sub> | <b>L8</b> | 10                     | 8                   | 68:32                  |
| 20 <sup>c</sup> | Fe(OTf) <sub>3</sub>                                 | air            | <b>L8</b> | –n.d.                  | –n.d.               | –n.d.                  |
| 21              | Fe(OTf) <sub>3</sub>                                 | DDQ            | <b>L8</b> | 28                     | <5                  | 50:50                  |

|                   |                      |                |           |       |       |       |
|-------------------|----------------------|----------------|-----------|-------|-------|-------|
| 22 <sup>h</sup>   | Fe(OTf) <sub>3</sub> | DDQ            | <b>L8</b> | 35    | <5    | 50:50 |
| 23                | Fe(OTf) <sub>3</sub> | BQ             | <b>L8</b> | 21    | <5    | 50:50 |
| 25 <sup>c,i</sup> | Fe(OTf) <sub>3</sub> | O <sub>2</sub> | <b>L8</b> | 53    | 11    | 55:45 |
| 26 <sup>c,j</sup> | Fe(OTf) <sub>3</sub> | O <sub>2</sub> | <b>L8</b> | trace | —n.d. | —n.d. |

<sup>a</sup> Reaction conditions: Fe(OTf)<sub>3</sub> (10 mol %), **L** (12 mol %), NaCl (3.0 g) were pre-milled at 25 Hz for 30 min, using two stainless-steel balls ( $d_{MB} = 1.0$  cm) in a 25 mL stainless vial, then, **1a** (0.2 mmol) and **2a** (0.2 mmol) and an oxidant were added and milled for another 30 min. <sup>b</sup> Yields are those of the isolated products, *ee* values were determined by HPLC, *dr* values were determined by <sup>1</sup>H NMR. <sup>c</sup> TFA (12.5 mol%) was added. <sup>d</sup> HOTf (12.5 mol%) was added. <sup>e</sup> MeSO<sub>3</sub>H (12.5 mol%) was added. <sup>f</sup> TCA (12.5 mol%) was added. <sup>g</sup> HOAc (12.5 mol%) was added. <sup>h</sup> DDQ were added in three portions. <sup>i</sup> Silica gel was used as milling auxiliary. <sup>j</sup> Anhydrous sodium sulfate was used as milling auxiliary. n.d. = not detected.

**Table S2.** Optimization of salen-type ligands<sup>a</sup>

| entry           | <b>L</b> (mol%) | yield (%) <sup>b</sup> | <i>ee</i> (%) <sup>b</sup> | <i>dr</i> <sup>b</sup> |
|-----------------|-----------------|------------------------|----------------------------|------------------------|
| 1               | <b>L9</b> (12)  | 52                     | <5                         | 50:50                  |
| 2               | <b>L10</b> (12) | 38                     | <5                         | 50:50                  |
| 3               | <b>L11</b> (12) | 33                     | <5                         | 50:50                  |
| 4               | <b>L12</b> (12) | 60                     | -20                        | 50:50                  |
| 5               | <b>L13</b> (12) | 38                     | <5                         | 48:52                  |
| 6               | <b>L14</b> (12) | 76                     | <5                         | 57:43                  |
| 7               | <b>L15</b> (12) | 65                     | 46                         | 68:32                  |
| 8               | <b>L15</b> (10) | 66                     | 42                         | 65:35                  |
| 9               | <b>L15</b> (8)  | 68                     | 38                         | 60:40                  |
| 10              | <b>L15</b> (15) | 65                     | 45                         | 70:30                  |
| 11 <sup>c</sup> | <b>L15</b> (12) | 52                     | 36                         | 65:35                  |
| 12 <sup>d</sup> | <b>L15</b> (12) | 48                     | 20                         | 60:40                  |
| 13 <sup>e</sup> | <b>L15</b> (12) | 41                     | 17                         | 62:38                  |
| 14 <sup>f</sup> | <b>L15</b> (12) | 32                     | 37                         | 66:34                  |
| 15              | <b>L16</b> (12) | 45                     | 15                         | 65:35                  |

<sup>a</sup> Reaction conditions: Fe(OTf)<sub>3</sub> (10 mol %), **L**, TFA (12.5 mol%) and NaCl (3.0 g) were pre-milled at 25 Hz for 30 min, using two stainless-steel balls ( $d_{MB} = 1.0$  cm) in a 25 mL stainless vial, then, **1a** (0.2 mmol) and **2a** (0.2 mmol) were added and O<sub>2</sub> was filled in and milled for another 30 min. <sup>b</sup> Yields are those of the isolated products, *ee* values were determined by HPLC, *dr* values were determined by <sup>1</sup>H NMR. <sup>c</sup> HOTf (12.5 mol%) was added. <sup>d</sup> MeSO<sub>3</sub>H (12.5 mol%) was added. <sup>e</sup> TCA (12.5 mol%) was added. <sup>f</sup> HOAc (12.5 mol%) was added.

**Table S3.** Screening of LAGs<sup>a</sup>

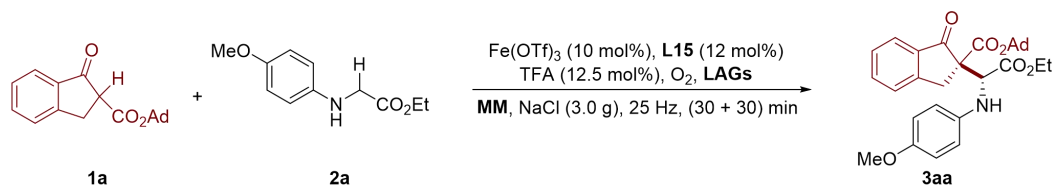

| entry           | LAGs ( <i>η</i> )      | yield (%) <sup>[b]</sup> | <i>ee</i> (%) <sup>[b]</sup> | <i>dr</i> <sup>[b]</sup> |
|-----------------|------------------------|--------------------------|------------------------------|--------------------------|
| 1               | –                      | 65                       | 46                           | 68:32                    |
| 2               | EtOAc (0.77)           | 68                       | 44                           | 50:50                    |
| 3               | <i>n</i> -BuOAc (0.77) | 67                       | 57                           | 50:50                    |
| 4               | <i>i</i> -PrOAc (0.77) | 69                       | 70                           | 58:42                    |
| 5               | <i>t</i> -BuOAc (0.77) | 69                       | 75                           | 66:34                    |
| 6               | MeOH (0.77)            | 50                       | <5                           | 55:45                    |
| 7               | EtOH (0.77)            | 48                       | <5                           | 55:45                    |
| 8               | <i>n</i> -BuOH (0.77)  | 66                       | 60                           | 60:40                    |
| 9               | <i>i</i> -PrOH (0.77)  | 66                       | 70                           | 70:30                    |
| 10              | <i>t</i> -BuOH (0.77)  | 70                       | 80                           | 78:22                    |
| 11              | <i>t</i> -BuOH (0.96)  | 74                       | 85                           | 75:25                    |
| 12              | <i>t</i> -BuOH (1.16)  | 75                       | 87                           | 85:15                    |
| 13              | <i>t</i> -BuOH (1.37)  | 67                       | 87                           | 81:19                    |
| 14              | <i>t</i> -BuOH (1.54)  | 56                       | 85                           | 80:20                    |
| 15 <sup>c</sup> | <i>t</i> -BuOH (1.16)  | 65                       | -44                          | 50:50                    |
| 16 <sup>d</sup> | <i>t</i> -BuOH (1.16)  | 78                       | 17                           | 60:40                    |
| 17 <sup>e</sup> | <i>t</i> -BuOH (1.16)  | 65                       | 33                           | 64:36                    |

<sup>a</sup> Reaction conditions: Fe(OTf)<sub>3</sub> (10 mol %), **L15** (12 mol%), LAGs [ $\eta = V$  (liquid;  $\mu\text{L}$ )/ $m$  (reagents; mg)], TFA (12.5 mol%) and NaCl (3.0 g) were pre-milled at 25 Hz for 30 min, using two stainless-steel balls ( $d_{\text{MB}} = 1.0$  cm) in a 25 mL stainless vial, then, **1a** (0.2 mmol) and **2a** (0.2 mmol) were added and O<sub>2</sub> was filled in and milled for another 30 min. <sup>b</sup> Yields are those of the isolated products, *ee* values were determined by HPLC, *dr* values were determined by <sup>1</sup>H NMR. <sup>c</sup> **L12** was used as ligand. <sup>d</sup> **L14** was used as ligand. <sup>e</sup> **L16** was used as ligand.

**Table S4.** Screening of the mechanical parameters<sup>a</sup>

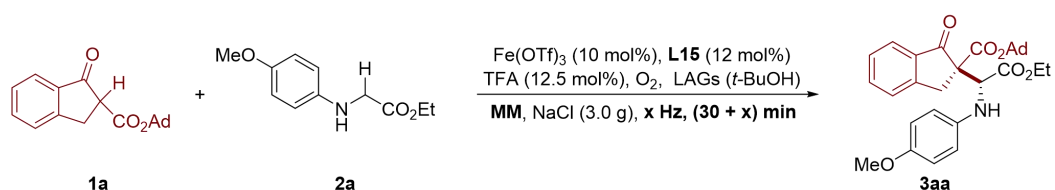

| entry           | frequency/Hz | balls (n×mm) | time (min+min) | yield (%) <sup>b</sup> | <i>ee</i> (%) <sup>b</sup> | <i>dr</i> <sup>b</sup> |
|-----------------|--------------|--------------|----------------|------------------------|----------------------------|------------------------|
| 1               | 15           | 2×10         | 30+30          | 70                     | 84                         | 75:25                  |
| 2               | 20           | 2×10         | 30+30          | 76                     | 87                         | 86:14                  |
| 3               | 25           | 2×10         | 30+30          | 75                     | 87                         | 85:15                  |
| 4               | 30           | 2×10         | 30+30          | 50                     | 77                         | 60:40                  |
| 5               | 20           | 2×10         | 30+25          | 75                     | 90                         | 86:14                  |
| 6               | 20           | 2×10         | 30+20          | 67                     | 84                         | 76:24                  |
| 7               | 20           | 2×10         | 30+15          | 43                     | 76                         | 55:45                  |
| 8               | 20           | 2×11         | 30+25          | 77                     | 91                         | 86:14                  |
| 9               | 20           | 2×14         | 30+25          | 87                     | 93                         | 90:10                  |
| 10 <sup>c</sup> | 20           | 2×14         | 30+25          | 88                     | 95                         | 90:10                  |
| 11              | 20           | 2×15         | 30+25          | 86                     | 82                         | 75:25                  |
| 12              | 20           | 1×15         | 30+25          | 75                     | 77                         | 77:23                  |
| 13              | 20           | 1×14         | 30+25          | 59                     | 76                         | 74:26                  |

<sup>a</sup> Reaction conditions: Fe(OTf)<sub>3</sub> (10 mol %), **L15** (12 mol%), *t*-BuOH ( $\eta = 1.16$ ), TFA (12.5 mol%) and NaCl (3.0 g) were pre-milled at a specific frequency for 30 min, using two stainless-steel balls in a 25 mL stainless vial, then, **1a** (0.2 mmol) and **2a** (0.2 mmol) were added and O<sub>2</sub> was filled in and milled for several minutes. <sup>b</sup> Yields are those of the isolated products. *ee* values were determined by HPLC. *dr* values were determined by <sup>1</sup>H NMR. <sup>c</sup> NaCl (2.0 g), *t*-BuOH ( $\eta = 0.58$ ) were used.

**Table S5.** Screening of aging conditions<sup>a</sup>

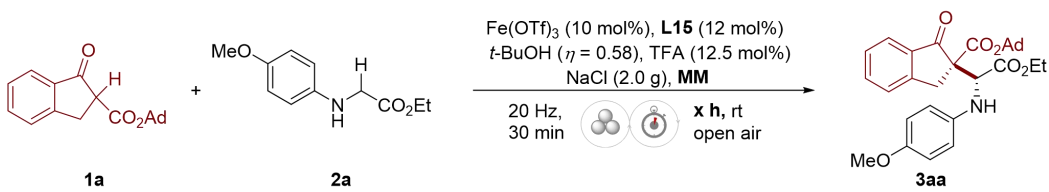

| entry          | aging time (h) | yield (%) <sup>b</sup> | <i>ee</i> (%) <sup>b</sup> | <i>dr</i> <sup>b</sup> |
|----------------|----------------|------------------------|----------------------------|------------------------|
| 1              | 0              | —n.d.                  | —n.d.                      | —n.d.                  |
| 2              | 2              | 68                     | 90                         | 88:12                  |
| 3              | 4              | 70                     | 80                         | 80:20                  |
| 4              | 6              | 64                     | 64                         | 72:28                  |
| 5              | 12             | 60                     | 35                         | 60:40                  |
| 6 <sup>c</sup> | 12             | —n.d.                  | —n.d.                      | —n.d.                  |

<sup>a</sup> Reaction conditions: **1a** (0.2 mmol), **2a** (0.2 mmol), Fe(OTf)<sub>3</sub> (10 mol %), **L15** (12 mol%), *t*-BuOH ( $\eta = 0.58$ ), TFA (12.5 mol%) and NaCl (2.0 g) were pre-milled at 20 Hz for 30 min, using two stainless-steel balls ( $d_{MB} = 1.4$  cm) in a 25 mL stainless vial, then the contents were scratched off the vessel and aging at in a 50 mL opened flask for several hours. <sup>b</sup> Yields are those of the isolated products. *ee* values were determined by HPLC. *dr* values were determined by <sup>1</sup>H NMR. <sup>c</sup> The reaction was initially performed via grinding with a mortar and a pestle.

### 3.2 Typical procedures for LAG induced asymmetric CDC reaction

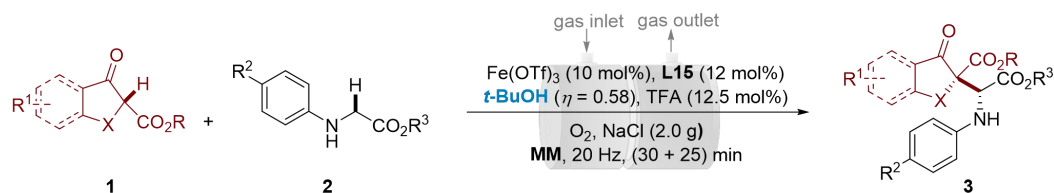

A mixture of Fe(OTf)<sub>3</sub> (10 mol %, 0.1 equiv), **L15** (12 mol%, 0.12 equiv), TFA (12.5 mol%, 0.125 equiv), *t*-BuOH ( $\eta = 0.58$ ) and NaCl (2.0 g) was placed in a stainless-steel vessel (25 mL, equipped with gas inlet and outlet valve) with two stainless-steel balls ( $d_{MB} = 1.4$  cm). Then, the ball milling vessel was placed in the mixer mill and pre-milled at 20 Hz for 30 min. After that, **1** (0.2 mmol, 1.0 equiv) and **2** (0.2 mmol, 1.0 equiv) were added and oxygen was filled in through the gas inlet valve. The mixtures were milled at 20 Hz for another 25 min, then the contents were scratched off the vessel and purified directly by column chromatography on silica gel using EtOAc/*n*-hexane as eluent to give the desired products **3**.

### 3.3 Typical procedures for asymmetric CDC reaction under accelerating aging conditions

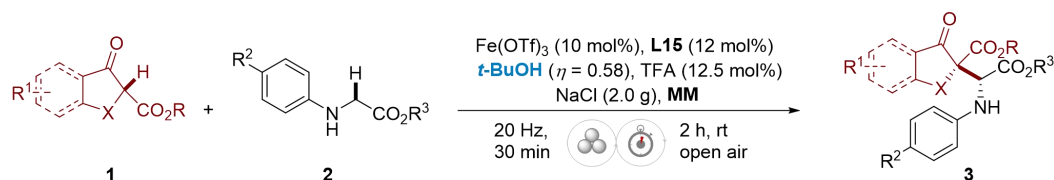

A mixture of **1** (0.2 mmol, 1.0 equiv), **2** (0.2 mmol, 1.0 equiv), Fe(OTf)<sub>3</sub> (10 mol %, 0.1 equiv), **L15** (12 mol%, 0.12 equiv), TFA (12.5 mol%, 0.125 equiv), *t*-BuOH ( $\eta = 0.58$ ) and NaCl (2.0 g) was placed in a stainless-steel vessel (25 mL) with two stainless-steel balls ( $d_{MB} = 1.4$  cm). Then, the ball milling vessel was placed in the mixer mill and milled at 20 Hz for 30 min. Then the contents were scratched off the vessel and aging in an opened flask (50 mL) for 0.5–2 h. After the reaction was completed, the powders were purified directly by column chromatography on silica gel using EtOAc/*n*-hexane as eluent to give the desired products **3**.

### 3.4 Typical procedure for the preparation of racemic products

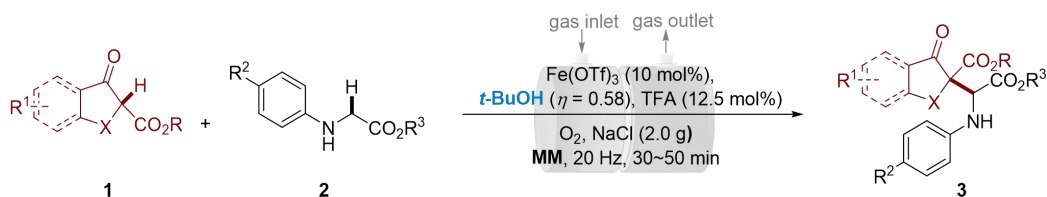

A mixture of **1** (0.2 mmol, 1.0 equiv), **2** (0.2 mmol, 1.0 equiv), Fe(OTf)<sub>3</sub> (10 mol %, 0.1 equiv), TFA (12.5 mol%, 0.125 equiv), *t*-BuOH ( $\eta = 0.58$ ) and NaCl (2.0 g) was placed in a stainless-steel vessel (25 mL, equipped with gas inlet and outlet valve) with two stainless-steel balls ( $d_{MB} = 1.4$  cm). Then, the ball milling vessel was placed in the mixer mill, oxygen was filled in through the gas inlet valve, and the mixtures were milled at 20 Hz for 30–50 min. After the reaction was completed, the contents were scratched off the vessel and purified directly by column chromatography on silica gel using EtOAc/*n*-hexane as eluent to give the racemic products **3**.

### 3.5 Comparative experiments under solution-based conditions

#### Wang' conditions

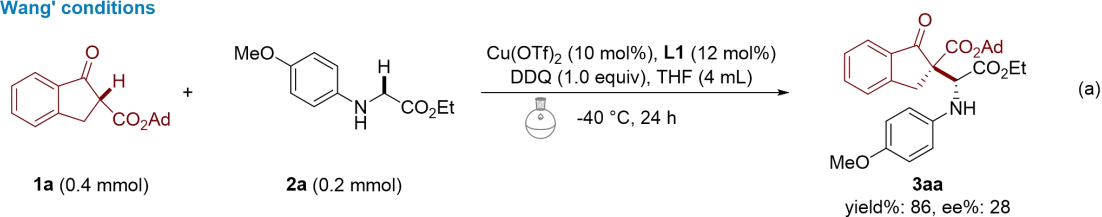

#### Solution conditions in *t*-BuOH

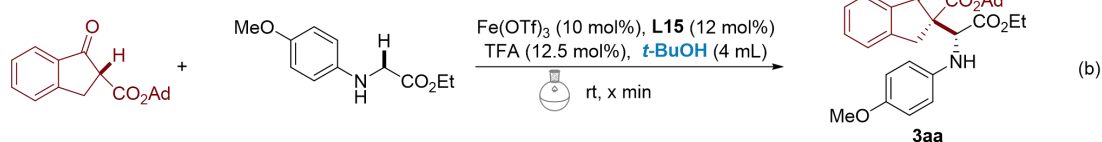

| without O <sub>2</sub> (at open air): |            | with O <sub>2</sub> (1 atm): |            |
|---------------------------------------|------------|------------------------------|------------|
| n.d.                                  | 30 min     | 60 min                       | 240 min    |
| yield%/ee%                            | yield%/ee% | yield%/ee%                   | yield%/ee% |
|                                       | 7, 46      | 11, 44                       | 30, 11     |

#### Solution conditions in THF

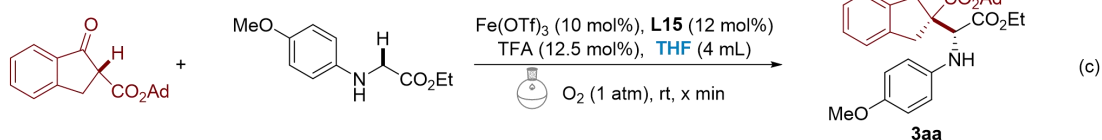

| solvent                        | 30 min<br>yield%/ee% | 60 min<br>yield%/ee% | 240 min<br>yield%/ee% |
|--------------------------------|----------------------|----------------------|-----------------------|
| THF                            | n.d., 36             | n.d., 33             | 36, 0                 |
| THF/<br><i>t</i> -BuOH (4 eq.) | n.d., 58             | n.d., 57             | 40, 21                |

**Scheme S1.** Reaction of **1a** and **2a** under solution-based conditions. Reaction conditions: (a) the reaction was proceeded under Wang's optimal conditions<sup>6</sup> using THF (4 mL) as solvent and **L1** as ligand. (b) Fe(OTf)<sub>3</sub> (10 mol%), **L15** (12 mol%) and TFA (12.5 mol%) were placed in a flask (25 mL) with *t*-BuOH (4 mL) and pre-stirred at rt for 30 min, then **1** (0.2 mmol, 1.0 equiv) and **2** (0.2 mmol, 1.0 equiv) was added, the mixtures were stirring under the air (for 12 h) or oxygen (for 30 min–240 min) atmospheres. To evaluate the yields at different reaction times (30 min, 60 min and 240 min), three individual reactions were carried out respectively. (c) Fe(OTf)<sub>3</sub> (10 mol%), **L15** (12 mol%) and TFA (12.5 mol%) were placed in a flask (25 mL) with THF (4 mL) and pre-stirred in the presence/absence of *t*-BuOH (4 equiv, 75  $\mu$ L) at rt for 30 min, then **1** (0.2 mmol, 1.0 equiv) and **2** (0.2 mmol, 1.0 equiv) was added, the mixtures were stirring under oxygen atmospheres for 30 min–240 min.

### 3.6 Comparative experiment under neat stirring conditions

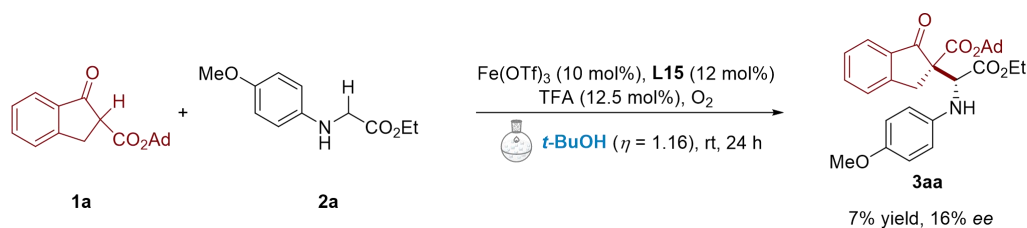



**Scheme S2.** Reaction of **1a** and **2a** under neat stirring conditions. Reaction conditions: Fe(OTf)<sub>3</sub> (10 mol%), **L15** (12 mol%) TFA (12.5 mol%) and *t*-BuOH ( $\eta = 1.16$ , 150  $\mu$ L) were placed in a flask (25 mL) with and pre-stirred at rt for 30 min, then **1** (0.2 mmol, 1.0 equiv) and **2** (0.2 mmol, 1.0 equiv) was added, and the mixtures were stirring under oxygen atmospheres for 24 h.

To illustrate the advantageous of the mechanochemical LAG conditions, the model reaction was conducted at magnetic stirring with 4 equiv. *t*-BuOH (150  $\mu$ L) as additive. It has showed that without sufficient mechanical impact, the reactants and the catalyst could not efficiently mix and interact with each other, thus very small amount of the product (7%) was obtained with poor enantioselectivity (16% *ee*).

#### 4. Mechanism study

##### 4.1 Control experiments

To demonstrate the actual role of Fe(III) and oxygen, the reactions were carried out under nitrogen atmospheres using either catalytic amount of Fe(OTf)<sub>3</sub> (10 mol%) or stoichiometric Fe(OTf)<sub>3</sub> (100 mol%). The results clearly showed that oxygen was an indispensable oxidant for this mechanochemical asymmetric CDC reaction, while Fe(III) could not play the role of an oxidant.

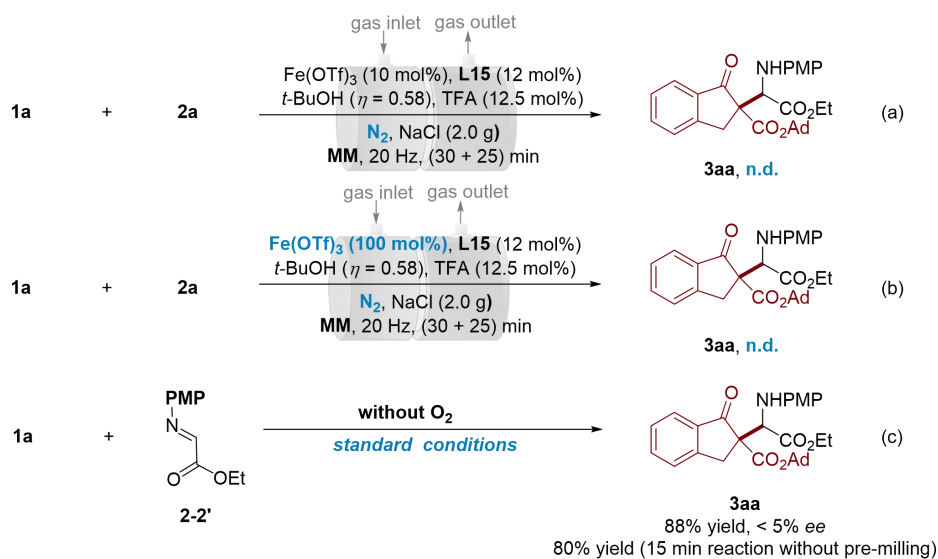

**Scheme S3.** Reaction of **1a** and **2a** under nitrogen atmospheres. Reaction conditions: (a) Fe(OTf)<sub>3</sub> (10 mol%), **L15** (12 mol%), *t*-BuOH ( $\eta = 0.58$ ), TFA (12.5 mol%) and NaCl (2.0 g) were placed in a stainless-steel vessel (25 mL, equipped with gas inlet and outlet valve) with two stainless-steel balls ( $d_{MB} = 1.4$  cm) in a mixer mill and pre-milled at 20 Hz for 30 min. Then, **1a** (0.2 mmol) and **2a** (0.2 mmol) were added and the mixtures were milled for another 25 min under nitrogen atmospheres. (b) Fe(OTf)<sub>3</sub> (100 mol %) was used. (c) Fe(OTf)<sub>3</sub> (10 mol%), **L15** (12 mol%), *t*-BuOH ( $\eta = 0.58$ ), TFA (12.5 mol%) and NaCl (2.0 g) were placed in a stainless-steel vessel (25 mL) with two stainless-steel balls ( $d_{MB} = 1.4$  cm) in a mixer mill and pre-milled at 20 Hz for 30 (0) min. Then, **1a** (0.2 mmol) and **2-2'** (0.2 mmol) were added and the mixtures were milled for another 25 (15) min.

##### 4.2 Radical trapping experiments

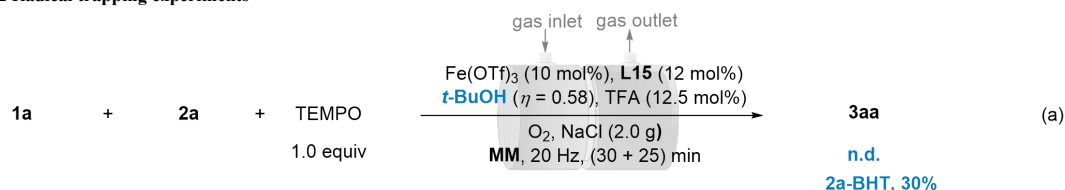

**Scheme S4.** Radical trapping experiments. Reaction conditions: (a) Fe(OTf)<sub>3</sub> (10 mol %), **L15** (12 mol%), *t*-BuOH ( $\eta = 0.58$ ), TFA (12.5 mol%) and NaCl (2.0 g) were placed in a stainless-steel vessel (25 mL, equipped with gas inlet and outlet valve) with two stainless-steel balls ( $d_{MB} = 1.4$  cm) in a mixer mill and pre-milled at 20 Hz for 30 min. Then, **1a** (0.2 mmol), **2a** (0.2 mmol) and TEMPO (1.0 equiv.) were added and the mixtures were milled for another 25 min under oxygen atmospheres. (b) **1** (0.2 mmol, 1.0 equiv), **2** (0.2 mmol, 1.0 equiv), Fe(OTf)<sub>3</sub> (10 mol %, 0.1 equiv), **L15** (12 mol%, 0.12 equiv), TFA (12.5 mol%, 0.125 equiv), *t*-BuOH ( $\eta = 0.58$ ) and NaCl (2.0 g) were milled in the presence of TEMPO (1.0 equiv.) at 20 Hz for 30 min. Then, aging in an opened flask (100 mL) for 2 h. (c) **1** (0.2 mmol, 1.0 equiv), **2** (0.2 mmol, 1.0 equiv), Fe(OTf)<sub>3</sub> (10 mol %, 0.1 equiv), **L15** (12 mol%, 0.12 equiv), TFA (12.5 mol%, 0.125 equiv), *t*-BuOH ( $\eta = 0.58$ ) and NaCl (2.0 g) were milled in the presence of BHT (2.0 equiv.) at 20 Hz for 30 min. Then, aging in an opened flask (100 mL) for 2 h.

##### 4.3 Iron-complexes capturing experiments

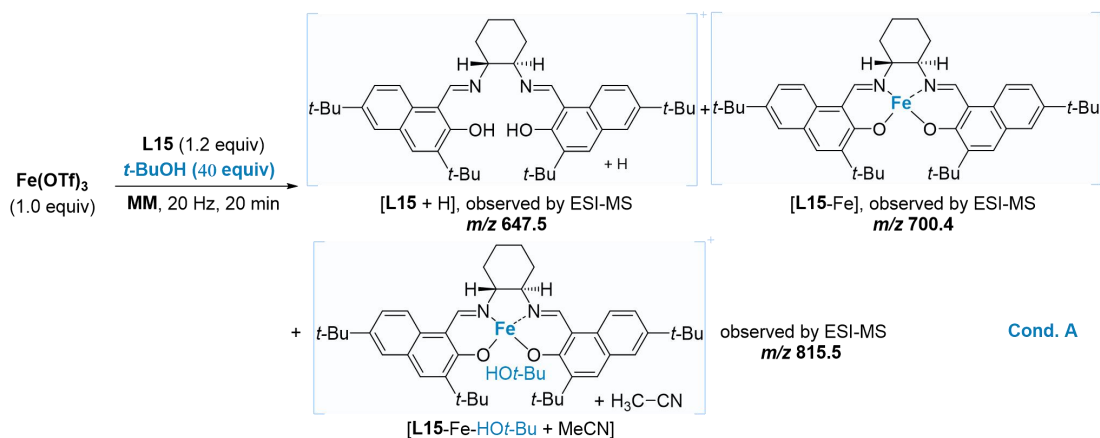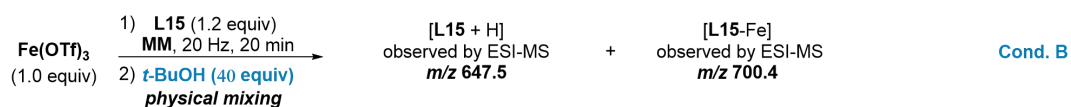

**Scheme S5.** The reaction of  $\text{Fe}(\text{OTf})_3$ , **L15** and *t*-BuOH. **Condition A:**  $\text{Fe}(\text{OTf})_3$  (0.02 mmol, 1.0 equiv), **L15** (0.024 mmol, 1.2 equiv), *t*-BuOH (40 equiv, 150  $\mu\text{L}$ ) were placed in a stainless-steel vessel (25 mL) with two stainless-steel balls ( $d_{\text{MB}} = 1.4$  cm) in a mixer mill and milled at 20 Hz for 30 min. The mixtures were then quickly determined by ESI-MS. **Condition B:**  $\text{Fe}(\text{OTf})_3$  (0.02 mmol, 1.0 equiv) and **L15** (0.024 mmol, 1.2 equiv) were placed in a stainless-steel vessel (25 mL) with two stainless-steel balls ( $d_{\text{MB}} = 1.4$  cm) in a mixer mill and milled at 20 Hz for 30 min. Then, *t*-BuOH (40 equiv, 150  $\mu\text{L}$ ) was added and mixed manually. The mixtures were then quickly determined by ESI-MS.

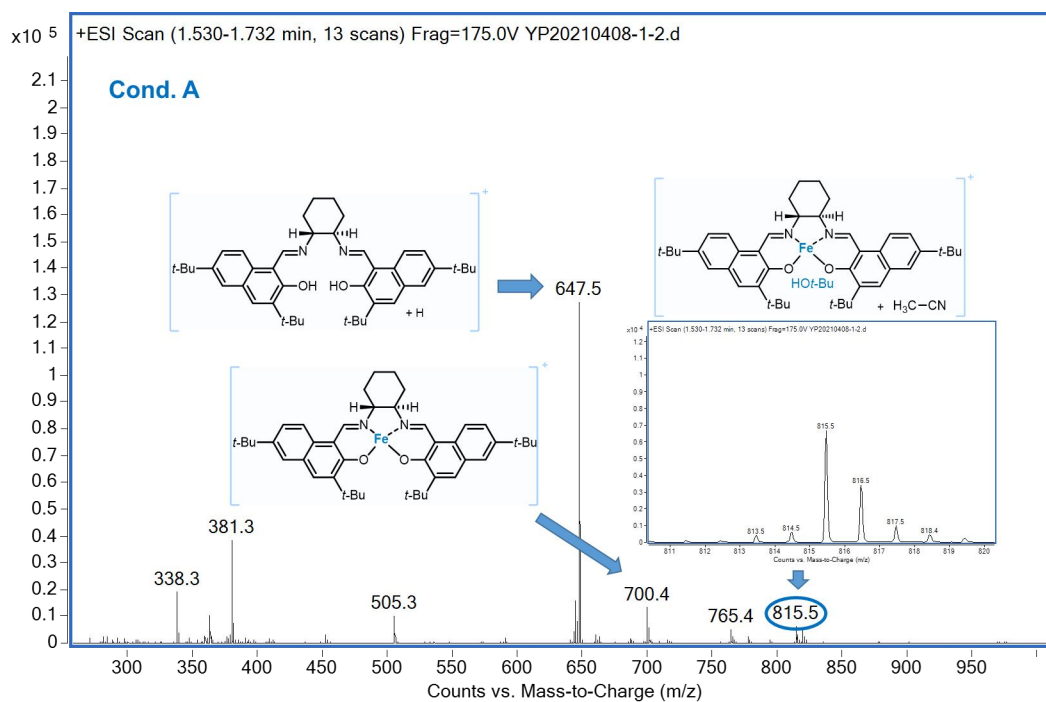

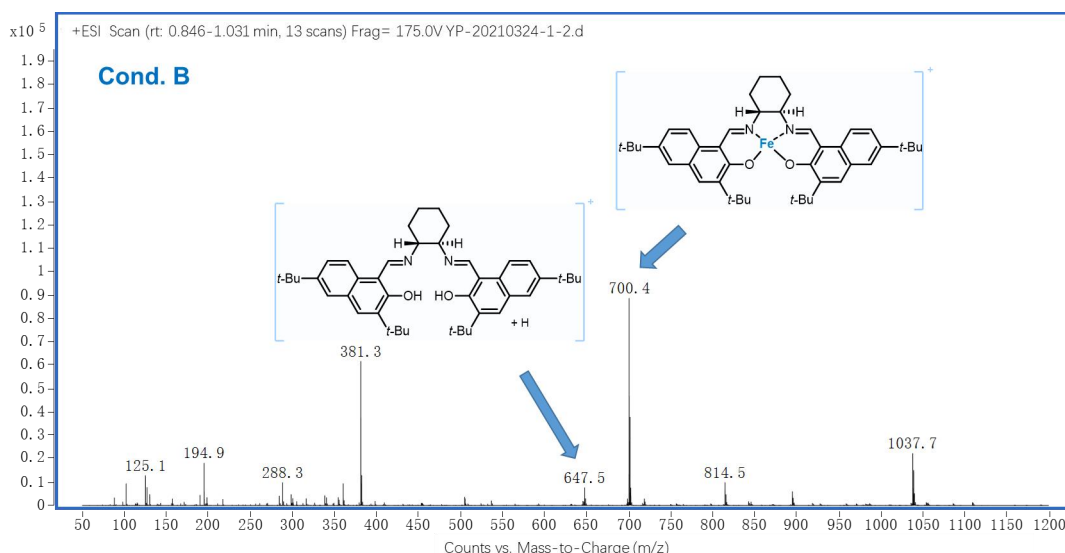

**Figure S1.** Mass spectra for the reaction of Fe(OTf)<sub>3</sub>, L15 and *t*-BuOH under conditions A and B

To probe the actual catalytic system in the LAG reaction, ESI-MS analysis was employed to detect the mixtures after ball-milling of Fe(OTf)<sub>3</sub>, L15 and *t*-BuOH. Two peaks that assigned to Fe-complexes [L15-Fe]<sup>+</sup> (*m/z* 700.4) and [L15-Fe-*t*-BuOH+MeCN]<sup>+</sup> (*m/z* 815.5) were found (Figure S1, Cond. A). In stark contrast, neat grinding of Fe(OTf)<sub>3</sub> and L15 followed by physical mixing with *t*-BuOH gave only [L15-Fe]<sup>+</sup> (*m/z* 700.4) and [L15+H]<sup>+</sup> (*m/z* 647.5) species, implying that mechanical impact was essential for accessing the L-Fe-butanol complex, which is likely an active catalytic species, and the interference caused by ionization during the MS detection could also be excluded.

### 5. Crystal data for 3aa (minor diastereomers)

We've tried our best to cultivate the single crystal of the chiral products although all of them are oil-like compounds. During the cultivation of 3aa, trace crystals were appeared. X-ray analysis showed that the space group of its crystal structure is centrally symmetric, where C08 and C21 are in opposite configurations which can be assigned to the racemic mixture of *RR* and *SS* configurations. HPLC analysis of this single crystal showed that the retention times of the main components (> 99% conc.) was at 30.6 minutes and 38.0 minutes, respectively (Fig. S2, left bottom), which belongs to the minor diastereomers of 3aa (Fig. S2, right bottom).

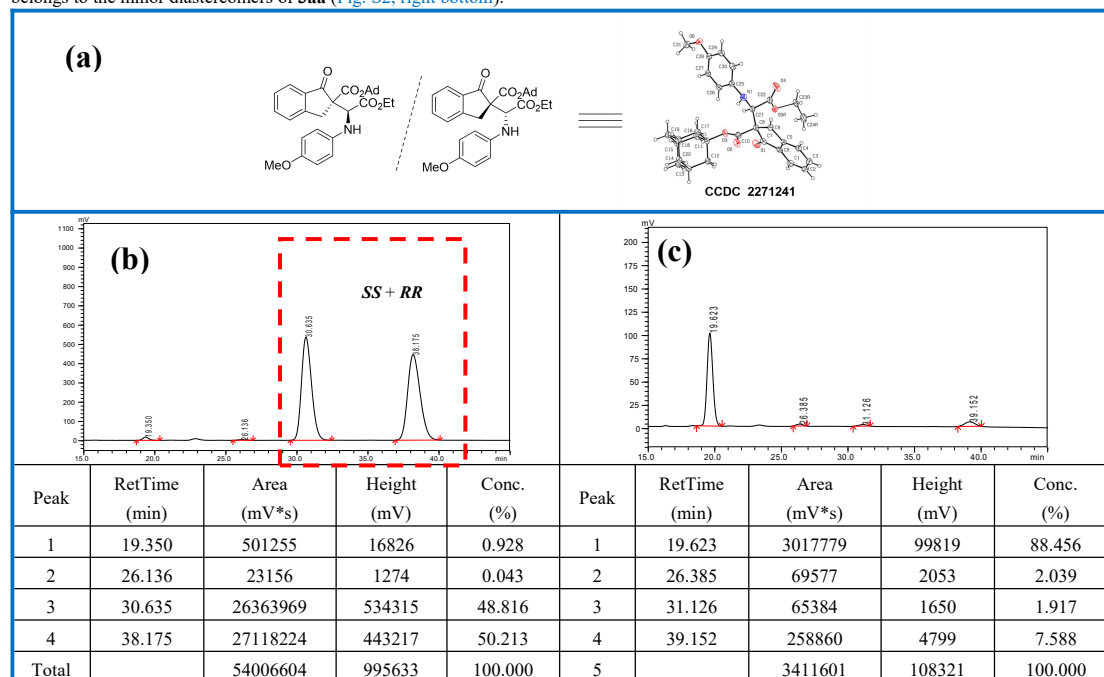

**Figure S2.** X-ray crystal diffraction and HPLC results of 3aa. (a) X-Ray crystal structure, ellipsoids are drawn at the 30% probability level. (b) HPLC result of the trace crystal from 3aa. (c) HPLC result of 3aa.

Single crystal of minor diastereomers of **3aa** suitable for X-ray analysis was obtained by slow evaporation of 0.01 M solution in 7:3 mixture of petroleum ether/ ethyl acetate at room temperature. A suitable crystal was selected on a Bruker APEX-II CCD diffractometer. The crystal was kept at 296.15 K during data collection. Using Olex2,<sup>[7]</sup> the structure was solved with the SHELXT<sup>[8]</sup> structure solution program using Intrinsic Phasing and refined with the SHELXL<sup>[9]</sup> refinement package using Least Squares minimisation.

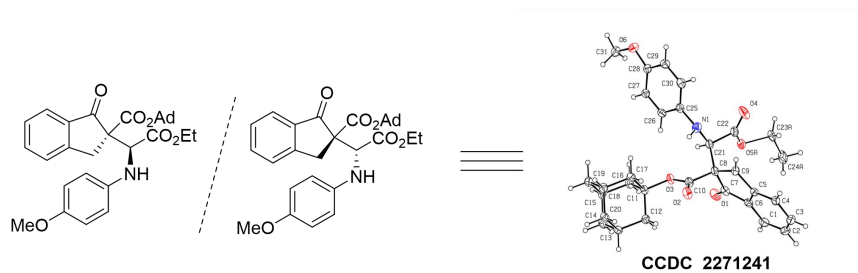

Bond precision: C-C = 0.0030 Å Wavelength=0.71073  
 Cell: a=9.1513(2) b=17.6562(4) c=16.4315(4)  
 alpha=90 beta=91.946(1) gamma=90

Temperature: 170 K

|                        | Calculated   | Reported     |
|------------------------|--------------|--------------|
| Volume                 | 2653.43(11)  | 2653.42(11)  |
| Space group            | P 21/c       | P 1 21/c 1   |
| Hall group             | -P 2ybc      | -P 2ybc      |
| Moiety formula         | C31 H34 N O6 | C31 H34 N O6 |
| Sum formula            | C31 H34 N O6 | C31 H34 N O6 |
| Mr                     | 516.59       | 516.59       |
| Dx, g cm <sup>-3</sup> | 1.293        | 1.293        |
| Z                      | 4            | 4            |
| Mu (mm <sup>-1</sup> ) | 0.089        | 0.089        |
| F 000                  | 1100.0       | 1100.0       |
| F000'                  | 1100.55      |              |
| h, k, lmax             | 11, 22, 21   | 11, 22, 21   |
| Nref                   | 6080         | 6078         |
| Tmin, Tmax             | 0.963, 0.974 | 0.698, 0.746 |
| Tmin'                  | 0.4963       |              |

Correction method= # Reported T Limits: Tmin=0.698 Tmax=0.746

AbsCorr = MULTI-SCAN

Data completeness = 1.000

Theta(max) = 27.497

R(reflections) = 0.0576 (4655)

wR2(reflections) = 0.1596 (6078)

S = 1.016 Npar= 374

## 6. Green chemistry metrics evaluation

**Table S6.** Comparison of green chemistry metrics<sup>[a]</sup>

| reaction conditions <sup>[a]</sup> | LAG method                     | AA method           | stirring in <i>t</i> -BuOH | stirring in THF                       | Wang's method  |
|------------------------------------|--------------------------------|---------------------|----------------------------|---------------------------------------|----------------|
| yield (%) / <i>ee</i> (%)          | 87/95                          | 68/90               | 30/11                      | 40/21                                 | 86/28          |
| oxidant (eq.) / additive (eq.)     | O <sub>2</sub> /TFA<br>(0.125) | air/TFA<br>(0.125)  | O <sub>2</sub>             | O <sub>2</sub>                        | DDQ<br>(1.0)   |
| time (min)                         | 55                             | 150                 | 240                        | 240                                   | 1440           |
| solvent (μL)                       | <i>t</i> -BuOH (75)            | <i>t</i> -BuOH (75) | <i>t</i> -BuOH<br>(4000)   | THF (4000) /<br><i>t</i> -BuOH (4 eq) | THF<br>(4000)  |
| temperature (°C)                   | rt                             | rt                  | rt                         | rt                                    | -40            |
| atmosphere                         | O <sub>2</sub>                 | air                 | O <sub>2</sub>             | O <sub>2</sub>                        | N <sub>2</sub> |

|                    |                                                                               |                                |                                |        |       |                                         |
|--------------------|-------------------------------------------------------------------------------|--------------------------------|--------------------------------|--------|-------|-----------------------------------------|
| specific operation |                                                                               | -                              | -                              | -      | -     | the solution of DDQ in THF slowly added |
| <b>E-factor</b>    | $\frac{\sum m(\text{Input material}) - m(\text{Product})}{m(\text{Product})}$ | 23.31<br>(1.11) <sup>[b]</sup> | 30.11<br>(1.92) <sup>[b]</sup> | 102.93 | 89.61 | 42.02                                   |
| <b>SI</b>          | $\frac{\sum m(\text{Solvents})}{m(\text{Product})}$                           | 0.65                           | 0.83                           | 99.68  | 85.99 | 40.00                                   |
| <b>MI</b>          | $\frac{\sum m(\text{Input materials})}{m(\text{Product})}$                    | 24.31<br>(2.11) <sup>[b]</sup> | 31.11<br>(2.92) <sup>[b]</sup> | 103.93 | 90.61 | 43.02                                   |

[a] Details see section 3.5. [b] Grinding auxiliary was excluded (according to our previous work see ref.10, NaCl can be easily recycled and reused).

#### LAG method

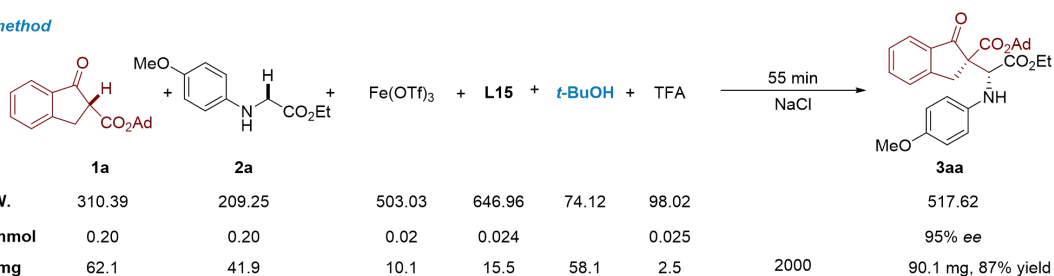

#### AA method

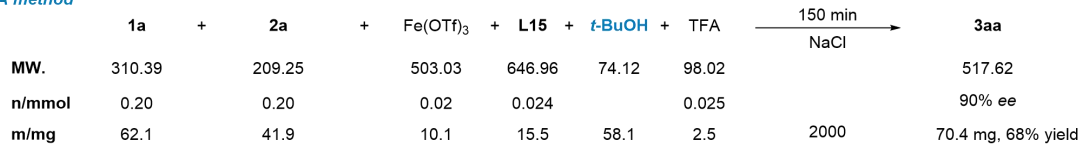

#### Stirring in t-BuOH

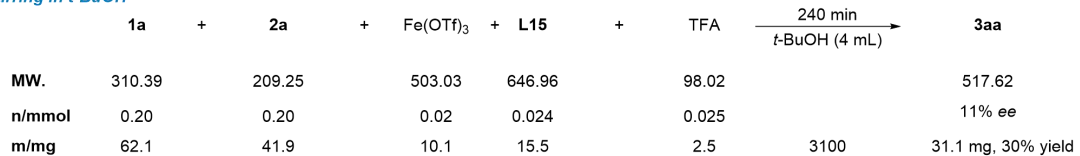

#### Stirring in THF

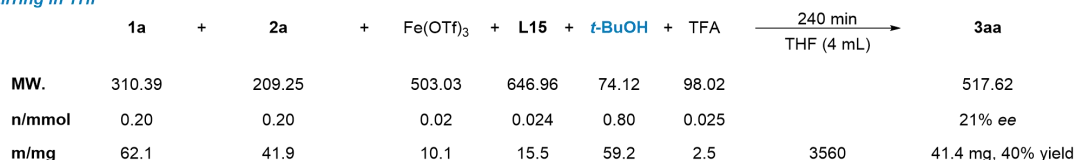

#### Wang's method

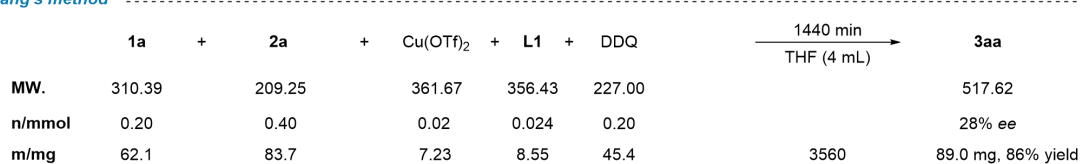

Scheme S6. Green chemistry metrics calculations.

## 7. Characterization data (HPLC spectra)

### 7.1 Ligands

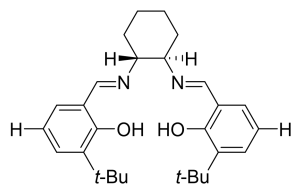

6,6'-((1E,1'E)-((1R,2R)-cyclohexane-1,2-diyl)bis(azanylylidene))bis(methanylylidene))bis(2-(tert-butyl)phenol) (**L9**)<sup>5a</sup>

Yellow solid; mp 66–67 °C (67–69 °C<sup>5a</sup>); <sup>1</sup>H NMR (400 MHz, CDCl<sub>3</sub>) δ 13.84 (s, 2H), 8.30 (s, 2H), [7.53, 7.40] (dd, *J* = 7.6, 1.6 Hz, 1H), 7.24 (d, *J* = 1.6 Hz, 1H), 7.01 (d, *J* = 7.2 Hz, 2H), 6.75–6.69 (m, 2H), 3.43–3.27 (m, 2H), 2.02–1.94 (m, 2H), 1.93–1.85 (m, 2H), 1.81–1.72 (m, 2H), 1.52–1.45 (m, 2H), 1.40 (s, 18H). **Optical Rotation:** [ $\alpha$ ]<sub>D</sub><sup>25</sup> = -521.6 (c = 1.0, CH<sub>2</sub>Cl<sub>2</sub>) { [ $\alpha$ ]<sub>D</sub><sup>20</sup> = -523 (c = 1.0, CH<sub>2</sub>Cl<sub>2</sub>)<sup>5b</sup> }.

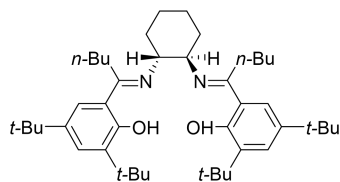

6,6'-((1E,1'E)-((1R,2R)-cyclohexane-1,2-diyl)bis(azanylylidene))bis(2,2-dimethylpropan-1-yl-1-ylidene))bis(2,4-di-tert-butylphenol) (**L13**)

Yellow solid; mp 120–122 °C; <sup>1</sup>H NMR (400 MHz, CDCl<sub>3</sub>) δ 7.31 (d, *J* = 2.0 Hz, 2H), 7.27 (d, *J* = 2.4 Hz, 2H), 3.99–3.81 (m, 2H), 2.81–2.57 (m, 4H), 1.94–1.85 (m, 4H), 1.77–1.67 (m, 4H), 1.55–1.47 (m, 8H), 1.41 (s, 18H), 1.27 (s, 18H), 0.99 (t, *J* = 7.0 Hz, 6H). <sup>13</sup>C NMR (100 MHz, CDCl<sub>3</sub>) δ 175.0 (2C, Cq), 161.7 (2C, Cq), 137.5 (2C, Cq), 137.3 (2C, Cq), 126.7 (2C, Cq), 122.3 (2C, CH), 116.6 (2C, CH), 62.6 (2C, CH), 35.1 (2C, Cq), 34.1 (2C, Cq), 33.0 (2C, Cq), 31.5 (6C, CH<sub>3</sub>), 30.2 (2C, CH<sub>2</sub>), 29.6 (6C, CH<sub>3</sub>), 27.6 (2C, CH<sub>2</sub>), 24.2 (2C, CH<sub>2</sub>), 23.1 (2C, CH<sub>2</sub>), 13.7 (2C, CH<sub>3</sub>). **HRMS (ESI) *m/z*:** calcd for C<sub>44</sub>H<sub>71</sub>N<sub>2</sub>O<sub>2</sub> [M+H]<sup>+</sup> 659.5516, found 659.5532. **Optical Rotation:** [ $\alpha$ ]<sub>D</sub><sup>25</sup> = -273.5 (c = 1.0, CH<sub>2</sub>Cl<sub>2</sub>).

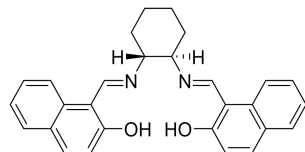

(1R,2R)-cyclohexane-1,2-diyl-bis(azanylylidene)-bis(methanylylidene)-bis(naphthalen-2-ol) (**L14**)

Yellow solid; mp 212–213 °C; <sup>1</sup>H NMR (600 MHz, CDCl<sub>3</sub>) δ 14.64 (brs, 2H), 8.77 (s, 2H), 7.73 (d, *J* = 8.4 Hz, 2H), 7.53 (d, *J* = 9.2 Hz, 2H), 7.46 (d, *J* = 7.8 Hz, 2H), 7.33–7.27 (m, 2H), 7.16–7.11 (m, 2H), 6.86 (d, *J* = 9.2 Hz, 2H), 3.46–3.40 (m, 2H), 2.23–2.17 (m, 2H), 1.98–2.191 (m, 2H), 1.82–1.74 (m, 2H), 1.55–1.47 (m, 2H). <sup>13</sup>C NMR (150 MHz, CDCl<sub>3</sub>) δ 172.1 (2C, Cq), 159.2 (2C, CH), 136.4 (2C, CH), 133.2 (2C, Cq), 128.8 (2C, CH), 127.8 (2C, CH), 126.5 (2C, Cq), 122.8 (2C, CH), 122.7 (2C, CH), 118.4 (2C, CH), 107.1 (2C, Cq), 69.1 (2C, CH), 32.7 (2C, CH<sub>2</sub>), 24.2 (2C, CH<sub>2</sub>). **HRMS (ESI) *m/z*:** calcd for C<sub>28</sub>H<sub>27</sub>N<sub>2</sub>O<sub>2</sub> [M+H]<sup>+</sup> 423.2067, found 423.2071. **Optical Rotation:** [ $\alpha$ ]<sub>D</sub><sup>25</sup> = -298.6 (c = 1.0, CH<sub>2</sub>Cl<sub>2</sub>).

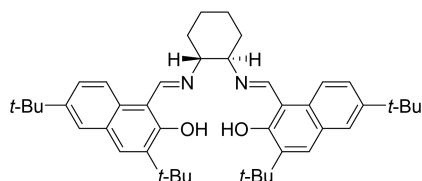

3,6-di-tert-butyl-1-((1R,2R)-2-((6-(tert-butyl)-2-hydroxy-3-methylnaphthalen-1-yl)methylene)amino)cyclohexyl)imino)methylnaphthalen-2-ol (**L15**)

Yellow solid; mp 160–162 °C; <sup>1</sup>H NMR (600 MHz, CDCl<sub>3</sub>) δ 8.66 (s, 2H), 7.45–7.40 (m, 4H, including d, *J* = 9.0 Hz, 2H and s, 2H), 7.27 (s, 2H), 7.16 (dd, *J* = 9.0, 2.4 Hz, 2H), 3.50–3.45 (m, 2H), 2.28–2.23 (m, 2H), 1.99–1.94 (m, 2H), 1.89–1.82 (m, 2H), 1.52–1.50 (m, 2H), 1.47 (s, 18H), 1.30 (s, 18H). <sup>13</sup>C NMR (100 MHz, CDCl<sub>3</sub>) δ 173.0 (2C, Cq), 159.5 (2C, CH), 144.8 (2C, Cq), 141.1 (2C, Cq), 132.6 (2C, CH), 130.2 (2C, Cq), 125.7 (2C, Cq), 125.3 (2C, CH), 124.0 (2C, CH), 117.0 (2C, CH), 106.9 (2C, Cq), 68.8 (2C, CH), 35.0 (2C, Cq), 34.2 (2C, Cq), 32.5 (2C, CH<sub>2</sub>), 31.3 (6C, CH<sub>3</sub>), 29.5 (6C, CH<sub>3</sub>), 24.4 (2C, CH<sub>2</sub>). **HRMS (ESI) *m/z*:** calcd for C<sub>44</sub>H<sub>59</sub>N<sub>2</sub>O<sub>2</sub> [M+H]<sup>+</sup> 647.4571, found 647.4600. **Optical Rotation:** [ $\alpha$ ]<sub>D</sub><sup>25</sup> = -359.2 (c = 1.0, CH<sub>2</sub>Cl<sub>2</sub>).

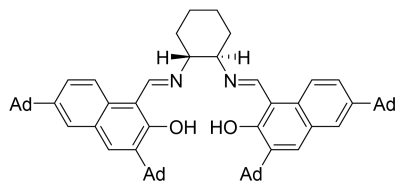

3,6-di-adamantyl-1-(1*R*,2*R*)-2-((6-(adamantyl)-2-hydroxy-3-methylnaphthalen-1-yl)methylene) amino)cyclohexyl imino methyl)naphthalen-2-ol (**L16**)

Yellow solid; mp 295–298 °C; <sup>1</sup>H NMR (400 MHz, CDCl<sub>3</sub>) δ 14.67 (s, 2H), 8.68 (s, 2H), 7.50 (d, *J* = 8.8 Hz, 2H), 7.35 (s, 2H), 7.25 (s, 2H), 7.20 (dd, *J* = 8.8, 2.0 Hz, 2H), 3.45–3.39 (m, 2H), 2.23–2.06 (m, 26H), 1.91–1.87 (m, 12H), 1.85–1.70 (m, 26H), 1.60–1.55 (m, 4H). <sup>13</sup>C NMR (100 MHz, CDCl<sub>3</sub>) δ 172.6 (2C, Cq), 159.8 (2C, CH), 145.2 (2C, Cq), 141.3 (2C, Cq), 133.0 (2C, Cq), 130.4 (2C, Cq), 126.3 (2C, CH), 124.8 (2C, CH), 124.2 (2C, CH), 117.4 (2C, CH), 107.3 (2C, Cq), 69.4 (2C, CH), 43.2 (4C, CH<sub>2</sub>), 40.7 (4C, CH<sub>2</sub>), 37.52 (2C, Cq), 37.48 (4C, CH<sub>2</sub>), 37.1 (8C, CH<sub>2</sub>), 35.9 (2C, CH<sub>2</sub>), 32.9 (4C, Cq), 29.3 (4C, CH), 29.0 (8C, CH), 24.7 (2C, CH<sub>2</sub>). **HRMS (ESI) *m/z***: calcd for C<sub>68</sub>H<sub>83</sub>N<sub>2</sub>O<sub>2</sub> [M+H]<sup>+</sup> 959.6449, found 959.6485. **Optical Rotation**: [α]<sub>D</sub><sup>25</sup> = -330.7 (c = 1.0, CH<sub>2</sub>Cl<sub>2</sub>).

## 7.2 Radical trapping product

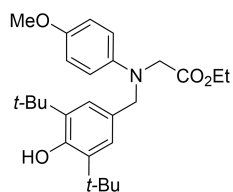

ethyl *N*-(3,5-di-*tert*-butyl-4-hydroxybenzyl)-*N*-(4-methoxyphenyl)glycinate (**2a-BHT**)<sup>[10]</sup>

Colorless oil; <sup>1</sup>H NMR (400 MHz, CDCl<sub>3</sub>) δ 7.07 (s, 2H), 6.81 (d, *J* = 9.2 Hz, 2H), 6.73 (d, *J* = 9.2 Hz, 2H), 4.47 (s, 2H), 4.17 (q, *J* = 7.0 Hz, 2H), 3.94 (s, 2H), 3.75 (s, 3H), 1.41 (s, 18H), 1.24 (t, *J* = 7.0 Hz, 3H).

### 7.3 Products

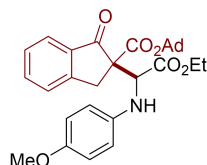

#### Adamantan-1-yl-2-(2-ethoxy-1-((4-methoxyphenyl)amino)-2-oxoethyl)-1-oxo-2,3-dihydro-1H-indene-2-carboxylate (**3aa**)

Colorless oil (90 mg, 87% yield); 90:10 *dr* (88:12 *dr*, **from aging**). <sup>1</sup>H NMR (600 MHz, CDCl<sub>3</sub>) δ 7.75 (d, *J* = 7.8 Hz, 1H), 7.61–7.57 (m, 1H), 7.47 (d, *J* = 7.2 Hz, 1H), 7.39–7.35 (m, 1H), 6.87–6.75 (m, 4H), 4.98 (s, 1H), 3.93–3.84 [m, 3H, including 3.90 (q, *J* = 7.2 Hz, 2H); 3.86 (d, *J* = 17.4 Hz, 1H)], 3.75 (s, 3H), 3.36 (d, *J* = 17.4 Hz, 1H), 2.14–2.01 (m, 9H), 1.62–1.56 (m, 6H), 0.89 (t, *J* = 7.2 Hz, 3H). <sup>13</sup>C NMR (150 MHz, CDCl<sub>3</sub>) δ 198.6 (Cq), 171.3 (Cq), 166.9 (Cq), 153.7 (Cq), 152.7 (Cq), 140.8 (Cq), 135.2 (CH), 127.7 (CH), 126.4 (CH), 124.6 (CH), 116.9 (2C, CH), 114.7 (2C, CH), 83.0 (Cq), 65.2 (Cq), 62.2 (CH), 61.6 (CH<sub>2</sub>), 55.7 (CH<sub>3</sub>), 40.9 (3C, CH<sub>2</sub>), 36.0 (3C, CH<sub>2</sub>), 33.4 (CH<sub>2</sub>), 30.8 (3C, CH), 13.6 (CH<sub>3</sub>). **HRMS (ESI)** *m/z*: calcd for NaC<sub>31</sub>H<sub>35</sub>NO<sub>6</sub> [M+Na]<sup>+</sup> 540.2357, found 540.2373.

**Optical Rotation:** [ $\alpha$ ]<sub>D</sub><sup>25</sup> = +82.7 (*c* = 1.0, CH<sub>2</sub>Cl<sub>2</sub>). The *ee* value was determined by **HPLC analysis** (only the major stereoisomers were considered): 97.7:2.3 *er* (94.7:5.3 *er*, **from aging**), Chiralcel AD-H column, hexane/*i*-PrOH = 90/10, flow rate = 1.0 mL/min,  $\lambda$  = 210 nm, retention time: *t*<sub>major</sub> = 19.6 min, *t*<sub>minor</sub> = 26.4 min; (*t*<sub>major</sub> = 19.8 min, *t*<sub>minor</sub> = 26.5 min, **from aging**).

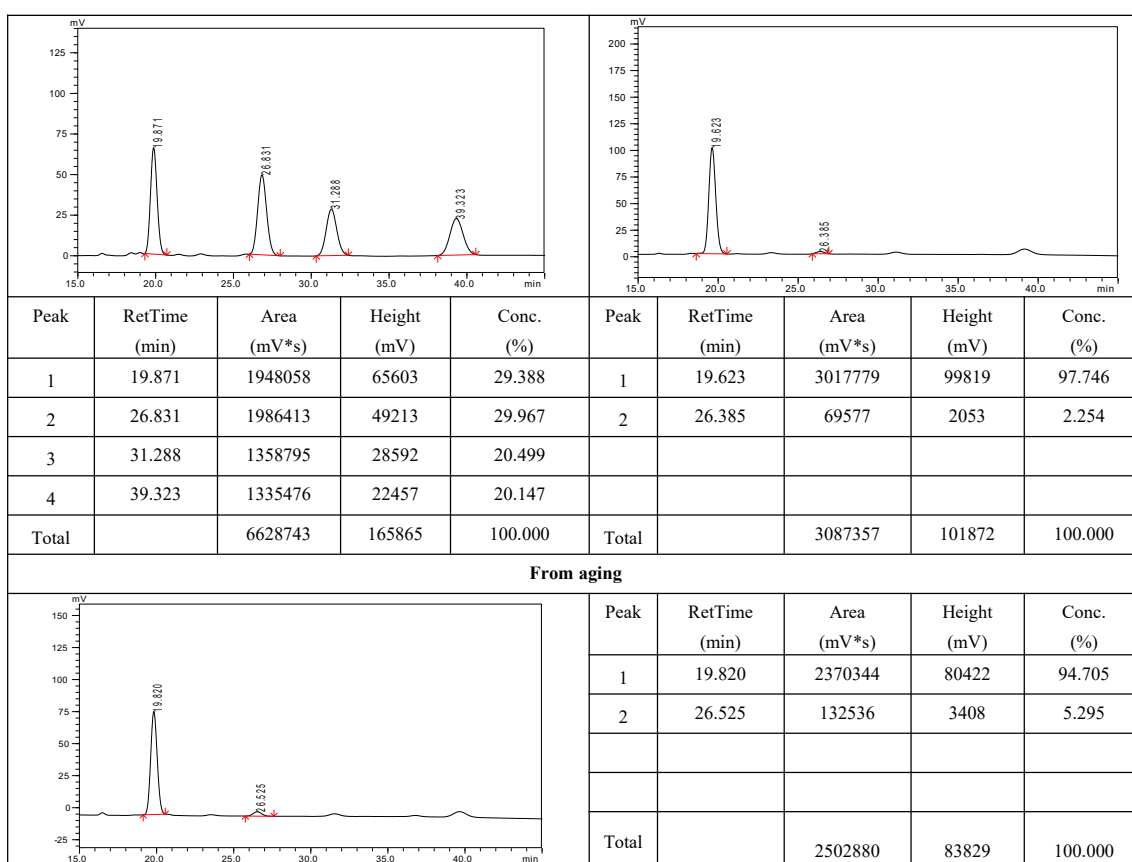



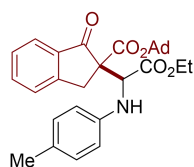

**Adamantan-1-yl-2-(2-ethoxy-2-oxo-1-(p-tolylamino)ethyl)-1-oxo-2,3-dihydro-1H-indene-2-carboxylate (3ab)**

Colorless oil (69 mg, 69% yield); 80:20 *dr* (70:30 *dr*, **from aging**). <sup>1</sup>H NMR (400 MHz, CDCl<sub>3</sub>) δ 7.75 (d, *J* = 7.6 Hz, 1H), 7.61–7.56 (m, 1H), 7.46 (d, *J* = 7.6 Hz, 1H), 7.39–7.34 (m, 1H), 7.01 (d, *J* = 8.0 Hz, 2H), 6.73 (d, *J* = 8.0 Hz, 2H), 5.05 (s, 1H), 3.91 (q, *J* = 7.2 Hz, 2H), 3.85 (d, *J* = 17.2 Hz, 1H), 3.25 (d, *J* = 17.2 Hz, 1H), 2.24 (s, 3H), 2.12–2.02 (m, 9H), 1.61–1.56 (m, 6H), 0.91 (t, *J* = 7.2 Hz, 3H). <sup>13</sup>C NMR (100 MHz, CDCl<sub>3</sub>) δ 198.8 (Cq), 171.5 (Cq), 167.0 (Cq), 152.7 (Cq), 145.1 (Cq), 135.4 (CH), 129.8 (2C, CH), 128.8 (CH), 127.8 (CH), 126.5 (CH), 124.7 (CH), 115.1 (2C, CH), 83.1 (Cq), 65.4 (Cq), 61.7 (CH), 61.3 (CH<sub>2</sub>), 41.0 (3C, CH<sub>2</sub>), 36.2 (3C, CH<sub>2</sub>), 33.6 (CH<sub>2</sub>), 30.9 (3C, CH), 20.6 (CH<sub>3</sub>), 13.8 (CH<sub>3</sub>). **HRMS (ESI) *m/z***: calcd for NaC<sub>31</sub>H<sub>35</sub>NO<sub>5</sub> [M+Na]<sup>+</sup> 524.2407, found 524.2389.

**Optical Rotation:** [α]<sub>D</sub><sup>25</sup> = +38.5 (c = 1.0, CH<sub>2</sub>Cl<sub>2</sub>). The *ee* value was determined by **HPLC analysis** (only the major stereoisomers were considered): 95.5:4.5 *er* (93.0:7.0 *er*, **from aging**), Chiralcel AD-H column, hexane/*i*-PrOH = 90/10, flow rate = 1.0 mL/min, λ = 210 nm, retention time: *t*<sub>major</sub> = 12.7 min, *t*<sub>minor</sub> = 19.6 min; (*t*<sub>major</sub> = 12.7 min, *t*<sub>minor</sub> = 19.7 min, **from aging**).

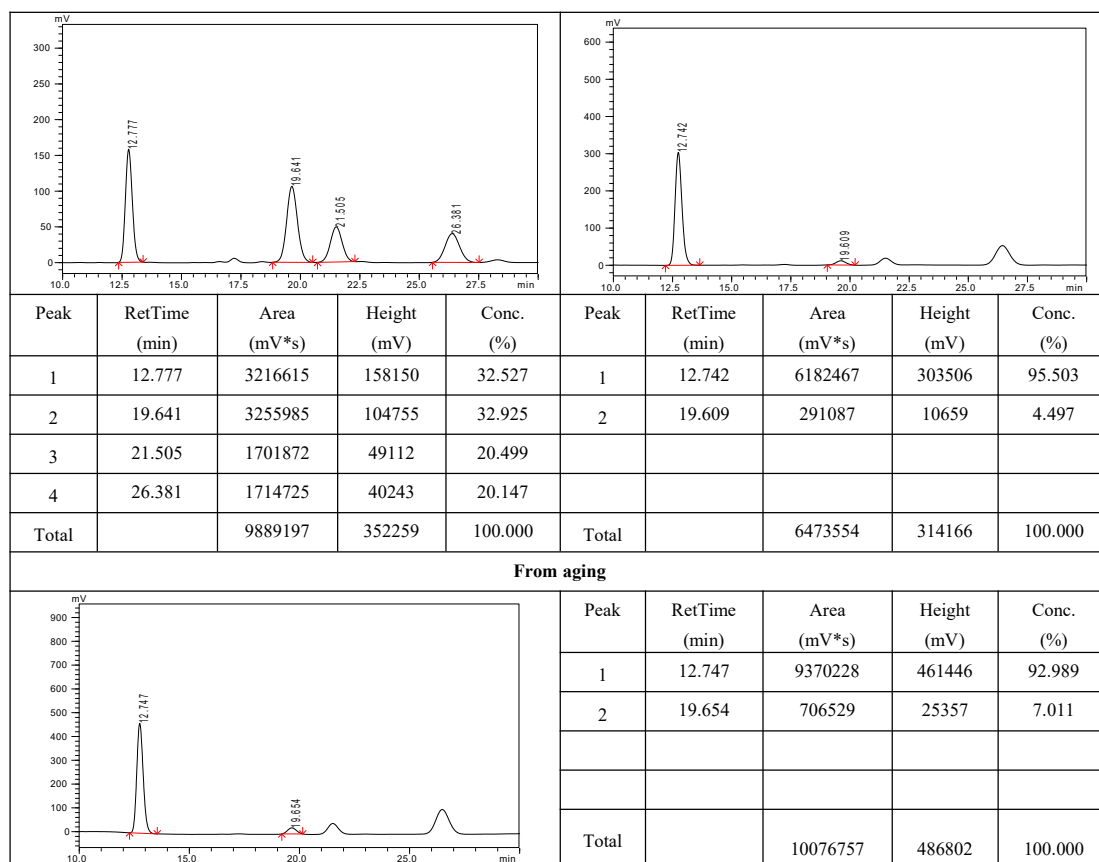

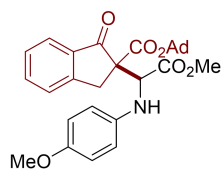

*Adamantan-1-yl-2-(2-methoxy-2-oxo-1-(p-tolylamino)ethyl)-1-oxo-2,3-dihydro-1H-indene-2-carboxylate (3ac)*

Colorless oil (89 mg, 88% yield); 92:8 *dr* (85:15 *dr*, **from aging**). <sup>1</sup>H NMR (400 MHz, CDCl<sub>3</sub>) δ 7.74 (d, *J* = 7.6 Hz, 1H), 7.62–7.57 (m, 1H), 7.48 (d, *J* = 7.6 Hz, 1H), 7.39–7.33 (m, 1H), 6.81–6.70 (m, 4H), 4.99 (s, 1H), 3.77–3.69 (m, 4H, including 3.73, s, 3H), 3.62 (s, 3H), 3.35–3.27 (m, 1H), 2.15–2.02 (m, 9H), 1.64–1.57 (m, 6H). <sup>13</sup>C NMR (100 MHz, CDCl<sub>3</sub>) δ 202.9 (Cq), 172.5 (Cq), 167.4 (Cq), 153.5 (Cq), 152.9 (Cq), 140.6 (Cq), 135.7 (Cq), 135.2 (CH), 127.7 (CH), 126.1 (CH), 124.7 (CH), 116.7 (2C, CH), 114.6 (2C, CH), 82.8 (Cq), 63.5 (Cq), 62.3 (CH), 55.6 (CH<sub>3</sub>), 52.2 (CH<sub>3</sub>), 40.9 (3C, CH<sub>2</sub>), 36.0 (3C, CH<sub>2</sub>), 33.8 (CH<sub>2</sub>), 30.8 (3C, CH). **HRMS (ESI)** *m/z*: calcd for NaC<sub>30</sub>H<sub>33</sub>NO<sub>6</sub> [M+Na]<sup>+</sup> 526.2200, found 526.2175.

**Optical Rotation:** [ $\alpha$ ]<sub>D</sub><sup>25</sup> = +69.1 (*c* = 1.0, CH<sub>2</sub>Cl<sub>2</sub>). The *ee* value was determined by **HPLC analysis** (only the major stereoisomers were considered): 94.4:5.6 *er* (93.1:6.9 *er*, **from aging**), Chiralcel AD-H column, hexane/*i*-PrOH = 85/15, flow rate = 1.0 mL/min,  $\lambda$  = 210 nm, retention time: *t*<sub>major</sub> = 17.4 min, *t*<sub>minor</sub> = 20.4 min; (*t*<sub>major</sub> = 16.6 min, *t*<sub>minor</sub> = 19.5 min, **from aging**).

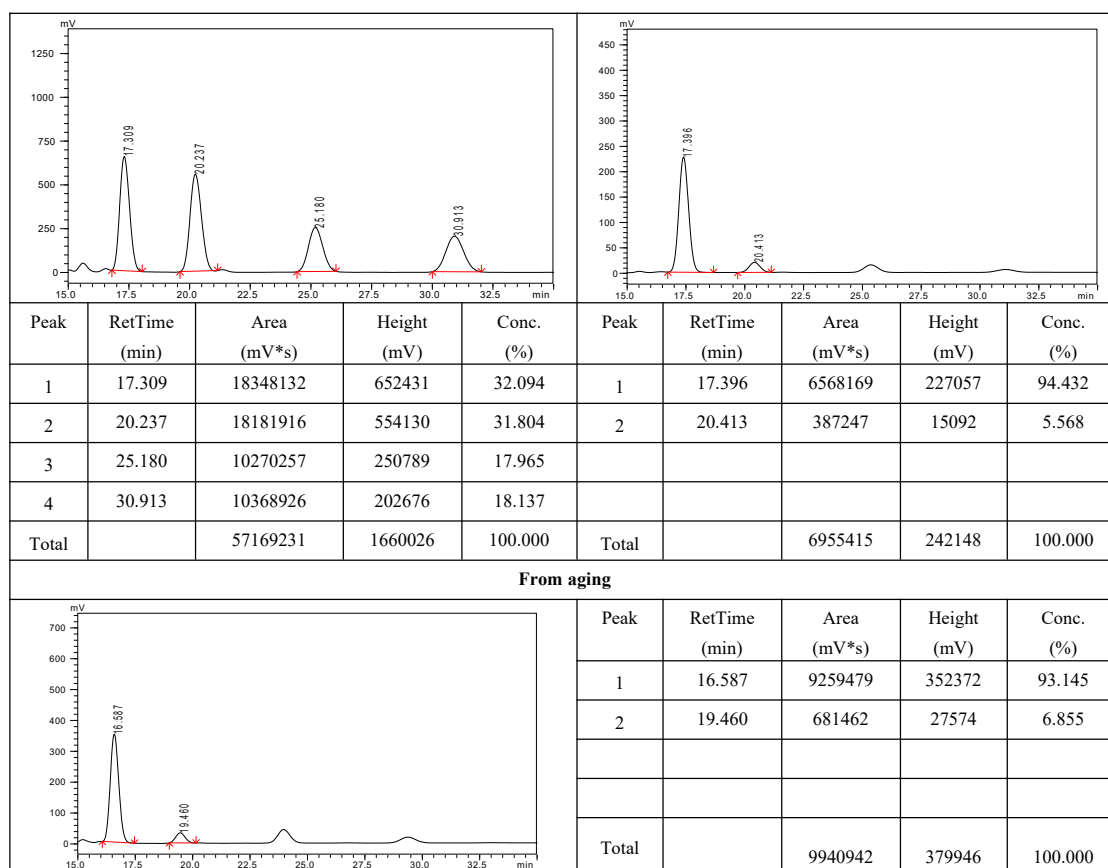

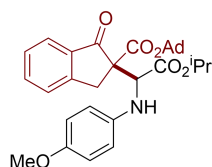

**Adamantan-1-yl-2-(2-isopropoxy-1-((4-methoxyphenyl)amino)-2-oxoethyl)-1-oxo-2,3-dihydro-1H-indene-2-carboxylate (3ad)**

Yellow oil (85 mg, 80% yield); 85:15 *dr*. **<sup>1</sup>H NMR** (500 MHz, CDCl<sub>3</sub>) [7.76 minor, 7.74 major] (d, *J* = 8.0 Hz, 1H), 7.61–7.56 (m, 1H), 7.47 (d, *J* = 7.5 Hz, 1H), 7.39–7.34 (m, 1H), 6.90–6.70 (m, 4H), 5.01–4.71 (m, 2H, including [4.99 minor, 4.93 major] (s, 1H)), [3.75 minor, 3.73 major] (s, 3H), 3.70 (d, *J* = 17.5 Hz, 1H), 3.30 (d, *J* = 17.5 Hz, 1H), 2.15–2.03 (m, 9H), 1.64–1.56 (m, 6H), 1.15–0.64 (m, 6H, including [1.11 (d, *J* = 6.0 Hz), 1.02 (d, *J* = 6.5 Hz)] major, [1.03 (d, *J* = 6.5 Hz), 0.67 (d, *J* = 6.0 Hz)] minor). **<sup>13</sup>C NMR** (125 MHz, CDCl<sub>3</sub>) δ [200.2 major, 198.4 minor] (Cq), 171.1 (Cq), [167.6 major, 166.0 minor] (Cq), 153.4 (Cq), 152.7 (Cq), [141.3 minor, 141.0 major] (Cq), 135.9 (Cq), 135.1 (CH), 127.7 (CH), 126.1 (CH), 124.7 (CH), [116.8 major, 116.6 minor] (2C, CH), 114.6 (2C, CH), [82.9 minor, 82.6 major] (Cq), [69.6 minor, 69.3 major] (Cq), [63.0 minor, 62.8 major] (CH), 60.3 (CH), 55.7 (CH<sub>3</sub>), 41.0 (3C, CH<sub>2</sub>), 36.1 (3C, CH<sub>2</sub>), 34.2 (CH<sub>2</sub>), 30.8 (3C, CH), 21.6 (CH<sub>3</sub>), 21.5 (CH<sub>3</sub>), 21.0 (CH<sub>3</sub>). **HRMS (ESI)** *m/z*: calcd for C<sub>32</sub>H<sub>38</sub>NO<sub>6</sub> [M+H]<sup>+</sup> 532.2694, found 532.2701.

**Optical Rotation:** [ $\alpha$ ]<sub>D</sub><sup>25</sup> = +118.2 (c = 1.0, CH<sub>2</sub>Cl<sub>2</sub>). The *ee* value was determined by **HPLC analysis** (only the major stereoisomers were considered): 97.1:2.9 *er*, Chiralcel AD-H column, hexane/*i*-PrOH = 90/10, flow rate = 1.0 mL/min,  $\lambda$  = 210 nm, retention time: *t*<sub>major</sub> = 17.3 min, *t*<sub>minor</sub> = 22.3 min.

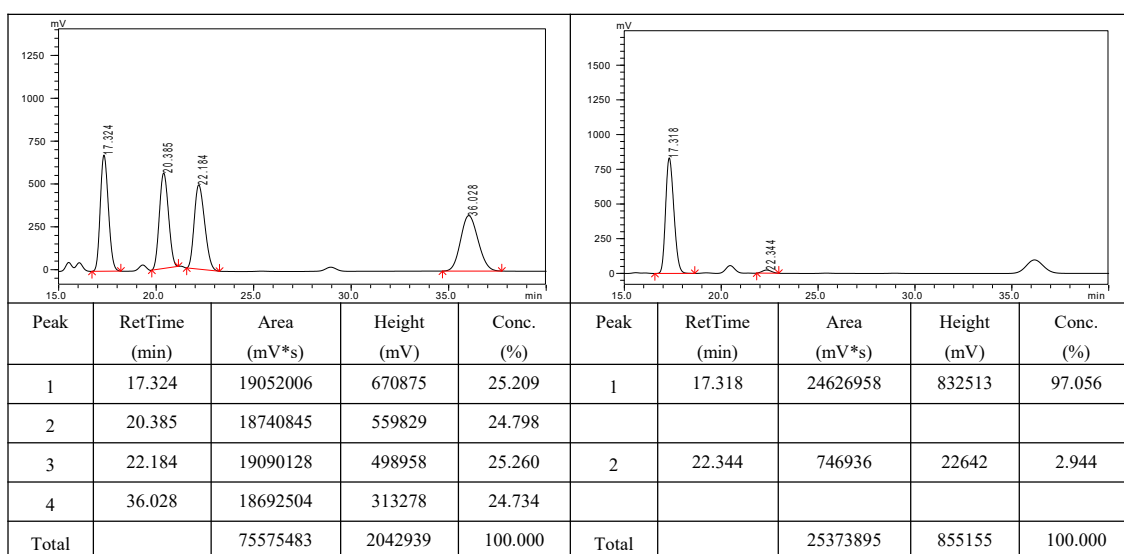

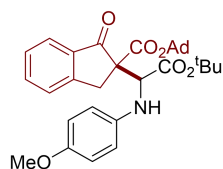

*Adamantan-1-yl-2-(2-(tert-butoxy)-1-((4-methoxyphenyl) amino)-2-oxoethyl)-1-oxo-2,3-dihydro-1H-indene-2-carboxylate (3ae)*

Yellow oil (73 mg, 67% yield); 85:15 *dr*. **<sup>1</sup>H NMR** (400 MHz, CDCl<sub>3</sub>) δ [7.78 minor, 7.74 major (d, *J* = 7.6 Hz, 1H), 7.62–7.56 (m, 1H), [7.51 minor, 7.47 major (d, *J* = 7.6 Hz, 1H), 7.41–7.34 (m, 1H), 6.90–6.71 (m, 4H), [4.97 minor, 4.83 major] (s, 1H), [3.76 minor, 3.73 major] (s, 3H), 3.69 (d, *J* = 17.6 Hz, 1H), 3.32 (d, *J* = 17.6 Hz, 1H), 2.17–2.00 (m, 9H), 1.63–1.56 (m, 6H), [1.23 major, 1.02 minor] (s, 9H). **<sup>13</sup>C NMR** (100 MHz, CDCl<sub>3</sub>) δ 200.5 (Cq), 170.6 (Cq), 167.8 (Cq), 153.2 (Cq), 152.7 (Cq), 141.1 (Cq), 136.0 (Cq), 135.1 (CH), 127.7 (CH), 126.1 (CH), 124.6 (CH), 116.7 (2C, CH), 114.5 (2C, CH), 82.6 (Cq), 82.4 (Cq), 63.5 (Cq), 62.7 (CH), 55.7 (CH<sub>3</sub>), 41.0 (3C, CH<sub>2</sub>), 36.0 (3C, CH<sub>2</sub>), 34.5 (CH<sub>2</sub>), 30.8 (3C, CH), [27.7 major, 27.4 minor] (3C, CH<sub>3</sub>). **HRMS (ESI)** *m/z*: calcd for NaC<sub>33</sub>H<sub>39</sub>NO<sub>6</sub> [M+Na]<sup>+</sup> 568.2670, found 568.2653.

**Optical Rotation:** [α]<sub>D</sub><sup>25</sup> = +91.2 (c = 1.0, CH<sub>2</sub>Cl<sub>2</sub>). The *ee* value was determined by **HPLC analysis** (only the major stereoisomers were considered) 96.7:3.3 *er*. Chiralcel AD-H column, hexane/*i*-PrOH = 90/10, flow rate = 1.0 mL/min, λ = 210 nm, retention time: *t*<sub>major</sub> = 17.6 min, *t*<sub>minor</sub> = 10.7 min.

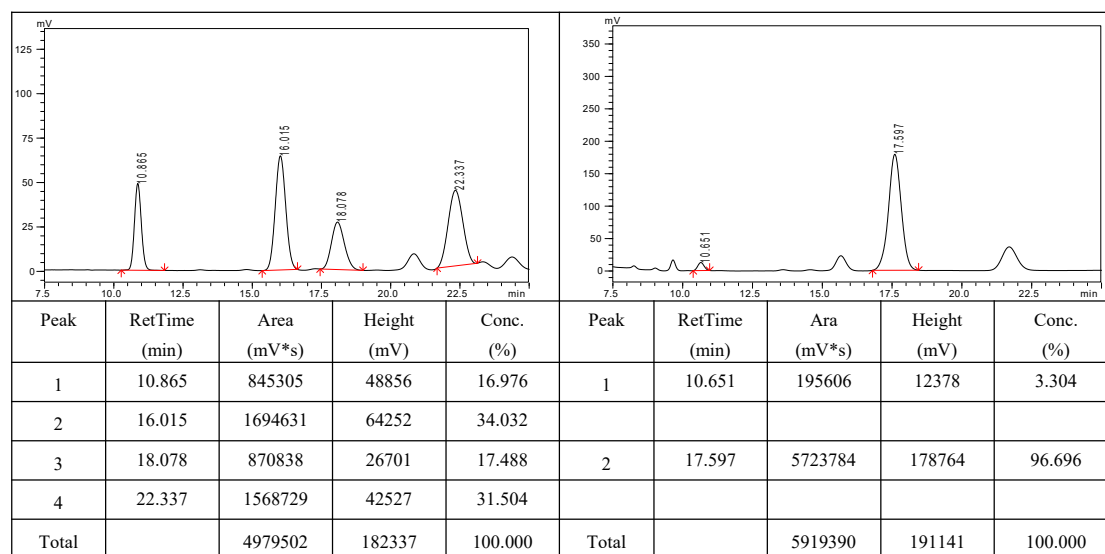

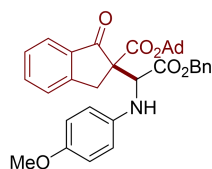

**Adamantan-1-yl-2-(2-(benzyloxy)-1-((4-methoxyphenyl)amino)-2-oxoethyl)-1-oxo-2,3-dihydro-1H-indene-2-carboxylate (3af)**

Colorless oil (105 mg, 90% yield); > 20:1 *dr* (85:15 *dr*, **from aging**). <sup>1</sup>H NMR (400 MHz, CDCl<sub>3</sub>) δ 7.71 (d, *J* = 7.6 Hz, 1H), 7.60–7.55 (m, 1H), 7.44 (d, *J* = 7.6 Hz, 1H), 7.39–7.26 (m, 4H), 7.20–7.13 (m, 2H), 6.85–6.63 (m, 4H), 5.16–4.92 (m, 3H, including 3.74, s, 1H), 3.74 (s, 3H), 3.68 (d, *J* = 17.6 Hz, 1H), 3.28 (d, *J* = 17.6 Hz, 1H), 2.09–1.92 (m, 9H), 1.59–1.54 (m, 6H). <sup>13</sup>C NMR (100 MHz, CDCl<sub>3</sub>) δ 200.1 (Cq), 171.8 (Cq), 167.4 (Cq), 153.5 (Cq), 152.8 (Cq), 140.7 (Cq), 135.7 (Cq), 135.2 (CH), 135.1 (Cq), 128.41 (2C, CH), 128.37 (2C, CH), 128.3 (CH), 127.7 (CH), 126.1 (CH), 124.7 (CH), 116.9 (2C, CH), 114.6 (2C, CH), 82.8 (Cq), 67.2 (CH<sub>2</sub>), 63.3 (Cq), 62.5 (CH<sub>2</sub>), 55.7 (CH<sub>3</sub>), 40.8 (3C, CH<sub>2</sub>), 36.0 (3C, CH<sub>2</sub>), 34.0 (CH<sub>2</sub>), 30.8 (3C, CH). **HRMS (ESI)** *m/z*: calcd for NaC<sub>36</sub>H<sub>37</sub>NO<sub>6</sub> [M+Na]<sup>+</sup> 602.2513, found 602.2496.

**Optical Rotation:** [α]<sub>D</sub><sup>25</sup> = +192.3 (*c* = 1.0, CH<sub>2</sub>Cl<sub>2</sub>). The *ee* value was determined by **HPLC analysis** (only the major stereoisomers were considered) 99.5:0.5 *er* (96.5:3.5 *er*, **from aging**). Chiralcel AD-H column, hexane/*i*-PrOH = 85/15, flow rate = 1.0 mL/min, λ = 210 nm, retention time: *t*<sub>major</sub> = 18.5 min, *t*<sub>minor</sub> = 26.0 min; (*t*<sub>major</sub> = 19.0 min, *t*<sub>minor</sub> = 25.9 min, **from aging**).

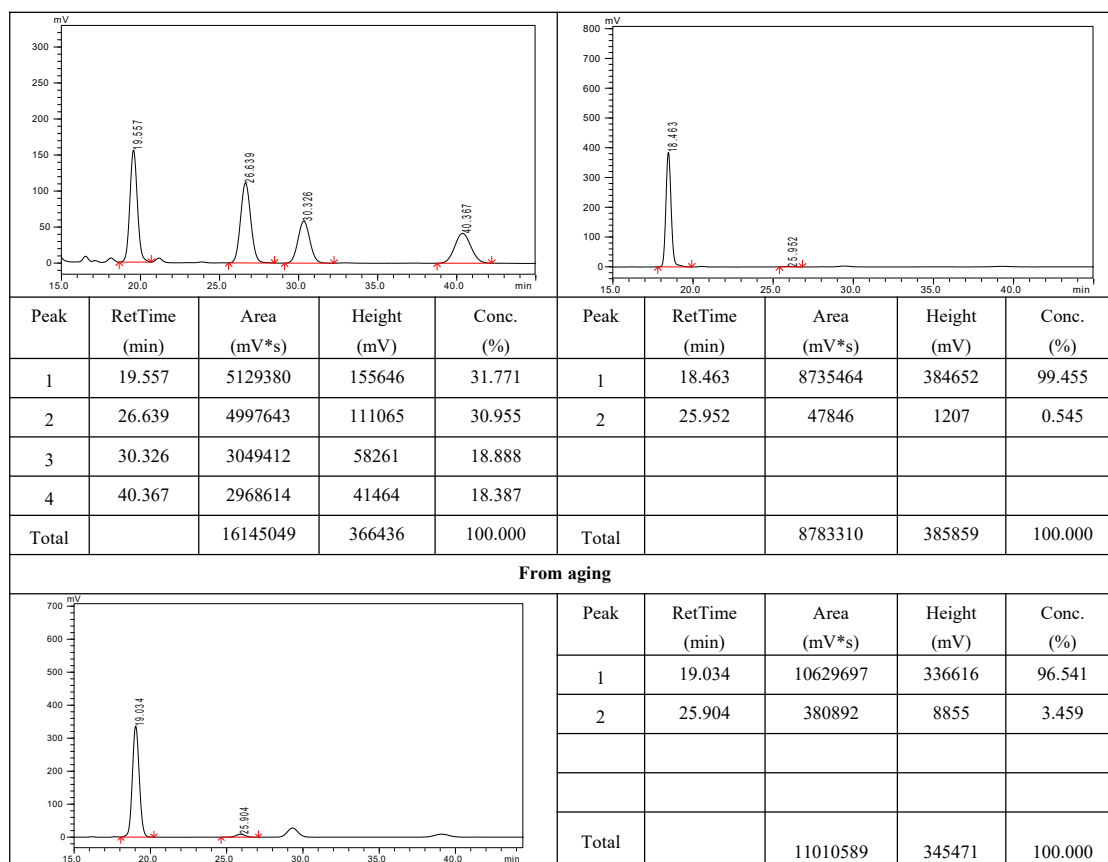

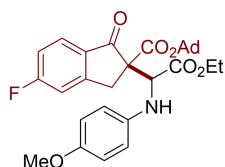

**Adamantan-1-yl-2-(2-ethoxy-1-((4-methoxyphenyl)amino)-2-oxoethyl)-5-fluoro-1-oxo-2,3-dihydro-1H-indene-2-carboxylate (3ba)**

Yellow oil (76 mg, 71% yield); 80:20 *dr* (72:28 *dr*, **from aging**). <sup>1</sup>H NMR (500 MHz, CDCl<sub>3</sub>) δ 7.78–7.71 (m, 1H), 7.16–7.11 (m, 1H), 7.09–7.03 (m, 1H), 6.81–6.72 (m, 4H), [4.98 minor, 4.97 major] (s, 1H), [(4.14–4.04) major, (3.95–3.92) minor] (m, 2H), 3.76–3.68 (m, 4H, including [3.75 minor, 3.72 major] (s, 3H)), [3.28 major, 3.23 minor] (d, *J* = 18.0 Hz, 1H), 2.15–2.02 (m, 9H), 1.63–1.58 (m, 6H), [1.14 major, 0.93 minor] (t, *J* = 7.0 Hz, 3H). <sup>13</sup>C NMR (125 MHz, CDCl<sub>3</sub>) δ [198.2 major, 196.8 minor] (Cq), [171.8 major, 171.4 minor] (Cq), 167.5 (d, *J*<sub>F</sub> = 227.5 Hz, Cq), [167.1 major, 166.4 minor] (Cq), 155.9 (Cq), [153.6 major, 153.5 minor] (Cq), 140.7 (Cq), 127.0 (d, *J*<sub>3</sub> = 10.0 Hz, CH), 123.6 (Cq), 116.9 (2C, CH), 116.0 (d, *J*<sub>2</sub> = 23.8 Hz, CH), 114.6 (2C, CH), 112.9 (d, *J*<sub>2</sub> = 22.5 Hz, CH), [83.2 minor, 82.9 major] (Cq), 65.7 (Cq), 63.9 (CH), [61.6 minor, 61.5 major] (CH<sub>2</sub>), 55.6 (CH<sub>3</sub>), 40.9 (3C, CH<sub>2</sub>), 36.0 (3C, CH<sub>2</sub>), [33.7 major, 33.3 minor] (CH<sub>2</sub>), 30.8 (3C, CH), [14.2 minor, 14.1 major] (CH<sub>3</sub>). <sup>19</sup>F NMR (470 MHz, CDCl<sub>3</sub>) δ -101.8. HRMS (ESI) *m/z*: calcd for C<sub>31</sub>H<sub>35</sub>NO<sub>6</sub>F [M+H]<sup>+</sup> 536.2443, found 536.2438.

**Optical Rotation:** [α]<sub>D</sub><sup>25</sup> = +26.9 (c = 1.0, CH<sub>2</sub>Cl<sub>2</sub>). The *ee* value was determined by HPLC analysis (only the major stereoisomers were considered) 95.0:5.0 *er* (92.7:7.3 *er*, **from aging**), Chiralcel AD-H column, hexane/*i*-PrOH = 90/10, flow rate = 1.0 mL/min, λ = 210 nm, retention time: *t*<sub>major</sub> = 25.3 min, *t*<sub>minor</sub> = 27.8 min; (*t*<sub>major</sub> = 25.3 min, *t*<sub>minor</sub> = 27.9 min, **from aging**).

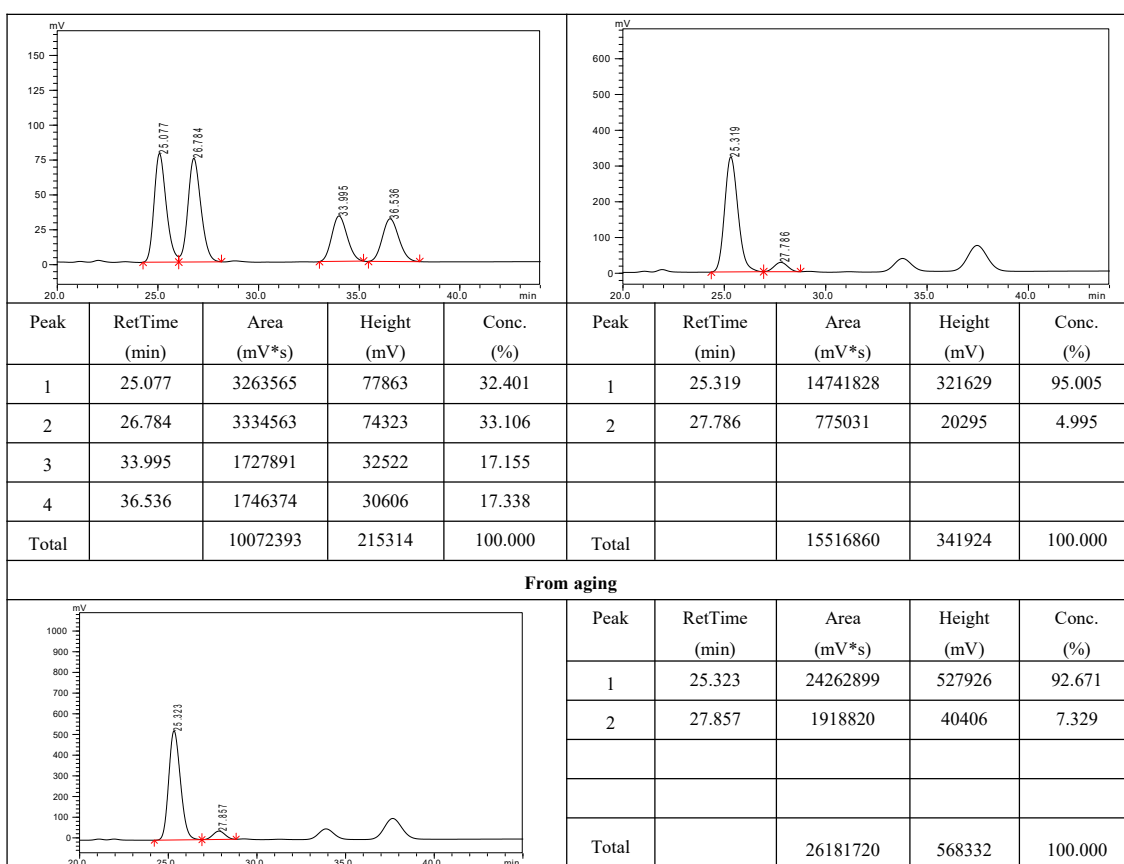

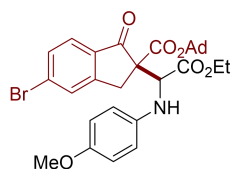

**Adamantan-1-yl-5-bromo-2-(2-ethoxy-1-((4-methoxyphenyl) amino)-2-oxoethyl)-1-oxo-2,3-dihydro-1H-indene-2-carboxylate (3ca)**

Yellow oil (88.8 mg, 75% yield); 88:12 *dr*. **<sup>1</sup>H NMR** (400 MHz, CDCl<sub>3</sub>) δ 7.68 (brs, 1H), 7.63 (d, *J* = 8.0 Hz, 1H), 7.54 (d, *J* = 8.0 Hz, 1H), 6.84–6.73 (m, 4H), 5.00 (s, 1H), 4.18–4.07 (m, 1H), 3.83–3.69 (m, 4H, including 3.71, s, 3H), 3.30 (d, *J* = 17.6 Hz, 1H), 2.24–1.99 (m, 9H), 1.65–1.60 (m, 6H), 1.16 (t, *J* = 7.2 Hz, 3H). **<sup>13</sup>C NMR** (100 MHz, CDCl<sub>3</sub>) δ 198.9 (Cq), 171.8 (Cq), 167.0 (Cq), 154.4 (Cq), 153.5 (Cq), 140.6 (Cq), 131.3 (CH), 129.7 (Cq), 129.4 (CH), 125.8 (CH), 116.8 (2C, CH), 114.5 (2C, CH), 83.0 (Cq), 66.7 (Cq), 63.7 (CH), 61.6 (CH<sub>2</sub>), 55.6 (CH<sub>3</sub>), 40.9 (3C, CH<sub>2</sub>), 36.0 (3C, CH<sub>2</sub>), 33.4 (CH<sub>2</sub>), 30.8 (3C, CH<sub>2</sub>), 14.1 (CH<sub>3</sub>). **HRMS (ESI)** *m/z*: calcd for C<sub>31</sub>H<sub>35</sub>NO<sub>6</sub><sup>79</sup>Br [M+H]<sup>+</sup> 596.1642, found 596.1666.

**Optical Rotation:** [ $\alpha$ ]<sub>D</sub><sup>25</sup> = +23.6 (*c* = 1.0, CH<sub>2</sub>Cl<sub>2</sub>). The *ee* value was determined by **HPLC analysis** (only the major stereoisomers were considered) 95.1:4.9 *er*, Chiralcel AD-H column, hexane/*i*-PrOH = 90/10, flow rate = 1.0 mL/min,  $\lambda$  = 210 nm, retention time: *t*<sub>major</sub> = 24.2 min, *t*<sub>minor</sub> = 25.2 min.

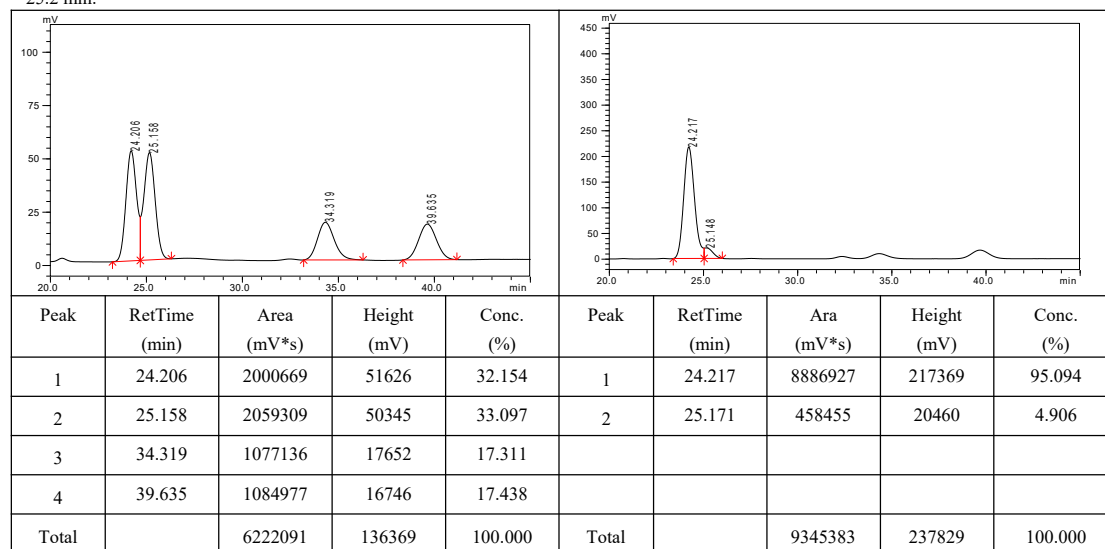

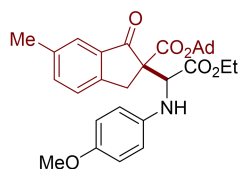

**Adamantan-1-yl-2-(2-ethoxy-1-((4-methoxyphenyl)amino)-2-oxoethyl)-6-methyl-1-oxo-2,3-dihydro-1H-indene-2-carboxylate (3da)**

Yellow oil (96 mg, 90% yield); 90:10 *dr*. <sup>1</sup>H NMR (500 MHz, CDCl<sub>3</sub>) δ 7.53 (s, 1H), 7.40 (d, *J* = 8.0 Hz, 1H), 7.37–7.35 (m, 1H), 6.81–6.71 (m, 4H), 4.95 (s, 1H), 3.80–3.64 (m, 4H, including 3.72, s, 3H), 3.25 (d, *J* = 17.5 Hz, 1H), 2.37 (s, 3H), 2.14–2.02 (m, 9H), 1.63–1.57 (m, 6H), 1.11 (t, *J* = 7.0 Hz, 3H). <sup>13</sup>C NMR (125 MHz, CDCl<sub>3</sub>) δ 200.2 (Cq), 171.8 (Cq), 167.6 (Cq), 153.4 (Cq), 150.2 (Cq), 141.3 (Cq), 140.9 (Cq), 136.4 (CH), 136.0 (Cq), 125.7 (CH), 124.6 (CH), 116.7 (2C, CH), 114.6 (2C, CH), 82.6 (Cq), 65.6 (Cq), 62.6 (CH), 61.4 (CH<sub>2</sub>), 55.6 (CH<sub>3</sub>), 40.9 (3C, CH<sub>2</sub>), 36.0 (3C, CH<sub>2</sub>), 33.6 (CH<sub>2</sub>), 30.8 (3C, CH), 21.0 (CH<sub>3</sub>), 14.0 (CH<sub>3</sub>). **HRMS (ESI) *m/z***: calcd for C<sub>32</sub>H<sub>38</sub>NO<sub>6</sub> [M+H]<sup>+</sup> 532.2694, found 532.2681.

**Optical Rotation:** [ $\alpha$ ]<sub>D</sub><sup>25</sup> = +38.5 (*c* = 1.0, CH<sub>2</sub>Cl<sub>2</sub>). The *ee* value was determined by **HPLC analysis** (only the major stereoisomers were considered) 96.2:3.8 *er*, Chiralcel AD-H column, hexane/*i*-PrOH = 90/10, flow rate = 1.0 mL/min,  $\lambda$  = 210 nm, retention time: *t*<sub>major</sub> = 17.9 min, *t*<sub>minor</sub> = 23.3 min.

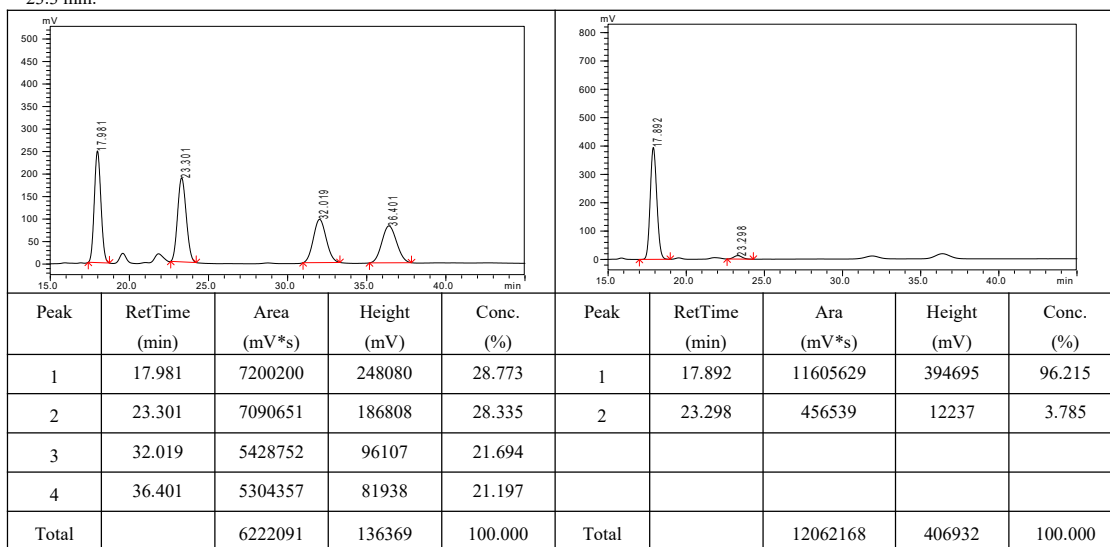



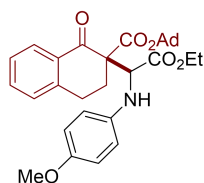

*Adamantan-1-yl-2-(2-ethoxy-1-((4-methoxyphenyl)amino)-2-oxoethyl)-1-oxo-1,2,3,4-tetrahydronaphthalene-2-carboxylate (3ea)*

Yellow oil (101 mg, 95% yield); 88:12 *dr*. **<sup>1</sup>H NMR** (400 MHz, CDCl<sub>3</sub>) δ 8.00 (d, *J* = 8.0 Hz, 1H), 7.51–7.42 (m, 1H), 7.33–7.27 (m, 1H), 7.24–7.18 (m, 1H), 6.81–6.62 (m, 4H), 4.38 (s, 1H), 4.25 (q, *J* = 7.2, 7.0 Hz, 2H), 3.74 (s, 3H), 3.18–2.92 (m, 2H), 2.85–2.68 (m, 1H), 2.62–2.46 (m, 1H), 2.16–1.90 (m, 8H), 1.64–1.51 (m, 7H), 1.26 (t, *J* = 7.2, 7.0 Hz, 3H). **<sup>13</sup>C NMR** (100 MHz, CDCl<sub>3</sub>) δ 197.2 (Cq), 172.1 (Cq), 169.7 (Cq), 153.0 (Cq), 142.6 (Cq), 142.5 (Cq), 138.6 (Cq), 133.3 (CH), 128.5 (CH), 127.5 (CH), 126.7 (CH), 115.7 (2C, CH), 114.8 (2C, CH), 82.7 (Cq), 63.7 (Cq), 62.4 (CH), 61.5 (CH<sub>2</sub>), 55.7 (CH<sub>3</sub>), 41.1 (3C, CH<sub>2</sub>), 36.0 (3C, CH<sub>2</sub>), 32.4 (CH<sub>2</sub>), 30.8 (3C, CH), 26.0 (CH<sub>2</sub>), 14.2 (CH<sub>3</sub>). **HRMS (ESI)** *m/z*: calcd for NaC<sub>32</sub>H<sub>37</sub>NO<sub>6</sub> [M+Na]<sup>+</sup> 554.2513, found 554.2486.

**Optical Rotation:** [ $\alpha$ ]<sub>D</sub><sup>25</sup> = -276.3 (*c* = 1.0, CH<sub>2</sub>Cl<sub>2</sub>). The *ee* value was determined by **HPLC analysis** (only the major stereoisomers were considered) 98.0:2.0 *er*, Chiralcel AD-H column, hexane/*i*-PrOH = 85/15, flow rate = 1.0 mL/min,  $\lambda$  = 210 nm, retention time: *t*<sub>major</sub> = 10.1 min, *t*<sub>minor</sub> = 25.2 min.

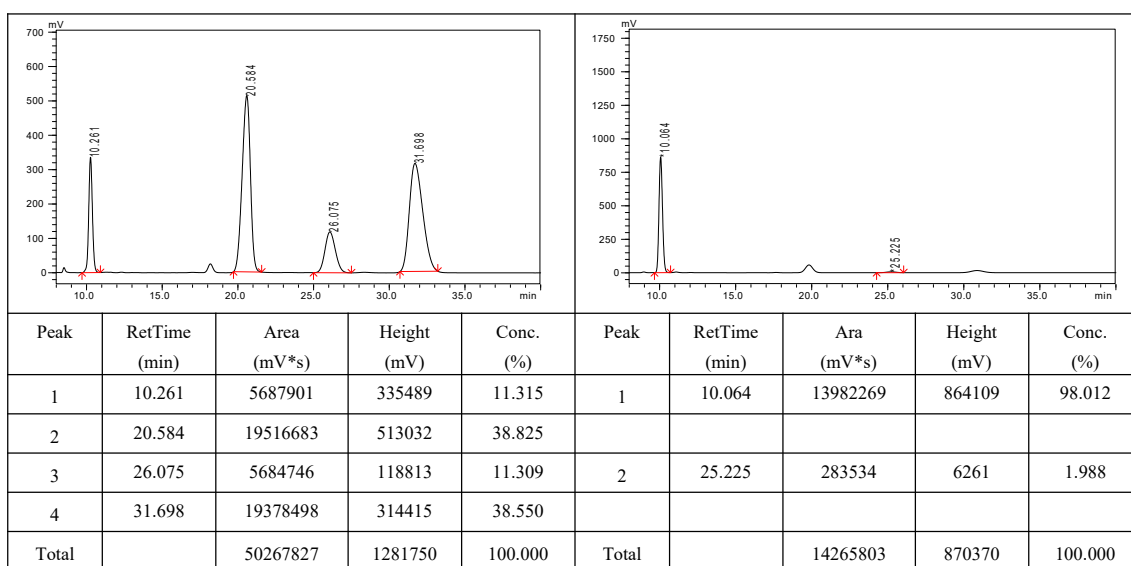

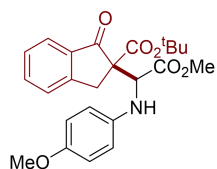

*Tert-butyl-2-(2-methoxy-1-((4-methoxyphenyl)amino)-2-oxoethyl)-1-oxo-2,3-dihydro-1H-indene-2-carboxylate (3fc)*

Pale yellow oil (72.3 mg, 85% yield); 94:6 *dr*. <sup>1</sup>H NMR (400 MHz, CDCl<sub>3</sub>) δ 7.74 (d, *J* = 7.6 Hz, 1H), 7.62–7.56 (m, 1H), 7.50–7.46 (m, 1H), 7.37 (d, *J* = 6.8 Hz, 1H), 6.82–6.70 (m, 4H), 5.0 (s, 1H), 3.82–3.76 (m, 1H), 3.72 (s, 1H), [3.61, 3.45] (s, 1H), 3.33 (d, *J* = 17.6, 1H), [1.41, 1.39] (s, 9H). <sup>13</sup>C NMR (100 MHz, CDCl<sub>3</sub>) δ 200.0 (Cq), 172.4 (Cq), 167.7 (Cq), 153.5 (Cq), 152.8 (Cq), 140.6 (Cq), 135.6 (Cq), 135.2 (CH), 127.7 (CH), 126.1 (CH), 124.7 (CH), 116.7 (2C, CH), 114.6 (2C, CH), 82.7 (Cq), 63.4 (Cq), 62.3 (CH), 55.6 (CH<sub>3</sub>), 55.2 (CH<sub>3</sub>), 33.7 (CH<sub>2</sub>), 27.7 (3C, CH<sub>3</sub>).

**HRMS (ESI) *m/z***: calcd for C<sub>24</sub>H<sub>28</sub>NO<sub>6</sub> [M+H]<sup>+</sup> 426.1911, found 426.1920.

**Optical Rotation:** [α]<sub>D</sub><sup>25</sup> = + 25.3 (c = 1.0, CH<sub>2</sub>Cl<sub>2</sub>). The *ee* value was determined by **HPLC analysis** (only the major stereoisomers were considered) 97.1:2.9 *er*, Chiralcel AD-H column, hexane/*i*-PrOH = 90/10, flow rate = 1.0 mL/min, λ = 210 nm, retention time: *t*<sub>major</sub> = 6.6 min, *t*<sub>minor</sub> = 12.5 min.

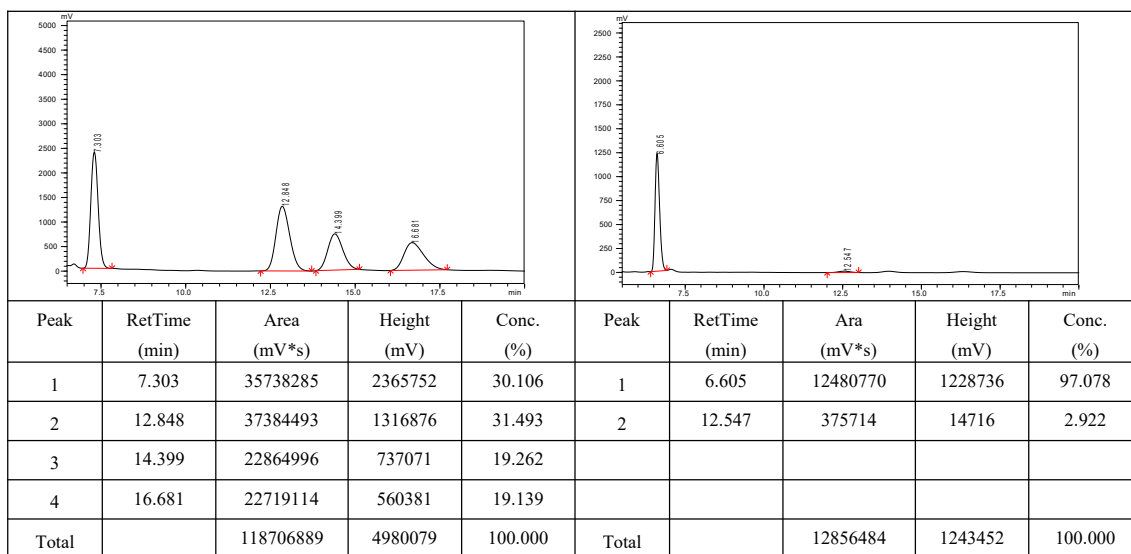

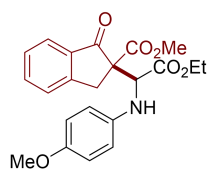

*Methyl-2-(2-ethoxy-1-((4-methoxyphenyl)amino)-2-oxoethyl)-1-oxo-2,3-dihydro-1H-indene-2-carboxylate (3f'a)*

Yellow oil (69.1 mg, 87% yield); 70:30 *dr*. <sup>1</sup>H NMR (500 MHz, CDCl<sub>3</sub>) δ [7.78 minor, 7.75 major] (d, *J* = 8.0, 7.5 Hz, 1H), 7.63–7.59 (m, 1H), 7.51–7.46 (m, 1H), 7.41–7.35 (m, 1H), 6.87–6.69 (m, 4H), [5.04 major, 5.01 minor] (s, 1H), [4.12–4.04 major, 3.92–3.88 minor] (m, 2H), 3.74 (s, 3H), [3.73 minor, 3.72 major] (s, 3H), [3.33 major, 3.31 minor] (d, *J* = 17.5 Hz, 1H), [1.12 major, 0.89 minor] (t, *J* = 7.5, 7.0 Hz, 3H). <sup>13</sup>C NMR (125 MHz, CDCl<sub>3</sub>) δ 199.3 (Cq), 171.7 (Cq), 169.3 (Cq), 153.7 (Cq), 152.7 (Cq), 141.0 (Cq), 140.6 (Cq), 135.4 (CH), 127.8 (CH), [126.4 minor, 126.2 major] (CH), [124.9 major, 124.7 minor] (CH), [117.2 major, 116.9 minor] (2C, CH), [114.7 major, 114.6 minor] (2C, CH), [62.9 major, 62.8 minor] (CH), 62.6 (Cq), [61.7 minor, 61.6 major] (CH<sub>2</sub>), 55.6 (CH<sub>3</sub>), [53.2 minor, 53.1 major] (CH<sub>3</sub>), [33.5 minor, 33.4 major] (CH<sub>2</sub>), [14.0 major, 13.6 minor] (CH<sub>3</sub>). HRMS (ESI) *m/z*: calcd for C<sub>22</sub>H<sub>24</sub>NO<sub>6</sub> [M+H]<sup>+</sup> 398.1604, found 398.1594.

**Optical Rotation:** n.d. The *ee* value was determined by HPLC analysis (only the major stereoisomers were considered) 50.2:49.8 *er*, Chiralcel AD-H column, hexane/*i*-PrOH = 85/15, flow rate = 1.0 mL/min, λ = 210 nm, retention time: *t*<sub>major</sub> = 21.0 min, *t*<sub>minor</sub> = 24.7 min.

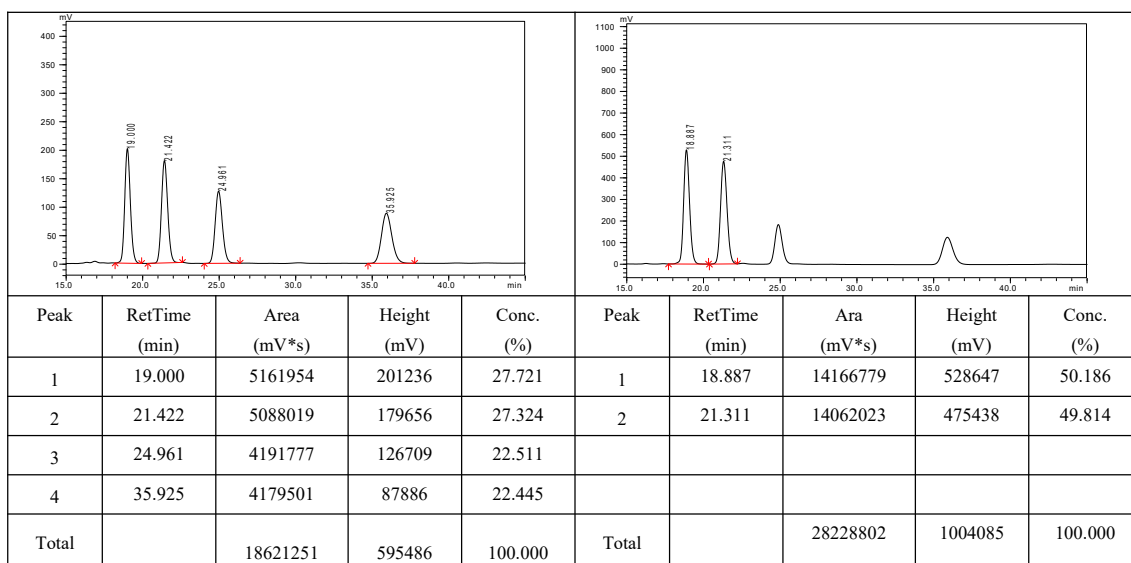

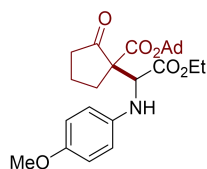

**Adamantan-1-yl-1-(2-ethoxy-1-((4-methoxyphenyl)amino)-2-oxoethyl)-2-oxocyclopentane-1-carboxylate (3ga)**

Yellow oil (73 mg, 78% yield); > 20:1 *dr*. <sup>1</sup>H NMR (500 MHz, CDCl<sub>3</sub>) δ 6.81–6.72 (m, 4H), 4.60 (s, 1H), 4.23–4.11 (m, 2H), 3.74 (s, 3H), 2.53–2.40 (m, 2H), 2.30–2.19 (m, 2H), 2.15–2.06 (m, 9H), 2.01–1.95 (m, 2H), 1.66–1.62 (m, 6H), 1.23 (t, *J* = 7.0 Hz, 3H). <sup>13</sup>C NMR (125 MHz, CDCl<sub>3</sub>) δ 212.1 (Cq), 171.4 (Cq), 168.4 (Cq), 153.5 (Cq), 141.1 (Cq), 116.7 (CH), 116.3 (CH), 114.7 (2C, CH), 82.9 (Cq), 65.3 (Cq), 61.8 (CH), 61.2 (CH<sub>2</sub>), 55.7 (CH<sub>3</sub>), 41.1 (3C, CH<sub>2</sub>), 37.5 (CH<sub>2</sub>), 36.1 (3C, CH<sub>2</sub>), 31.4 (CH<sub>2</sub>), 30.8 (3C, CH), 19.3 (CH<sub>2</sub>), 14.1 (CH<sub>3</sub>). HRMS (ESI) *m/z*: calcd for C<sub>27</sub>H<sub>36</sub>NO<sub>6</sub> [M+H]<sup>+</sup> 470.2537, found 470.2553.

**Optical Rotation:** [α]<sub>D</sub><sup>25</sup> = +41.7 (c = 1.0, CH<sub>2</sub>Cl<sub>2</sub>). The *ee* value was determined by HPLC analysis (only the major stereoisomers were considered) 99.8:0.2 *er*, Chiralcel AD-H column, hexane/*i*-PrOH = 95/5, flow rate = 1.0 mL/min, λ = 210 nm, retention time: *t*<sub>major</sub> = 18.8 min, *t*<sub>minor</sub> = 26.5 min.

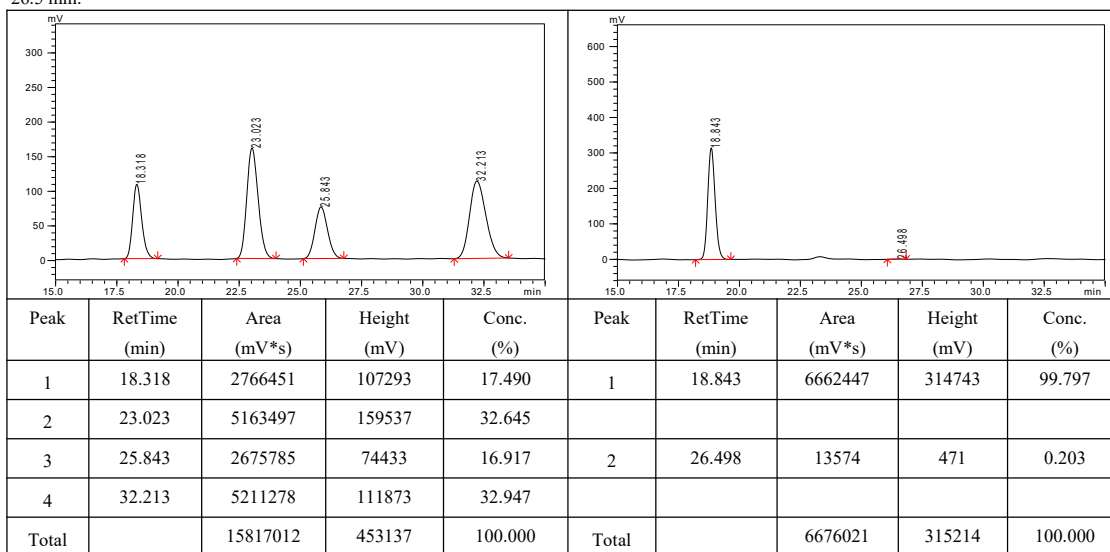

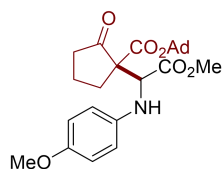

*Adamantan-1-yl-1-(2-methoxy-1-((4-methoxyphenyl)amino)-2-oxoethyl)-2-oxocyclopentane-1-carboxylate (3gc)*

Yellow oil (76 mg, 83% yield); > 20:1 *dr* (95:5 *dr*, **from aging**). <sup>1</sup>H NMR (500 MHz, CDCl<sub>3</sub>) δ 6.76 (brs, 4H), 4.65 (s, 1H), 3.74 (s, 3H), 3.65 (s, 3H), 2.50–2.39 (m, 2H), 2.28–2.23 (m, 2H), 2.20–2.05 (m, 9H), 1.94–1.79 (m, 2H), 1.67–1.60 (m, 6H). <sup>13</sup>C NMR (125 MHz, CDCl<sub>3</sub>) δ 213.0 (Cq), 172.2 (Cq), 168.0 (Cq), 153.5 (Cq), 140.6 (C), 116.6 (2C, CH), 114.7 (2C, CH), 82.8 (Cq), 62.9 (Cq), 62.1 (CH), 55.7 (CH<sub>3</sub>), 52.2 (CH<sub>3</sub>), 41.0 (3C, CH), 38.1 (CH<sub>2</sub>), 36.0 (3C, CH), 30.8 (3C, CH), 27.5 (CH<sub>2</sub>), 19.8 (CH<sub>3</sub>). HRMS (ESI) *m/z*: calcd for C<sub>26</sub>H<sub>34</sub>NO<sub>6</sub> [M+H]<sup>+</sup> 456.2381, found 456.2394.

**Optical Rotation:** [ $\alpha$ ]<sub>D</sub><sup>25</sup> = +25.5 (c = 1.0, CH<sub>2</sub>Cl<sub>2</sub>). The *ee* value was determined by HPLC analysis (only the major stereoisomers were considered) 99.5:0.5 *er* (95.6:4.4 *er*, **from aging**), Chiralcel AD-H column, hexane/*i*-PrOH = 90/10, flow rate = 1.0 mL/min,  $\lambda$  = 210 nm, retention time: *t*<sub>major</sub> = 13.6 min, *t*<sub>minor</sub> = 15.5 min; (*t*<sub>major</sub> = 12.6 min, *t*<sub>minor</sub> = 15.5 min, **from aging**).

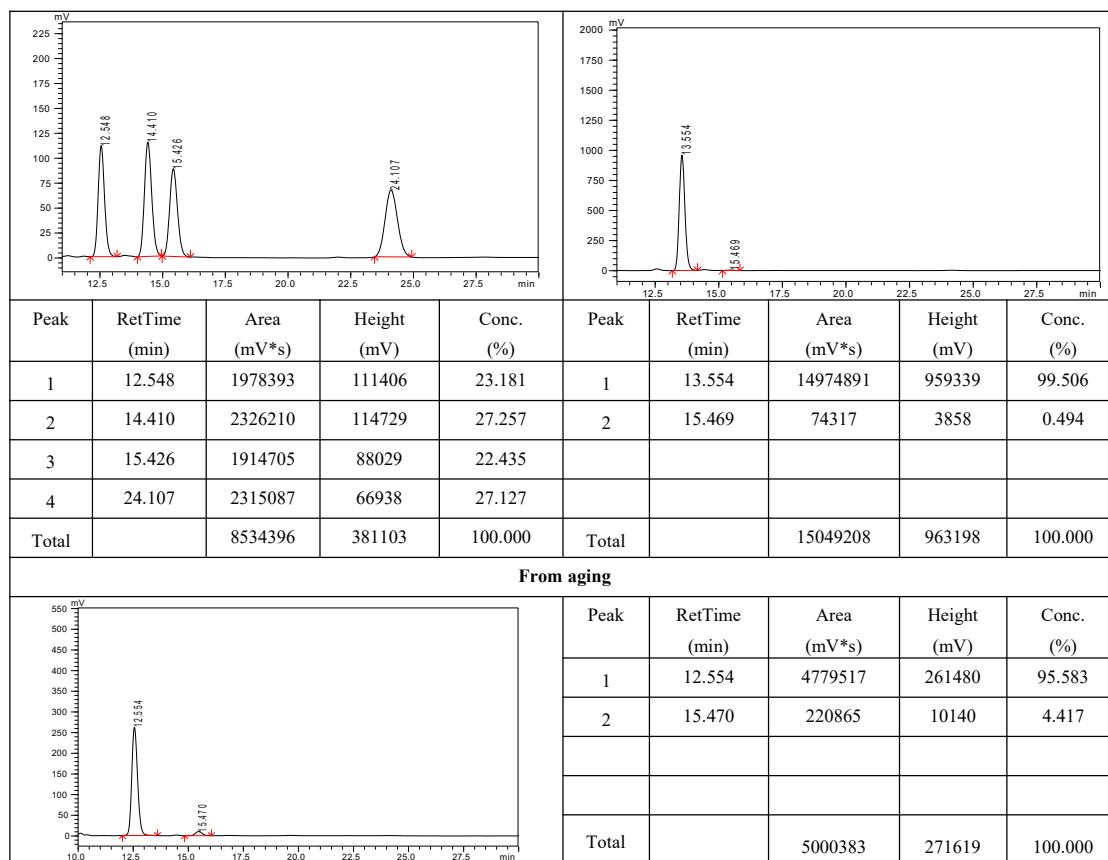

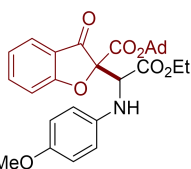

**Adamantan-1-yl-2-(2-ethoxy-1-((4-methoxyphenyl)amino)-2-oxoethyl)-3-oxo-2,3-dihydrobenzofuran-2-carboxylate (3ha)**

Pale yellow oil (88.3 mg, 85% yield); >20:1 *dr* (93:7 *dr*, **from aging**). <sup>1</sup>H NMR (400 MHz, CDCl<sub>3</sub>) δ 7.69 (d, *J* = 7.6 Hz, 1H), 7.66–7.59 (m, 1H), 7.25–7.19 (m, 1H), 7.17–7.09 (m, 1H), 6.89–6.74 (m, 4H), 5.06 (s, 1H), 4.32 (brs, 1H), 3.91–3.78 (m, 2H), 3.75 (s, 3H), 2.15–2.00 (m, 9H), 1.63–1.51 (m, 6H), 0.74 (t, *J* = 7.0 Hz, 3H). <sup>13</sup>C NMR (100 MHz, CDCl<sub>3</sub>) δ 192.2 (Cq), 171.6 (Cq), 168.7 (Cq), 161.8 (Cq), 153.6 (Cq), 140.7 (Cq), 138.1 (CH), 124.8 (CH), 122.8 (CH), 120.3 (Cq), 116.7 (2C, CH), 114.6 (2C, CH), 113.4 (CH), 93.0 (Cq), 84.6 (Cq), 62.3 (CH), 61.7 (CH<sub>2</sub>), 55.6 (CH<sub>3</sub>), 40.8 (3C, CH<sub>2</sub>), 35.9 (3C, CH<sub>2</sub>), 30.9 (3C, CH), 13.4 (CH<sub>3</sub>). **HRMS (ESI)** *m/z*: calcd for C<sub>30</sub>H<sub>34</sub>NO<sub>7</sub> [M+H]<sup>+</sup> 520.2335, found 520.2332.

**Optical Rotation:** [ $\alpha$ ]<sub>D</sub><sup>25</sup> = + 63.5 (*c* = 1.0, CH<sub>2</sub>Cl<sub>2</sub>). The *ee* value was determined by **HPLC analysis** (only the major stereoisomers were considered) 98.2: 1.8 *er* (94.8:5.2 *er*, **from aging**), Chiralcel AD-H column, hexane/*i*-PrOH = 90/10, flow rate = 1.0 mL/min,  $\lambda$  = 254 nm, retention time: *t*<sub>major</sub> = 28.5 min, *t*<sub>minor</sub> = 48.7 min; (*t*<sub>major</sub> = 28.5 min, *t*<sub>minor</sub> = 48.6 min, **from aging**).

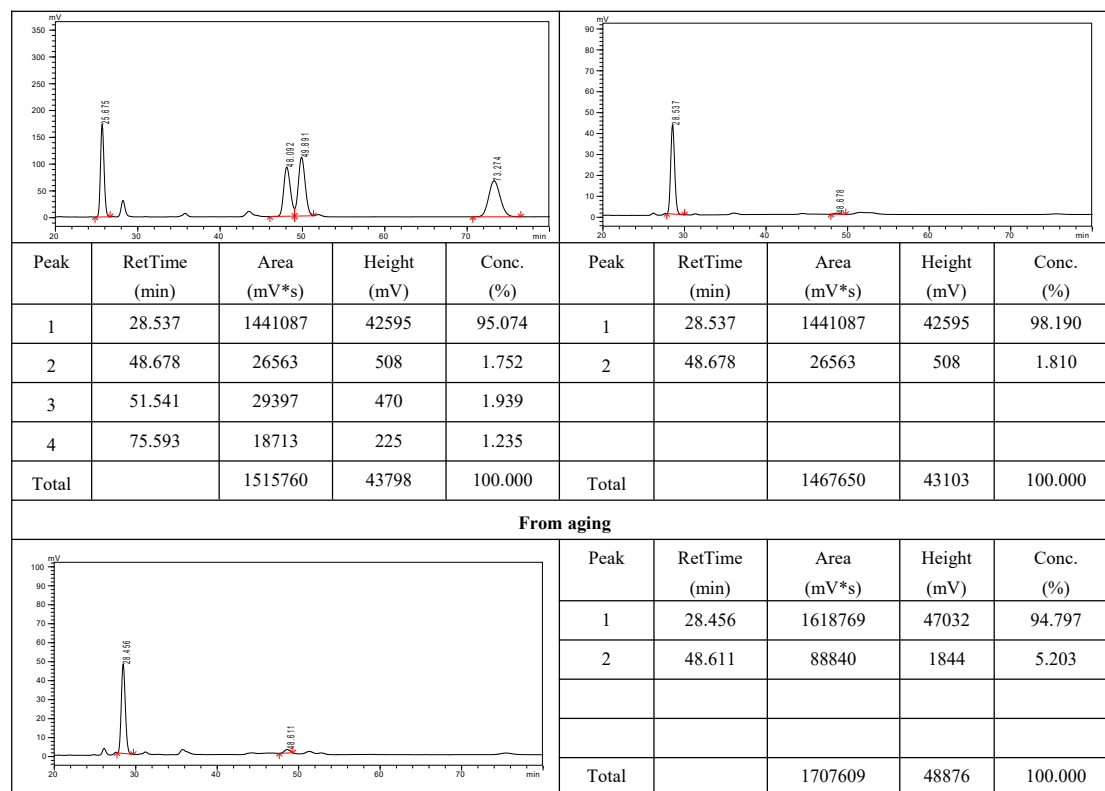

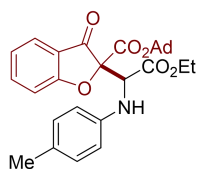

*Adamantan-1-yl-2-((S)-2-ethoxy-2-oxo-1-(p-tolylamino)ethyl)-3-oxo-2,3-dihydrobenzofuran-2-carboxylate (3hb)*

Pale yellow oil (70.5 mg, 70% yield); > 20:1 *dr*. <sup>1</sup>H NMR (600 MHz, CDCl<sub>3</sub>) δ 7.70 (d, *J* = 7.8 Hz, 1H), 7.65–7.62 (m, 1H), 7.23 (d, *J* = 8.4 Hz, 1H), 7.16–7.12 (m, 1H), 7.03 (d, *J* = 8.0 Hz, 2H), 6.78 (d, *J* = 8.0 Hz, 2H), 5.14 (s, 1H), 3.89–3.78 (m, 2H), 2.26 (s, 3H), 2.11–1.98 (m, 9H), 1.61–1.54 (m, 6H), 0.76 (t, *J* = 7.2 Hz, 3H). <sup>13</sup>C NMR (150 MHz, CDCl<sub>3</sub>) δ 192.2 (Cq), 171.6 (Cq), 168.6 (Cq), 161.8 (Cq), 144.4 (Cq), 138.1 (CH), 129.7 (2C, CH), 129.1 (Cq), 124.8 (CH), 122.9 (CH), 120.4 (Cq), 115.3 (2C, CH), 113.4 (CH), 93.0 (Cq), 84.7 (Cq), 61.7 (CH), 61.5 (CH<sub>2</sub>), 40.8 (3C, CH<sub>2</sub>), 35.9 (3C, CH<sub>2</sub>), 30.9 (3C, CH), 20.5 (CH<sub>3</sub>), 13.4 (CH<sub>3</sub>). HRMS (ESI) *m/z*: calcd for C<sub>30</sub>H<sub>34</sub>NO<sub>6</sub> [M+H]<sup>+</sup> 504.2386, found 504.2375.

**Optical Rotation:** [ $\alpha$ ]<sub>D</sub><sup>25</sup> = + 40.7 (c = 1.0, CH<sub>2</sub>Cl<sub>2</sub>). The ee value was determined by HPLC analysis (only the major stereoisomers were considered) 99.8:0.2 *er*, Chiralcel AD-H column, hexane/*i*-PrOH = 90/10, flow rate = 1.0 mL/min,  $\lambda$  = 254 nm, retention time: *t*<sub>major</sub> = 13.7 min, *t*<sub>minor</sub> = 25.8 min.

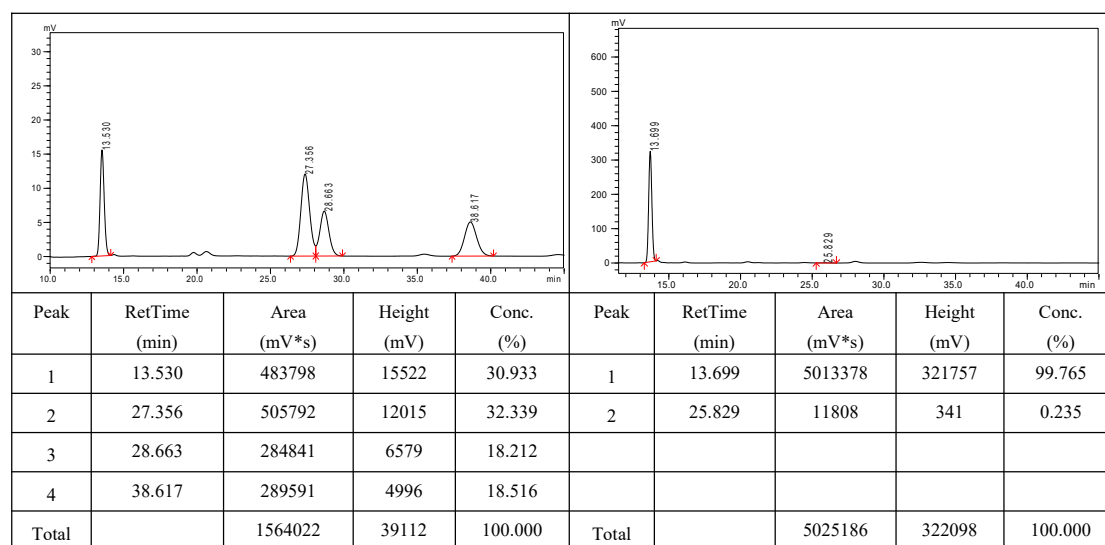

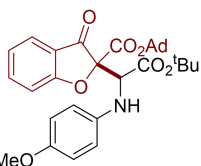

*Adamantan-1-yl-2-((S)-2-(tert-butoxy)-1-((4-methoxyphenyl)amino)-2-oxoethyl)-3-oxo-2,3-dihydrobenzofuran-2-carboxylate (3he)*

Yellow oil (88.7 mg, 81% yield); > 20:1 *dr*. <sup>1</sup>H NMR (400 MHz, CDCl<sub>3</sub>) δ 7.70 (d, *J* = 7.6 Hz, 1H), 7.66–7.62 (m, 1H), 7.24 (d, *J* = 8.4 Hz, 1H), 7.17–7.12 (m, 1H), 6.90–6.73 (m, 4H), 4.97 (s, 1H), 3.76 (s, 3H), 2.17–2.02 (m, 9H), 1.65–1.56 (m, 6H), 1.0 (s, 9H). <sup>13</sup>C NMR (100 MHz, CDCl<sub>3</sub>) δ 192.2 (Cq), 171.8 (Cq), 167.4 (Cq), 161.9 (Cq), 153.5 (Cq), 141.0 (Cq), 138.1 (CH), 124.9 (CH), 122.8 (CH), 120.6 (Cq), 116.6 (2C, CH), 114.6 (2C, CH), 113.5 (CH), 93.5 (Cq), 84.6 (Cq), 83.4 (Cq), 62.6 (CH), 55.7 (CH<sub>3</sub>), 40.8 (3C, CH<sub>2</sub>), 35.9 (3C, CH<sub>2</sub>), 30.9 (3C, CH), 27.3 (3C, CH<sub>3</sub>).

**HRMS (ESI) *m/z***: calcd for C<sub>32</sub>H<sub>38</sub>NO<sub>7</sub> [M+H]<sup>+</sup> 548.2643, found 548.2635.

**Optical Rotation**: [α]<sub>D</sub><sup>25</sup> = + 101.3 (c = 1.0, CH<sub>2</sub>Cl<sub>2</sub>). The *ee* value was determined by **HPLC analysis** (only the major stereoisomers were considered) 98.0:2.0 *er*, Chiralcel AD-H column, hexane/*i*-PrOH = 90/10, flow rate = 1.0 mL/min, λ = 254 nm, retention time: *t*<sub>major</sub> = 16.7 min, *t*<sub>minor</sub> = 15.6 min.

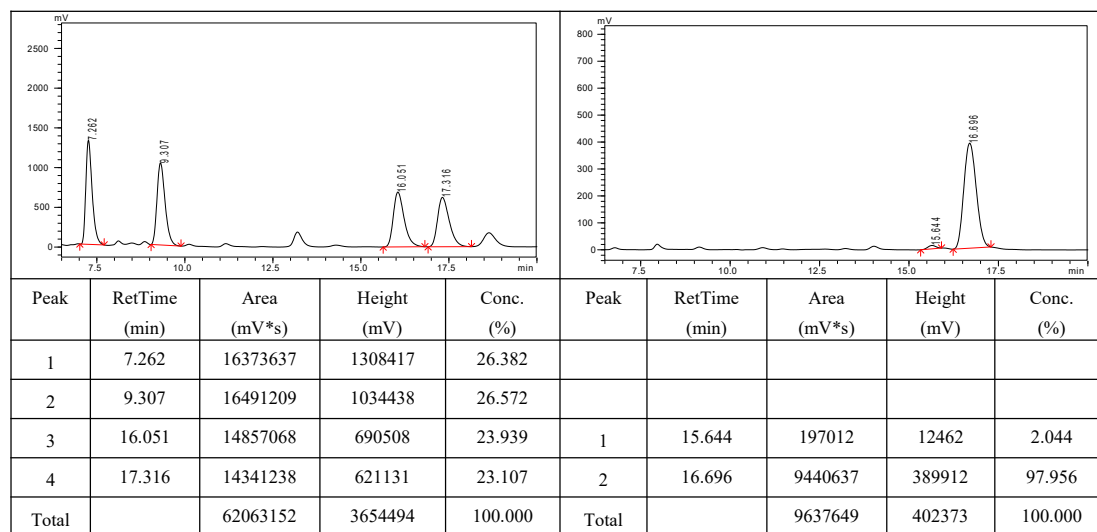



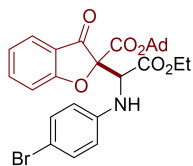

**Adamantan-1-yl 2-(1-((4-bromophenyl)amino)-2-ethoxy-2-oxoethyl)-3-oxo-2,3-dihydrobenzofuran-2-carboxylate (3hg)**

Pale yellow oil (83.0 mg, 73% yield); > 20:1 *dr* (92:8 *dr*, **from aging**). <sup>1</sup>H NMR (600 MHz, CDCl<sub>3</sub>) δ 7.73 (d, *J* = 7.8 Hz, 1H), 7.68–7.65 (m, 1H), 7.34 (d, *J* = 9.0 Hz, 2H), 7.25 (d, *J* = 8.4 Hz, 1H), 7.20–7.15 (m, 1H), 6.77 (d, *J* = 9.0 Hz, 2H), 5.16 (s, 1H), 3.94–3.84 (m, 2H), 2.17–1.97 (m, 9H), 1.63–1.57 (m, 6H), 0.80 (t, *J* = 7.2 Hz, 3H). <sup>13</sup>C NMR (100 MHz, CDCl<sub>3</sub>) δ 192.0 (Cq), 171.6 (Cq), 168.2 (Cq), 161.7 (Cq), 145.8 (Cq), 138.3 (CH), 132.0 (2C, CH), 124.9 (CH), 123.0 (CH), 120.3 (Cq), 116.5 (2C, CH), 113.4 (CH), 111.6 (Cq), 92.6 (Cq), 85.0 (Cq), 62.0 (CH), 60.8 (CH<sub>2</sub>), 40.8 (3C, CH<sub>2</sub>), 35.9 (3C, CH<sub>2</sub>), 30.9 (3C, CH), 13.4 (CH<sub>3</sub>). **HRMS (ESI) *m/z***: calcd for C<sub>29</sub>H<sub>31</sub><sup>79</sup>BrNO<sub>6</sub> [M+H]<sup>+</sup> 568.1335, found 568.1349.

**Optical Rotation:** [ $\alpha$ ]<sub>D</sub><sup>25</sup> = + 32.1 (c = 1.0, CH<sub>2</sub>Cl<sub>2</sub>). The *ee* value was determined by **HPLC analysis** (only the major stereoisomers were considered) 99.7:0.3 *er* (97.5:2.5 *er*, **from aging**), Chiralcel AD-H column, hexane/*i*-PrOH = 90/10, flow rate = 1.0 mL/min,  $\lambda$  = 254 nm, retention time: *t*<sub>major</sub> = 9.6 min, *t*<sub>minor</sub> = 25.5 min (*t*<sub>major</sub> = 9.6 min, *t*<sub>minor</sub> = 25.5 min, **from aging**).

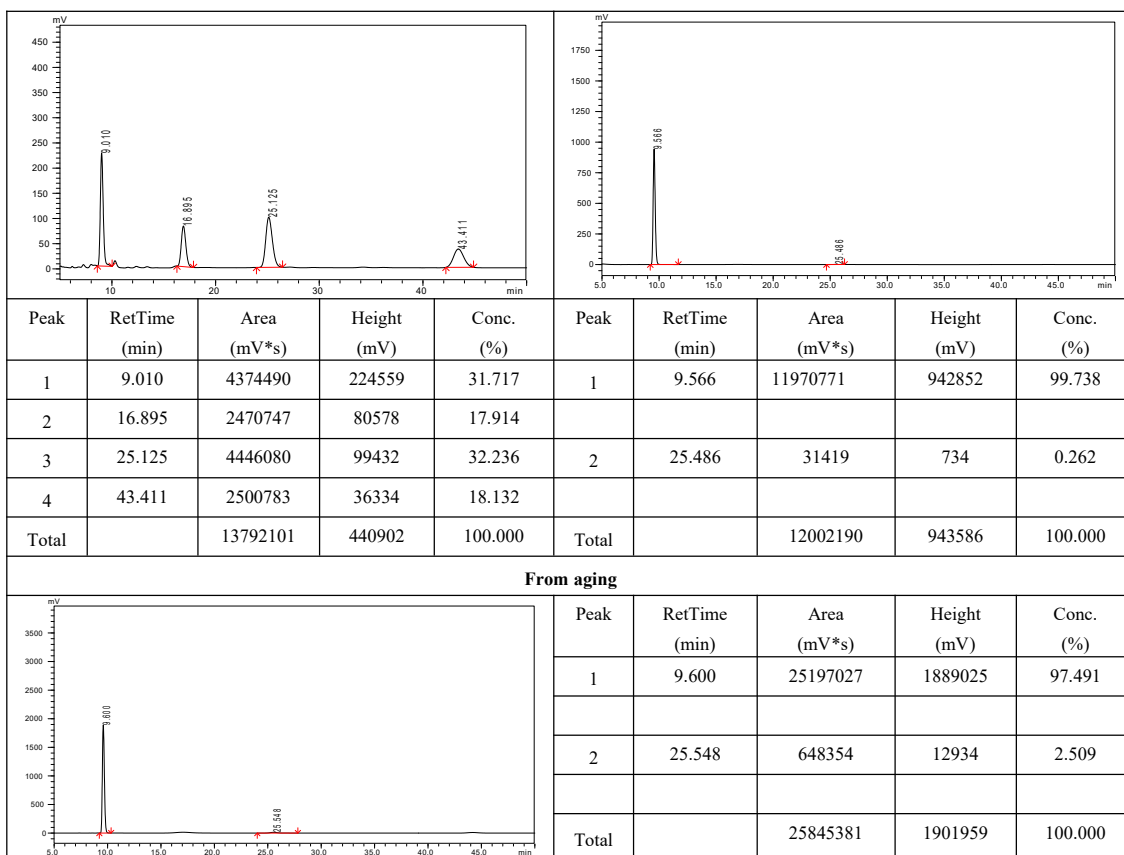

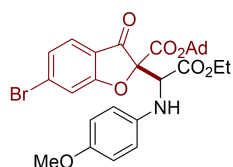

*Adamantan-1-yl-6-bromo-2-(2-ethoxy-1-((4-methoxyphenyl)amino)-2-oxoethyl)-3-oxo-2,3-dihydrobenzofuran-2-carboxylate (3ia)*

Yellow oil (95.8 mg, 80% yield); >20:1 *dr* (86:14 *dr*, **from aging**). <sup>1</sup>H NMR (400 MHz, CDCl<sub>3</sub>) δ 7.81 (s, 1H), 7.71 (d, *J* = 8.8 Hz, 1H), 7.14 (d, *J* = 8.8 Hz, 1H), 6.90–6.71 (m, 4H), 5.06 (s, 1H), 3.94–3.82 (m, 2H), 3.76 (s, 3H), 2.14–2.00 (m, 9H), 1.66–1.53 (m, 6H), 0.83 (t, *J* = 7.0 Hz, 3H). <sup>13</sup>C NMR (100 MHz, CDCl<sub>3</sub>) δ 190.8 (Cq), 170.3 (Cq), 168.7 (Cq), 161.3 (Cq), 153.7 (Cq), 141.7 (Cq), 127.3 (CH), 122.2 (Cq), 117.5 (CH), 116.7 (2C, CH), 115.5 (Cq), 115.1 (CH), 114.6 (2C, CH), 93.8 (Cq), 85.1 (Cq), 62.4 (CH), 61.9 (CH<sub>2</sub>), 55.7 (CH<sub>3</sub>), 40.8 (3C, CH<sub>2</sub>), 36.0 (3C, CH<sub>2</sub>), 30.9 (3C, CH), 13.6 (CH<sub>3</sub>). **HRMS (ESI)** *m/z*: calcd for C<sub>30</sub>H<sub>33</sub><sup>79</sup>BrNO<sub>7</sub> [M+H]<sup>+</sup> 598.1435, found 598.1436.

**Optical Rotation:** [ $\alpha$ ]<sub>D</sub><sup>25</sup> = + 31.2 (c = 1.0, CH<sub>2</sub>Cl<sub>2</sub>). The *ee* value was determined by **HPLC analysis** (only the major stereoisomers were considered) 99.9:0.1 *er* (96.7:3.3 *er*, **from aging**), Chiralcel AD-H column, hexane/*i*-PrOH = 90/10, flow rate = 1.0 mL/min,  $\lambda$  = 210 nm, retention time: *t*<sub>major</sub> = 17.1 min, *t*<sub>minor</sub> = 37.7 min (*t*<sub>major</sub> = 17.1 min, *t*<sub>minor</sub> = 38.7 min, **from aging**).

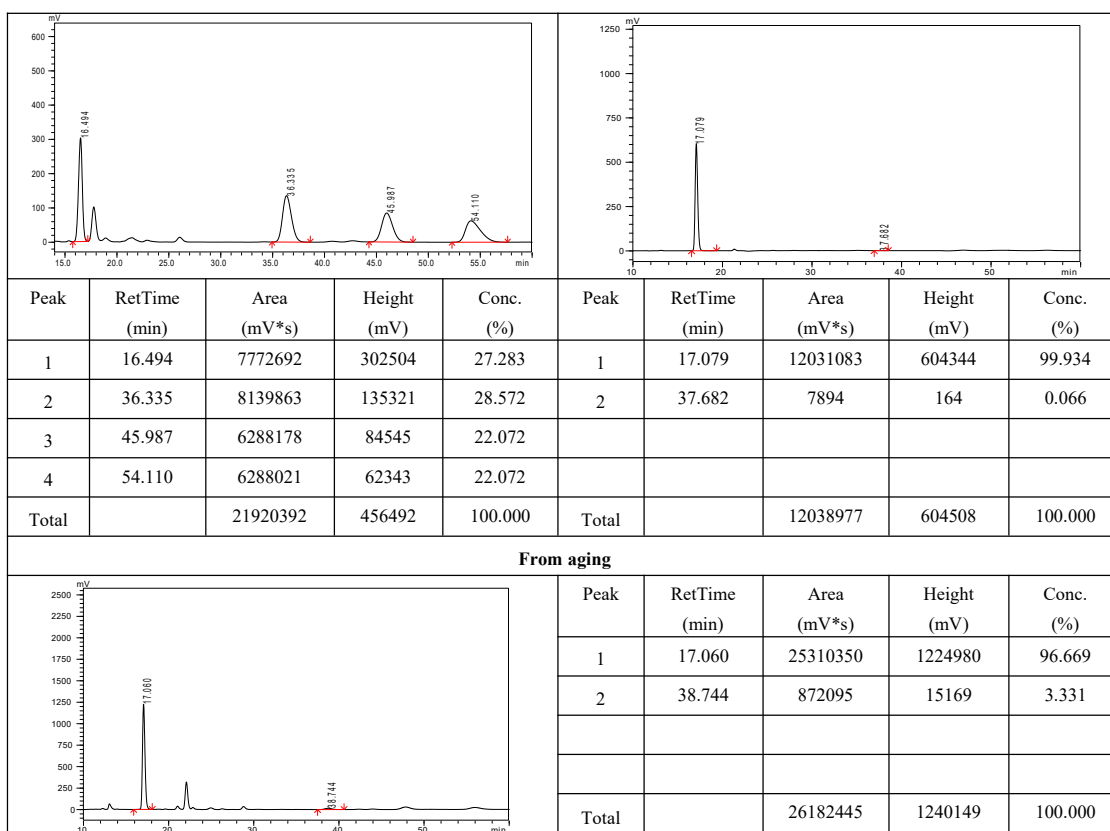

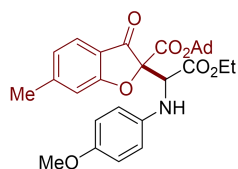

*Adamantan-1-yl-2-(2-ethoxy-1-((4-methoxyphenyl)amino)-2-oxoethyl)-6-methyl-3-oxo-2,3-dihydrobenzofuran-2-carboxylate (3ja)*

Pale yellow oil (95.0 mg, 89% yield); >20:1 *dr* (92:8 *dr*, **from aging**). <sup>1</sup>H NMR (400 MHz, CDCl<sub>3</sub>) δ 7.56 (d, *J* = 7.9 Hz, 1H), 7.02 (s, 1H), 6.94 (d, *J* = 7.9 Hz, 1H), 6.87–6.75 (m, 4H), 5.05 (s, 1H), 3.90–3.79 (m, 2H), 3.76 (s, 3H), 2.44 (s, 3H), 2.17–2.03 (m, 9H), 1.66–1.56 (m, 6H), 0.78 (t, *J* = 7.0 Hz, 3H). <sup>13</sup>C NMR (100 MHz, CDCl<sub>3</sub>) δ 190.5 (Cq), 172.2 (Cq), 168.8 (Cq), 162.0 (Cq), 153.6 (Cq), 140.7 (Cq), 124.4 (2C, CH), 117.4 (Cq), 116.8 (2C, CH), 114.6 (2C, CH), 113.4 (CH), 93.3 (Cq), 84.6 (Cq), 62.2 (CH), 61.7 (CH<sub>2</sub>), 55.7 (CH<sub>3</sub>), 40.8 (3C, CH<sub>2</sub>), 35.9 (3C, CH<sub>2</sub>), 30.9 (3C, CH), 22.6 (CH<sub>3</sub>), 13.6 (CH<sub>3</sub>). **HRMS (ESI) *m/z***: calcd for C<sub>31</sub>H<sub>36</sub>NO<sub>7</sub> [M+H]<sup>+</sup> 534.2492, found 534.2482.

**Optical Rotation:** [ $\alpha$ ]<sub>D</sub><sup>25</sup> = + 39.8 (*c* = 1.0, CH<sub>2</sub>Cl<sub>2</sub>). The *ee* value was determined by **HPLC analysis** (only the major stereoisomers were considered) 98.3:1.7 *er* (96.9:3.1 *er*, **from aging**), Chiralcel AD-H column, hexane/*i*-PrOH = 85/15, flow rate = 1.0 mL/min,  $\lambda$  = 254 nm, retention time: *t*<sub>major</sub> = 13.9 min, *t*<sub>minor</sub> = 52.1 min; (*t*<sub>major</sub> = 14.0 min, *t*<sub>minor</sub> = 52.9 min, **from aging**).

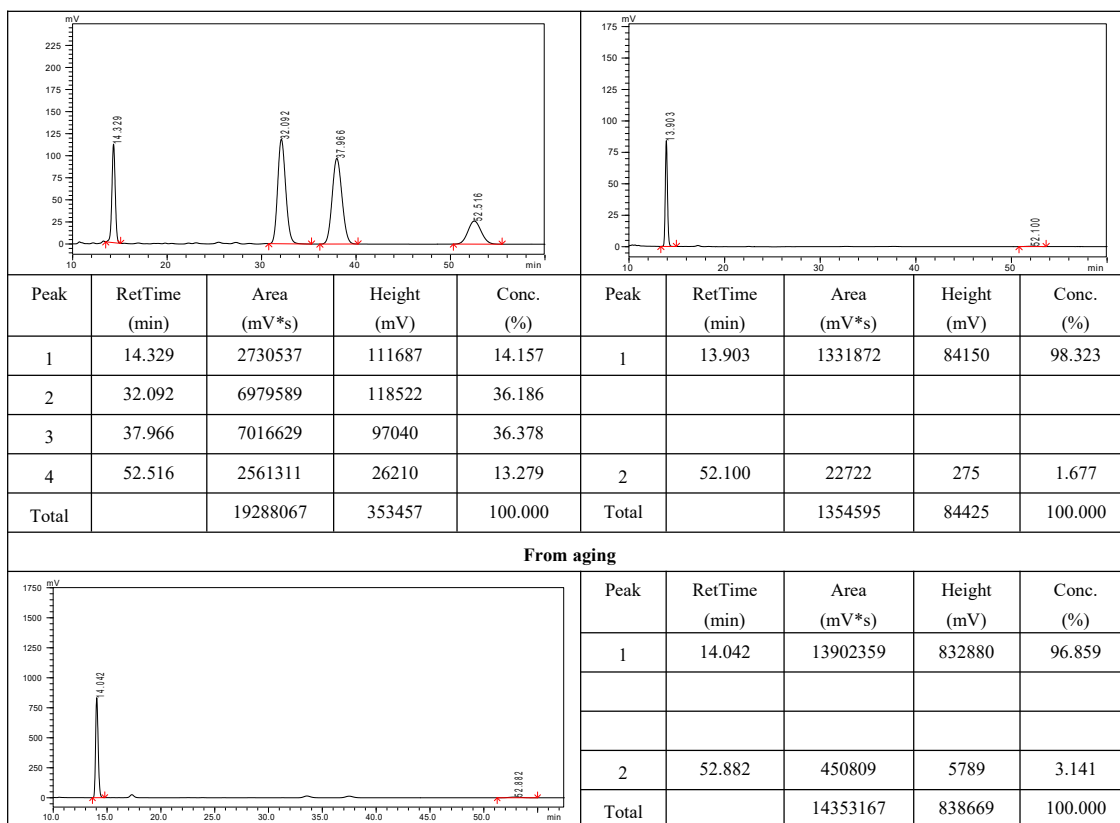

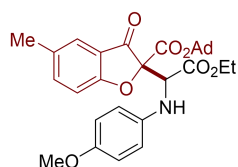

**Adamantan-1-yl-2-(2-ethoxy-1-((4-methoxyphenyl)amino)-2-oxoethyl)-5-methyl-3-oxo-2,3-dihydrobenzofuran-2-carboxylate (3ka)**

Yellow oil (96.1 mg, 90% yield); >20:1 *dr*. **<sup>1</sup>H NMR** (400 MHz, CDCl<sub>3</sub>) δ 7.46–7.40 (m, 2H, including s, 1H), 7.10 (d, *J* = 8.4 Hz, 1H), 6.83–6.76 (m, 4H), 5.04 (s, 1H), 3.88–3.76 (m, 2H), 3.74 (s, 3H), 2.34 (s, 3H), 2.13–1.99 (m, 9H), 1.65–1.54 (m, 6H), 0.76 (t, *J* = 7.2 Hz, 3H). **<sup>13</sup>C NMR** (100 MHz, CDCl<sub>3</sub>) δ 192.2 (Cq), 170.1 (Cq), 168.7 (Cq), 161.9 (Cq), 153.5 (Cq), 140.7 (Cq), 139.4 (CH), 132.6 (Cq), 124.1 (CH), 120.2 (Cq), 116.7 (2C, CH), 114.6 (2C, CH), 112.9 (CH), 93.2 (Cq), 84.5 (Cq), 62.3 (CH), 61.7 (CH<sub>2</sub>), 55.6 (CH<sub>3</sub>), 40.7 (3C, CH<sub>2</sub>), 35.9 (3C, CH<sub>2</sub>), 30.8 (3C, CH), 20.6 (CH<sub>3</sub>), 13.4 (CH<sub>3</sub>). **HRMS (ESI) *m/z***: calcd for C<sub>31</sub>H<sub>36</sub>NO<sub>7</sub> [M+H]<sup>+</sup> 534.2492, found 534.2508.

**Optical Rotation:** [ $\alpha$ ]<sub>D</sub><sup>25</sup> = + 41.2 (c = 1.0, CH<sub>2</sub>Cl<sub>2</sub>). The *ee* value was determined by **HPLC analysis** (only the major stereoisomers were considered) 99.5:0.5 *er*, Chiralcel AD-H column, hexane/*i*-PrOH = 90/10, flow rate = 1.0 mL/min,  $\lambda$  = 254 nm, retention time: *t*<sub>major</sub> = 17.9 min, *t*<sub>minor</sub> = 32.1 min.

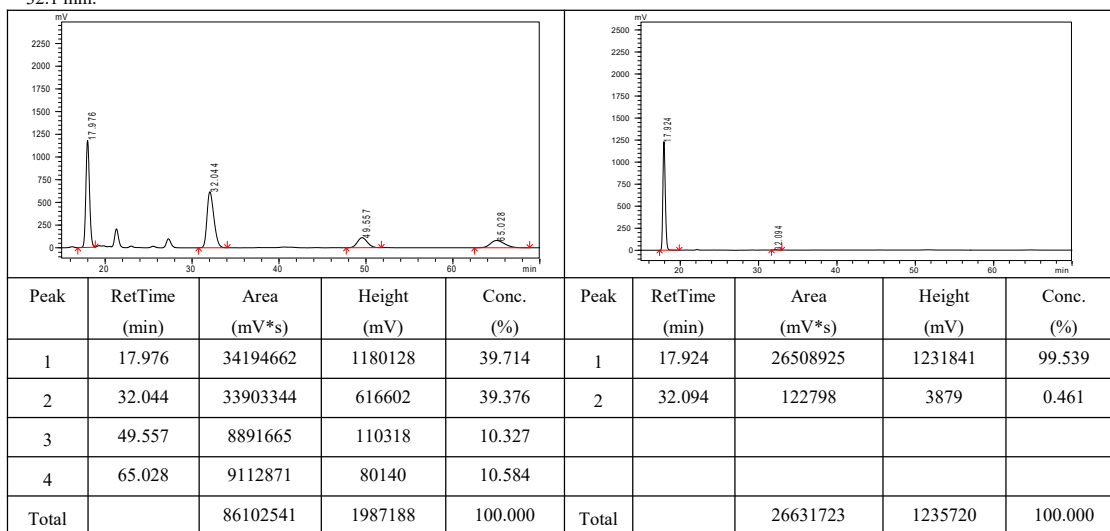

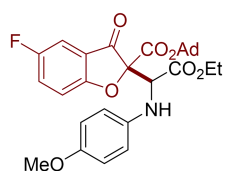

**Adamantan-1-yl-2-(2-ethoxy-1-((4-methoxyphenyl)amino)-2-oxoethyl)-5-fluoro-3-oxo-2,3-dihydrobenzofuran-2-carboxylate (31a)**

Pale yellow solid (89.2 mg, 83% yield); >20:1 *dr*. <sup>1</sup>H NMR (600 MHz, CDCl<sub>3</sub>) δ 7.34 (d, *J* = 1.6 Hz, 1H), 7.26–7.18 (m, 2H), 6.82–6.71 (m, 4H), 5.07 (s, 1H), 4.29–4.19 (m, 2H), 3.72 (s, 3H), 2.18–2.10 (m, 9H), 1.67–1.61 (m, 6H), 1.26 (t, *J* = 6.9 Hz, 3H). <sup>13</sup>C NMR (150 MHz, CDCl<sub>3</sub>) δ 193.1 (Cq), 169.7 (Cq), 168.6 (Cq), 161.7 (Cq), 158.1 (d, *J*<sub>1</sub> = 243.0 Hz, Cq), 154.1 (Cq), 140.5 (Cq), 125.7 (d, *J*<sub>2</sub> = 25.5 Hz, CH), 120.7 (d, *J*<sub>3</sub> = 7.5 Hz, Cq), 117.5 (2C, CH), 114.6 (2C, CH), 114.3 (d, *J*<sub>3</sub> = 7.5 Hz, CH), 110.1 (d, *J*<sub>2</sub> = 24.0 Hz, CH), 93.5 (Cq), 84.4 (Cq), 63.2 (CH), 62.3 (CH<sub>2</sub>), 55.6 (CH<sub>3</sub>), 41.0 (3C, CH<sub>2</sub>), 36.0 (3C, CH<sub>2</sub>), 30.9 (3C, CH), 14.2 (CH<sub>3</sub>). <sup>19</sup>F NMR (564 MHz, CDCl<sub>3</sub>) δ -120.0. HRMS (ESI) *m/z*: calcd for C<sub>30</sub>H<sub>33</sub><sup>19</sup>FNO<sub>7</sub> [M+H]<sup>+</sup> 538.2241, found 538.2261.

**Optical Rotation:** [α]<sub>D</sub><sup>25</sup> = + 25.3 (c = 1.0, CH<sub>2</sub>Cl<sub>2</sub>). The *ee* value was determined by HPLC analysis (only the major stereoisomers were considered) 98.2:1.8 *er*, Chiralcel AD-H column, hexane/*i*-PrOH = 90/10, flow rate = 1.0 mL/min, λ = 254 nm, retention time: *t*<sub>major</sub> = 40.5 min, *t*<sub>minor</sub> = 28.4 min.

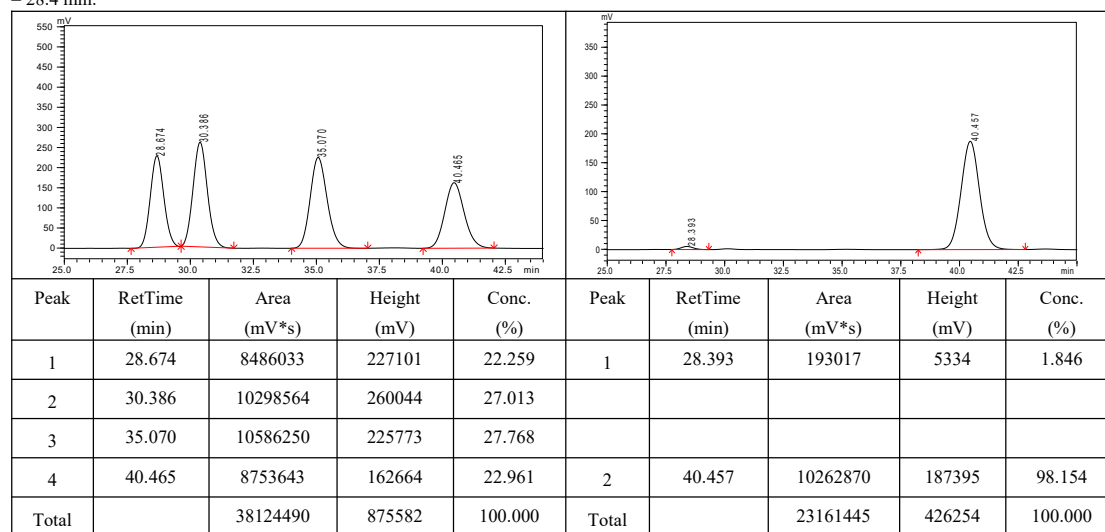

## 8. NMR spectra

### 8.1 Ligands

6,6'-(1E,1'E)-(((1R,2R)-cyclohexane-1,2-diyl)bis(azanylylidene))bis(methanylylidene))bis(2-(tert-butyl)phenol) (L9)

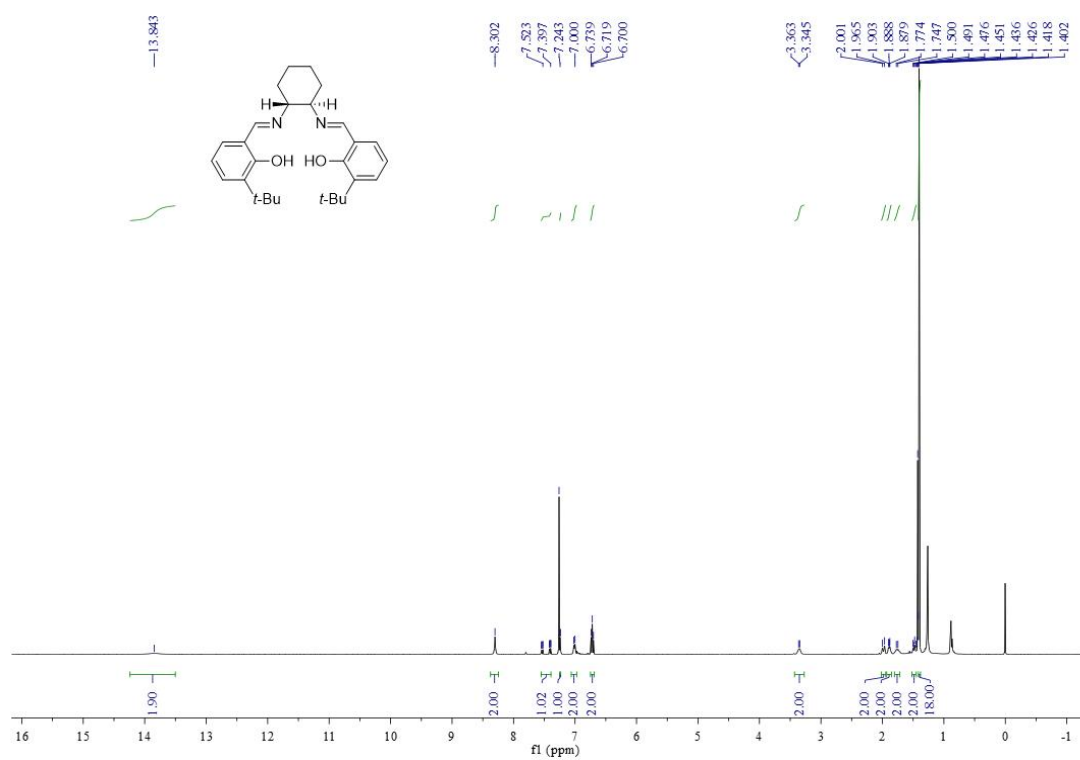

6,6'-((1*E*,1'*E*)-((1*R*,2*R*)-cyclohexane-1,2-diyl)bis(azanilylidene))bis(2,2-dimethylpropan-1-yl-1-ylidene))bis(2,4-di-*tert*-butylphenol) (L13)

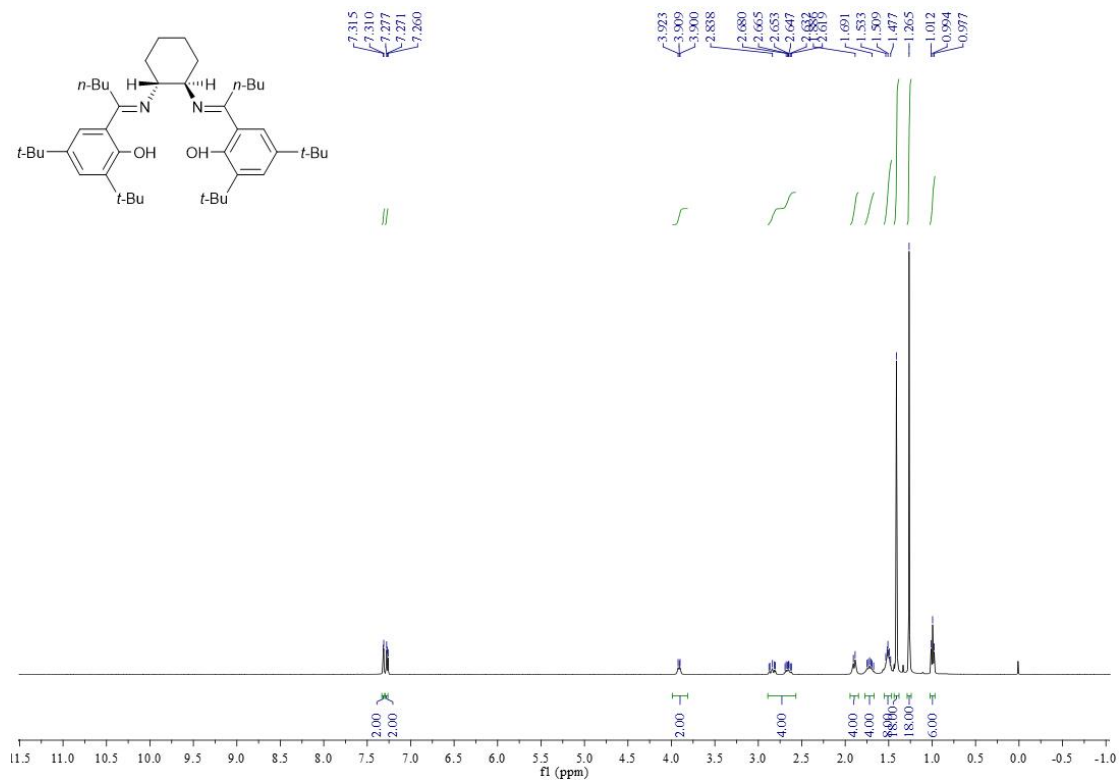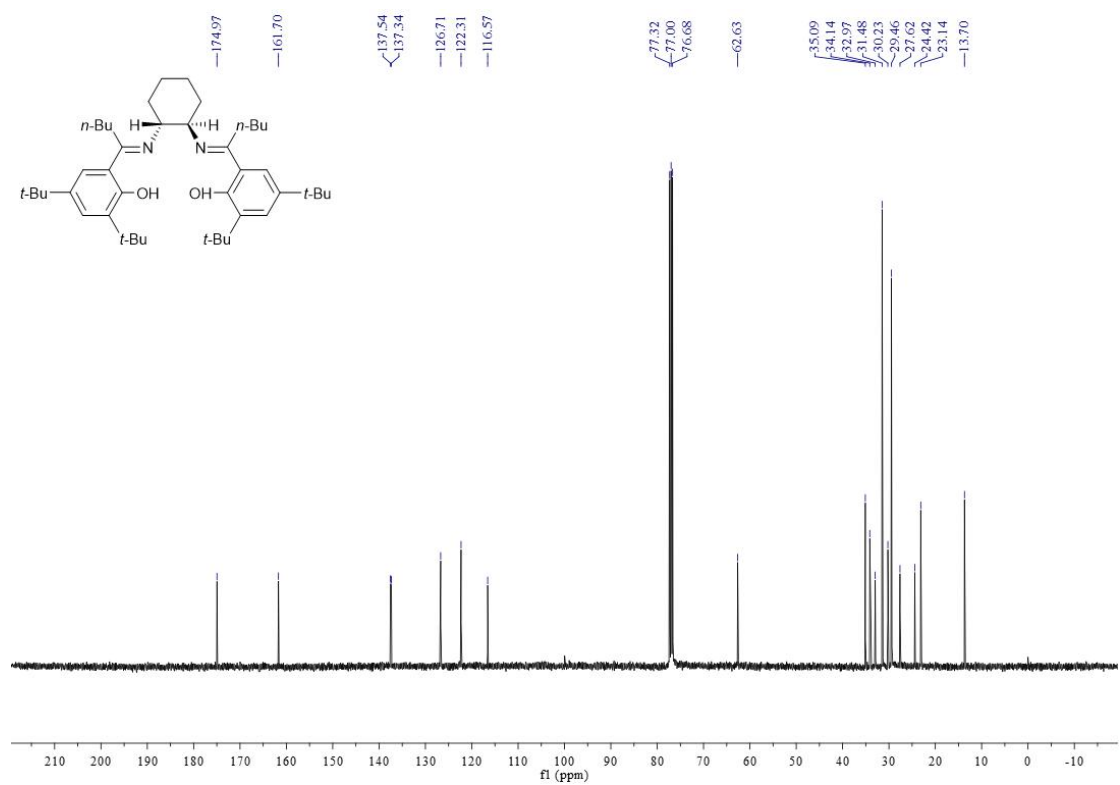

(1*R*,2*R*)-cyclohexane-1,2-diyl-bis(azanylylidene)-bis(methanylylidene)-bis(naphthalen-2-ol) (**L14**)

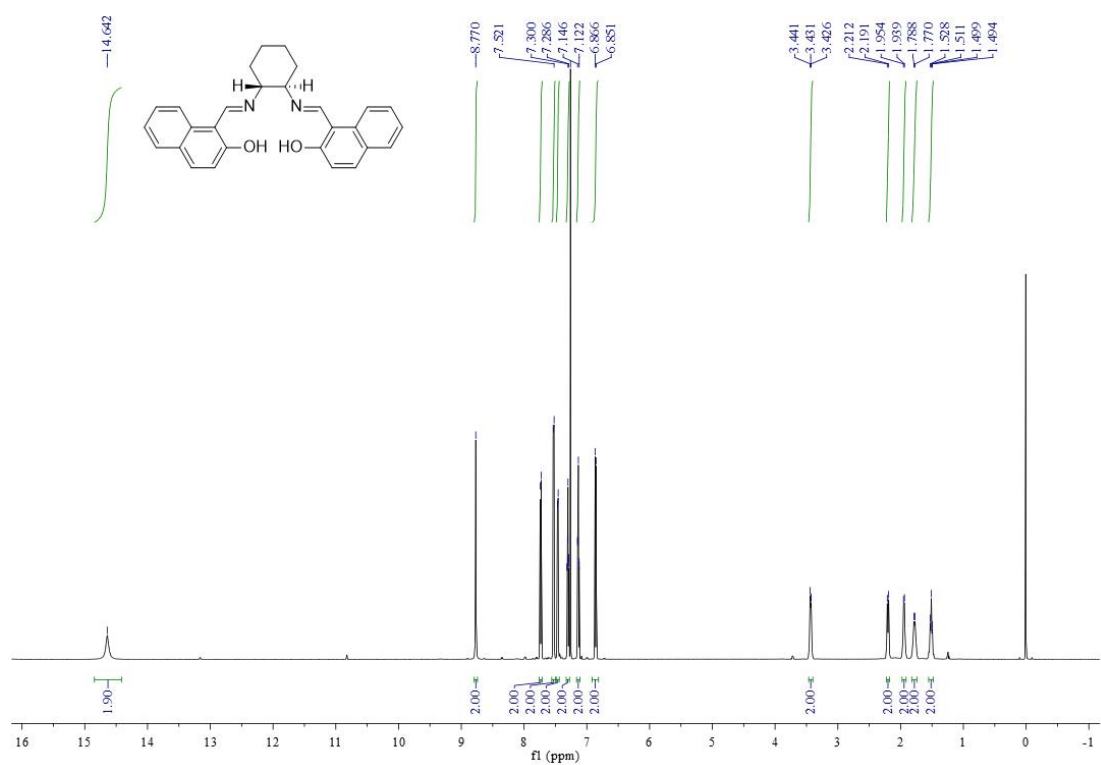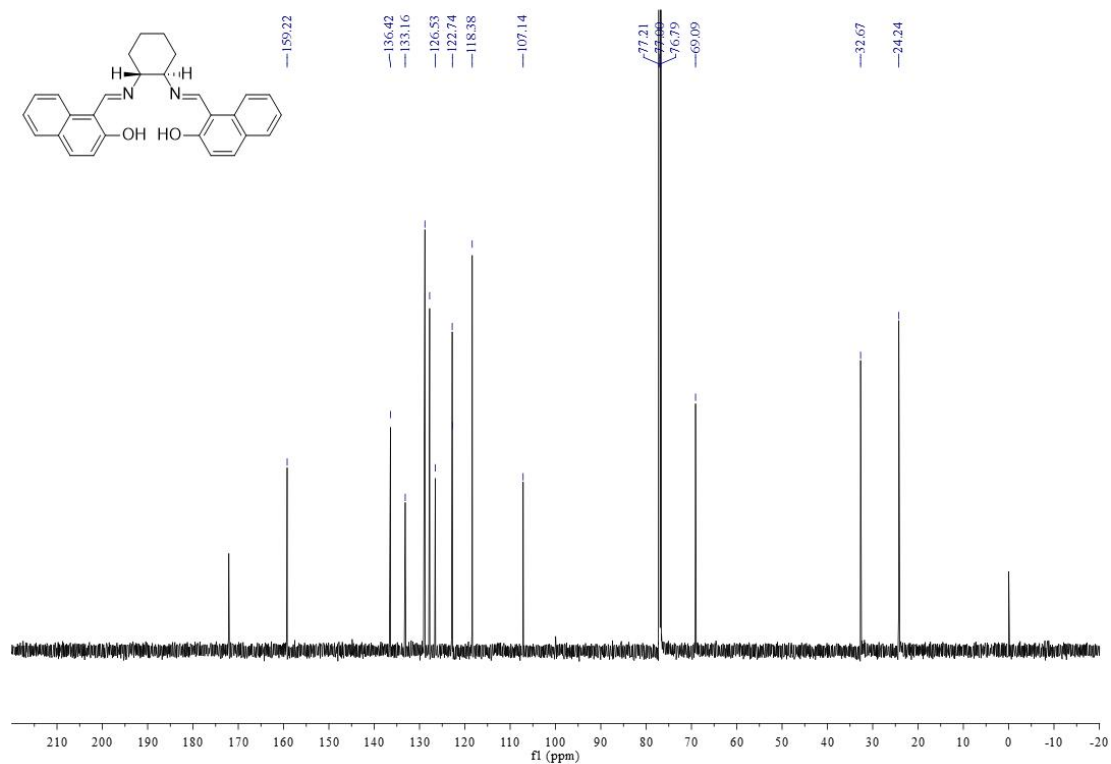



3,6-di-*tert*-butyl-1-(1*R*,2*R*)-2-((6-(*tert*-butyl)-2-hydroxy-3-methylnaphthalen-1-yl)methylene) amino)cyclohexyl imino methyl)naphthalen-2-ol  
**(L15)**

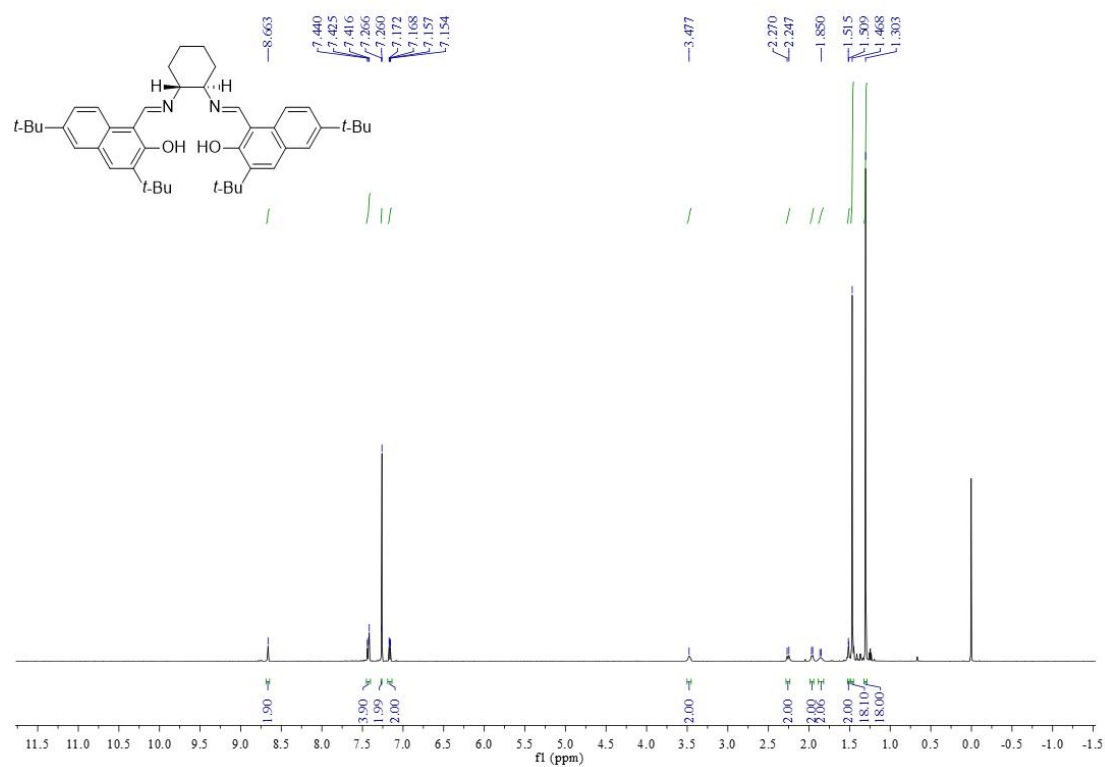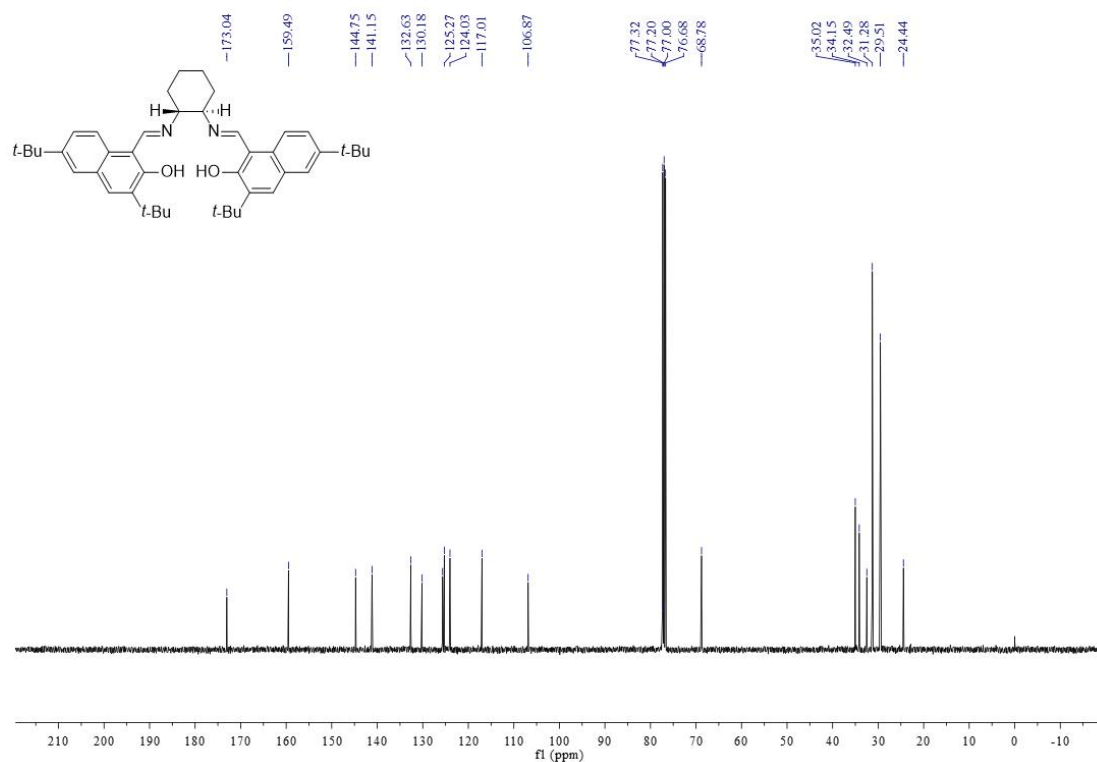

3,6-di-adamantyl-1-(1*R*,2*R*)-2-((6-(adamantyl)-2-hydroxy-3-methylnaphthalen-1-yl)methylene) amino)cyclohexyl imino methyl)naphthalen-2-ol  
(L16)

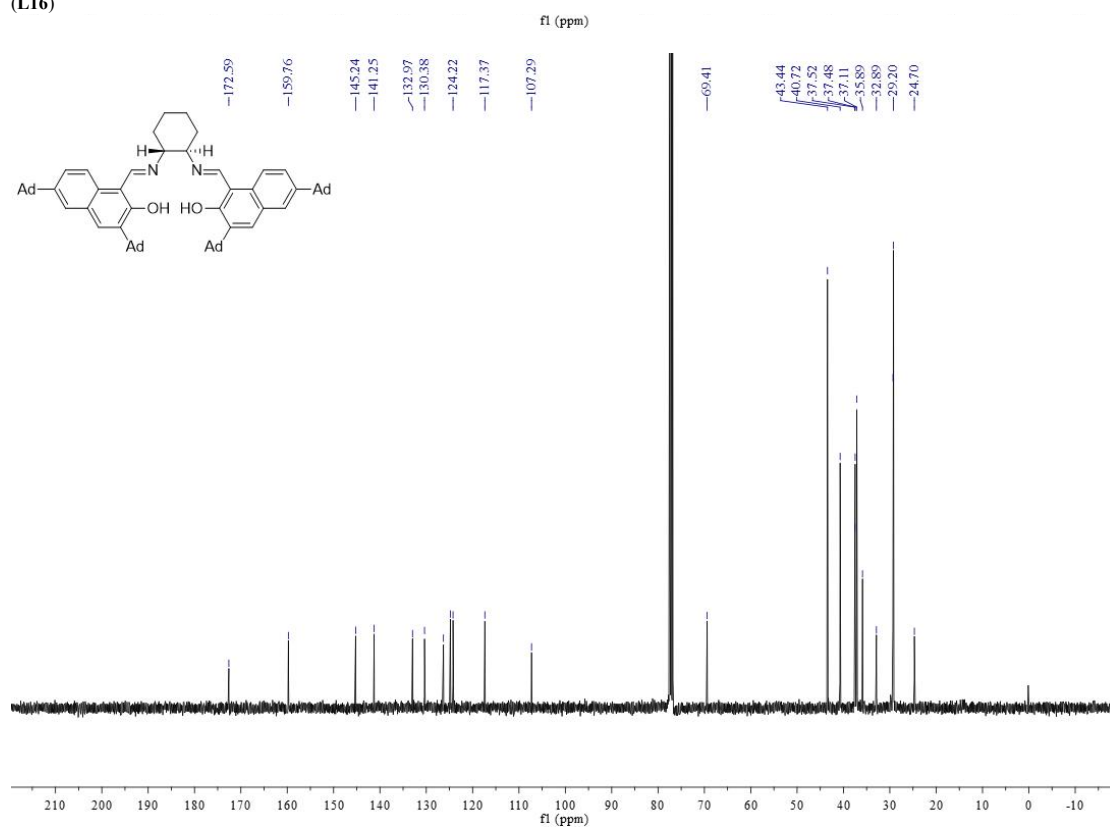

## 8.2 Radical trapping product

ethyl *N*-(3,5-di-*tert*-butyl-4-hydroxybenzyl)-*N*-(4-methoxyphenyl)glycinate (**2a-BHT**)

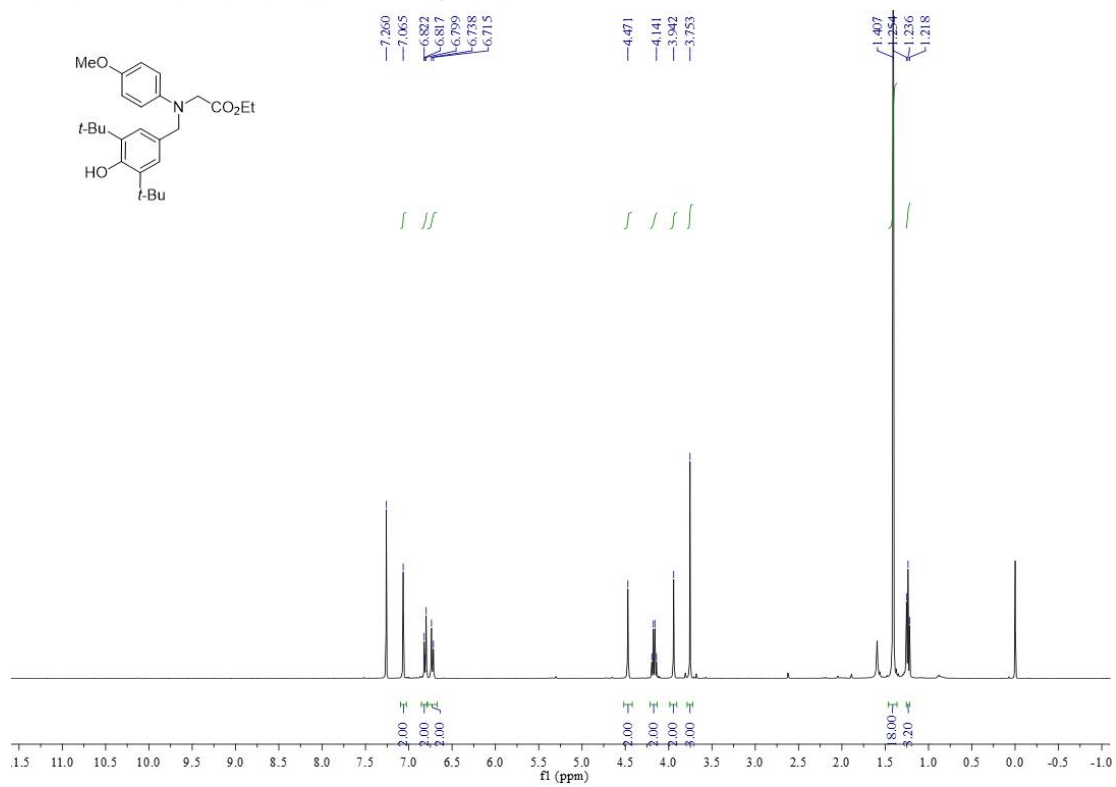

### 8.3 Products

Adamantan-1-yl-2-(2-ethoxy-1-((4-methoxyphenyl)amino)-2-oxoethyl)-1-oxo-2,3-dihydro-1H-indene-2-carboxylate (**3aa**)

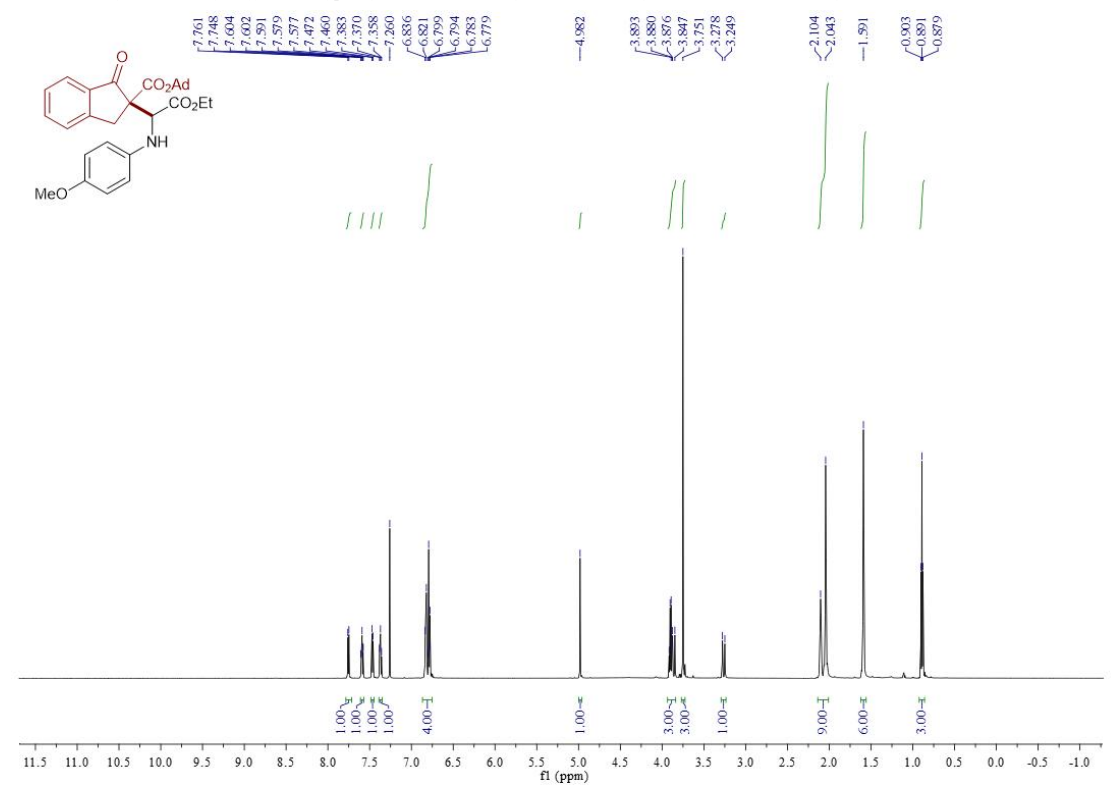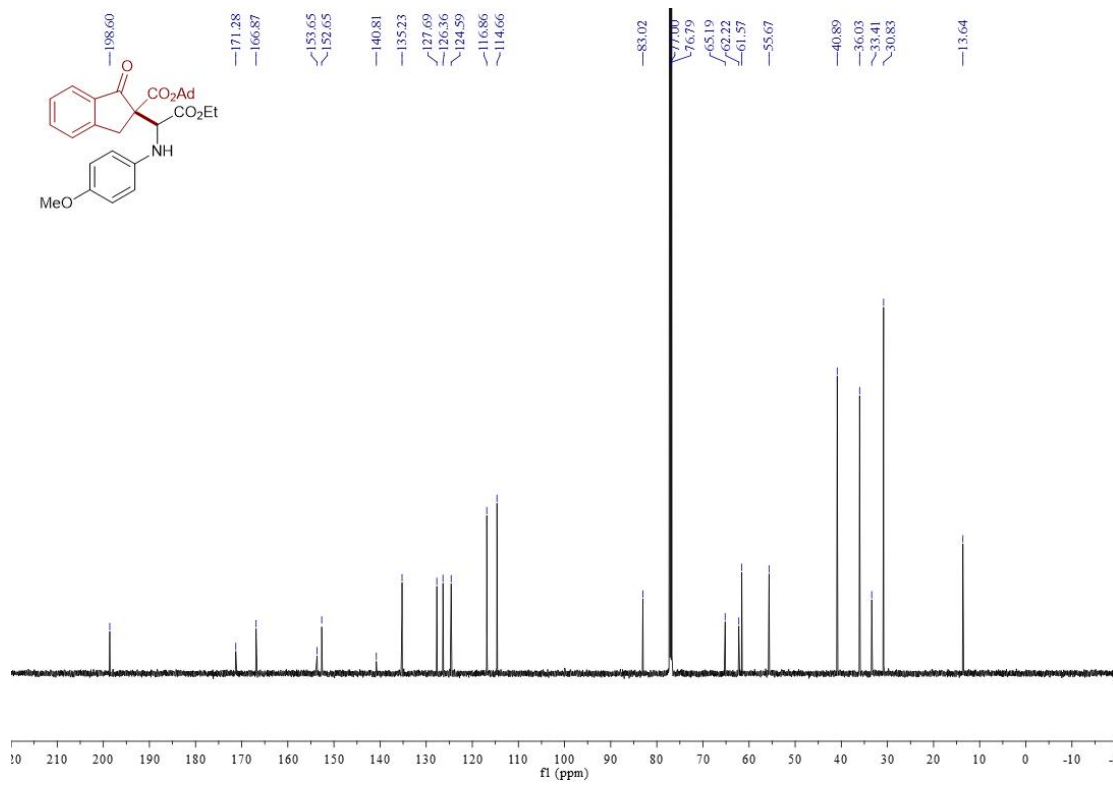

Adamantan-1-yl-2-(2-ethoxy-2-oxo-1-(p-tolylamino)ethyl)-1-oxo-2,3-dihydro-1H-indene-2-carboxylate (**3ab**)

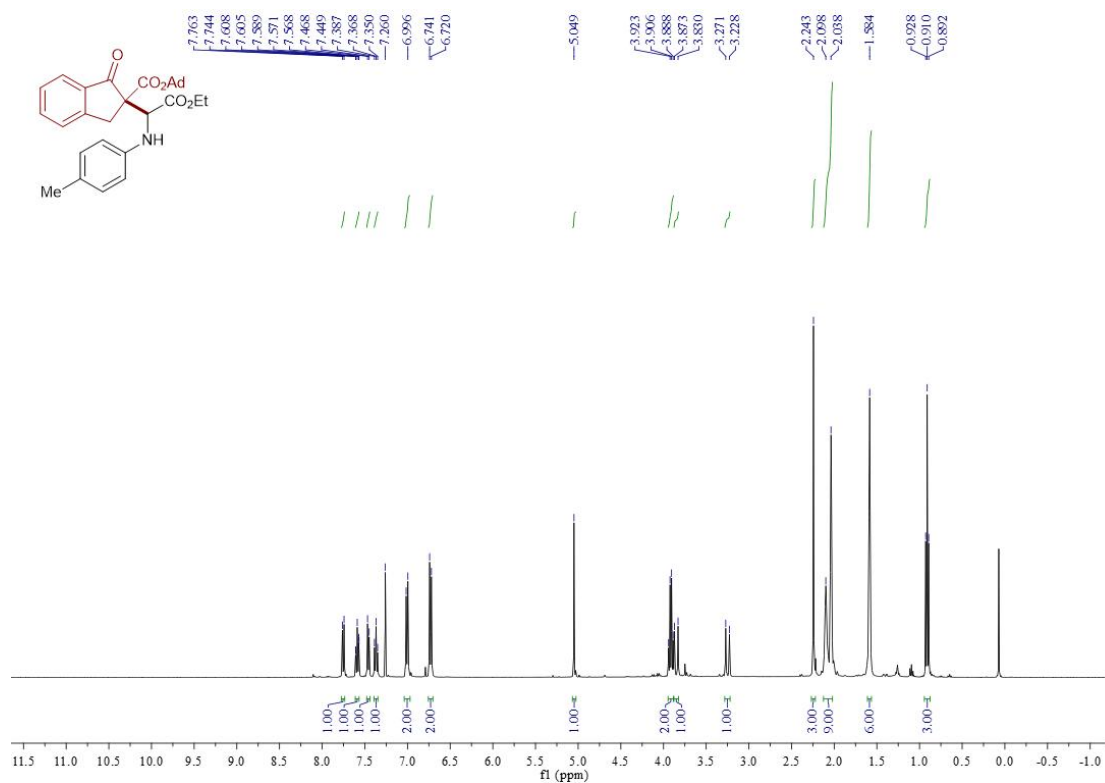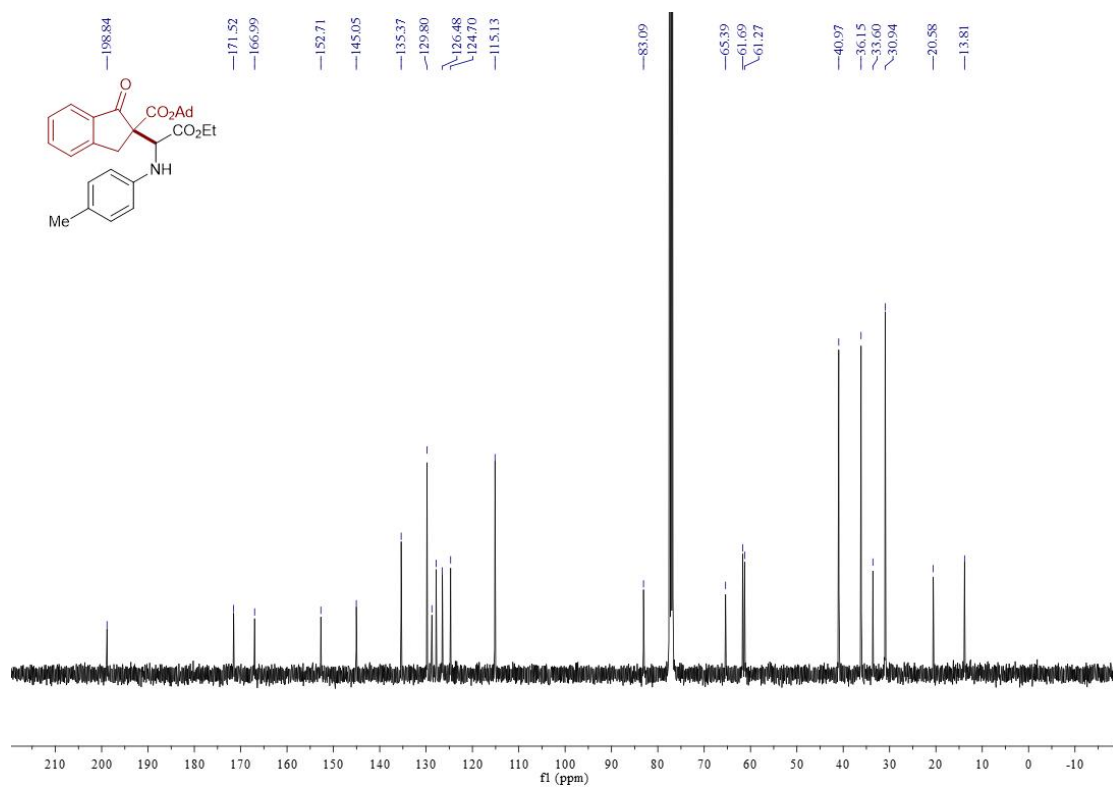

Adamantan-1-yl-2-(2-methoxy-2-oxo-1-(p-tolylamino)ethyl)-1-oxo-2,3-dihydro-1H-indene-2-carboxylate (**3ac**)

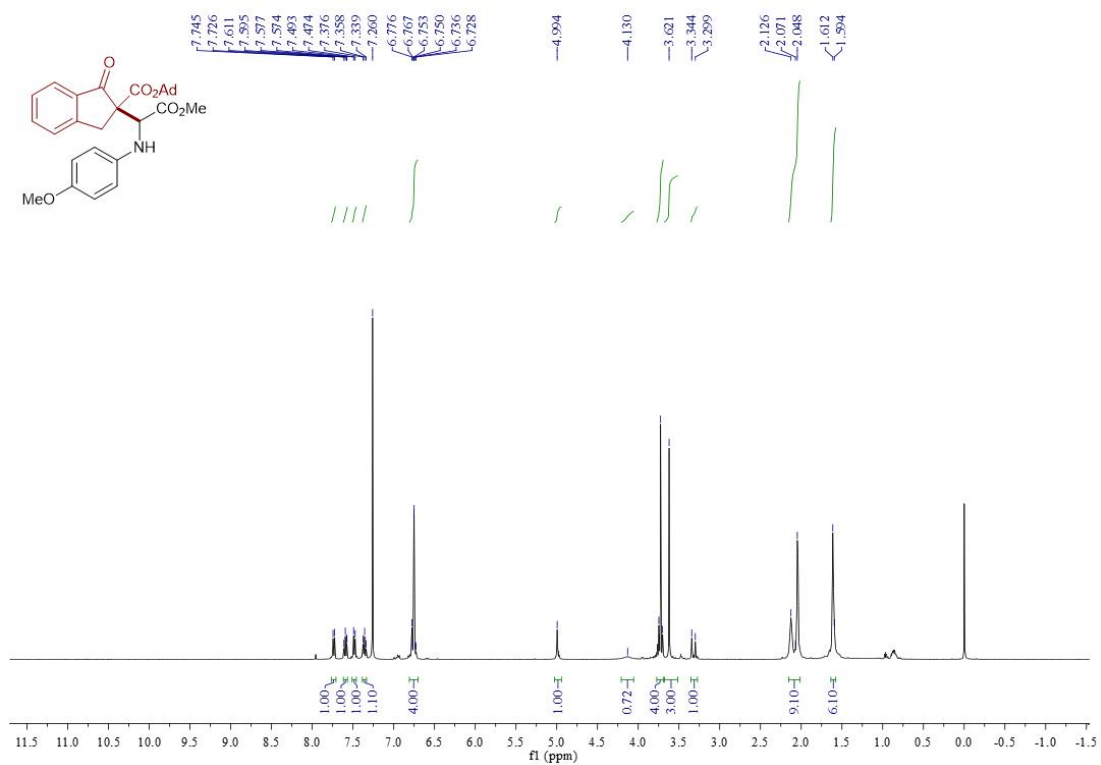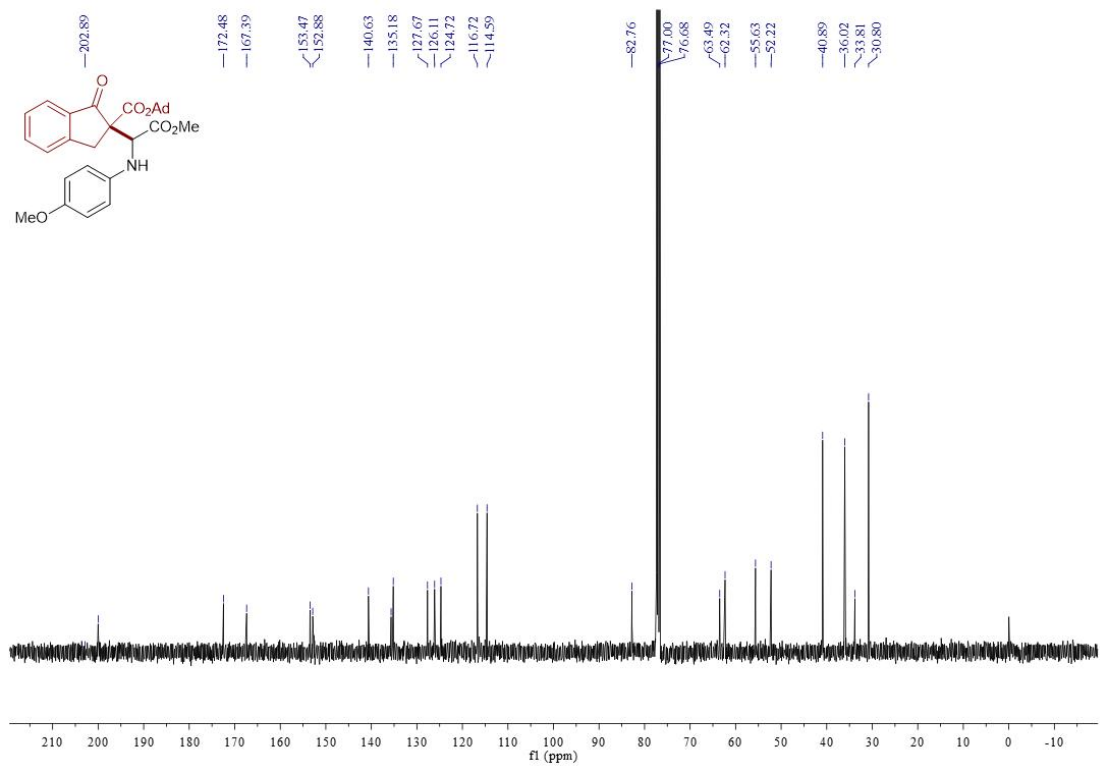

Adamantan-1-yl-2-(2-isopropoxy-1-((4-methoxyphenyl)amino)-2-oxoethyl)-1-oxo-2,3-dihydro-1H-indene-2-carboxylate (**3ad**)

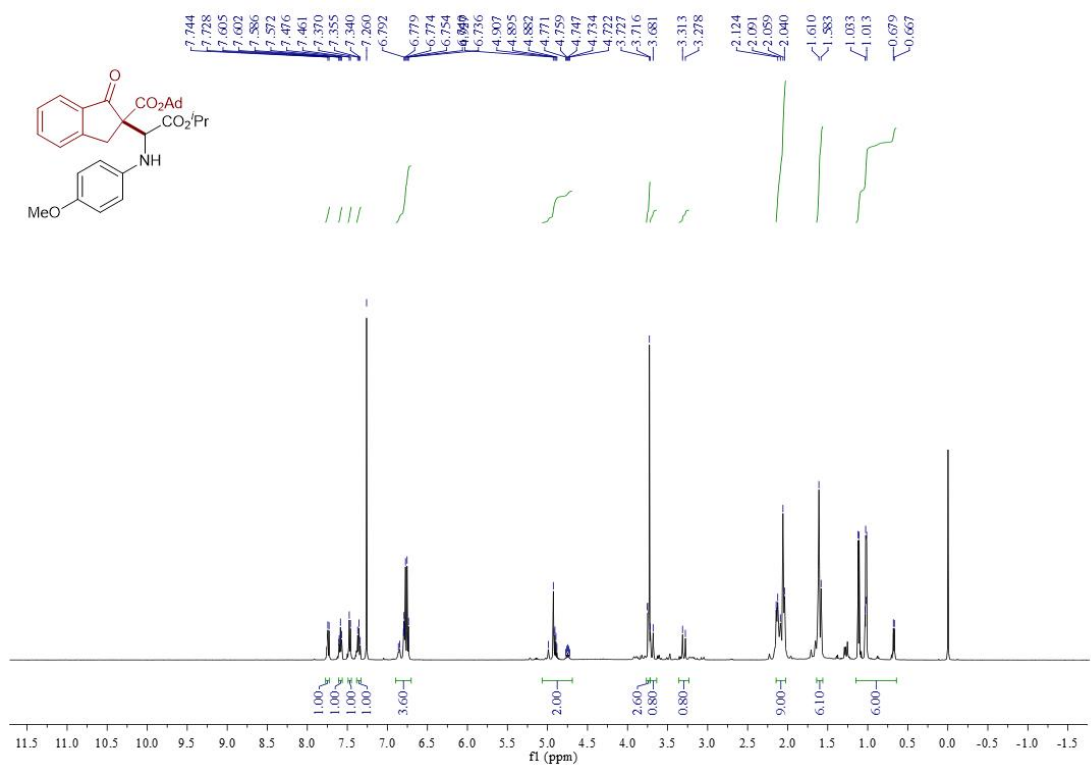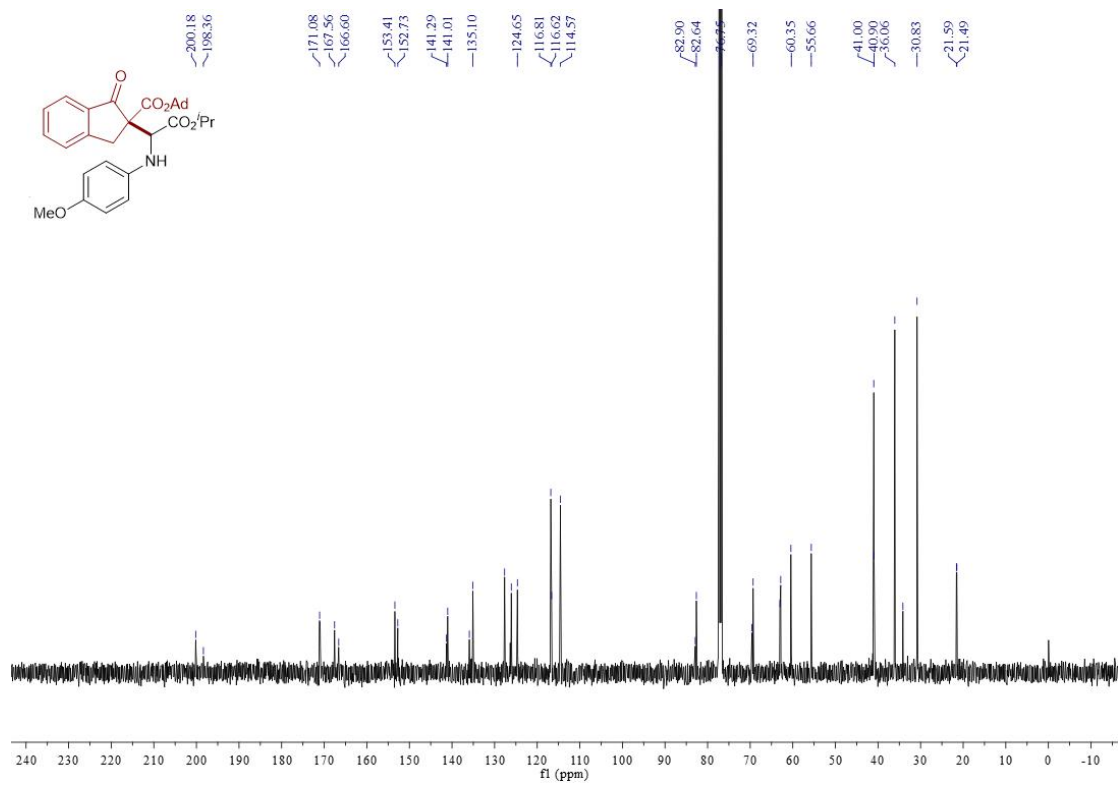

Adamantan-1-yl-2-(2-(tert-butoxy)-1-((4-methoxyphenyl) amino)-2-oxoethyl)-1-oxo-2,3-dihydro-1H-indene-2-carboxylate (**3ae**)

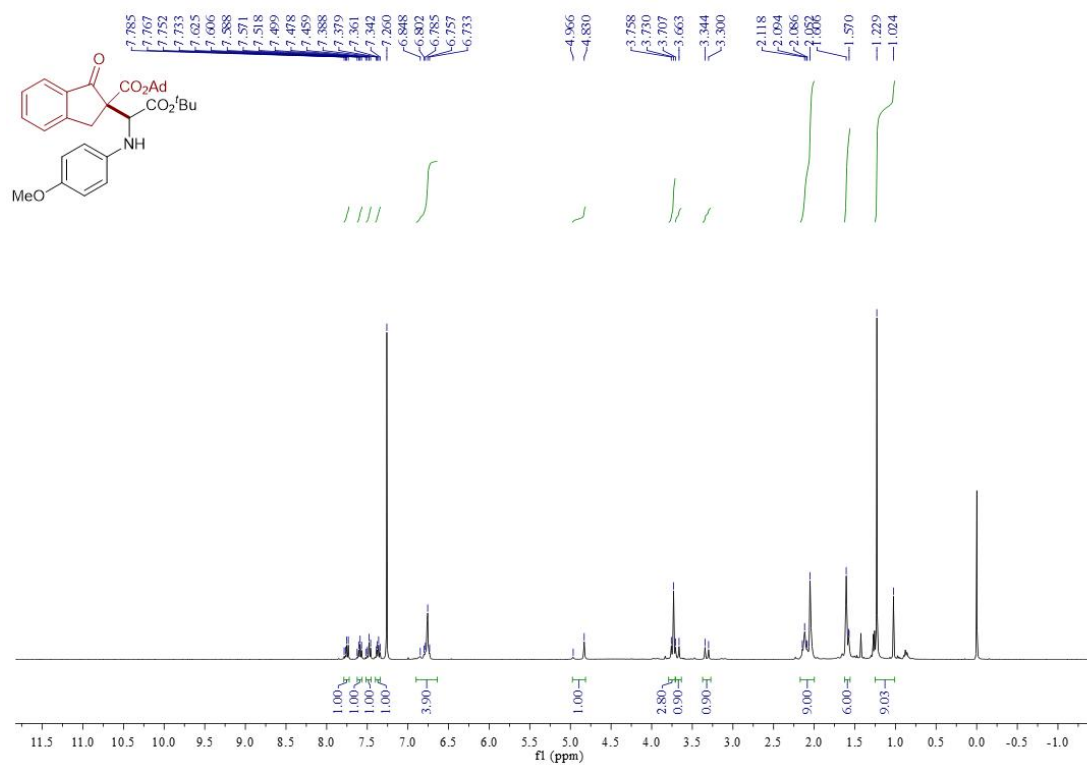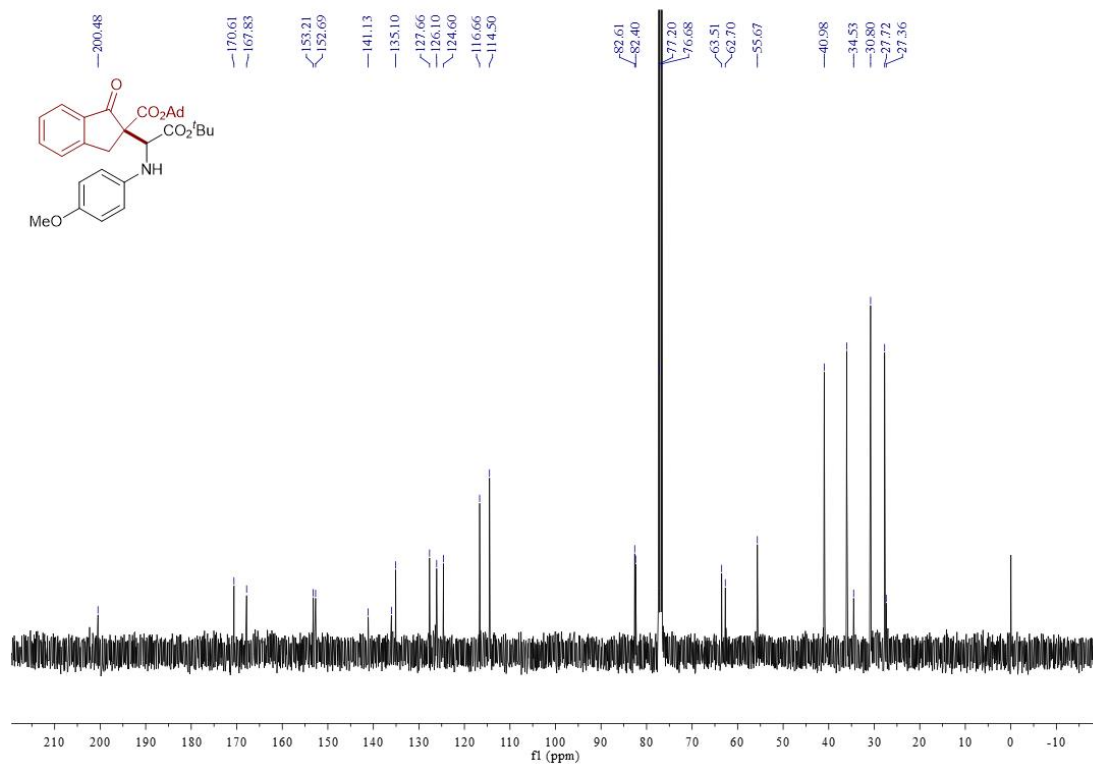



Adamantan-1-yl-2-(2-(benzyloxy)-1-((4-methoxyphenyl)amino)-2-oxoethyl)-1-oxo-2,3-dihydro-1H-indene-2-carboxylate (**3af**)

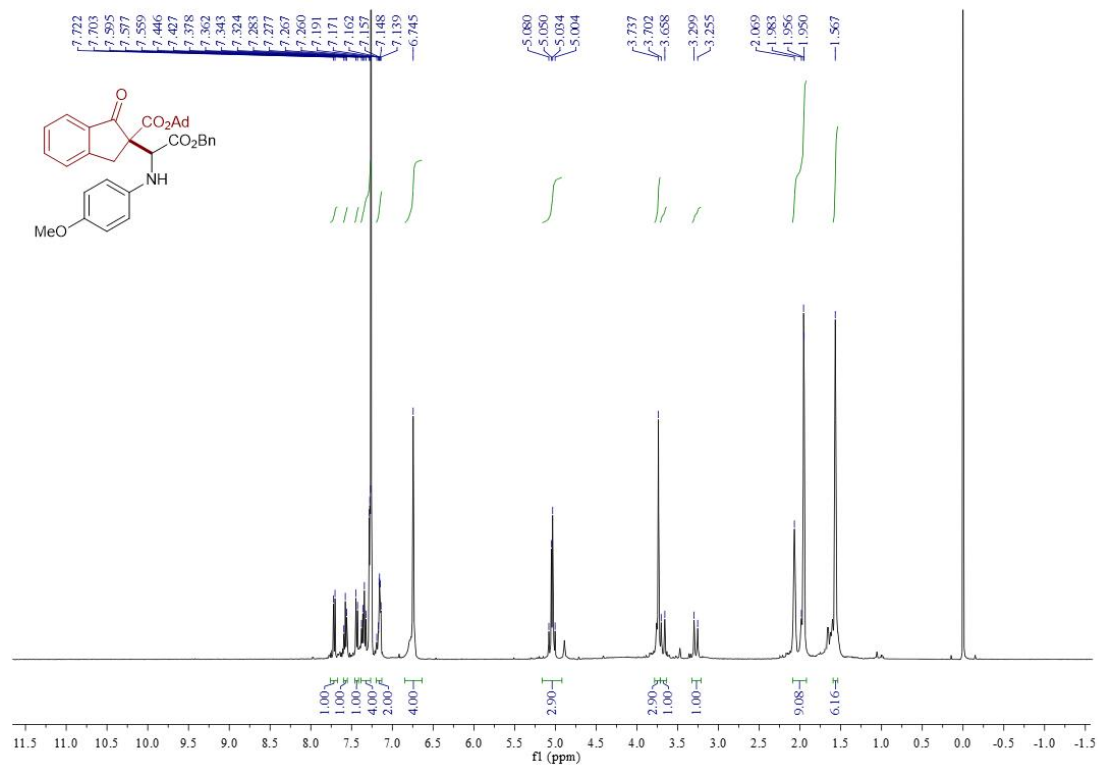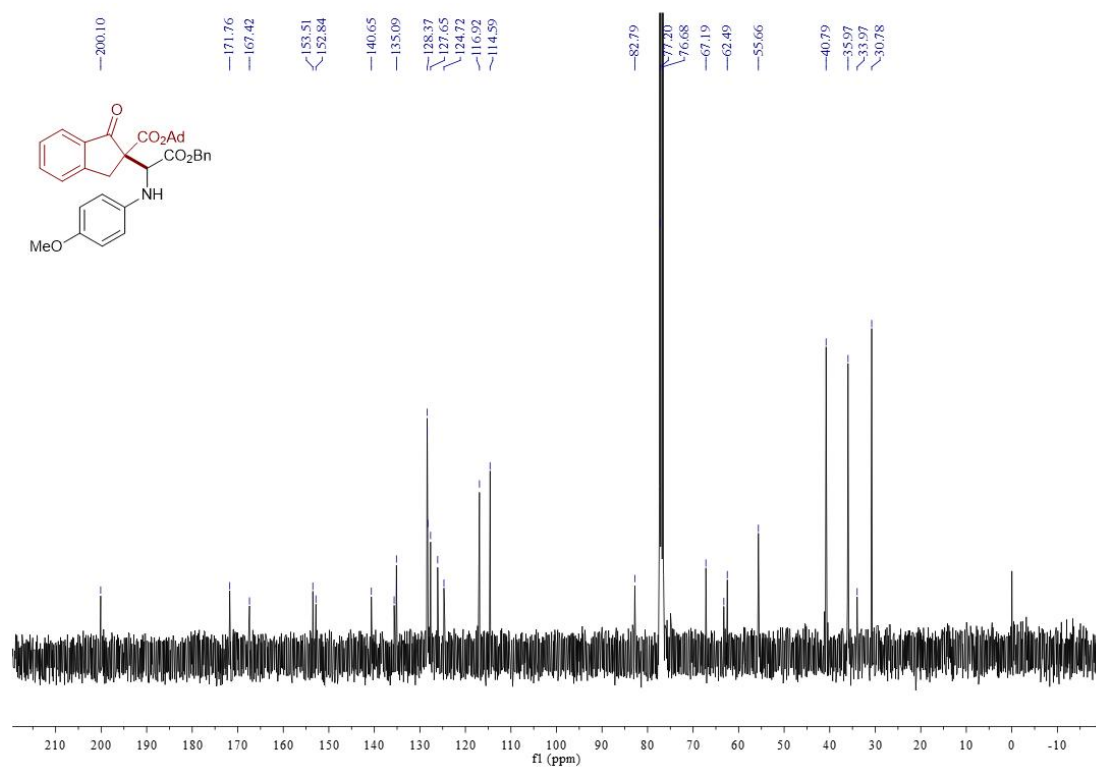

Adamantan-1-yl-2-(2-ethoxy-1-((4-methoxyphenyl)amino)-2-oxoethyl)-5-fluoro-1-oxo-2,3-dihydro-1H-indene-2-carboxylate (**3ba**)

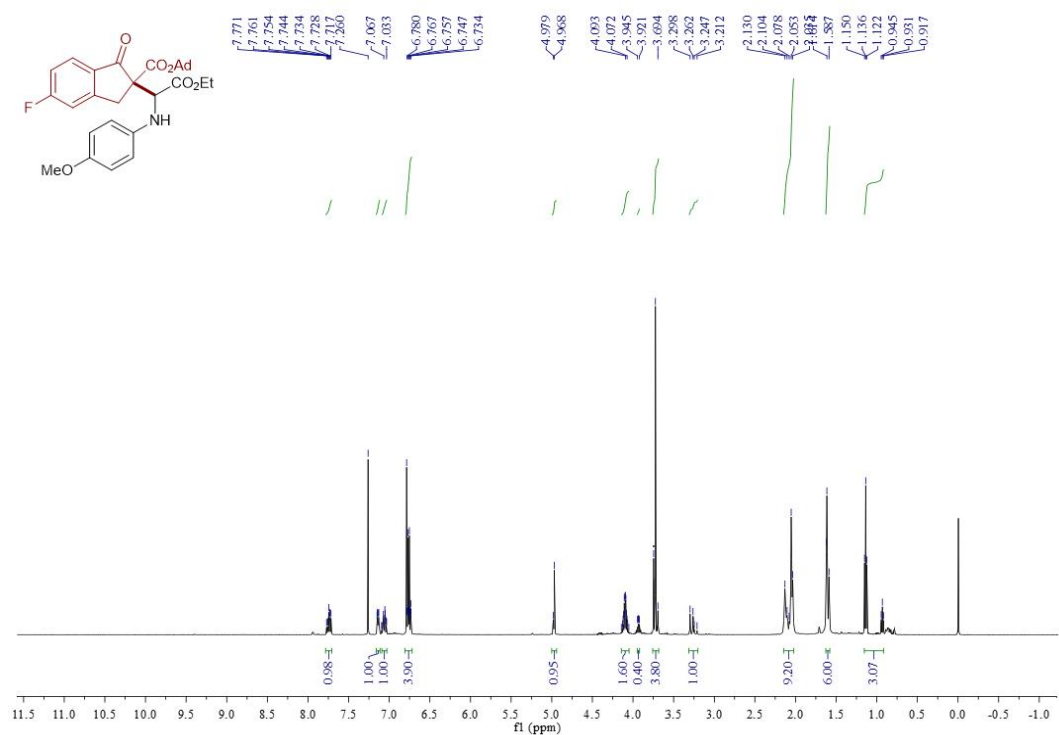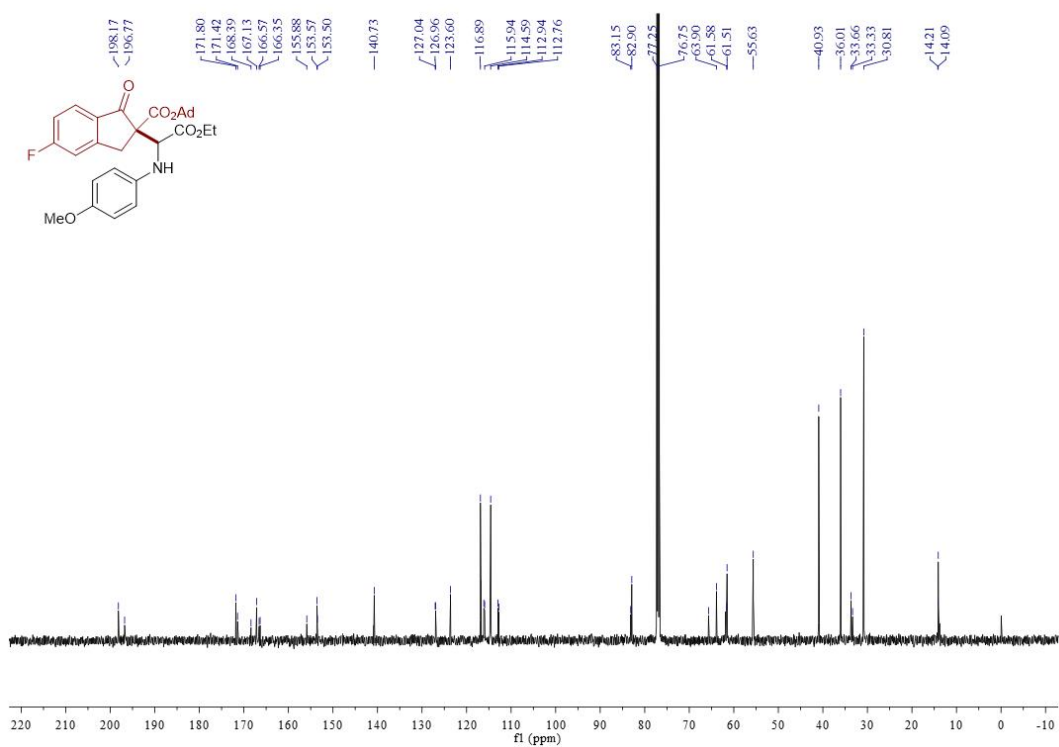

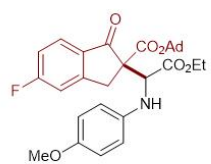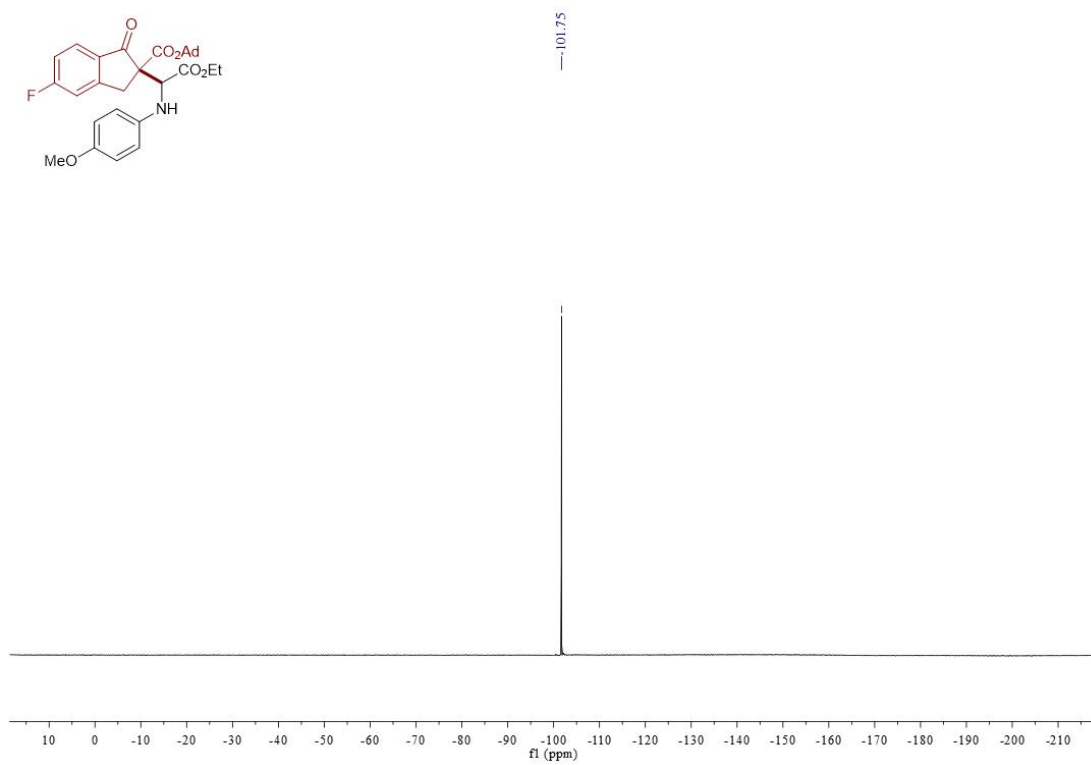

Adamantan-1-yl-5-bromo-2-(2-ethoxy-1-(4-methoxyphenyl) amino)-2-oxoethyl)-1-oxo-2,3-dihydro-1H-indene-2-carboxylate (3ca)

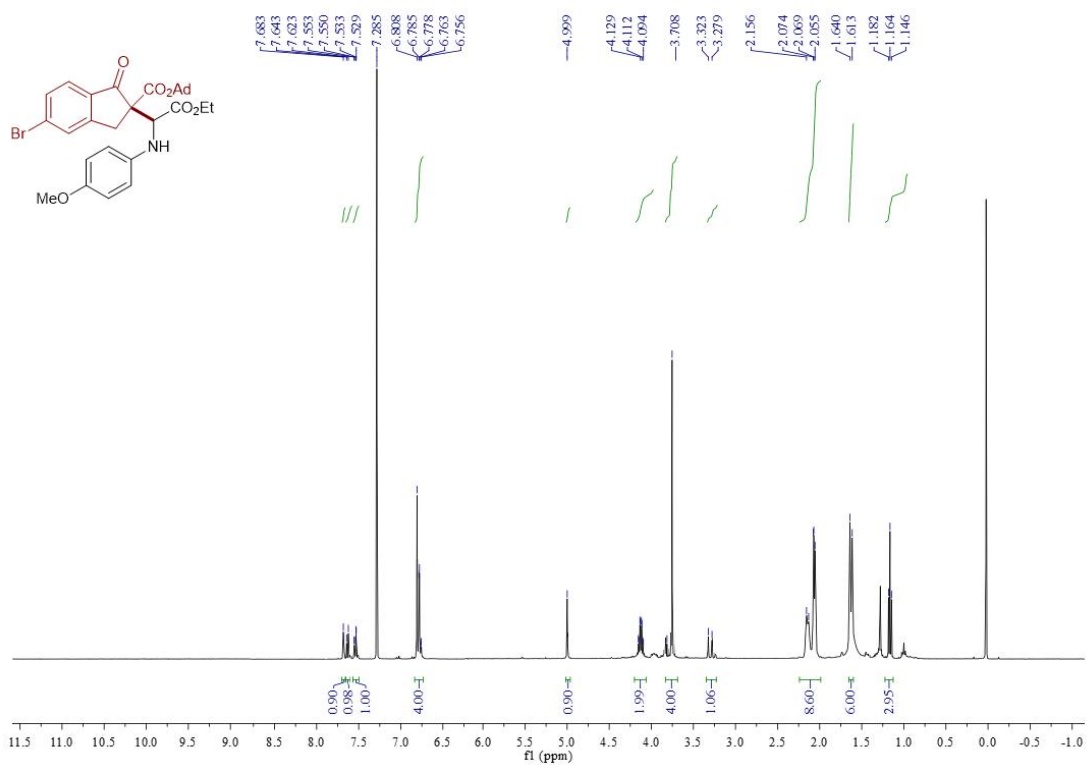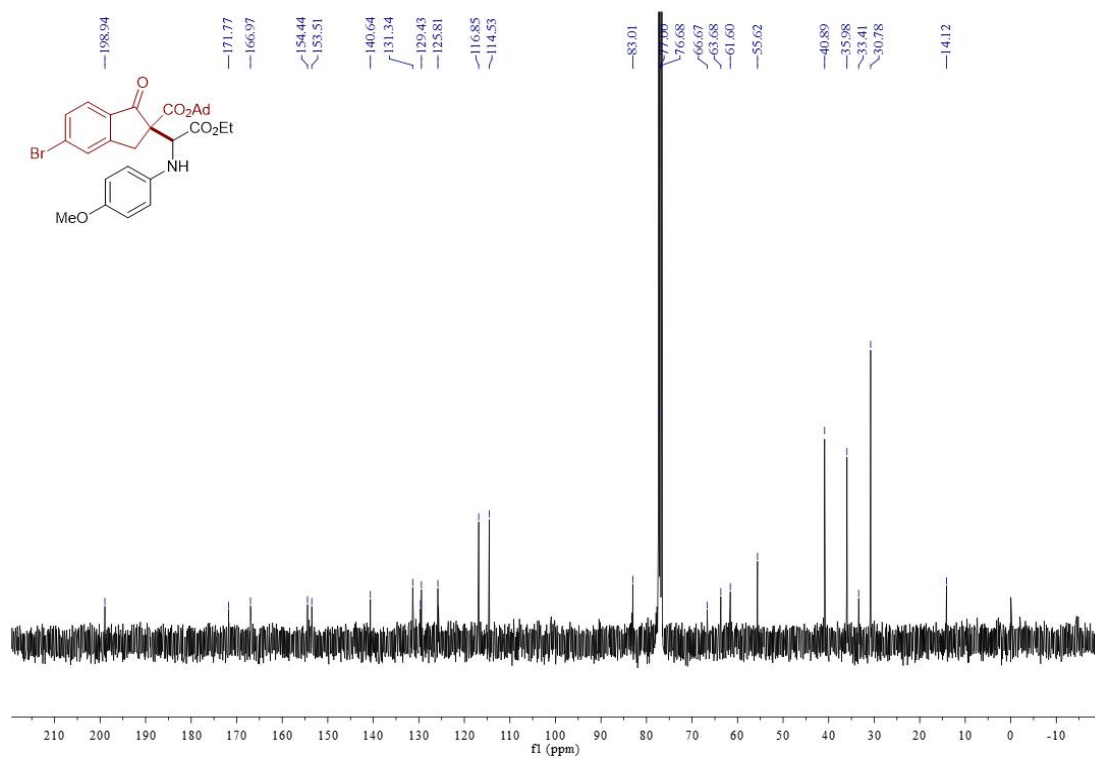

Adamantan-1-yl-2-(2-ethoxy-1-((4-methoxyphenyl)amino)-2-oxoethyl)-6-methyl-1-oxo-2,3-dihydro-1H-indene-2-carboxylate (**3da**)

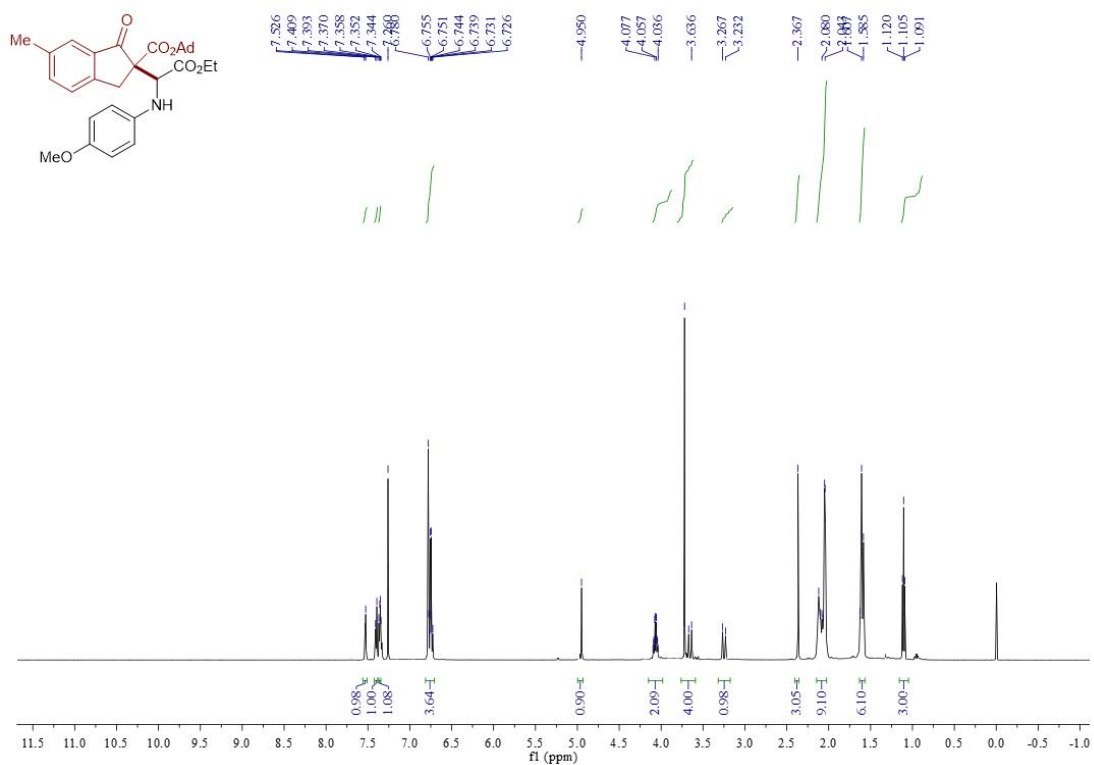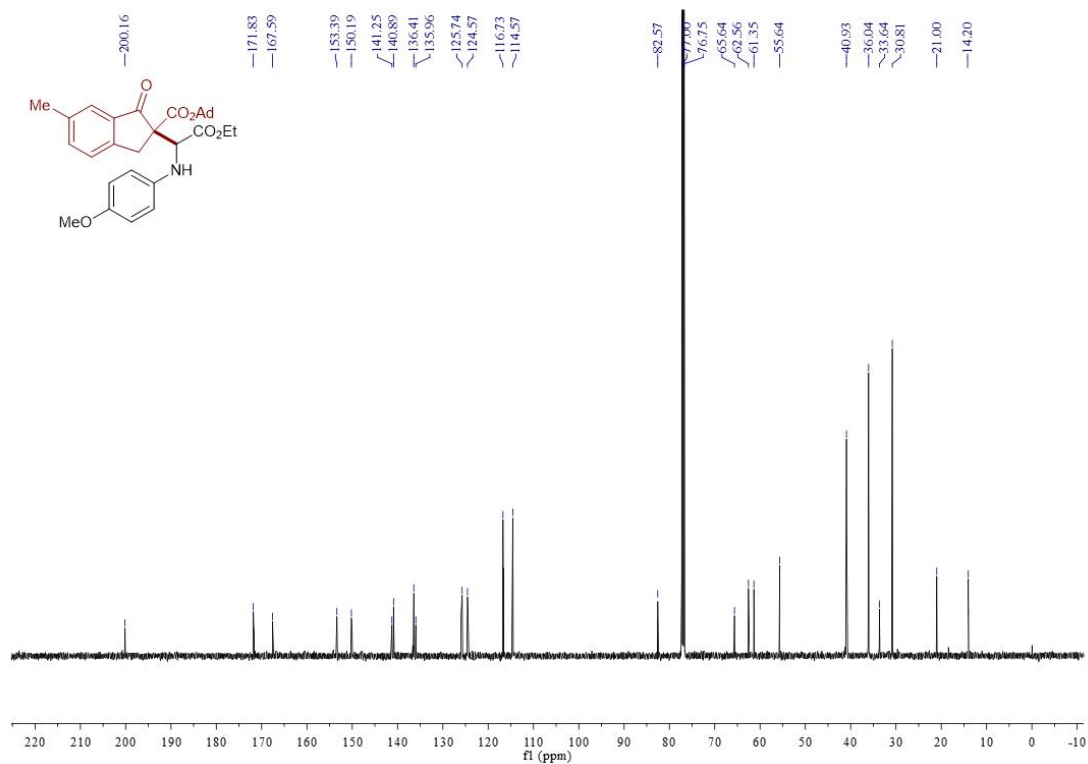

Adamantan-1-yl-2-(2-ethoxy-1-((4-methoxyphenyl)amino)-2-oxoethyl)-1-oxo-1,2,3,4-tetrahydronaphthalene-2-carboxylate (3ea)

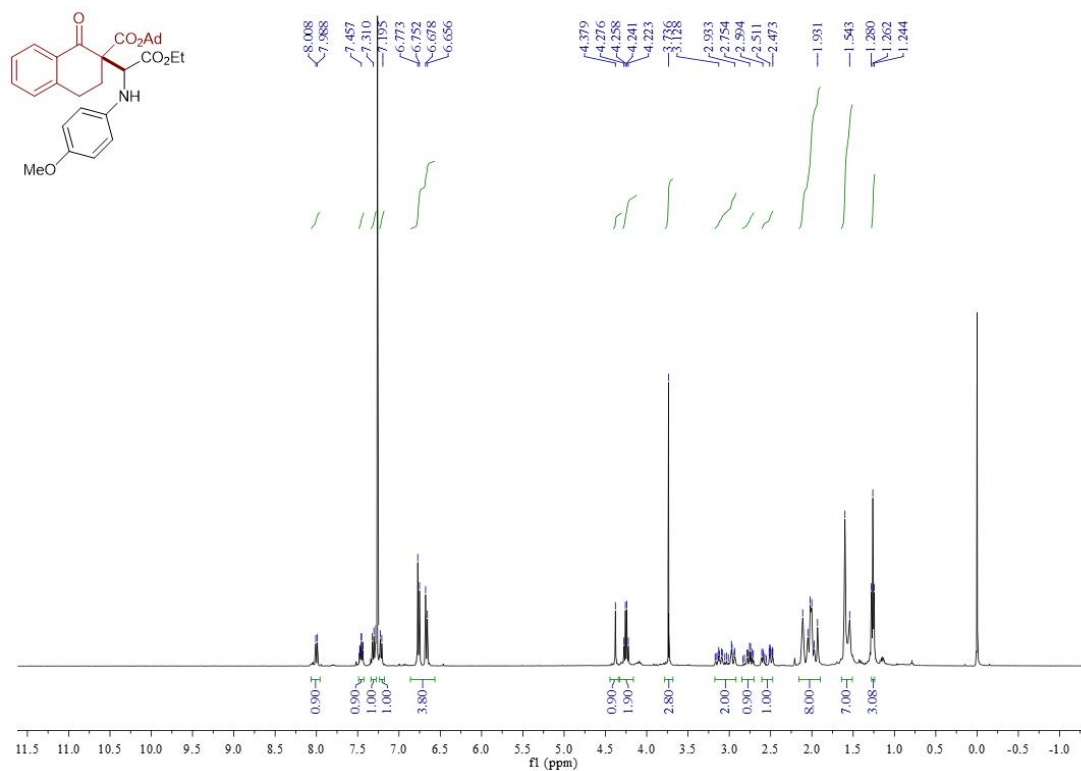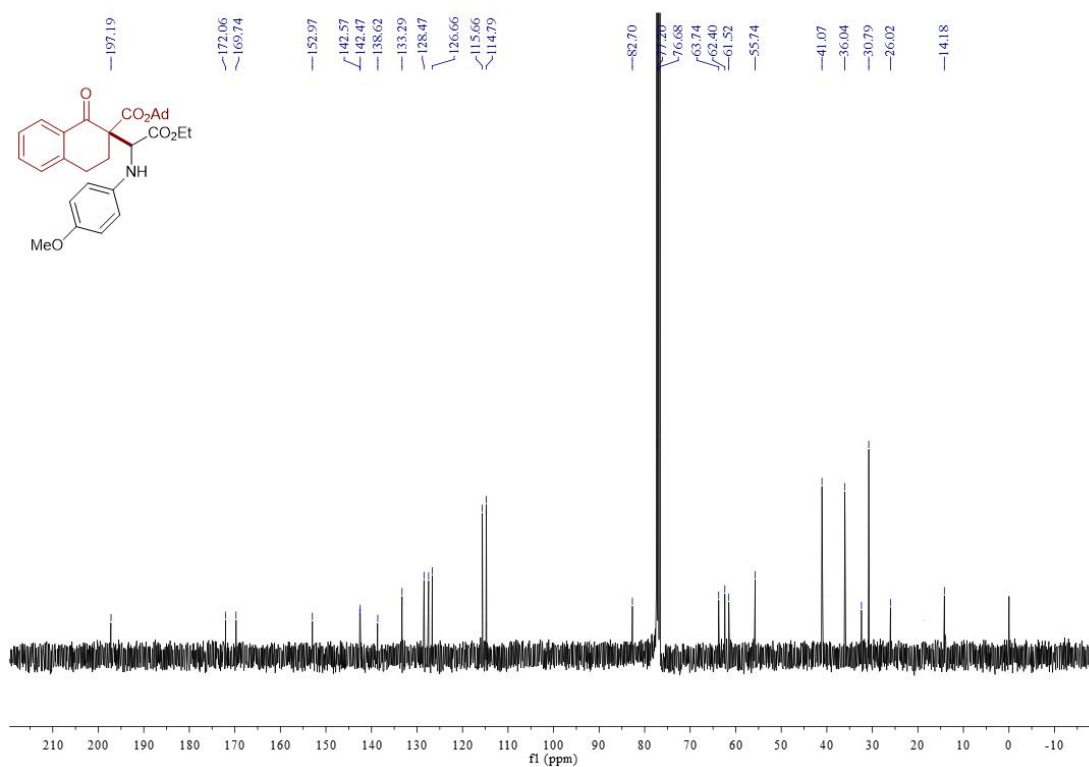

*Tert-butyl-2-(2-methoxy-1-((4-methoxyphenyl)amino)-2-oxoethyl)-1-oxo-2,3-dihydro-1H-indene-2-carboxylate (3fc)*

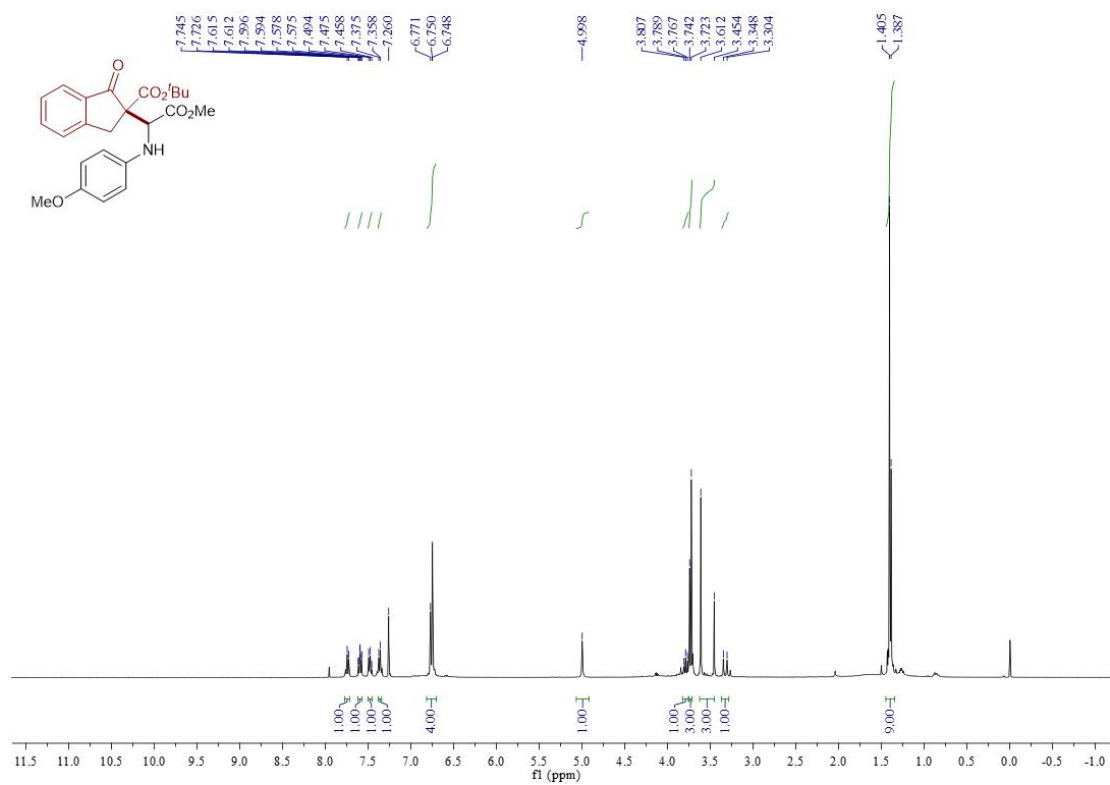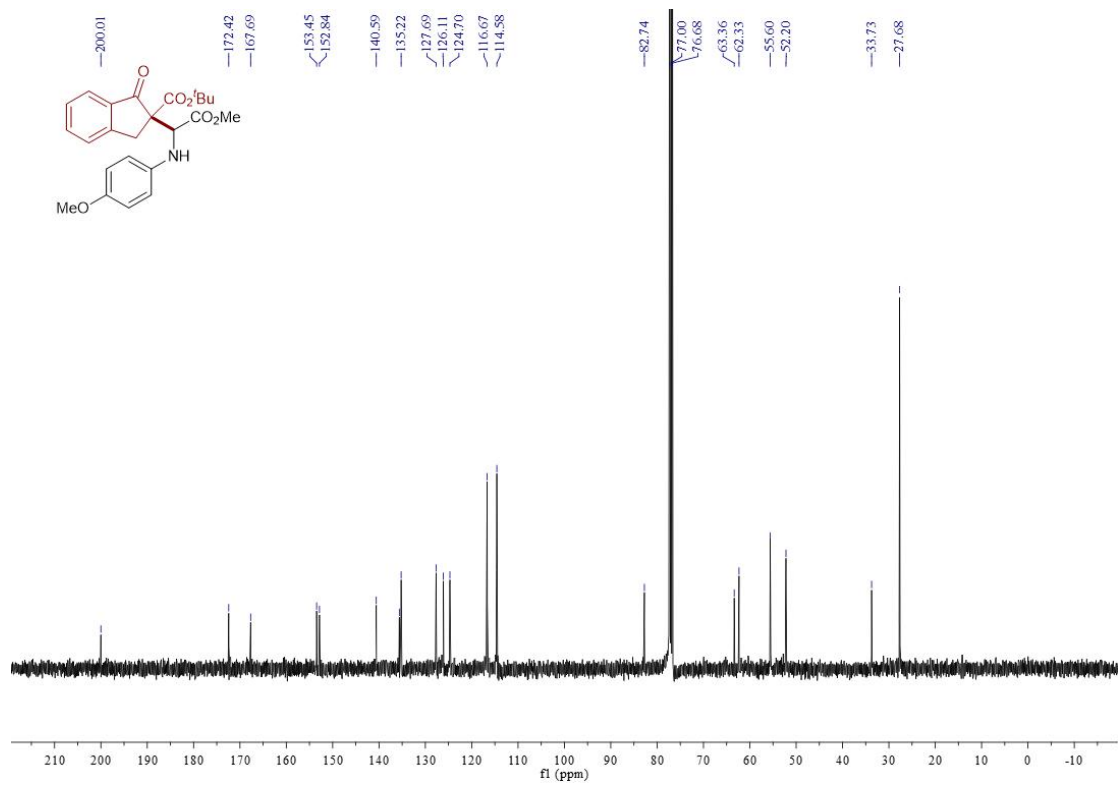

Methyl-2-(2-ethoxy-1-((4-methoxyphenyl)amino)-2-oxoethyl)-1-oxo-2,3-dihydro-1H-indene-2-carboxylate (3f'a)

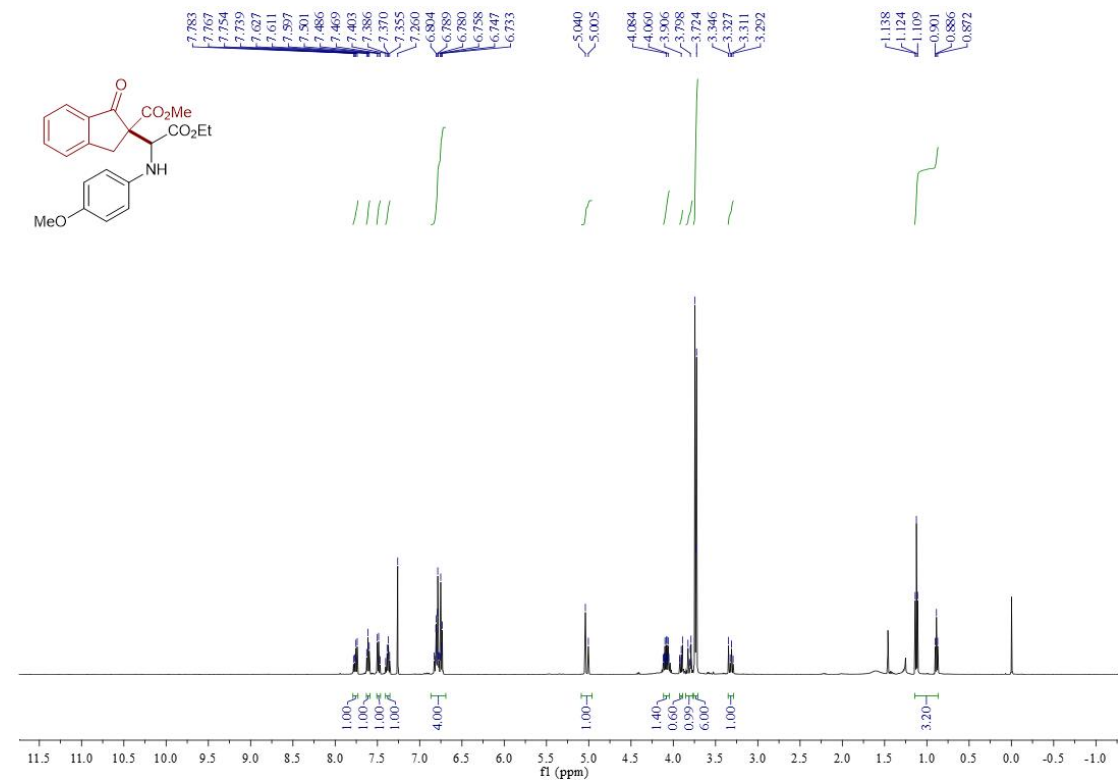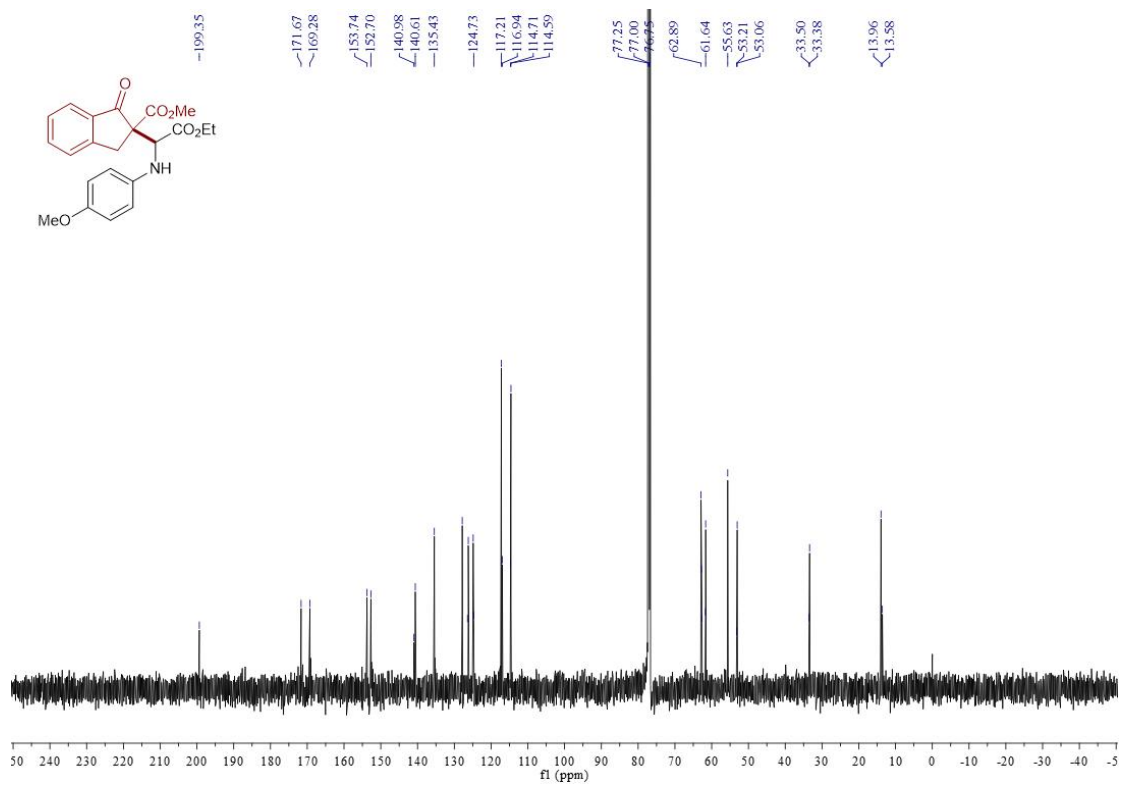



Adamantan-1-yl-1-(2-ethoxy-1-((4-methoxyphenyl)amino)-2-oxoethyl)-2-oxocyclopentane-1-carboxylate (**3ga**)

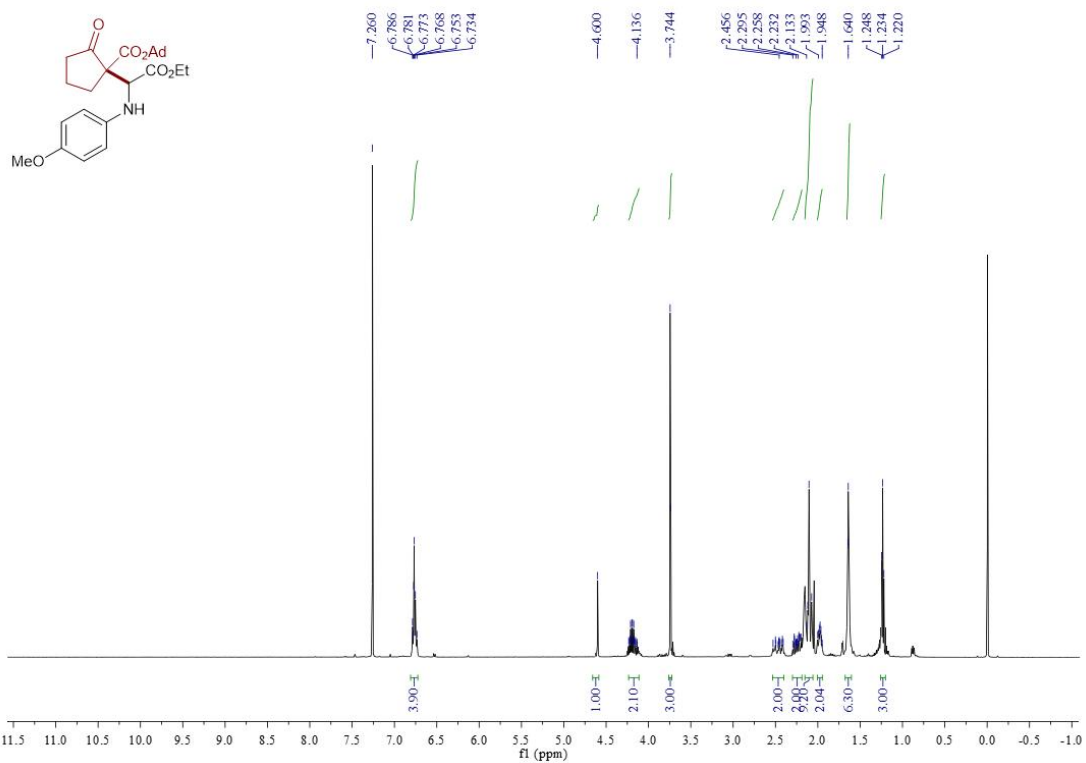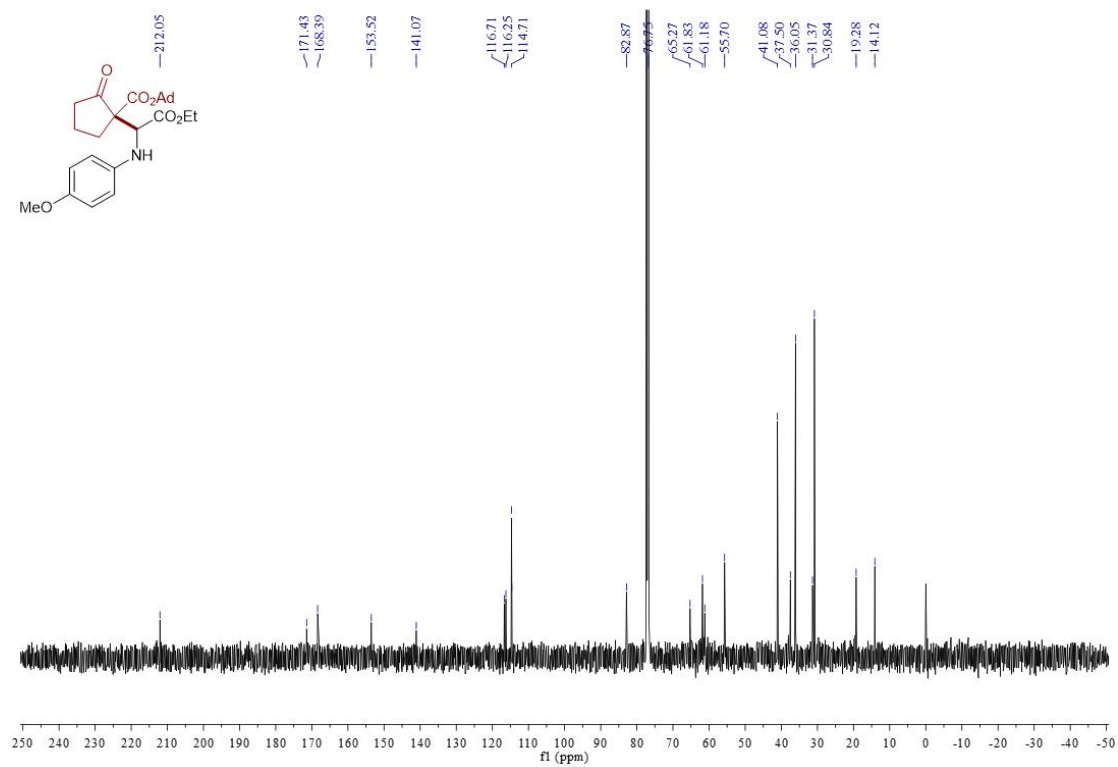

Adamantan-1-yl-1-(2-methoxy-1-((4-methoxyphenyl)amino)-2-oxoethyl)-2-oxocyclopentane-1-carboxylate (**3gc**)

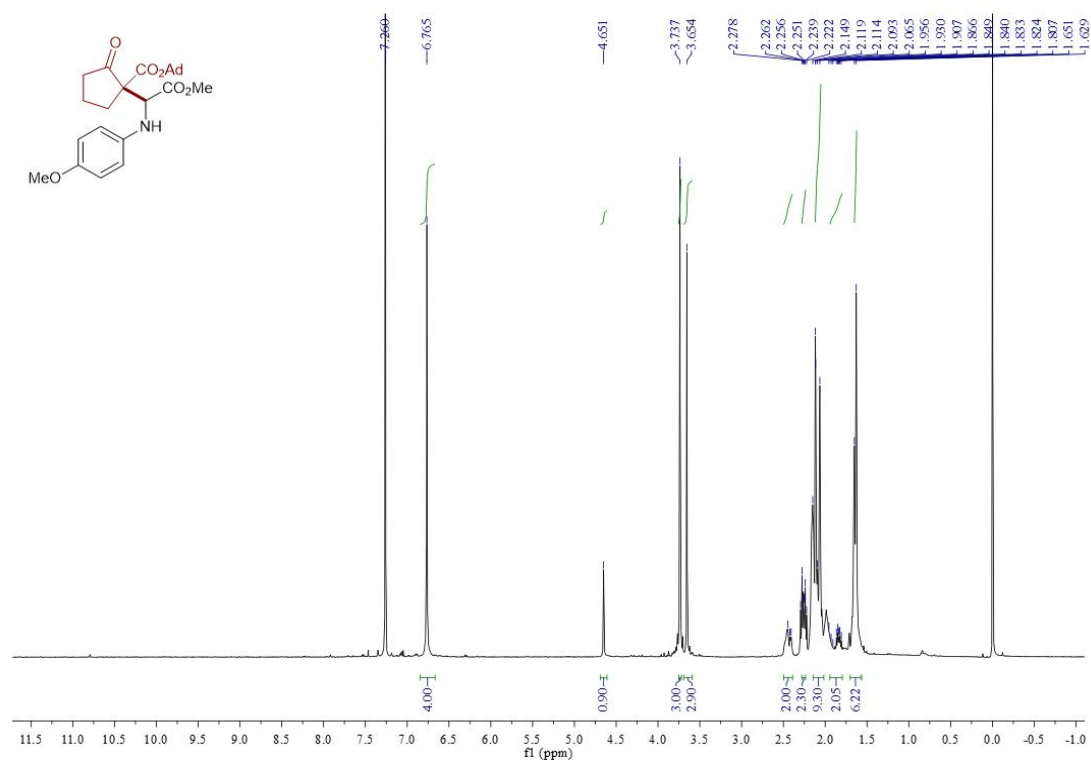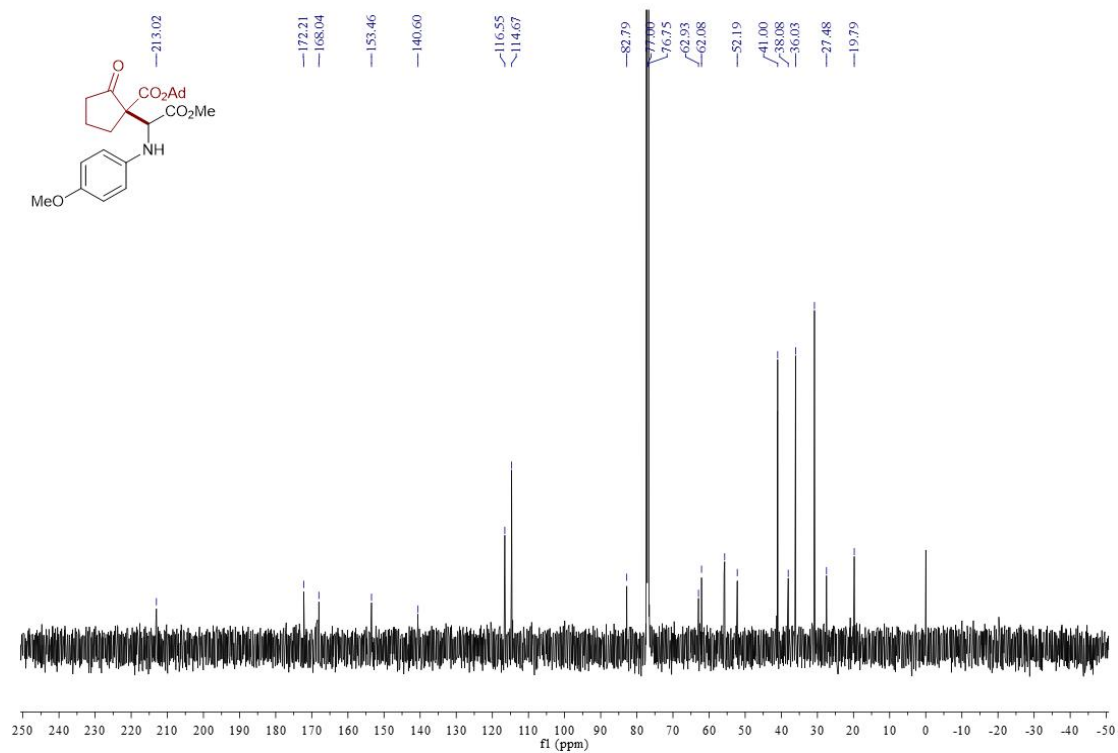

Adamantan-1-yl-2-(2-ethoxy-1-((4-methoxyphenyl)amino)-2-oxoethyl)-3-oxo-2,3 dihydrobenzofuran-2-carboxylate (**3ha**)

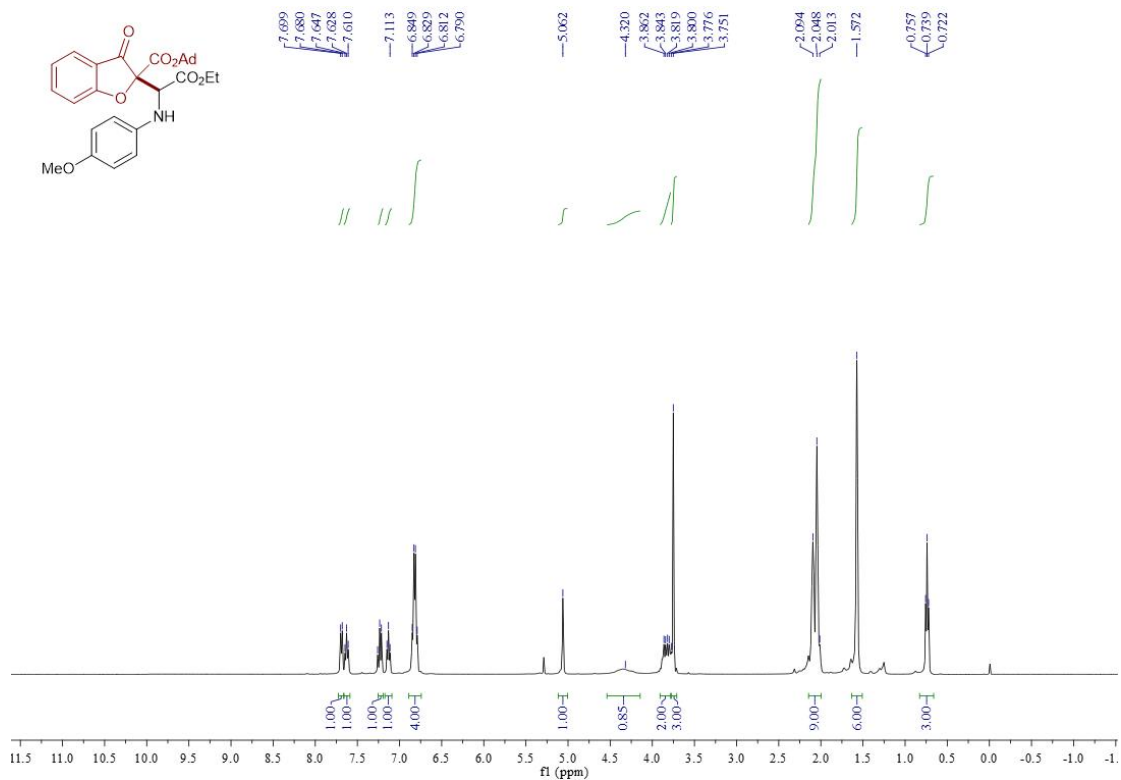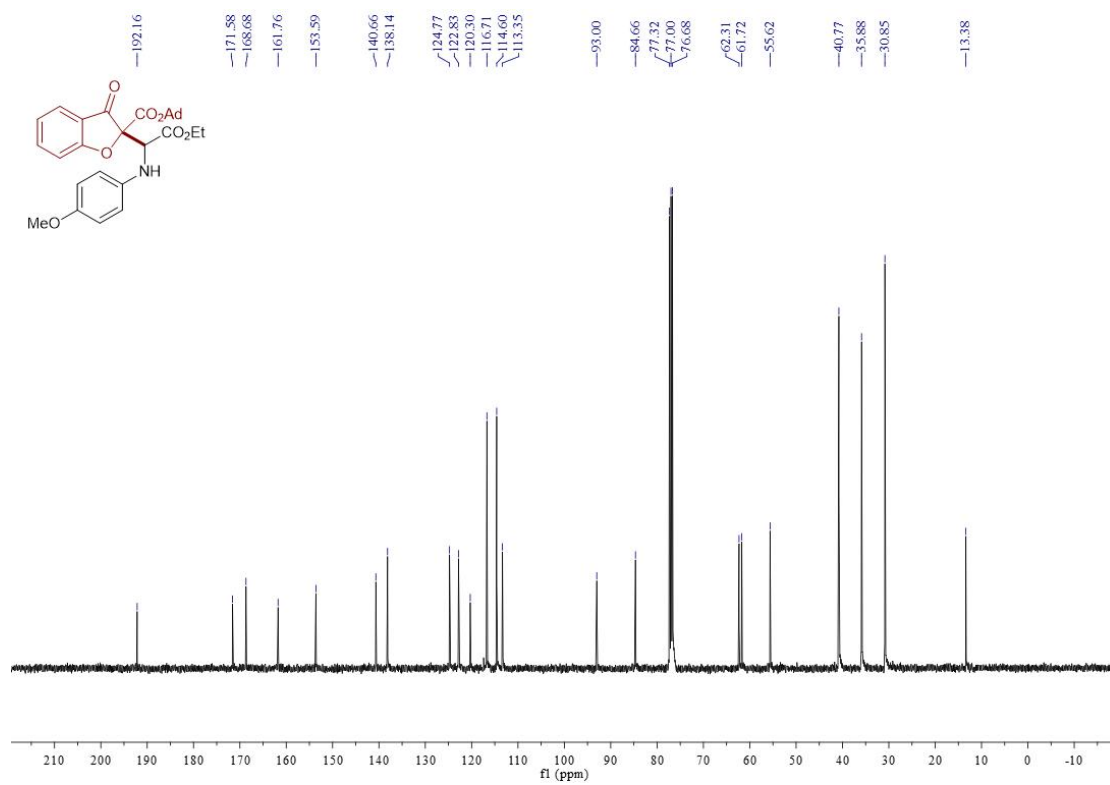

Adamantan-1-yl-2-((S)-2-ethoxy-2-oxo-1-(p-tolylamino)ethyl)-3-oxo-2,3-dihydrobenzofuran-2-carboxylate (**3hb**)

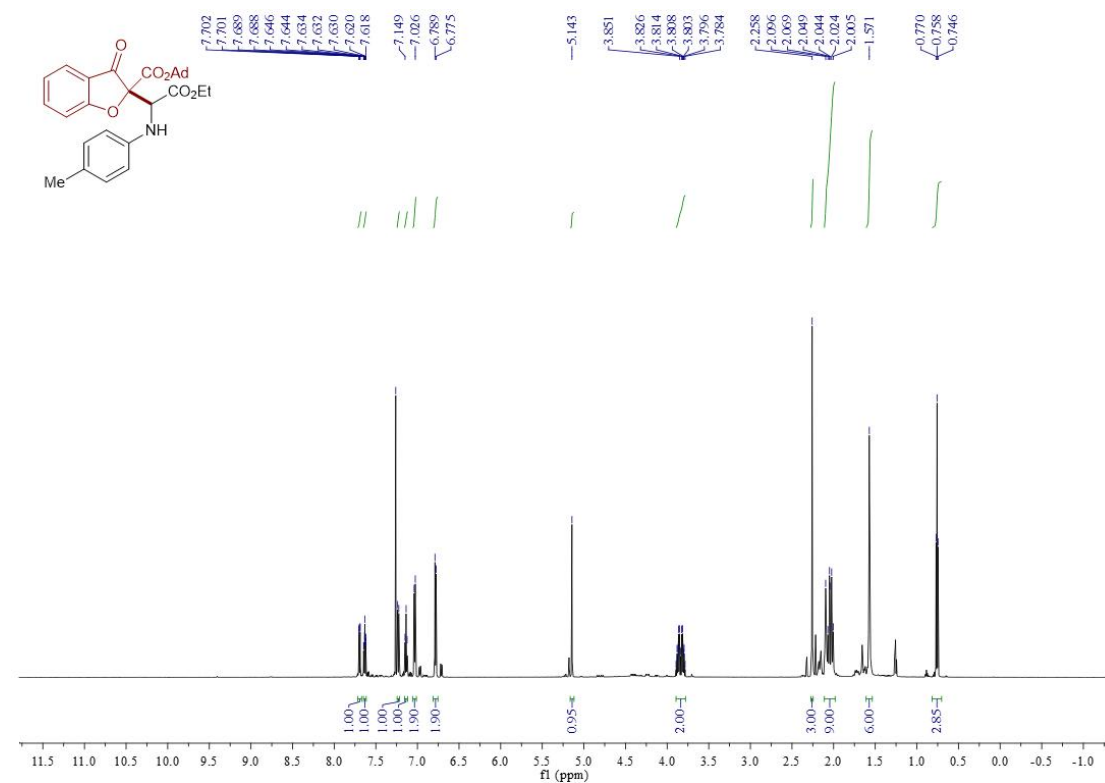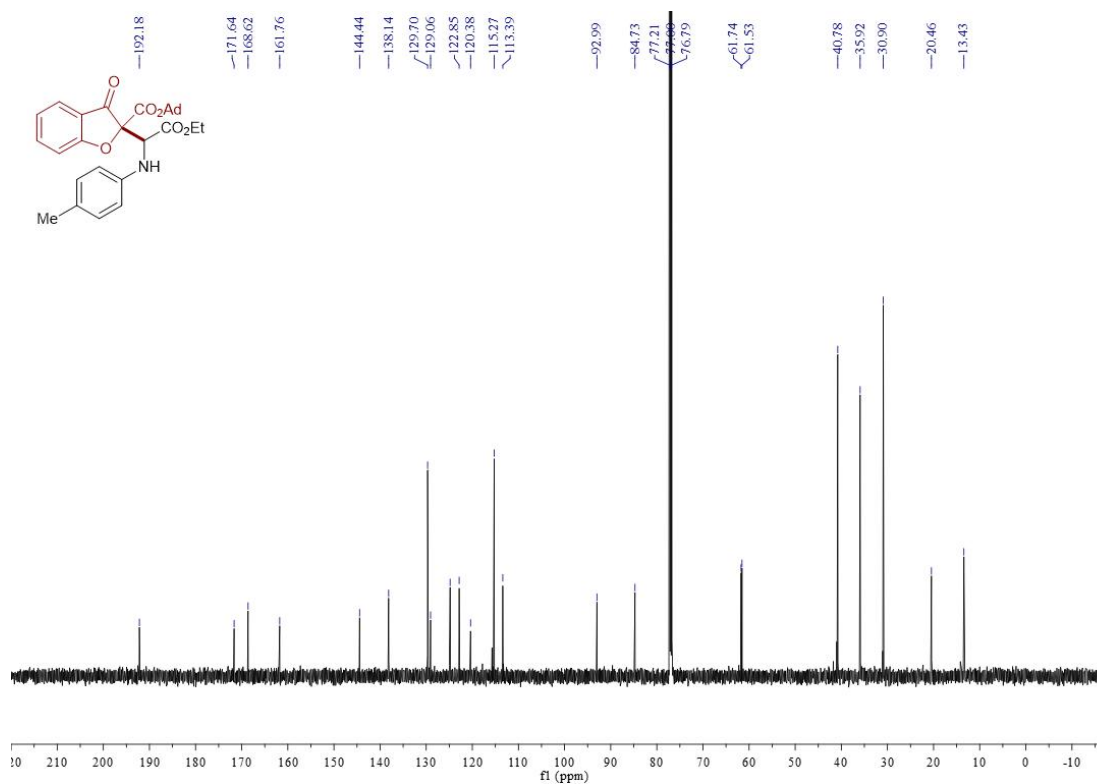

Adamantan-1-yl-2-(2-(tert-butoxy)-2-oxo-1-(p-tolylamino)ethyl)-3-oxo-2,3-dihydrobenzofuran-2-carboxylate (**3he**)

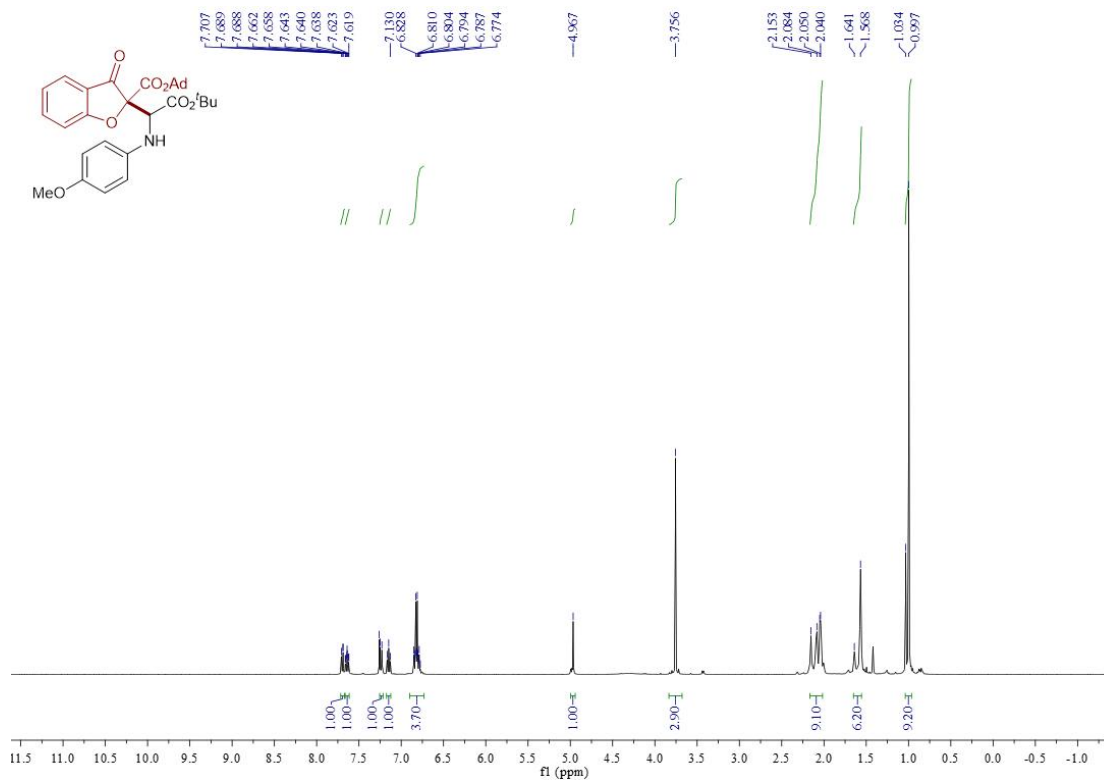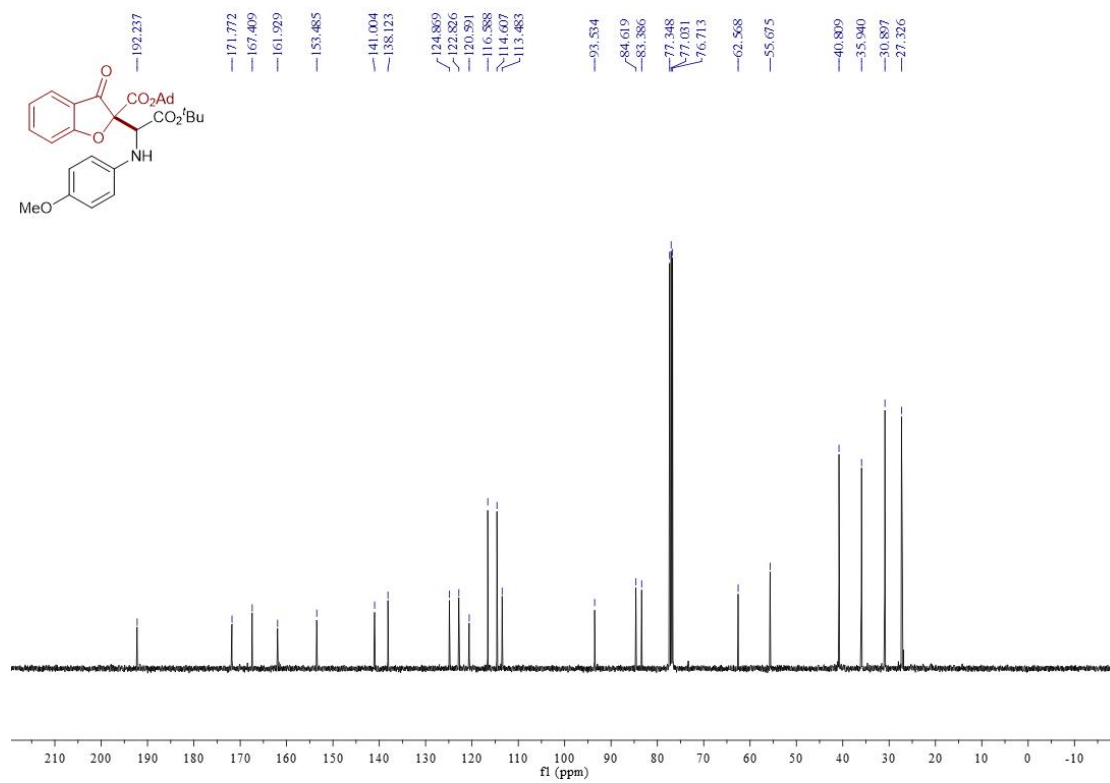

Adamantan-1-yl 2-(1-(4-bromophenyl)amino)-2-ethoxy-2-oxoethyl)-3-oxo-2,3-dihydrobenzofuran-2-carboxylate (**3hg**)

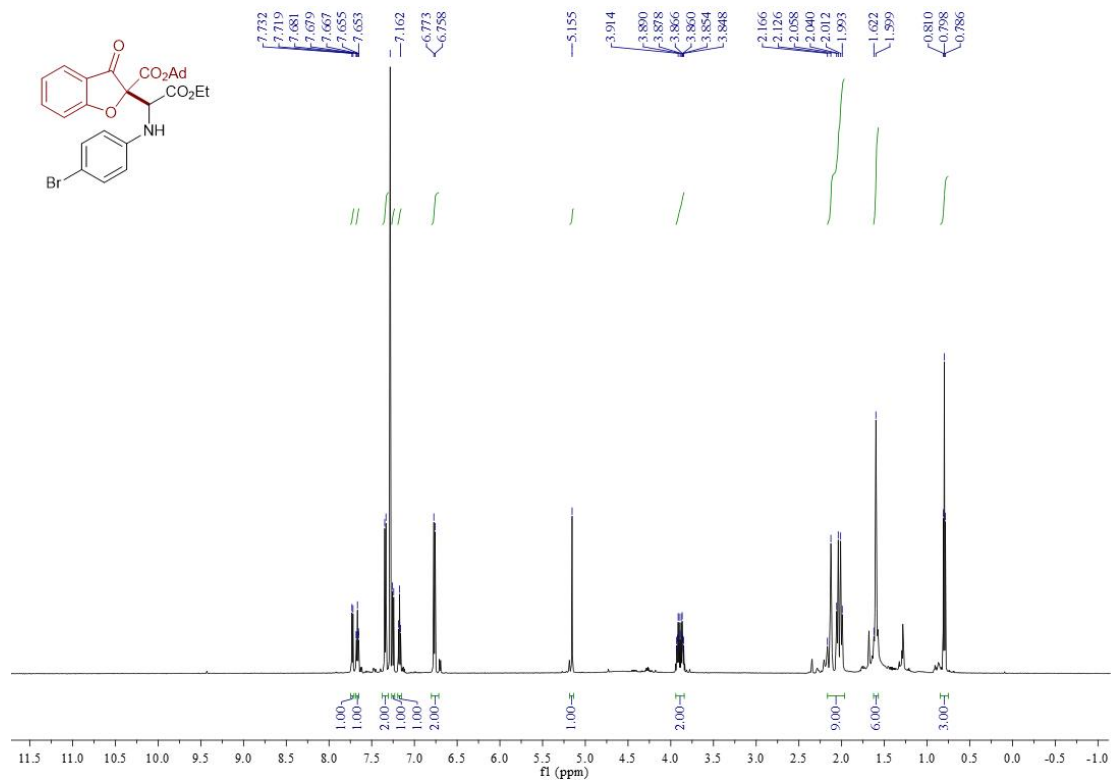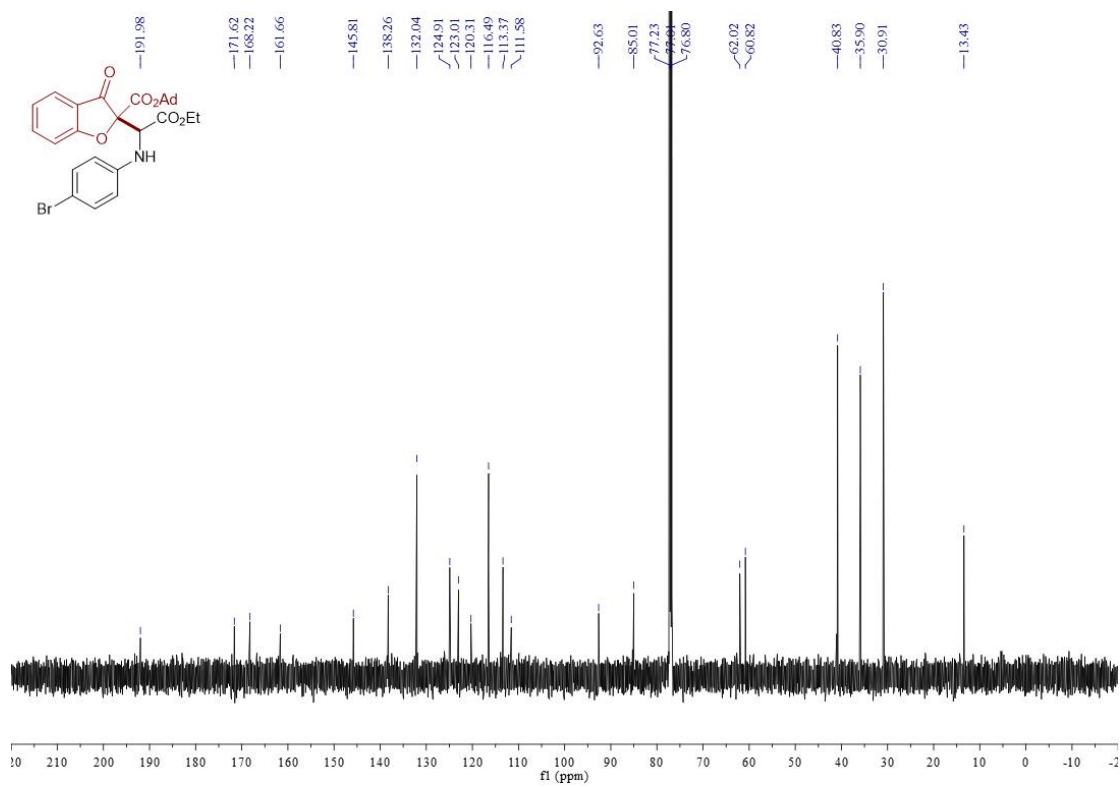

Adamantan-1-yl-6-bromo-2-(2-ethoxy-1-((4-methoxyphenyl)amino)-2-oxoethyl)-3-oxo-2,3-dihydrobenzofuran-2-carboxylate (**3ia**)

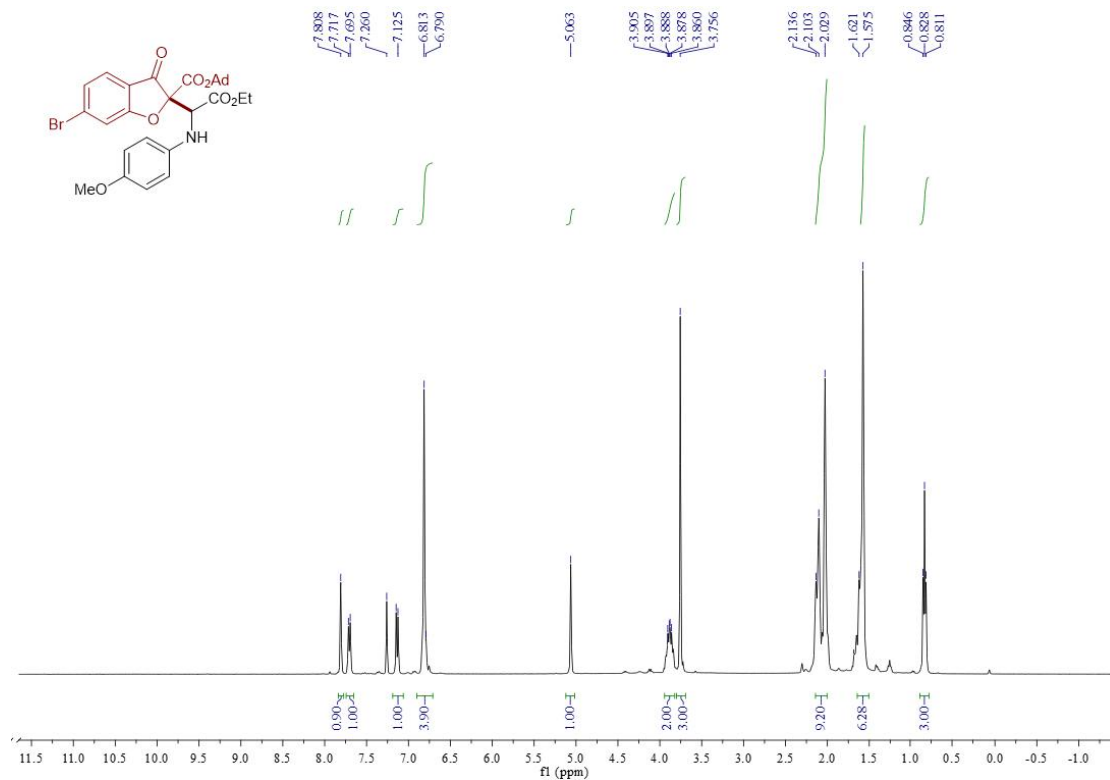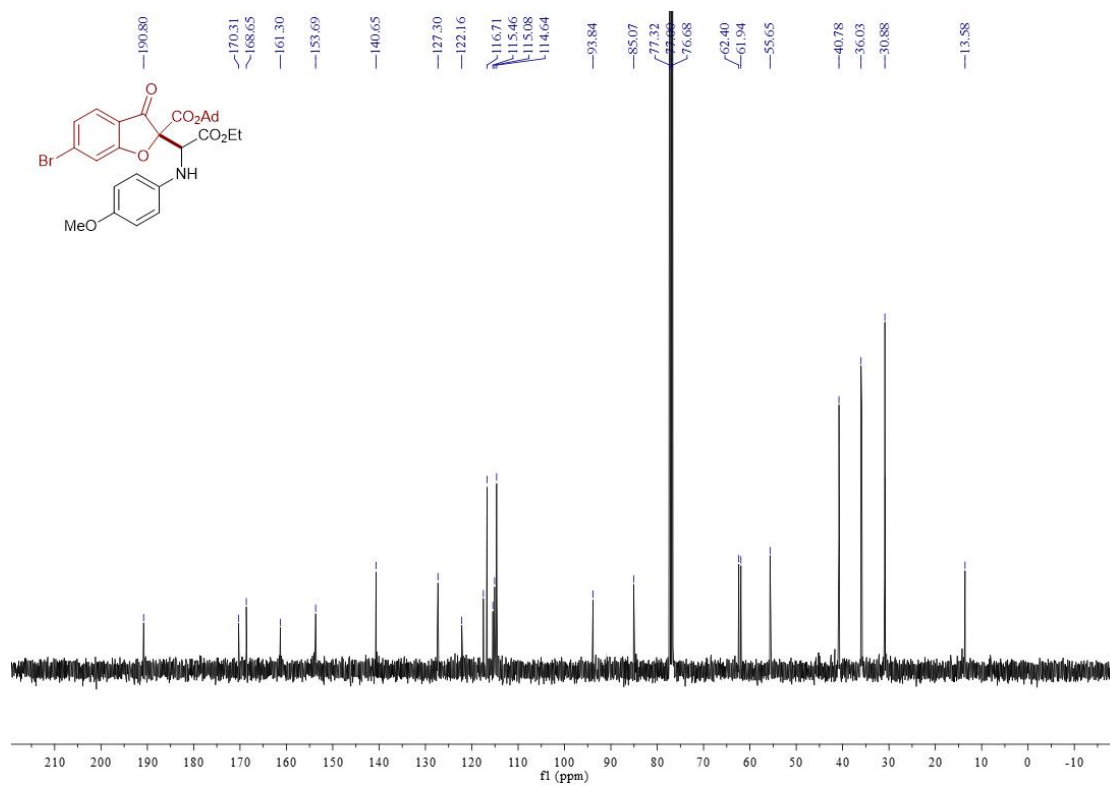

Adamantan-1-yl-2-(2-ethoxy-1-((4-methoxyphenyl)amino)-2-oxoethyl)-5-methyl-3-oxo-2,3-dihydrobenzofuran-2-carboxylate (**3ja**)

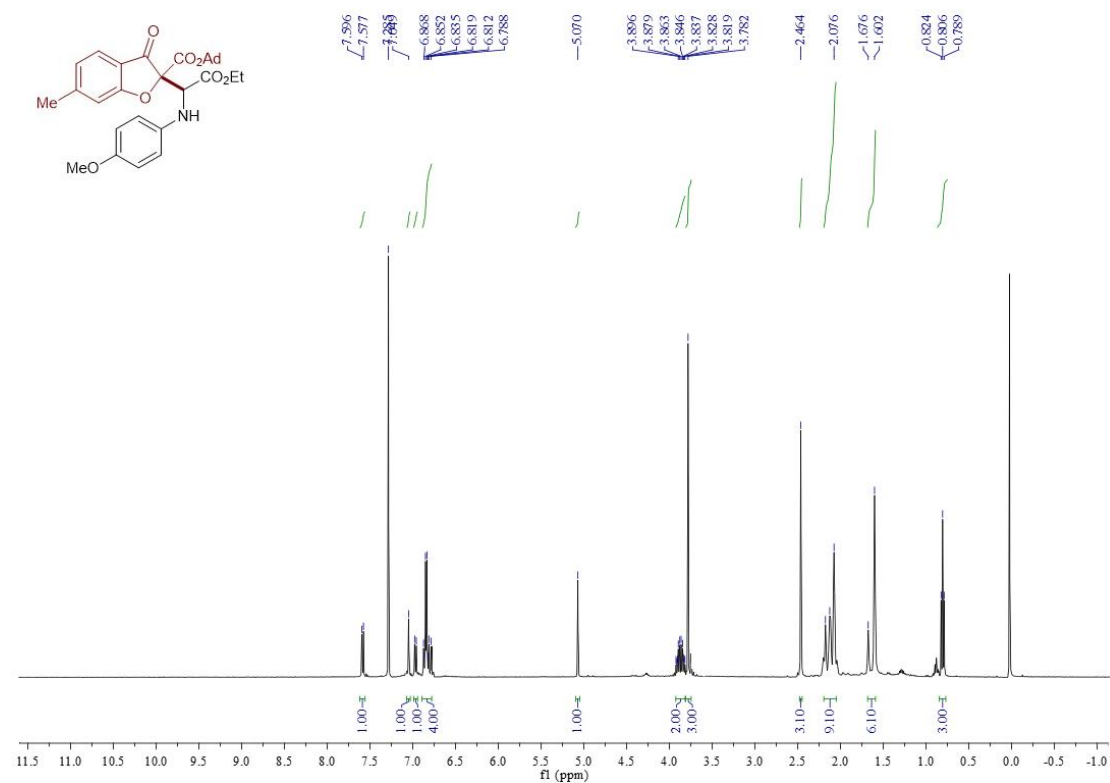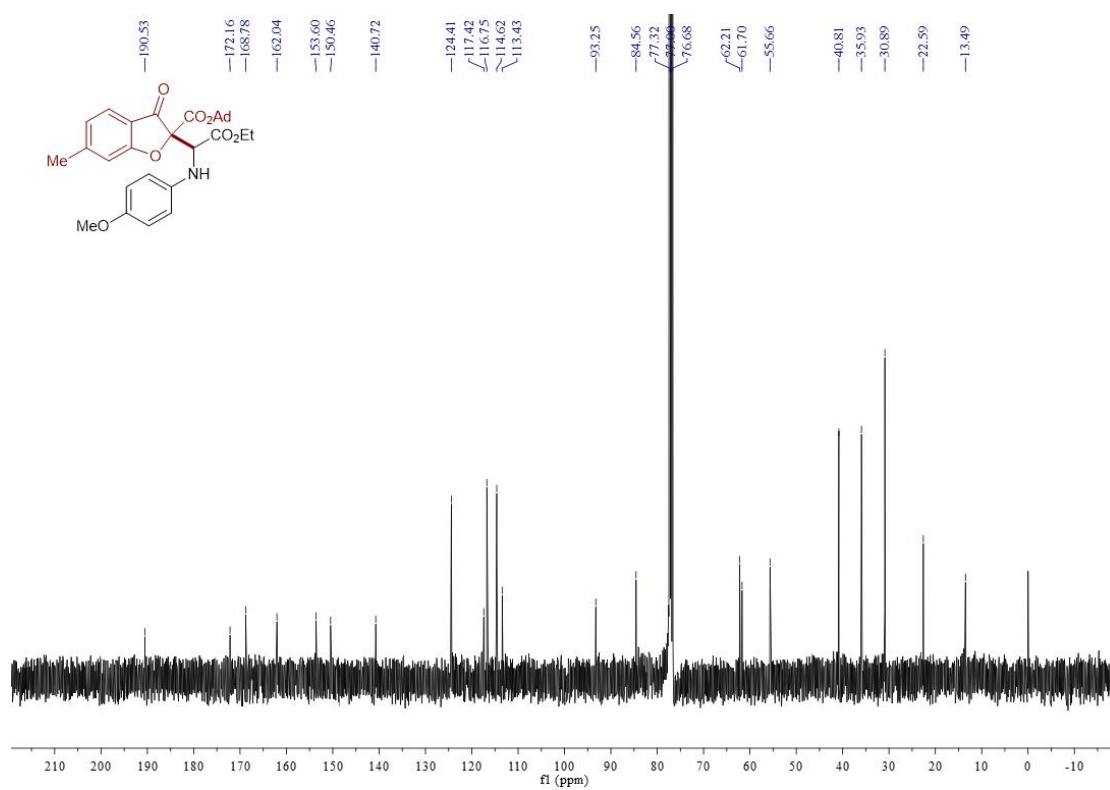



Adamantan-1-yl-2-(2-ethoxy-1-(4-methoxyphenyl)amino)-2-oxoethyl)-5-fluoro-3-oxo-2,3-dihydrobenzofuran-2-carboxylate (**3ka**)

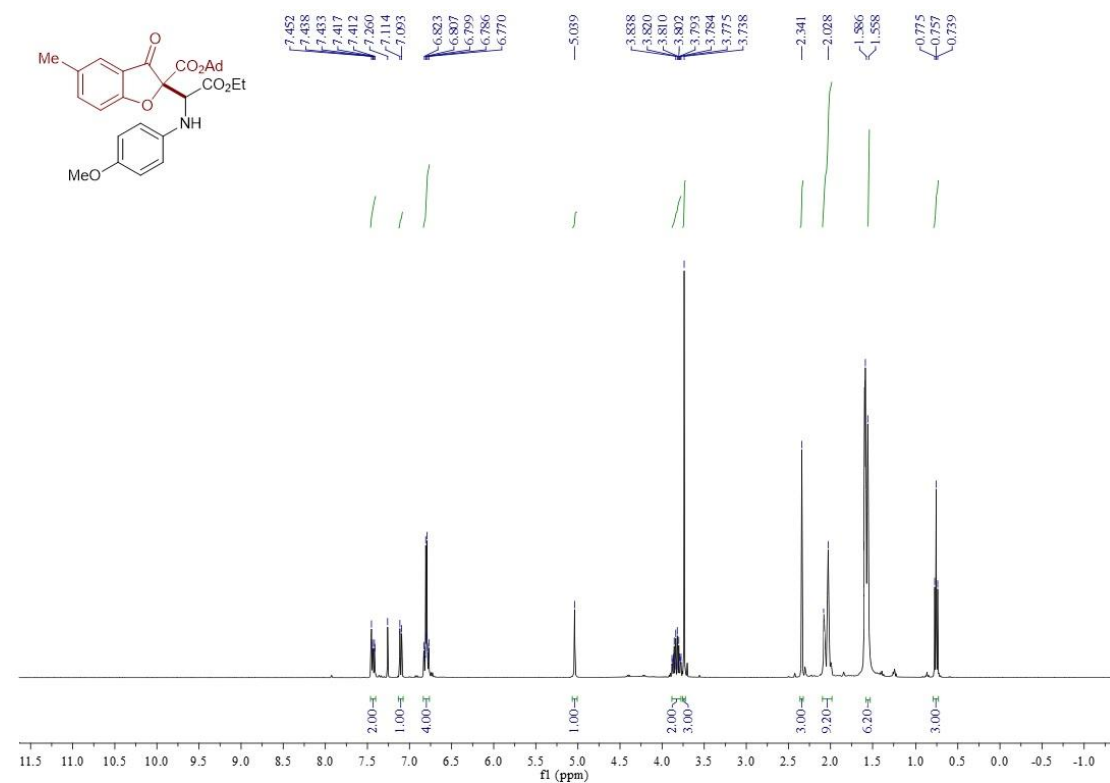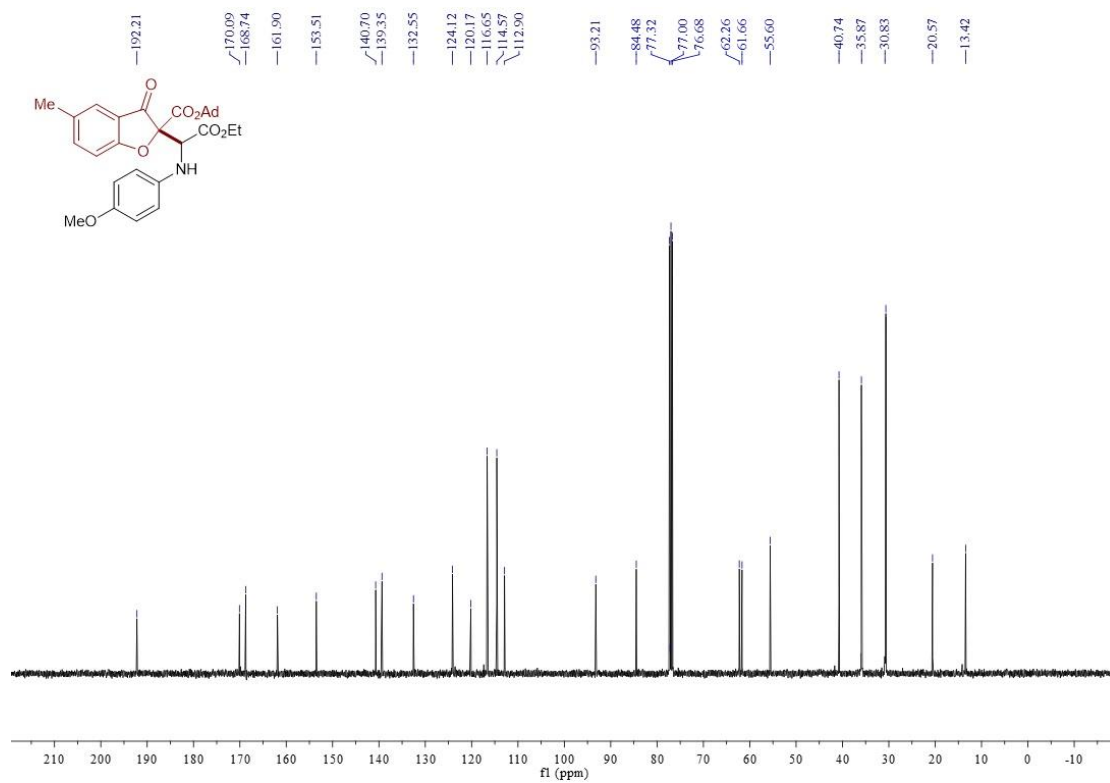

Adamantan-1-yl-2-(2-ethoxy-1-((4-methoxyphenyl)amino)-2-oxoethyl)-5-fluoro-3-oxo-2,3-dihydrobenzofuran-2-carboxylate (31a)

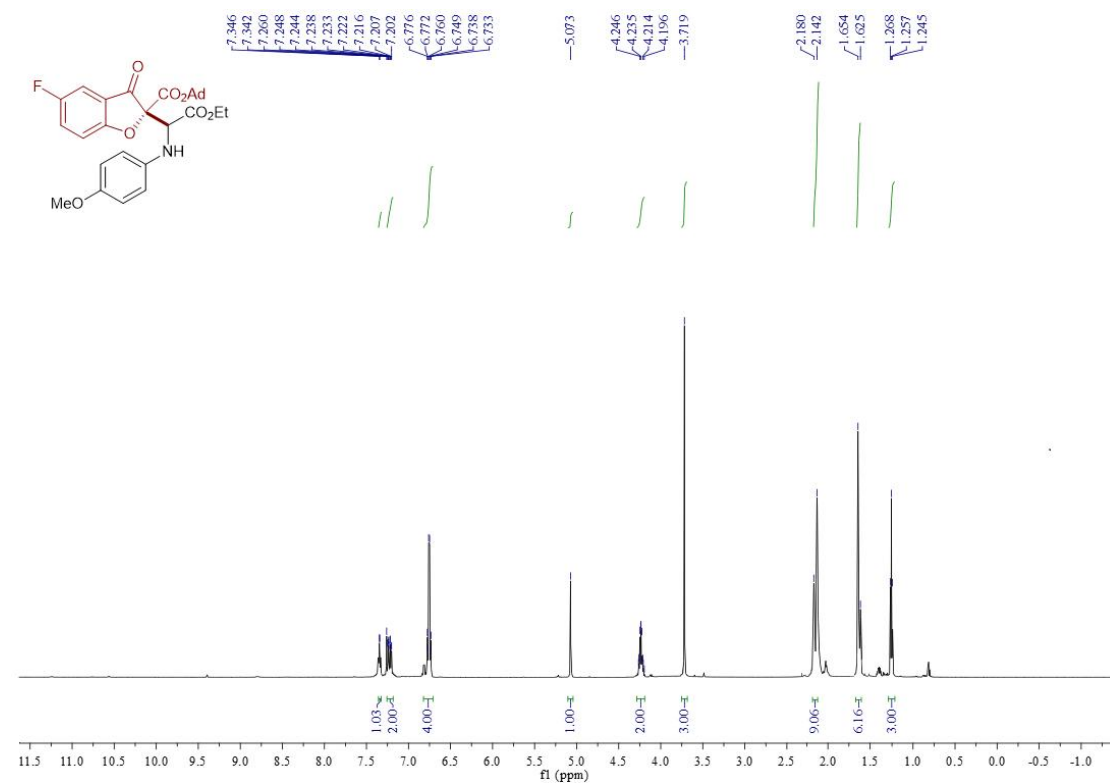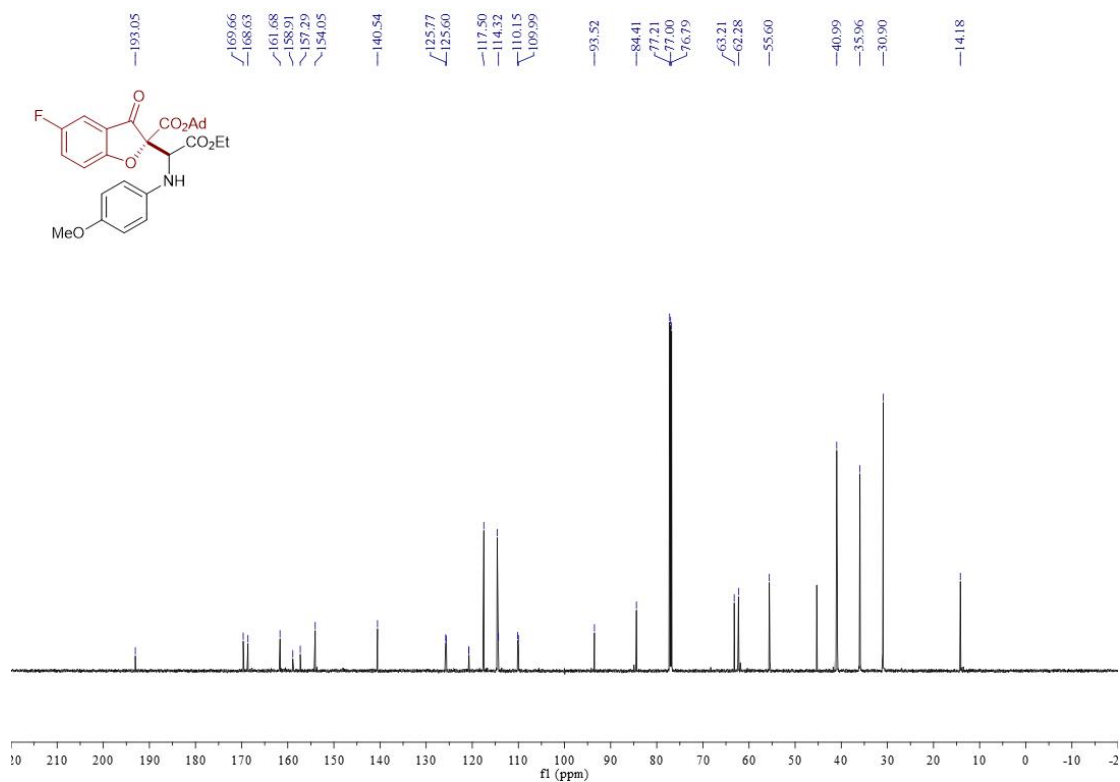

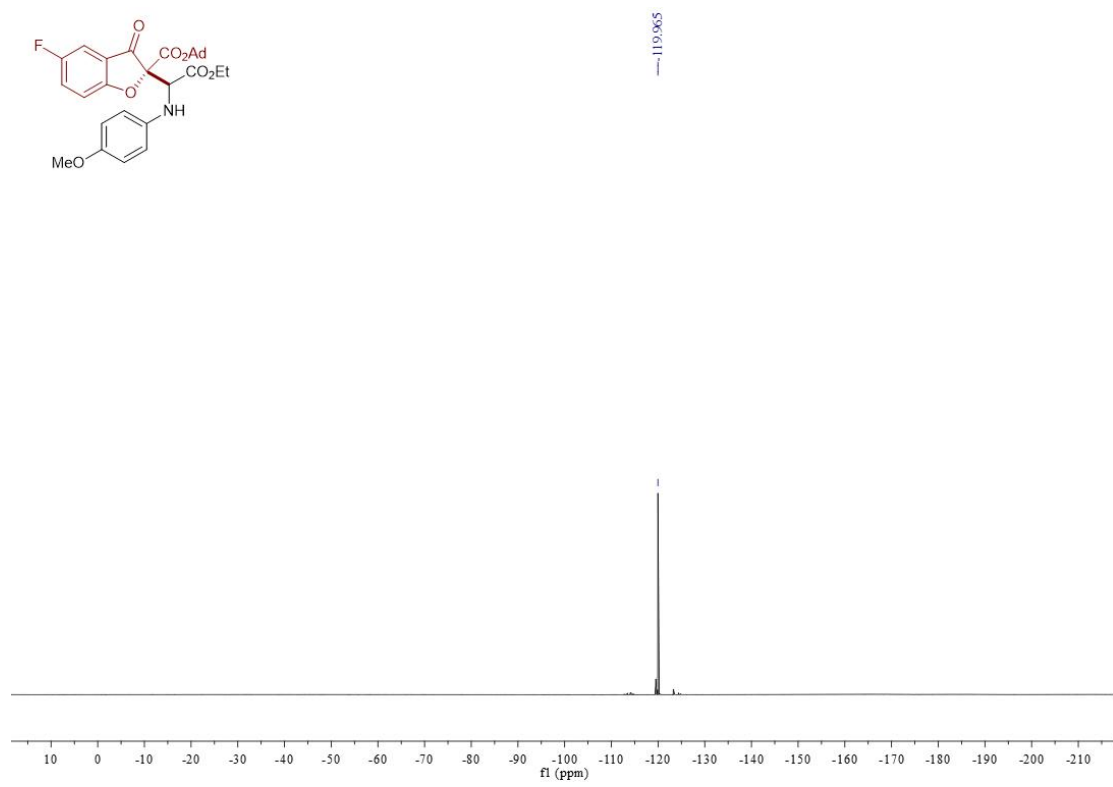

## 9. DFT Computations

### 9.1 Computational details

The computations were performed using the Gaussian 16 software package<sup>11</sup>. The PBE0 functional<sup>12</sup> was adopted for all calculations in combination with the D3BJ dispersion correction<sup>13</sup>. During the geometry optimization and frequency calculations, the def2SVP basis set<sup>14</sup> was used to treat Fe, and 6-31G(d)<sup>15,16</sup> was employed for most of the organic and ligand atoms<sup>15,16</sup>. To simplify the calculation, the 3-21G basis set<sup>17</sup> was used to treat the cyclohexyl group of the ligand and the two *tert*-butyl groups of the ligand that distant from the Fe center (noted as the uninterested area). The singlet point energy calculations were performed with a larger basis set combination, in which the def2-TZVP basis set<sup>14</sup> was used for Fe, 6-31G(d) for the uninterested area, and 6-311+G(d,p)<sup>18,19</sup> for others. The free energy was obtained by adding the single point energy to the thermal correction to the Gibbs free energy ( $G = E_{\text{PBE0}} + G_{\text{corr}}$ ). All calculated structures were illustrated using CYLview<sup>20</sup> software.

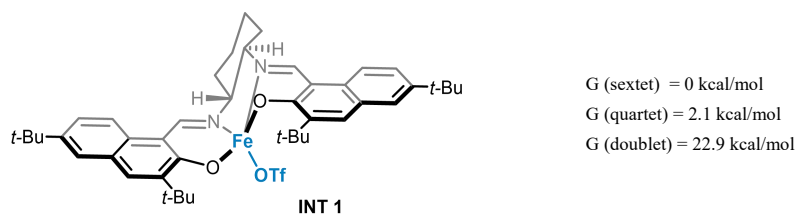

The ground state of the pre-catalyst **INT 1** was determined to be sextet, with a quartet state close in Gibbs free energy (2.1 kcal/mol relative to the sextet). The doublet state lies 22.9 kcal/mol above the sextet state.

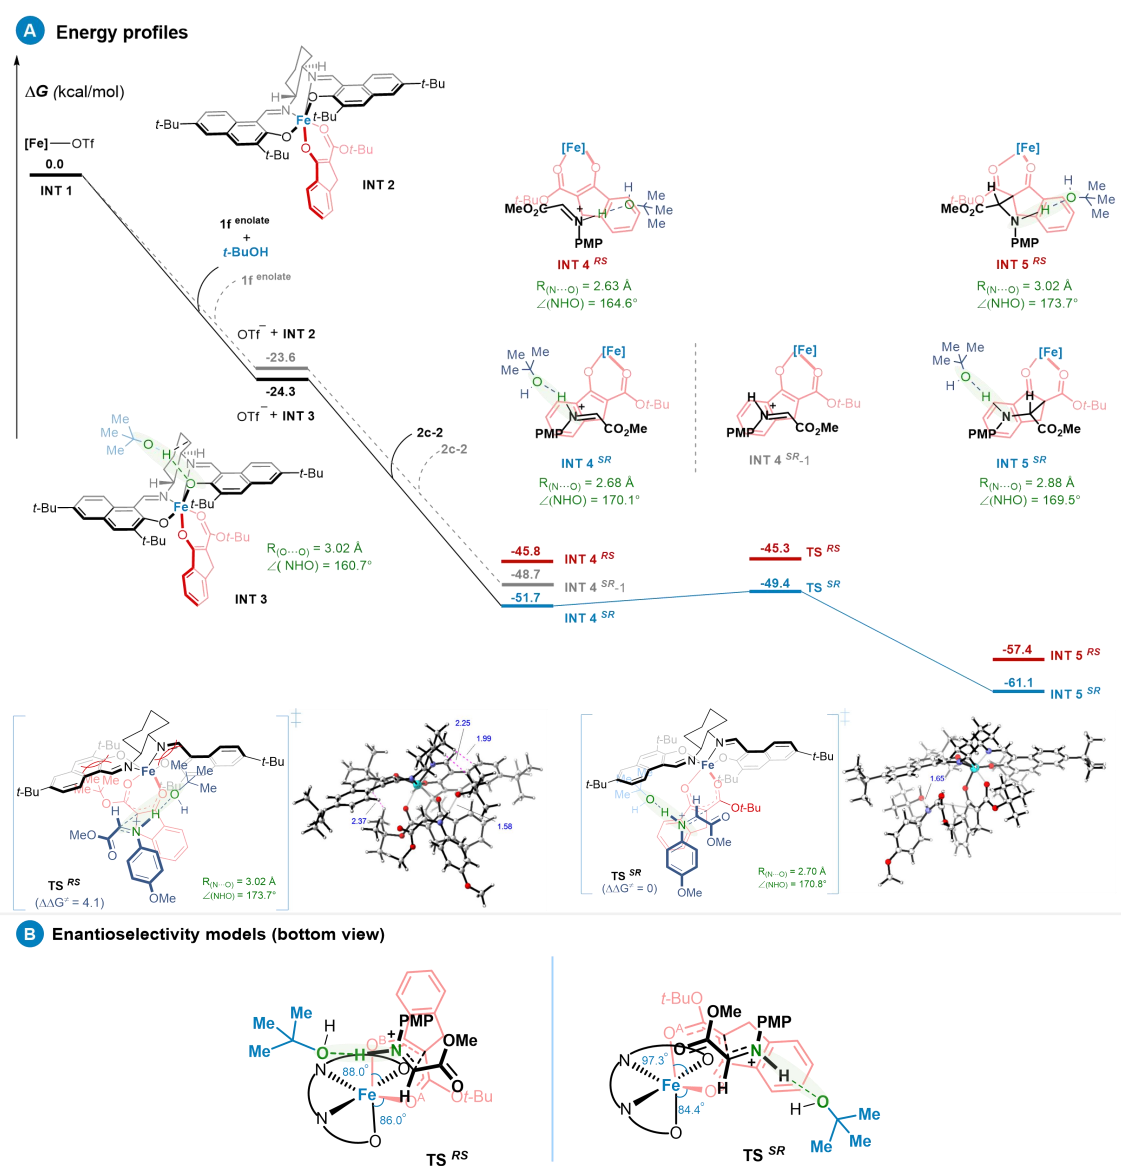

**Figure S3.** (A) Energy profiles for the asymmetric catalyzed oxidative cross-coupling of **1f** and **2c** after formation of enolate-**1f** and iminium **2c-2**. (B) Enantioselectivity models (bottom view).

### 9.2 Cartesian Coordinates

**Table S7.** Coordinates (x,y,z), energy (Hartree) and imaginary frequency ( $\text{cm}^{-1}$ ) of the computed species displayed in **Figure 6** and **Figure S3** of the manuscript.

| INT 1_sextet                                                                      |           |           |           | INT 1_quartet                                                                      |           |           |           |
|-----------------------------------------------------------------------------------|-----------|-----------|-----------|------------------------------------------------------------------------------------|-----------|-----------|-----------|
| 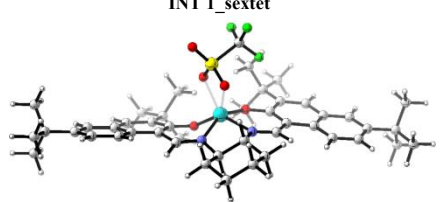 |           |           |           |  |           |           |           |
| E(UPBE1PBE) = -4193.104406                                                        |           |           |           | E(UPBE1PBE) = -4193.103565                                                         |           |           |           |
| Thermal correction to Gibbs Free Energy = 0.859662                                |           |           |           | Thermal correction to Gibbs Free Energy = 0.862200                                 |           |           |           |
| C                                                                                 | 1.491115  | -4.335349 | -0.454462 | C                                                                                  | -1.448479 | 4.157827  | -0.814163 |
| C                                                                                 | 0.643043  | -3.125723 | -0.091743 | C                                                                                  | -0.577432 | 2.973756  | -0.435890 |
| C                                                                                 | -0.646680 | -3.085368 | -0.917637 | C                                                                                  | 0.646794  | 2.872554  | -1.339369 |
| C                                                                                 | -1.463187 | -4.355953 | -0.719459 | C                                                                                  | 1.498278  | 4.127778  | -1.244687 |
| C                                                                                 | -0.613900 | -5.588513 | -1.080842 | C                                                                                  | 0.638197  | 5.351587  | -1.619361 |
| C                                                                                 | 0.671680  | -5.623879 | -0.246180 | C                                                                                  | -0.602428 | 5.444847  | -0.720642 |
| H                                                                                 | 0.347131  | -3.214745 | 0.962802  | H                                                                                  | -0.218078 | 3.104394  | 0.593762  |
| H                                                                                 | 1.815210  | -4.272384 | -1.505574 | H                                                                                  | -1.835140 | 4.043999  | -1.839825 |
| H                                                                                 | 2.389155  | -4.380343 | 0.176793  | H                                                                                  | -2.303179 | 4.245645  | -0.129748 |
| H                                                                                 | -1.786041 | -4.421129 | 0.331046  | H                                                                                  | 1.873402  | 4.237738  | -0.215913 |
| H                                                                                 | -2.361955 | -4.349121 | -1.349925 | H                                                                                  | 2.359404  | 4.076027  | -1.924520 |
| H                                                                                 | -1.199498 | -6.500947 | -0.917018 | H                                                                                  | 1.240306  | 6.263298  | -1.529401 |
| H                                                                                 | -0.352682 | -5.547166 | -2.148139 | H                                                                                  | 0.322255  | 5.262800  | -2.668835 |
| H                                                                                 | 0.411509  | -5.714800 | 0.817846  | H                                                                                  | -0.285874 | 5.586045  | 0.321847  |
| H                                                                                 | 1.278815  | -6.495920 | -0.517078 | H                                                                                  | -1.213527 | 6.309205  | -1.006086 |
| H                                                                                 | -0.347966 | -3.025775 | -1.977747 | H                                                                                  | 0.291527  | 2.765824  | -2.377784 |
| N                                                                                 | 1.259632  | -1.809801 | -0.225421 | N                                                                                  | -1.194921 | 1.645135  | -0.474709 |
| N                                                                                 | -1.318029 | -1.830232 | -0.597614 | N                                                                                  | 1.294200  | 1.611550  | -0.972749 |
| C                                                                                 | -2.600096 | -1.688917 | -0.740570 | C                                                                                  | 2.587505  | 1.467695  | -0.970604 |
| H                                                                                 | -3.192365 | -2.575356 | -0.972490 | H                                                                                  | 3.175311  | 2.356349  | -1.189132 |
| C                                                                                 | 2.538977  | -1.678896 | -0.373450 | C                                                                                  | -2.484299 | 1.488265  | -0.581323 |
| H                                                                                 | 3.123659  | -2.593931 | -0.444166 | H                                                                                  | -3.064602 | 2.402746  | -0.668490 |
| C                                                                                 | -3.318343 | -0.459851 | -0.698674 | C                                                                                  | 3.310387  | 0.271510  | -0.761793 |
| C                                                                                 | -2.629057 | 0.761136  | -0.923161 | C                                                                                  | 2.629141  | -0.970908 | -0.820017 |
| C                                                                                 | -4.755365 | -0.496410 | -0.617118 | C                                                                                  | 4.746499  | 0.333277  | -0.633288 |
| C                                                                                 | -3.378064 | 1.976071  | -1.176815 | C                                                                                  | 3.385047  | -2.206202 | -0.846390 |
| C                                                                                 | -5.470513 | 0.702363  | -0.860540 | C                                                                                  | 5.466852  | -0.885539 | -0.662994 |
| C                                                                                 | -5.498262 | -1.641663 | -0.290240 | C                                                                                  | 5.481523  | 1.516006  | -0.464680 |
| C                                                                                 | -4.741964 | 1.894343  | -1.141950 | C                                                                                  | 4.746780  | -2.109436 | -0.777543 |
| C                                                                                 | -6.871268 | 0.709627  | -0.807530 | C                                                                                  | 6.865027  | -0.882654 | -0.562546 |
| C                                                                                 | -6.882023 | -1.612480 | -0.246911 | C                                                                                  | 6.863200  | 1.496536  | -0.368057 |
| H                                                                                 | -4.995533 | -2.567898 | -0.026026 | H                                                                                  | 4.978202  | 2.474196  | -0.368889 |
| H                                                                                 | -5.332700 | 2.787772  | -1.318808 | H                                                                                  | 5.342815  | -3.016501 | -0.787949 |
| C                                                                                 | -7.603234 | -0.431895 | -0.512645 | C                                                                                  | 7.590061  | 0.291705  | -0.422503 |
| H                                                                                 | -7.385532 | 1.649101  | -0.999952 | H                                                                                  | 7.381962  | -1.839675 | -0.589554 |
| H                                                                                 | -7.414506 | -2.518856 | 0.014054  | H                                                                                  | 7.388666  | 2.433677  | -0.232152 |
| C                                                                                 | 3.288448  | -0.465660 | -0.426862 | C                                                                                  | -3.220603 | 0.283428  | -0.543514 |
| C                                                                                 | 2.637752  | 0.781139  | -0.282070 | C                                                                                  | -2.549823 | -0.945416 | -0.315317 |
| C                                                                                 | 4.721169  | -0.533128 | -0.593893 | C                                                                                  | -4.661386 | 0.335965  | -0.661473 |
| C                                                                                 | 3.395418  | 2.012935  | -0.265840 | C                                                                                  | -3.310603 | -2.154231 | -0.075313 |
| C                                                                                 | 5.451363  | 0.684257  | -0.567566 | C                                                                                  | -5.385118 | -0.864731 | -0.453615 |
| C                                                                                 | 5.459487  | -1.714612 | -0.783280 | C                                                                                  | -5.403028 | 1.485392  | -0.973930 |
| C                                                                                 | 4.751763  | 1.911944  | -0.398792 | C                                                                                  | -4.671384 | -2.060384 | -0.150815 |
| C                                                                                 | 6.846678  | 0.679723  | -0.712800 | C                                                                                  | -6.784168 | -0.874593 | -0.540193 |
| C                                                                                 | 6.835925  | -1.694707 | -0.925607 | C                                                                                  | -6.785514 | 1.453638  | -1.055888 |
| H                                                                                 | 4.967877  | -2.681438 | -0.831754 | H                                                                                  | -4.911054 | 2.431922  | -1.178300 |
| H                                                                                 | 5.357930  | 2.812214  | -0.385343 | H                                                                                  | -5.273649 | -2.946179 | 0.025237  |
| C                                                                                 | 7.566521  | -0.490754 | -0.890289 | C                                                                                  | -7.512318 | 0.268596  | -0.834644 |
| H                                                                                 | 7.364478  | 1.636362  | -0.684025 | H                                                                                  | -7.299529 | -1.817240 | -0.367771 |
| H                                                                                 | 7.356866  | -2.633276 | -1.070162 | H                                                                                  | -7.312384 | 2.367551  | -1.301756 |
| O                                                                                 | 1.347257  | 0.856415  | -0.156265 | O                                                                                  | -1.257285 | -1.035473 | -0.302156 |
| O                                                                                 | -1.331582 | 0.801688  | -0.966657 | O                                                                                  | 1.334702  | -1.042932 | -0.903320 |
| Fe                                                                                | -0.140047 | -0.282612 | 0.098855  | Fe                                                                                 | 0.095089  | 0.248229  | -0.358938 |
| C                                                                                 | 2.690921  | 3.360769  | -0.121886 | C                                                                                  | -2.604873 | -3.464169 | 0.266204  |
| C                                                                                 | 3.693962  | 4.518073  | -0.103562 | C                                                                                  | -3.606925 | -4.593822 | 0.518579  |

|                      |            |           |           |                          |            |           |           |
|----------------------|------------|-----------|-----------|--------------------------|------------|-----------|-----------|
| H                    | 4.387136   | 4.448673  | 0.743218  | H                        | -4.275235  | -4.369566 | 1.358235  |
| H                    | 4.278026   | 4.572748  | -1.029796 | H                        | -4.216752  | -4.812255 | -0.366297 |
| H                    | 3.146398   | 5.461522  | -0.004619 | H                        | -3.056486  | -5.506248 | 0.771333  |
| C                    | 1.756259   | 3.574068  | -1.323147 | C                        | -1.705855  | -3.893086 | -0.904188 |
| H                    | 2.326995   | 3.578272  | -2.259395 | H                        | -2.302507  | -4.046938 | -1.811359 |
| H                    | 0.996757   | 2.793545  | -1.381026 | H                        | -0.938115  | -3.147998 | -1.112353 |
| H                    | 1.247287   | 4.541027  | -1.231281 | H                        | -1.208827  | -4.839795 | -0.661104 |
| C                    | 1.893970   | 3.420681  | 1.191888  | C                        | -1.777107  | -3.287539 | 1.550443  |
| H                    | 1.094691   | 2.680361  | 1.219385  | H                        | -1.016728  | -2.513090 | 1.448515  |
| H                    | 2.551684   | 3.252677  | 2.052342  | H                        | -2.425816  | -3.019739 | 2.392022  |
| H                    | 1.442267   | 4.414184  | 1.299390  | H                        | -1.274307  | -4.230546 | 1.796294  |
| C                    | -2.652323  | 3.292659  | -1.444481 | C                        | 2.673075   | -3.554784 | -0.918623 |
| C                    | -1.772272  | 3.162715  | -2.698636 | C                        | 1.840802   | -3.644510 | -2.208025 |
| H                    | -1.036326  | 2.364572  | -2.592439 | H                        | 1.095157   | -2.850021 | -2.260032 |
| H                    | -2.389946  | 2.953441  | -3.580254 | H                        | 2.489915   | -3.572539 | -3.088949 |
| H                    | -1.237995  | 4.104157  | -2.874903 | H                        | 1.321719   | -4.609586 | -2.247678 |
| C                    | -1.799512  | 3.667432  | -0.221369 | C                        | 1.779996   | -3.724243 | 0.320760  |
| H                    | -1.047919  | 2.909628  | -0.002678 | H                        | 1.024243   | -2.941651 | 0.383215  |
| H                    | -1.288085  | 4.620154  | -0.405497 | H                        | 1.271483   | -4.695114 | 0.281417  |
| H                    | -2.431768  | 3.784940  | 0.665894  | H                        | 2.382775   | -3.692028 | 1.235389  |
| C                    | -3.634995  | 4.440410  | -1.691493 | C                        | 3.667676   | -4.719279 | -0.933433 |
| H                    | -4.274566  | 4.629630  | -0.821418 | H                        | 4.277456   | -4.750995 | -0.023044 |
| H                    | -3.068509  | 5.357175  | -1.887822 | H                        | 3.110431   | -5.660757 | -0.987977 |
| H                    | -4.274806  | 4.254782  | -2.562441 | H                        | 4.336188   | -4.681589 | -1.801890 |
| O                    | -0.910870  | 0.849236  | 1.744110  | O                        | 0.712528   | 0.060331  | 1.561116  |
| S                    | -0.654650  | -0.140527 | 2.849806  | S                        | 0.593929   | 0.968125  | 2.768087  |
| O                    | -1.679587  | -0.279675 | 3.860959  | O                        | 1.533292   | 0.614734  | 3.816732  |
| O                    | -0.157204  | -1.370994 | 2.165428  | O                        | 0.451870   | 2.380747  | 2.406161  |
| C                    | 0.835422   | 0.535999  | 3.703947  | C                        | -1.065849  | 0.483456  | 3.401221  |
| F                    | 1.095324   | -0.192552 | 4.782109  | F                        | -1.368789  | 1.191511  | 4.484232  |
| F                    | 0.615051   | 1.793874  | 4.061684  | F                        | -1.091047  | -0.809701 | 3.707494  |
| F                    | 1.887083   | 0.492691  | 2.888945  | F                        | -2.002651  | 0.713281  | 2.471500  |
| C                    | 9.087009   | -0.442417 | -1.041288 | C                        | -9.037921  | 0.210448  | -0.908507 |
| C                    | 9.444616   | 0.410384  | -2.274050 | C                        | -9.455170  | -0.804452 | -1.990082 |
| C                    | 9.697986   | 0.191312  | 0.223563  | C                        | -9.588596  | -0.232441 | 0.460833  |
| C                    | 9.695318   | -1.840114 | -1.226048 | C                        | -9.651642  | 1.573463  | -1.259993 |
| H                    | 9.010428   | -0.031962 | -3.177930 | H                        | -9.062383  | -0.499233 | -2.966677 |
| H                    | 9.061343   | 1.431282  | -2.168830 | H                        | -9.071846  | -1.804271 | -1.758529 |
| H                    | 10.534764  | 0.458580  | -2.390012 | H                        | -10.549657 | -0.857569 | -2.047965 |
| H                    | 9.443083   | -0.406397 | 1.106103  | H                        | -9.293989  | 0.484484  | 1.235571  |
| H                    | 10.790218  | 0.236122  | 0.127559  | H                        | -10.683939 | -0.285116 | 0.422760  |
| H                    | 9.320413   | 1.208834  | 0.372941  | H                        | -9.202526  | -1.219871 | 0.737209  |
| H                    | 10.783014  | -1.745331 | -1.327301 | H                        | -10.742720 | 1.473531  | -1.300438 |
| H                    | 9.486558   | -2.479531 | -0.359803 | H                        | -9.405304  | 2.325204  | -0.500435 |
| H                    | 9.308168   | -2.322390 | -2.131755 | H                        | -9.303923  | 1.923720  | -2.239531 |
| C                    | -9.130190  | -0.372992 | -0.468016 | C                        | 9.114363   | 0.242947  | -0.315136 |
| C                    | -9.566177  | 0.649059  | 0.599522  | C                        | 9.505721   | -0.595148 | 0.917530  |
| C                    | -9.657088  | 0.060965  | -1.849456 | C                        | 9.687501   | -0.406937 | -1.589432 |
| C                    | -9.751344  | -1.733135 | -0.118228 | C                        | 9.729452   | 1.641824  | -0.165512 |
| H                    | -9.188285  | 0.350877  | 1.584041  | H                        | 9.095851   | -0.142435 | 1.827451  |
| H                    | -9.179250  | 1.647363  | 0.367571  | H                        | 9.120392   | -1.617457 | 0.835455  |
| H                    | -10.661622 | 0.701606  | 0.639402  | H                        | 10.598598  | -0.641732 | 1.004231  |
| H                    | -9.352179  | -0.662826 | -2.613908 | H                        | 9.410403   | 0.181982  | -2.471303 |
| H                    | -10.752794 | 0.116961  | -1.829384 | H                        | 10.781800  | -0.454230 | -1.523220 |
| H                    | -9.263708  | 1.045258  | -2.126662 | H                        | 9.303284   | -1.424931 | -1.716756 |
| H                    | -10.843246 | -1.633935 | -0.105287 | H                        | 10.819704  | 1.546371  | -0.098980 |
| H                    | -9.485241  | -2.492216 | -0.863759 | H                        | 9.492992   | 2.272347  | -1.031263 |
| H                    | -9.427323  | -2.072944 | 0.872906  | H                        | 9.373065   | 2.134041  | 0.747323  |
| <b>INT 1_doublet</b> |            |           |           | <b>[LFe]<sup>+</sup></b> |            |           |           |

|                                                                                                                                                                            |           |           |           |                                                                                                                                                                             |           |           |           |
|----------------------------------------------------------------------------------------------------------------------------------------------------------------------------|-----------|-----------|-----------|-----------------------------------------------------------------------------------------------------------------------------------------------------------------------------|-----------|-----------|-----------|
| 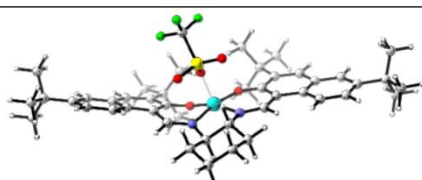 <p>E(UPBE1PBE) = -4193.071733<br/>Thermal correction to Gibbs Free Energy = 0.863424</p> |           |           |           |  <p>E(UPBE1PBE) = -3231.892635<br/>Thermal correction to Gibbs Free Energy = 0.840514</p> |           |           |           |
| C                                                                                                                                                                          | 1.665163  | -3.987607 | -1.527765 | C                                                                                                                                                                           | 1.440021  | 4.150300  | -0.371226 |
| C                                                                                                                                                                          | 0.802466  | -2.870070 | -0.967045 | C                                                                                                                                                                           | 0.576963  | 2.895156  | -0.520544 |
| C                                                                                                                                                                          | -0.447684 | -2.669628 | -1.825940 | C                                                                                                                                                                           | -0.577047 | 2.895136  | 0.520900  |
| C                                                                                                                                                                          | -1.296358 | -3.928498 | -1.846391 | C                                                                                                                                                                           | -1.440103 | 4.150286  | 0.371648  |
| C                                                                                                                                                                          | -0.450453 | -5.095753 | -2.393967 | C                                                                                                                                                                           | -0.562738 | 5.404534  | 0.520587  |
| C                                                                                                                                                                          | 0.829698  | -5.284358 | -1.566805 | C                                                                                                                                                                           | 0.562671  | 5.404568  | -0.520054 |
| H                                                                                                                                                                          | 0.476338  | -3.164297 | 0.039939  | H                                                                                                                                                                           | 0.106008  | 2.899965  | -1.517321 |
| H                                                                                                                                                                          | 2.011099  | -3.731253 | -2.541144 | H                                                                                                                                                                           | 1.917838  | 4.149843  | 0.619275  |
| H                                                                                                                                                                          | 2.546341  | -4.162114 | -0.896889 | H                                                                                                                                                                           | 2.224935  | 4.168129  | -1.137805 |
| H                                                                                                                                                                          | -1.637185 | -4.151886 | -0.824661 | H                                                                                                                                                                           | -1.917893 | 4.149922  | -0.618866 |
| H                                                                                                                                                                          | -2.179516 | -3.797593 | -2.486025 | H                                                                                                                                                                           | -2.225034 | 4.168055  | 1.138213  |
| H                                                                                                                                                                          | -1.044777 | -6.016972 | -2.383595 | H                                                                                                                                                                           | -1.184808 | 6.299369  | 0.406902  |
| H                                                                                                                                                                          | -0.179942 | -4.885235 | -3.438812 | H                                                                                                                                                                           | -0.128994 | 5.427448  | 1.530074  |
| H                                                                                                                                                                          | 0.557609  | -5.559521 | -0.538358 | H                                                                                                                                                                           | 0.128921  | 5.427571  | -1.529536 |
| H                                                                                                                                                                          | 1.433575  | -6.099155 | -1.983328 | H                                                                                                                                                                           | 1.184748  | 6.299389  | -0.406298 |
| H                                                                                                                                                                          | -0.108275 | -2.456819 | -2.853246 | H                                                                                                                                                                           | -0.106067 | 2.899926  | 1.517669  |
| N                                                                                                                                                                          | 1.416508  | -1.536870 | -0.831041 | N                                                                                                                                                                           | 1.260812  | 1.603726  | -0.356964 |
| N                                                                                                                                                                          | -1.086101 | -1.448770 | -1.326993 | N                                                                                                                                                                           | -1.260872 | 1.603692  | 0.357316  |
| C                                                                                                                                                                          | -2.372952 | -1.327043 | -1.206809 | C                                                                                                                                                                           | -2.564104 | 1.520134  | 0.314572  |
| H                                                                                                                                                                          | -2.986457 | -2.192000 | -1.447871 | H                                                                                                                                                                           | -3.112753 | 2.448808  | 0.446952  |
| C                                                                                                                                                                          | 2.706677  | -1.410401 | -0.657895 | C                                                                                                                                                                           | 2.564041  | 1.520129  | -0.314467 |
| H                                                                                                                                                                          | 3.282786  | -2.328005 | -0.718898 | H                                                                                                                                                                           | 3.112702  | 2.448777  | -0.446996 |
| C                                                                                                                                                                          | -3.060946 | -0.133744 | -0.858633 | C                                                                                                                                                                           | -3.363629 | 0.364345  | 0.095321  |
| C                                                                                                                                                                          | -2.400254 | 1.118278  | -0.952778 | C                                                                                                                                                                           | -2.773663 | -0.894106 | -0.203345 |
| C                                                                                                                                                                          | -4.470160 | -0.209589 | -0.578421 | C                                                                                                                                                                           | -4.802547 | 0.495373  | 0.141213  |
| C                                                                                                                                                                          | -3.178801 | 2.341922  | -0.937853 | C                                                                                                                                                                           | -3.567953 | -2.053079 | -0.491938 |
| C                                                                                                                                                                          | -5.213108 | 0.995715  | -0.551206 | C                                                                                                                                                                           | -5.579978 | -0.657530 | -0.152719 |
| C                                                                                                                                                                          | -5.152677 | -1.405256 | -0.305809 | C                                                                                                                                                                           | -5.497585 | 1.673348  | 0.460340  |
| C                                                                                                                                                                          | -4.528791 | 2.228789  | -0.753665 | C                                                                                                                                                                           | -4.927915 | -1.883192 | -0.459386 |
| C                                                                                                                                                                          | -6.593766 | 0.964761  | -0.310396 | C                                                                                                                                                                           | -6.981082 | -0.593143 | -0.134213 |
| C                                                                                                                                                                          | -6.517352 | -1.412321 | -0.071389 | C                                                                                                                                                                           | -6.880594 | 1.712756  | 0.470732  |
| H                                                                                                                                                                          | -4.606555 | -2.340565 | -0.220525 | H                                                                                                                                                                           | -4.973084 | 2.587468  | 0.721125  |
| H                                                                                                                                                                          | -5.138703 | 3.126273  | -0.729207 | H                                                                                                                                                                           | -5.572506 | -2.729475 | -0.673495 |
| C                                                                                                                                                                          | -7.273355 | -0.223068 | -0.080392 | C                                                                                                                                                                           | -7.659669 | 0.576715  | 0.169897  |
| H                                                                                                                                                                          | -7.133255 | 1.909736  | -0.298473 | H                                                                                                                                                                           | -7.537860 | -1.498009 | -0.365230 |
| H                                                                                                                                                                          | -7.004848 | -2.355481 | 0.142764  | H                                                                                                                                                                           | -7.373067 | 2.643674  | 0.722753  |
| C                                                                                                                                                                          | 3.440092  | -0.228374 | -0.404211 | C                                                                                                                                                                           | 3.363605  | 0.364345  | -0.095284 |
| C                                                                                                                                                                          | 2.777829  | 1.028113  | -0.295954 | C                                                                                                                                                                           | 2.773675  | -0.894109 | 0.203485  |
| C                                                                                                                                                                          | 4.879964  | -0.319200 | -0.266023 | C                                                                                                                                                                           | 4.802510  | 0.495383  | -0.141336 |
| C                                                                                                                                                                          | 3.539603  | 2.234951  | -0.032033 | C                                                                                                                                                                           | 3.568010  | -2.053044 | 0.492068  |
| C                                                                                                                                                                          | 5.602181  | 0.878042  | -0.032155 | C                                                                                                                                                                           | 5.579987  | -0.657484 | 0.152641  |
| C                                                                                                                                                                          | 5.624530  | -1.506583 | -0.346917 | C                                                                                                                                                                           | 5.497518  | 1.673333  | -0.460652 |
| C                                                                                                                                                                          | 4.893266  | 2.110530  | 0.077699  | C                                                                                                                                                                           | 4.927967  | -1.883128 | 0.459446  |
| C                                                                                                                                                                          | 6.996853  | 0.853050  | 0.103149  | C                                                                                                                                                                           | 6.981089  | -0.593079 | 0.134016  |
| C                                                                                                                                                                          | 7.002695  | -1.509965 | -0.208856 | C                                                                                                                                                                           | 6.880522  | 1.712755  | -0.471162 |
| H                                                                                                                                                                          | 5.140611  | -2.464056 | -0.513891 | H                                                                                                                                                                           | 4.972980  | 2.587413  | -0.721499 |
| H                                                                                                                                                                          | 5.495164  | 2.992461  | 0.273439  | H                                                                                                                                                                           | 5.572581  | -2.729386 | 0.673590  |
| C                                                                                                                                                                          | 7.725367  | -0.324319 | 0.019528  | C                                                                                                                                                                           | 7.659635  | 0.576752  | -0.170275 |
| H                                                                                                                                                                          | 7.507941  | 1.796703  | 0.283105  | H                                                                                                                                                                           | 7.537898  | -1.497912 | 0.365088  |
| H                                                                                                                                                                          | 7.529013  | -2.454271 | -0.276468 | H                                                                                                                                                                           | 7.372967  | 2.643653  | -0.723317 |
| O                                                                                                                                                                          | 1.497378  | 1.151825  | -0.434540 | O                                                                                                                                                                           | 1.471481  | -1.019743 | 0.220425  |
| O                                                                                                                                                                          | -1.110313 | 1.207984  | -1.112110 | O                                                                                                                                                                           | -1.471463 | -1.019740 | -0.220193 |
| Fe                                                                                                                                                                         | 0.145557  | -0.133431 | -0.691640 | Fe                                                                                                                                                                          | 0.000002  | 0.066522  | 0.000263  |
| C                                                                                                                                                                          | 2.830252  | 3.575240  | 0.147790  | C                                                                                                                                                                           | 2.917335  | -3.399727 | 0.813504  |
| C                                                                                                                                                                          | 3.825300  | 4.708867  | 0.410908  | C                                                                                                                                                                           | 3.973853  | -4.473707 | 1.088142  |
| H                                                                                                                                                                          | 4.404216  | 4.545282  | 1.327357  | H                                                                                                                                                                           | 4.620685  | -4.647379 | 0.220546  |

|                                                                                                                                     |            |           |           |                                                                                               |            |           |           |
|-------------------------------------------------------------------------------------------------------------------------------------|------------|-----------|-----------|-----------------------------------------------------------------------------------------------|------------|-----------|-----------|
| H                                                                                                                                   | 4.523054   | 4.847086  | -0.423748 | H                                                                                             | 4.602502   | -4.222198 | 1.950059  |
| H                                                                                                                                   | 3.271369   | 5.645456  | 0.535984  | H                                                                                             | 3.471120   | -5.419078 | 1.315166  |
| C                                                                                                                                   | 2.041940   | 3.941544  | -1.120726 | C                                                                                             | 2.042186   | -3.280985 | 2.072797  |
| H                                                                                                                                   | 2.716820   | 4.020406  | -1.981567 | H                                                                                             | 2.637652   | -2.951756 | 2.931785  |
| H                                                                                                                                   | 1.272475   | 3.202876  | -1.345167 | H                                                                                             | 1.217450   | -2.579361 | 1.932204  |
| H                                                                                                                                   | 1.555463   | 4.914721  | -0.983275 | H                                                                                             | 1.614523   | -4.260337 | 2.315703  |
| C                                                                                                                                   | 1.895301   | 3.490633  | 1.366686  | C                                                                                             | 2.069238   | -3.875545 | -0.378592 |
| H                                                                                                                                   | 1.160907   | 2.690892  | 1.261189  | H                                                                                             | 1.251178   | -3.186984 | -0.599679 |
| H                                                                                                                                   | 2.475388   | 3.308363  | 2.278829  | H                                                                                             | 2.687309   | -3.983284 | -1.276984 |
| H                                                                                                                                   | 1.357897   | 4.438499  | 1.489723  | H                                                                                             | 1.634407   | -4.855331 | -0.149972 |
| C                                                                                                                                   | -2.498066  | 3.700711  | -1.091767 | C                                                                                             | -2.917225  | -3.399755 | -0.813318 |
| C                                                                                                                                   | -1.744865  | 3.772048  | -2.430095 | C                                                                                             | -2.069219  | -3.875570 | 0.378842  |
| H                                                                                                                                   | -0.976316  | 3.000806  | -2.497297 | H                                                                                             | -1.251211  | -3.186972 | 0.600004  |
| H                                                                                                                                   | -2.439289  | 3.648600  | -3.269679 | H                                                                                             | -2.687365  | -3.983348 | 1.277178  |
| H                                                                                                                                   | -1.262515  | 4.751889  | -2.530610 | H                                                                                             | -1.634335  | -4.855336 | 0.150245  |
| C                                                                                                                                   | -1.527868  | 3.916918  | 0.079368  | C                                                                                             | -2.041954  | -3.280975 | -2.072532 |
| H                                                                                                                                   | -0.760360  | 3.143908  | 0.105225  | H                                                                                             | -1.217218  | -2.579378 | -1.931830 |
| H                                                                                                                                   | -1.034738  | 4.891726  | -0.020067 | H                                                                                             | -1.614291  | -4.260329 | -2.315436 |
| H                                                                                                                                   | -2.067003  | 3.903560  | 1.033748  | H                                                                                             | -2.637336  | -2.951703 | -2.931560 |
| C                                                                                                                                   | -3.511905  | 4.848263  | -1.073957 | C                                                                                             | -3.973684  | -4.473757 | -1.088090 |
| H                                                                                                                                   | -4.060138  | 4.898614  | -0.125989 | H                                                                                             | -4.602266  | -4.222226 | -1.950047 |
| H                                                                                                                                   | -2.977062  | 5.796730  | -1.194045 | H                                                                                             | -3.470896  | -5.419099 | -1.315115 |
| H                                                                                                                                   | -4.236981  | 4.771725  | -1.893014 | H                                                                                             | -4.620578  | -4.647496 | -0.220555 |
| O                                                                                                                                   | -0.481254  | -0.294438 | 1.116276  | C                                                                                             | 9.186423   | 0.600744  | -0.178059 |
| S                                                                                                                                   | -0.667153  | -1.573594 | 1.950433  | C                                                                                             | 9.699392   | 0.222549  | 1.225441  |
| O                                                                                                                                   | -1.721446  | -2.454046 | 1.452256  | C                                                                                             | 9.698708   | -0.420121 | -1.213228 |
| O                                                                                                                                   | 0.600876   | -2.185800 | 2.329769  | C                                                                                             | 9.741485   | 1.985049  | -0.542730 |
| C                                                                                                                                   | -1.350012  | -0.750258 | 3.450692  | H                                                                                             | 9.340472   | 0.942674  | 1.969446  |
| F                                                                                                                                   | -1.607269  | -1.679596 | 4.365582  | H                                                                                             | 9.359441   | -0.778171 | 1.514660  |
| F                                                                                                                                   | -2.473525  | -0.112986 | 3.148148  | H                                                                                             | 10.795899  | 0.228140  | 1.229311  |
| F                                                                                                                                   | -0.471965  | 0.114343  | 3.941551  | H                                                                                             | 9.337320   | -0.161481 | -2.214955 |
| C                                                                                                                                   | 9.245474   | -0.301061 | 0.176999  | H                                                                                             | 10.795253  | -0.415603 | -1.221392 |
| C                                                                                                                                   | 9.851826   | 0.578332  | -0.933652 | H                                                                                             | 9.360952   | -1.433782 | -0.970516 |
| C                                                                                                                                   | 9.600255   | 0.284886  | 1.557286  | H                                                                                             | 10.836372  | 1.941857  | -0.530205 |
| C                                                                                                                                   | 9.859350   | -1.704634 | 0.075290  | H                                                                                             | 9.426932   | 2.288675  | -1.548700 |
| H                                                                                                                                   | 9.607067   | 0.164465  | -1.918597 | H                                                                                             | 9.424520   | 2.744695  | 0.182167  |
| H                                                                                                                                   | 9.461329   | 1.600594  | -0.880353 | C                                                                                             | -9.186464  | 0.600692  | 0.177512  |
| H                                                                                                                                   | 10.943115  | 0.616589  | -0.825279 | C                                                                                             | -9.699226  | 0.222734  | -1.226127 |
| H                                                                                                                                   | 9.167229   | -0.333195 | 2.351972  | C                                                                                             | -9.698891  | -0.420357 | 1.212423  |
| H                                                                                                                                   | 10.690153  | 0.312128  | 1.681766  | C                                                                                             | -9.741602  | 1.984922  | 0.542352  |
| H                                                                                                                                   | 9.214181   | 1.304706  | 1.662056  | H                                                                                             | -9.340233  | 0.943011  | -1.969950 |
| H                                                                                                                                   | 10.946024  | -1.627474 | 0.198166  | H                                                                                             | -9.359171  | -0.777916 | -1.515467 |
| H                                                                                                                                   | 9.471425   | -2.362656 | 0.862166  | H                                                                                             | -10.795733 | 0.228269  | -1.230155 |
| H                                                                                                                                   | 9.656750   | -2.154884 | -0.903990 | H                                                                                             | -9.337656  | -0.161892 | 2.214251  |
| C                                                                                                                                   | -8.780457  | -0.204067 | 0.176081  | H                                                                                             | -10.795437 | -0.415847 | 1.220421  |
| C                                                                                                                                   | -9.068195  | 0.641102  | 1.432083  | H                                                                                             | -9.361101  | -1.433976 | 0.969585  |
| C                                                                                                                                   | -9.490324  | 0.417114  | -1.042444 | H                                                                                             | -10.836488 | 1.941683  | 0.529780  |
| C                                                                                                                                   | -9.347553  | -1.613264 | 0.400608  | H                                                                                             | -9.427093  | 2.288422  | 1.548374  |
| H                                                                                                                                   | -8.560584  | 0.208533  | 2.301723  | H                                                                                             | -9.424655  | 2.744688  | -0.182427 |
| H                                                                                                                                   | -8.715842  | 1.670101  | 1.301290  |                                                                                               |            |           |           |
| H                                                                                                                                   | -10.148184 | 0.664970  | 1.625538  |                                                                                               |            |           |           |
| H                                                                                                                                   | -9.290772  | -0.179231 | -1.940132 |                                                                                               |            |           |           |
| H                                                                                                                                   | -10.573371 | 0.445807  | -0.868102 |                                                                                               |            |           |           |
| H                                                                                                                                   | -9.140111  | 1.439955  | -1.220260 |                                                                                               |            |           |           |
| H                                                                                                                                   | -10.428953 | -1.540163 | 0.566760  |                                                                                               |            |           |           |
| H                                                                                                                                   | -9.177023  | -2.251245 | -0.474975 |                                                                                               |            |           |           |
| H                                                                                                                                   | -8.897657  | -2.084450 | 1.282714  |                                                                                               |            |           |           |
| <br>CF <sub>3</sub> SO <sub>3</sub> <sup>-</sup> |            |           |           | <br>HOTf |            |           |           |
| E(RPBE1PBE) = -961.029680                                                                                                           |            |           |           | E(RPBE1PBE) = -961.515266                                                                     |            |           |           |
| Thermal correction to Gibbs Free Energy= -0.004339                                                                                  |            |           |           | Thermal correction to Gibbs Free Energy= 0.005909                                             |            |           |           |



|                                                                                                                                                                                                              |           |           |           |                                                                                                                                                                                            |           |           |           |
|--------------------------------------------------------------------------------------------------------------------------------------------------------------------------------------------------------------|-----------|-----------|-----------|--------------------------------------------------------------------------------------------------------------------------------------------------------------------------------------------|-----------|-----------|-----------|
| O                                                                                                                                                                                                            | 1.231635  | 1.275776  | 0.662784  | O                                                                                                                                                                                          | -1.793755 | -0.316390 | 0.000000  |
| S                                                                                                                                                                                                            | 0.915153  | -0.000035 | 0.000048  | S                                                                                                                                                                                          | -0.254647 | -0.819295 | 0.000000  |
| O                                                                                                                                                                                                            | 1.232049  | -0.063989 | -1.436060 | O                                                                                                                                                                                          | 0.062639  | -1.450594 | 1.261810  |
| O                                                                                                                                                                                                            | 1.231439  | -1.211954 | 0.773561  | O                                                                                                                                                                                          | 0.062639  | -1.450594 | -1.261810 |
| C                                                                                                                                                                                                            | -0.931199 | 0.000036  | -0.000002 | C                                                                                                                                                                                          | 0.453991  | 0.891847  | 0.000000  |
| F                                                                                                                                                                                                            | -1.430342 | -1.105729 | -0.576459 | F                                                                                                                                                                                          | 1.771842  | 0.766368  | 0.000000  |
| F                                                                                                                                                                                                            | -1.430016 | 1.052090  | -0.669524 | F                                                                                                                                                                                          | 0.062639  | 1.538824  | 1.082810  |
| F                                                                                                                                                                                                            | -1.430336 | 0.053827  | 1.245645  | F                                                                                                                                                                                          | 0.062639  | 1.538824  | -1.082810 |
| <br><b>CF<sub>3</sub>CO<sup>-</sup></b><br>E(RPBE1PBE) = -525.919727<br>Thermal correction to Gibbs Free Energy = -0.005146 |           |           |           | <br><b>TFA</b><br>E(RPBE1PBE) = -526.444680<br>Thermal correction to Gibbs Free Energy = 0.008361       |           |           |           |
| C                                                                                                                                                                                                            | 0.511848  | 0.013900  | 0.000001  | C                                                                                                                                                                                          | 0.599429  | -0.000422 | 0.000000  |
| C                                                                                                                                                                                                            | -1.057666 | 0.009534  | -0.000008 | C                                                                                                                                                                                          | -0.930413 | 0.156648  | -0.000028 |
| O                                                                                                                                                                                                            | -1.582998 | 1.134970  | 0.000015  | O                                                                                                                                                                                          | -1.492549 | 1.215673  | -0.000025 |
| O                                                                                                                                                                                                            | -1.520699 | -1.144954 | -0.000033 | O                                                                                                                                                                                          | -1.511028 | -1.042838 | 0.000012  |
| F                                                                                                                                                                                                            | 1.025288  | -0.625337 | 1.081966  | H                                                                                                                                                                                          | -2.472470 | -0.892121 | 0.000021  |
| F                                                                                                                                                                                                            | 1.072124  | 1.244046  | -0.000064 | F                                                                                                                                                                                          | 0.992941  | -0.674861 | 1.083700  |
| F                                                                                                                                                                                                            | 1.025307  | -0.625457 | -1.081882 | F                                                                                                                                                                                          | 1.179304  | 1.191141  | -0.000032 |
| <br><b>1f enol</b><br>E(RPBE1PBE) = -768.186448<br>Thermal correction to Gibbs Free Energy = 0.233515                       |           |           |           | <br><b>1f enolate</b><br>E(RPBE1PBE) = -767.627207<br>Thermal correction to Gibbs Free Energy = 0.218350 |           |           |           |
| C                                                                                                                                                                                                            | -2.438644 | 0.458144  | 0.000263  | C                                                                                                                                                                                          | -2.454254 | 0.479593  | -0.000008 |
| C                                                                                                                                                                                                            | -2.253665 | -0.934814 | 0.000078  | C                                                                                                                                                                                          | -2.140224 | -0.880143 | -0.000205 |
| C                                                                                                                                                                                                            | -3.356688 | -1.774949 | -0.000090 | C                                                                                                                                                                                          | -3.154979 | -1.829235 | -0.000204 |
| C                                                                                                                                                                                                            | -4.632390 | -1.208365 | -0.000110 | C                                                                                                                                                                                          | -4.485126 | -1.400233 | 0.000047  |
| C                                                                                                                                                                                                            | -4.806870 | 0.178027  | 0.000004  | C                                                                                                                                                                                          | -4.792900 | -0.036682 | 0.000303  |
| C                                                                                                                                                                                                            | -3.707036 | 1.030021  | 0.000194  | C                                                                                                                                                                                          | -3.773610 | 0.913919  | 0.000278  |
| C                                                                                                                                                                                                            | -0.150670 | 0.103481  | -0.000072 | C                                                                                                                                                                                          | -0.130810 | 0.367793  | -0.000354 |
| C                                                                                                                                                                                                            | -0.781240 | -1.258835 | -0.000055 | C                                                                                                                                                                                          | -0.644430 | -1.050138 | -0.000229 |
| H                                                                                                                                                                                                            | -3.235518 | -2.855280 | -0.000161 | H                                                                                                                                                                                          | -2.922859 | -2.893840 | -0.000416 |
| H                                                                                                                                                                                                            | -5.504912 | -1.856038 | -0.000351 | H                                                                                                                                                                                          | -5.289197 | -2.134139 | 0.000004  |
| H                                                                                                                                                                                                            | -5.811191 | 0.592016  | -0.000108 | H                                                                                                                                                                                          | -5.835405 | 0.277893  | 0.000537  |
| H                                                                                                                                                                                                            | -3.826049 | 2.109289  | 0.000270  | H                                                                                                                                                                                          | -3.975240 | 1.982898  | 0.000436  |
| H                                                                                                                                                                                                            | -0.496589 | -1.852275 | -0.879387 | H                                                                                                                                                                                          | -0.315316 | -1.633867 | -0.875535 |
| H                                                                                                                                                                                                            | -0.496309 | -1.852148 | 0.879283  | H                                                                                                                                                                                          | -0.315661 | -1.633410 | 0.875568  |
| C                                                                                                                                                                                                            | -1.120737 | 1.074040  | 0.000156  | C                                                                                                                                                                                          | -1.201965 | 1.314875  | -0.000127 |
| O                                                                                                                                                                                                            | -0.937022 | 2.382136  | 0.000041  | O                                                                                                                                                                                          | -1.233817 | 2.553041  | 0.000047  |
| C                                                                                                                                                                                                            | 1.237516  | 0.472719  | -0.000268 | C                                                                                                                                                                                          | 1.248745  | 0.682614  | -0.000381 |
| O                                                                                                                                                                                                            | 1.603763  | 1.655327  | -0.000361 | O                                                                                                                                                                                          | 1.801922  | 1.778498  | -0.000258 |
| O                                                                                                                                                                                                            | 2.065252  | -0.575052 | -0.000359 | O                                                                                                                                                                                          | 2.002375  | -0.504426 | -0.000578 |
| C                                                                                                                                                                                                            | 3.513615  | -0.405173 | 0.000060  | C                                                                                                                                                                                          | 3.426662  | -0.451197 | 0.000140  |
| C                                                                                                                                                                                                            | 3.956452  | 0.318082  | -1.265428 | C                                                                                                                                                                                          | 3.953763  | 0.233051  | -1.261528 |
| C                                                                                                                                                                                                            | 3.955955  | 0.319187  | 1.265093  | C                                                                                                                                                                                          | 3.952513  | 0.232272  | 1.262745  |
| C                                                                                                                                                                                                            | 4.016033  | -1.841818 | 0.000855  | C                                                                                                                                                                                          | 3.834638  | -1.922172 | -0.000130 |
| H                                                                                                                                                                                                            | 3.577214  | -0.202800 | -2.150894 | H                                                                                                                                                                                          | 3.545805  | -0.264906 | -2.148715 |
| H                                                                                                                                                                                                            | 3.595560  | 1.347582  | -1.276922 | H                                                                                                                                                                                          | 3.641291  | 1.278081  | -1.271142 |
| H                                                                                                                                                                                                            | 5.050452  | 0.325941  | -1.316703 | H                                                                                                                                                                                          | 5.049056  | 0.171098  | -1.301881 |
| H                                                                                                                                                                                                            | 3.574291  | -0.199614 | 2.150745  | H                                                                                                                                                                                          | 3.544564  | -0.266831 | 2.149300  |
| H                                                                                                                                                                                                            | 5.049894  | 0.324738  | 1.318029  | H                                                                                                                                                                                          | 5.047834  | 0.171229  | 1.303591  |
| H                                                                                                                                                                                                            | 3.597185  | 1.349444  | 1.274642  | H                                                                                                                                                                                          | 3.639206  | 1.277047  | 1.273069  |
| H                                                                                                                                                                                                            | 5.110374  | -1.857252 | 0.000269  | H                                                                                                                                                                                          | 4.926629  | -2.023661 | 0.000747  |
| H                                                                                                                                                                                                            | 3.660039  | -2.372846 | 0.889232  | H                                                                                                                                                                                          | 3.432896  | -2.425538 | 0.885912  |
| H                                                                                                                                                                                                            | 3.659084  | -2.374047 | -0.886411 | H                                                                                                                                                                                          | 3.434401  | -2.424856 | -0.887244 |
| H                                                                                                                                                                                                            | 0.050748  | 2.495531  | -0.000197 |                                                                                                                                                                                            |           |           |           |
| <b>t-BuOH</b>                                                                                                                                                                                                |           |           |           | <b>2c-2</b>                                                                                                                                                                                |           |           |           |

|                                                                                                                                                                                                                   |           |           |           |                                                                                                                                                                                          |           |           |           |
|-------------------------------------------------------------------------------------------------------------------------------------------------------------------------------------------------------------------|-----------|-----------|-----------|------------------------------------------------------------------------------------------------------------------------------------------------------------------------------------------|-----------|-----------|-----------|
|  <p>E(RPBE1PBE) = -233.474250<br/>Thermal correction to Gibbs Free Energy = 0.108271</p>                                         |           |           |           |  <p>E(UPBE1PBE) = -667.895606<br/>Thermal correction to Gibbs Free Energy = 0.172920</p>               |           |           |           |
| O                                                                                                                                                                                                                 | -0.018537 | -0.000766 | 1.444059  | C                                                                                                                                                                                        | -1.939671 | -0.533785 | 0.000194  |
| H                                                                                                                                                                                                                 | -0.947913 | 0.011229  | 1.711797  | H                                                                                                                                                                                        | -1.733822 | -1.597116 | 0.000564  |
| C                                                                                                                                                                                                                 | 0.005327  | -0.000203 | 0.017886  | N                                                                                                                                                                                        | -0.999274 | 0.354396  | -0.000078 |
| C                                                                                                                                                                                                                 | -0.700156 | -1.247682 | -0.510073 | C                                                                                                                                                                                        | 0.384155  | 0.256602  | -0.000105 |
| C                                                                                                                                                                                                                 | -0.667594 | 1.265711  | -0.508702 | C                                                                                                                                                                                        | 1.051433  | -0.976907 | -0.000283 |
| C                                                                                                                                                                                                                 | 1.481312  | -0.018575 | -0.351278 | C                                                                                                                                                                                        | 1.111836  | 1.461519  | 0.000043  |
| H                                                                                                                                                                                                                 | -0.234118 | -2.147321 | -0.095961 | C                                                                                                                                                                                        | 2.428903  | -1.009714 | -0.000200 |
| H                                                                                                                                                                                                                 | -1.759305 | -1.246234 | -0.221360 | H                                                                                                                                                                                        | 0.502267  | -1.913283 | -0.000577 |
| H                                                                                                                                                                                                                 | -0.654880 | -1.301826 | -1.603385 | C                                                                                                                                                                                        | 2.483895  | 1.431984  | 0.000142  |
| H                                                                                                                                                                                                                 | -0.177471 | 2.152476  | -0.094601 | H                                                                                                                                                                                        | 0.589518  | 2.415302  | 0.000133  |
| H                                                                                                                                                                                                                 | -0.622196 | 1.319429  | -1.602108 | C                                                                                                                                                                                        | 3.162758  | 0.196396  | 0.000074  |
| H                                                                                                                                                                                                                 | -1.726032 | 1.292225  | -0.218705 | H                                                                                                                                                                                        | 2.937455  | -1.966166 | -0.000417 |
| H                                                                                                                                                                                                                 | 1.611645  | -0.018408 | -1.438076 | H                                                                                                                                                                                        | 3.070058  | 2.344208  | 0.000285  |
| H                                                                                                                                                                                                                 | 1.983806  | 0.861077  | 0.063027  | O                                                                                                                                                                                        | 4.482895  | 0.268383  | 0.000227  |
| H                                                                                                                                                                                                                 | 1.961425  | -0.912024 | 0.059904  | C                                                                                                                                                                                        | 5.258196  | -0.927712 | -0.000004 |
|                                                                                                                                                                                                                   |           |           |           | H                                                                                                                                                                                        | 5.058296  | -1.518340 | -0.899793 |
|                                                                                                                                                                                                                   |           |           |           | H                                                                                                                                                                                        | 6.296176  | -0.599258 | 0.000206  |
|                                                                                                                                                                                                                   |           |           |           | H                                                                                                                                                                                        | 5.058125  | -1.518791 | 0.899453  |
|                                                                                                                                                                                                                   |           |           |           | C                                                                                                                                                                                        | -3.315414 | 0.036109  | 0.000007  |
|                                                                                                                                                                                                                   |           |           |           | O                                                                                                                                                                                        | -3.481398 | 1.236958  | -0.000355 |
|                                                                                                                                                                                                                   |           |           |           | O                                                                                                                                                                                        | -4.226361 | -0.908130 | 0.000256  |
|                                                                                                                                                                                                                   |           |           |           | C                                                                                                                                                                                        | -5.596704 | -0.456579 | 0.000100  |
|                                                                                                                                                                                                                   |           |           |           | H                                                                                                                                                                                        | -6.196398 | -1.363952 | 0.000444  |
|                                                                                                                                                                                                                   |           |           |           | H                                                                                                                                                                                        | -5.785748 | 0.141725  | 0.893388  |
|                                                                                                                                                                                                                   |           |           |           | H                                                                                                                                                                                        | -5.785761 | 0.141038  | -0.893647 |
|                                                                                                                                                                                                                   |           |           |           | H                                                                                                                                                                                        | -1.392652 | 1.308689  | -0.000324 |
|  <p>[LFe(<i>t</i>-BuOH)]<sup>+</sup><br/>E(UPBE1PBE) = -3465.422068<br/>Thermal correction to Gibbs Free Energy = 0.971785</p> |           |           |           |  <p>IINT 2<br/>E(UPBE1PBE) = -3999.744730<br/>Thermal correction to Gibbs Free Energy = 1.087452</p> |           |           |           |
| C                                                                                                                                                                                                                 | -1.458157 | 4.240892  | 0.173311  | C                                                                                                                                                                                        | 1.696103  | -0.892449 | 4.474278  |
| C                                                                                                                                                                                                                 | -0.602150 | 2.995011  | 0.407050  | C                                                                                                                                                                                        | 0.898178  | -0.354458 | 3.286531  |
| C                                                                                                                                                                                                                 | 0.585757  | 2.940605  | -0.583949 | C                                                                                                                                                                                        | -0.360151 | -1.231718 | 3.060033  |
| C                                                                                                                                                                                                                 | 1.443270  | 4.206055  | -0.464326 | C                                                                                                                                                                                        | -1.258858 | -1.129835 | 4.300944  |
| C                                                                                                                                                                                                                 | 0.575336  | 5.458026  | -0.677856 | C                                                                                                                                                                                        | -0.487000 | -1.607713 | 5.542180  |
| C                                                                                                                                                                                                                 | -0.585149 | 5.496681  | 0.322155  | C                                                                                                                                                                                        | 0.812385  | -0.807477 | 5.731608  |
| H                                                                                                                                                                                                                 | -0.170153 | 3.046260  | 1.421154  | H                                                                                                                                                                                        | 0.542589  | 0.655718  | 3.526129  |
| H                                                                                                                                                                                                                 | -1.883932 | 4.211613  | -0.840206 | H                                                                                                                                                                                        | 1.983355  | -1.938725 | 4.295256  |
| H                                                                                                                                                                                                                 | -2.282967 | 4.275249  | 0.896895  | H                                                                                                                                                                                        | 2.610016  | -0.300672 | 4.615324  |
| H                                                                                                                                                                                                                 | 1.900847  | 4.234300  | 0.535314  | H                                                                                                                                                                                        | -1.564050 | -0.081629 | 4.419899  |
| H                                                                                                                                                                                                                 | 2.244906  | 4.202722  | -1.212603 | H                                                                                                                                                                                        | -2.165694 | -1.732963 | 4.170277  |
| H                                                                                                                                                                                                                 | 1.198483  | 6.353416  | -0.572939 | H                                                                                                                                                                                        | -1.120162 | -1.514399 | 6.432931  |
| H                                                                                                                                                                                                                 | 0.174371  | 5.451345  | -1.701173 | H                                                                                                                                                                                        | -0.237285 | -2.671676 | 5.420382  |
| H                                                                                                                                                                                                                 | -0.187354 | 5.546382  | 1.345469  | H                                                                                                                                                                                        | 0.563156  | 0.246462  | 5.920641  |
| H                                                                                                                                                                                                                 | -1.196840 | 6.391125  | 0.159249  | H                                                                                                                                                                                        | 1.362722  | -1.182597 | 6.602843  |
| H                                                                                                                                                                                                                 | 0.155584  | 2.885686  | -1.597479 | H                                                                                                                                                                                        | -0.012861 | -2.272981 | 2.941766  |
| N                                                                                                                                                                                                                 | -1.273921 | 1.699892  | 0.286051  | N                                                                                                                                                                                        | 1.554528  | -0.268667 | 1.996266  |
| N                                                                                                                                                                                                                 | 1.272211  | 1.665833  | -0.312918 | N                                                                                                                                                                                        | -0.992019 | -0.788859 | 1.813970  |
| C                                                                                                                                                                                                                 | 2.563069  | 1.565105  | -0.464259 | C                                                                                                                                                                                        | -2.091406 | -1.361004 | 1.437432  |
| H                                                                                                                                                                                                                 | 3.087644  | 2.465832  | -0.773512 | H                                                                                                                                                                                        | -2.491801 | -2.140337 | 2.090416  |
| C                                                                                                                                                                                                                 | -2.549942 | 1.608515  | 0.046376  | C                                                                                                                                                                                        | 2.710350  | -0.792183 | 1.754949  |
| H                                                                                                                                                                                                                 | -3.111594 | 2.539046  | 0.000048  | H                                                                                                                                                                                        | 3.299598  | -1.155373 | 2.600836  |

|    |            |           |           |    |           |           |           |
|----|------------|-----------|-----------|----|-----------|-----------|-----------|
| C  | 3.385518   | 0.414967  | -0.302185 | C  | -2.876662 | -1.064923 | 0.281141  |
| C  | 2.812509   | -0.859698 | -0.069966 | C  | -2.536120 | 0.027479  | -0.556863 |
| C  | 4.817891   | 0.556809  | -0.440982 | C  | -4.059281 | -1.850183 | 0.017566  |
| C  | 3.621979   | -2.047299 | -0.021458 | C  | -3.438638 | 0.451560  | -1.610661 |
| C  | 5.606762   | -0.622749 | -0.386582 | C  | -4.908190 | -1.446183 | -1.046502 |
| C  | 5.496396   | 1.774411  | -0.611846 | C  | -4.433441 | -3.005830 | 0.725270  |
| C  | 4.971705   | -1.878577 | -0.184746 | C  | -4.566923 | -0.292228 | -1.808465 |
| C  | 7.001689   | -0.552017 | -0.521132 | C  | -6.069733 | -2.173407 | -1.344525 |
| C  | 6.873618   | 1.819394  | -0.742237 | C  | -5.584084 | -3.709232 | 0.412660  |
| H  | 4.962745   | 2.719996  | -0.630802 | H  | -3.811633 | -3.394851 | 1.525921  |
| H  | 5.622817   | -2.746060 | -0.155313 | H  | -5.261423 | -0.014121 | -2.595374 |
| C  | 7.662793   | 0.651807  | -0.704124 | C  | -6.436320 | -3.305616 | -0.633394 |
| H  | 7.567937   | -1.479322 | -0.476186 | H  | -6.689501 | -1.824684 | -2.168652 |
| H  | 7.352638   | 2.782005  | -0.871905 | H  | -5.821888 | -4.596883 | 0.986586  |
| C  | -3.301746  | 0.422678  | -0.186697 | C  | 3.260588  | -1.012057 | 0.453153  |
| C  | -2.651283  | -0.820890 | -0.395542 | C  | 2.391328  | -1.113802 | -0.664746 |
| C  | -4.739507  | 0.522822  | -0.299888 | C  | 4.661796  | -1.309549 | 0.330728  |
| C  | -3.386421  | -1.987042 | -0.805353 | C  | 2.905962  | -1.597956 | -1.933012 |
| C  | -5.455671  | -0.639953 | -0.685880 | C  | 5.146418  | -1.776206 | -0.917713 |
| C  | -5.486675  | 1.682680  | -0.040726 | C  | 5.596154  | -1.148840 | 1.368051  |
| C  | -4.743722  | -1.846386 | -0.931233 | C  | 4.234853  | -1.908279 | -2.004001 |
| C  | -6.851420  | -0.600255 | -0.824199 | C  | 6.504860  | -2.084810 | -1.075814 |
| C  | -6.863284  | 1.698599  | -0.185172 | C  | 6.931997  | -1.466910 | 1.191239  |
| H  | -5.008251  | 2.596155  | 0.300168  | H  | 5.288130  | -0.736548 | 2.324945  |
| H  | -5.339270  | -2.700846 | -1.235547 | H  | 4.651292  | -2.266744 | -2.940348 |
| C  | -7.581054  | 0.554454  | -0.588293 | C  | 7.418234  | -1.948621 | -0.040683 |
| H  | -7.362219  | -1.511647 | -1.126020 | H  | 6.837867  | -2.435653 | -2.050756 |
| H  | -7.397999  | 2.616381  | 0.025533  | H  | 7.616267  | -1.325081 | 2.019161  |
| O  | -1.356527  | -0.931753 | -0.243753 | O  | 1.124549  | -0.850914 | -0.574234 |
| O  | 1.520751   | -0.980575 | 0.093579  | O  | -1.437506 | 0.689650  | -0.397750 |
| Fe | 0.042981   | 0.152373  | 0.340008  | Fe | 0.230398  | 0.455918  | 0.554270  |
| C  | -2.671161  | -3.303207 | -1.115655 | C  | 1.982348  | -1.712572 | -3.144771 |
| C  | -3.666399  | -4.397655 | -1.513350 | C  | 2.716837  | -2.274734 | -4.365352 |
| H  | -4.377739  | -4.619826 | -0.709349 | H  | 3.546458  | -1.631057 | -4.680688 |
| H  | -4.229370  | -4.136126 | -2.416451 | H  | 3.108362  | -3.282513 | -4.181811 |
| H  | -3.116372  | -5.319442 | -1.728693 | H  | 2.015714  | -2.340067 | -5.204655 |
| C  | -1.707685  | -3.098454 | -2.296565 | C  | 0.803866  | -2.654166 | -2.845072 |
| H  | -2.255296  | -2.782225 | -3.191375 | H  | 1.168059  | -3.654551 | -2.582064 |
| H  | -0.946204  | -2.348206 | -2.073356 | H  | 0.189561  | -2.280010 | -2.025343 |
| H  | -1.199455  | -4.041827 | -2.527425 | H  | 0.174289  | -2.748088 | -3.738317 |
| C  | -1.899018  | -3.810249 | 0.113501  | C  | 1.463596  | -0.314387 | -3.517019 |
| H  | -1.092125  | -3.130850 | 0.393363  | H  | 0.950933  | 0.159120  | -2.679329 |
| H  | -2.571139  | -3.936827 | 0.970727  | H  | 2.296335  | 0.330691  | -3.822562 |
| H  | -1.454834  | -4.787106 | -0.109634 | H  | 0.763642  | -0.386033 | -4.358671 |
| C  | 2.992450   | -3.423150 | 0.200043  | C  | -3.130734 | 1.697064  | -2.442494 |
| C  | 2.014135   | -3.744326 | -0.941499 | C  | -1.790024 | 1.546383  | -3.178828 |
| H  | 1.202327   | -3.017248 | -0.997901 | H  | -0.960835 | 1.433510  | -2.481634 |
| H  | 2.536709   | -3.757211 | -1.904356 | H  | -1.808438 | 0.672210  | -3.840288 |
| H  | 1.574169   | -4.736078 | -0.783436 | H  | -1.602394 | 2.435896  | -3.792470 |
| C  | 2.255717   | -3.460318 | 1.549754  | C  | -3.084449 | 2.928120  | -1.521945 |
| H  | 1.408593   | -2.771019 | 1.557491  | H  | -2.310311 | 2.823571  | -0.760103 |
| H  | 1.865719   | -4.468059 | 1.732777  | H  | -2.861776 | 3.824148  | -2.114847 |
| H  | 2.935943   | -3.208972 | 2.372807  | H  | -4.052075 | 3.077455  | -1.027302 |
| C  | 4.053484   | -4.526994 | 0.228008  | C  | -4.210036 | 1.949806  | -3.498315 |
| H  | 4.773101   | -4.389752 | 1.043548  | H  | -5.196859 | 2.114396  | -3.049568 |
| H  | 3.561377   | -5.492592 | 0.383106  | H  | -3.950779 | 2.851303  | -4.064105 |
| H  | 4.604377   | -4.590052 | -0.717039 | H  | -4.285270 | 1.121786  | -4.213024 |
| C  | -9.099434  | 0.552349  | -0.758684 | C  | 8.890719  | -2.290187 | -0.269370 |
| C  | -9.437932  | 0.178549  | -2.215074 | C  | 9.008431  | -3.761800 | -0.710734 |
| C  | -9.710435  | -0.485962 | 0.202582  | C  | 9.454357  | -1.371103 | -1.370484 |
| C  | -9.717779  | 1.923785  | -0.451261 | C  | 9.733367  | -2.097838 | 0.999843  |
| H  | -9.002193  | 0.908980  | -2.906112 | H  | 8.610935  | -4.422105 | 0.068523  |
| H  | -9.050706  | -0.814870 | -2.467155 | H  | 8.448493  | -3.940154 | -1.635437 |
| H  | -10.526169 | 0.169312  | -2.350372 | H  | 10.061514 | -4.014384 | -0.888364 |

|                                                                                     |            |           |           |                                                                                      |           |           |           |
|-------------------------------------------------------------------------------------|------------|-----------|-----------|--------------------------------------------------------------------------------------|-----------|-----------|-----------|
| H                                                                                   | -9.466980  | -0.232412 | 1.240639  | H                                                                                    | 9.366542  | -0.321926 | -1.066108 |
| H                                                                                   | -10.801032 | -0.497589 | 0.088504  | H                                                                                    | 10.512311 | -1.603833 | -1.546831 |
| H                                                                                   | -9.331472  | -1.491908 | -0.009660 | H                                                                                    | 8.906802  | -1.505999 | -2.309677 |
| H                                                                                   | -10.802888 | 1.862742  | -0.592330 | H                                                                                    | 10.774159 | -2.365818 | 0.782000  |
| H                                                                                   | -9.527158  | 2.222712  | 0.586673  | H                                                                                    | 9.712026  | -1.053425 | 1.333816  |
| H                                                                                   | -9.330638  | 2.695124  | -1.128144 | H                                                                                    | 9.375135  | -2.742258 | 1.811774  |
| C                                                                                   | 9.183662   | 0.678148  | -0.845868 | C                                                                                    | -7.711995 | -4.063496 | -0.999625 |
| C                                                                                   | 9.815412   | 0.094909  | 0.433332  | C                                                                                    | -8.921339 | -3.124344 | -0.827808 |
| C                                                                                   | 9.587829   | -0.175742 | -2.063836 | C                                                                                    | -7.620778 | -4.530175 | -2.465229 |
| C                                                                                   | 9.721109   | 2.101678  | -1.050366 | C                                                                                    | -7.926452 | -5.297745 | -0.110959 |
| H                                                                                   | 9.529876   | 0.693946  | 1.305537  | H                                                                                    | -8.993296 | -2.789802 | 0.213426  |
| H                                                                                   | 9.490667   | -0.938616 | 0.598041  | H                                                                                    | -8.823287 | -2.241618 | -1.469265 |
| H                                                                                   | 10.908196  | 0.102689  | 0.341804  | H                                                                                    | -9.845804 | -3.650714 | -1.097398 |
| H                                                                                   | 9.140555   | 0.230514  | -2.978095 | H                                                                                    | -6.759469 | -5.195106 | -2.595995 |
| H                                                                                   | 10.679070  | -0.170312 | -2.171852 | H                                                                                    | -8.534309 | -5.071236 | -2.742865 |
| H                                                                                   | 9.258877   | -1.214188 | -1.946072 | H                                                                                    | -7.504511 | -3.675914 | -3.141172 |
| H                                                                                   | 10.811501  | 2.058051  | -1.151674 | H                                                                                    | -8.850754 | -5.802280 | -0.416816 |
| H                                                                                   | 9.313619   | 2.552604  | -1.963350 | H                                                                                    | -7.097372 | -6.008151 | -0.215134 |
| H                                                                                   | 9.486342   | 2.742994  | -0.192096 | H                                                                                    | -8.024679 | -5.012582 | 0.943515  |
| O                                                                                   | 0.305616   | -0.083702 | 2.388782  | C                                                                                    | 0.944490  | 3.948344  | -1.724594 |
| H                                                                                   | 1.110517   | -0.621386 | 2.479158  | C                                                                                    | 0.274900  | 5.162277  | -1.522673 |
| C                                                                                   | -0.593257  | -0.390630 | 3.517403  | C                                                                                    | 0.306376  | 6.138682  | -2.509064 |
| C                                                                                   | -0.921995  | -1.873343 | 3.473293  | C                                                                                    | 1.007345  | 5.878031  | -3.687521 |
| C                                                                                   | 0.156610   | -0.005032 | 4.781679  | C                                                                                    | 1.669021  | 4.661200  | -3.881804 |
| C                                                                                   | -1.828428  | 0.461970  | 3.310998  | C                                                                                    | 1.643380  | 3.679147  | -2.896874 |
| H                                                                                   | -1.400428  | -2.137400 | 2.525688  | C                                                                                    | -0.077823 | 3.789481  | 0.347945  |
| H                                                                                   | -0.020838  | -2.485754 | 3.593214  | C                                                                                    | -0.414136 | 5.154663  | -0.182989 |
| H                                                                                   | -1.606584  | -2.128258 | 4.288358  | H                                                                                    | -0.208184 | 7.087001  | -2.373929 |
| H                                                                                   | 0.424628   | 1.055666  | 4.765573  | H                                                                                    | 1.036548  | 6.631996  | -4.469855 |
| H                                                                                   | -0.467149  | -0.192420 | 5.660908  | H                                                                                    | 2.203389  | 4.483902  | -4.811095 |
| H                                                                                   | 1.072538   | -0.597230 | 4.894279  | H                                                                                    | 2.142225  | 2.723305  | -3.026721 |
| H                                                                                   | -2.504201  | 0.329950  | 4.161103  | H                                                                                    | -1.497832 | 5.302575  | -0.287289 |
| H                                                                                   | -1.565600  | 1.522269  | 3.244019  | H                                                                                    | -0.050546 | 5.964234  | 0.464970  |
| H                                                                                   | -2.367734  | 0.169217  | 2.405271  | C                                                                                    | 0.717421  | 3.084985  | -0.558500 |
|                                                                                     |            |           |           | O                                                                                    | 1.166623  | 1.888280  | -0.481313 |
|                                                                                     |            |           |           | C                                                                                    | -0.552969 | 3.208382  | 1.540385  |
|                                                                                     |            |           |           | O                                                                                    | -0.279980 | 2.043075  | 1.923129  |
|                                                                                     |            |           |           | O                                                                                    | -1.348341 | 4.005743  | 2.261324  |
|                                                                                     |            |           |           | C                                                                                    | -2.142018 | 3.497863  | 3.369825  |
|                                                                                     |            |           |           | C                                                                                    | -3.032252 | 2.350035  | 2.904128  |
|                                                                                     |            |           |           | C                                                                                    | -1.239123 | 3.102975  | 4.532451  |
|                                                                                     |            |           |           | C                                                                                    | -2.989969 | 4.705375  | 3.746838  |
|                                                                                     |            |           |           | H                                                                                    | -3.607979 | 2.653015  | 2.022944  |
|                                                                                     |            |           |           | H                                                                                    | -2.451423 | 1.462934  | 2.647600  |
|                                                                                     |            |           |           | H                                                                                    | -3.739241 | 2.093378  | 3.700878  |
|                                                                                     |            |           |           | H                                                                                    | -0.580872 | 3.936236  | 4.800168  |
|                                                                                     |            |           |           | H                                                                                    | -1.851867 | 2.855692  | 5.406582  |
|                                                                                     |            |           |           | H                                                                                    | -0.623529 | 2.240004  | 4.276974  |
|                                                                                     |            |           |           | H                                                                                    | -3.644125 | 4.458532  | 4.589040  |
|                                                                                     |            |           |           | H                                                                                    | -2.352387 | 5.547674  | 4.033489  |
|                                                                                     |            |           |           | H                                                                                    | -3.611140 | 5.013949  | 2.900280  |
| <b>INT 3</b>                                                                        |            |           |           | <b>INT 3'</b>                                                                        |           |           |           |
| 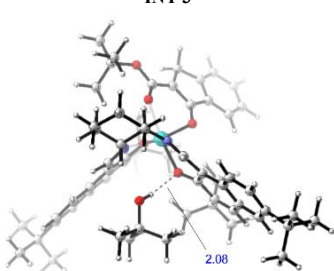 |            |           |           |  |           |           |           |
| E(UPBE1PBE) = -4233.242454                                                          |            |           |           | E(UPBE1PBE) = -4233.241230                                                           |           |           |           |
| Thermal correction to Gibbs Free Energy = 1.218133                                  |            |           |           | Thermal correction to Gibbs Free Energy = 1.217875                                   |           |           |           |
| C                                                                                   | 1.810082   | 0.069642  | 4.480046  | C                                                                                    | -1.540138 | 0.179310  | -4.333682 |

|    |           |           |           |    |           |           |           |
|----|-----------|-----------|-----------|----|-----------|-----------|-----------|
| C  | 0.930978  | 0.477757  | 3.297563  | C  | -0.689394 | 0.325536  | -3.075700 |
| C  | -0.246489 | -0.517944 | 3.172472  | C  | 0.631682  | -0.466958 | -3.194324 |
| C  | -1.123001 | -0.411343 | 4.425997  | C  | 1.433041  | 0.083017  | -4.383478 |
| C  | -0.277957 | -0.752348 | 5.664769  | C  | 0.597307  | -0.022814 | -5.670830 |
| C  | 0.958983  | 0.157824  | 5.761470  | C  | -0.738513 | 0.723285  | -5.527614 |
| H  | 0.507205  | 1.470866  | 3.494929  | H  | -0.413820 | 1.381201  | -2.971696 |
| H  | 2.164524  | -0.962765 | 4.350056  | H  | -1.790239 | -0.877554 | -4.507404 |
| H  | 2.681336  | 0.733678  | 4.555001  | H  | -2.464023 | 0.755675  | -4.202188 |
| H  | -1.512614 | 0.611834  | 4.499602  | H  | 1.677509  | 1.133669  | -4.177053 |
| H  | -1.977491 | -1.095795 | 4.348628  | H  | 2.374566  | -0.465843 | -4.506785 |
| H  | -0.886452 | -0.655835 | 6.572331  | H  | 1.168620  | 0.381093  | -6.515647 |
| H  | 0.052811  | -1.798496 | 5.592960  | H  | 0.395325  | -1.083147 | -5.881281 |
| H  | 0.632124  | 1.198375  | 5.900519  | H  | -0.542801 | 1.792627  | -5.364444 |
| H  | 1.564669  | -0.121317 | 6.632187  | H  | -1.325663 | 0.627706  | -6.448854 |
| H  | 0.185071  | -1.528187 | 3.096282  | H  | 0.368999  | -1.522322 | -3.380214 |
| N  | 1.528429  | 0.539586  | 1.972247  | N  | -1.272509 | -0.092855 | -1.815146 |
| N  | -0.945567 | -0.227902 | 1.919126  | N  | 1.305860  | -0.362105 | -1.891638 |
| C  | -1.843304 | -1.074448 | 1.529668  | C  | 2.505577  | -0.835320 | -1.773395 |
| H  | -2.045088 | -1.915835 | 2.194161  | H  | 2.954152  | -1.269738 | -2.668665 |
| C  | 2.654637  | -0.027584 | 1.703645  | C  | -2.396291 | -0.721248 | -1.733800 |
| H  | 3.250892  | -0.399582 | 2.538887  | H  | -3.016118 | -0.786981 | -2.629641 |
| C  | -2.624241 | -1.018463 | 0.334048  | C  | 3.336664  | -0.836141 | -0.611241 |
| C  | -2.525811 | 0.096096  | -0.535001 | C  | 2.907374  | -0.197453 | 0.579005  |
| C  | -3.548680 | -2.088001 | 0.051743  | C  | 4.639000  | -1.456525 | -0.684258 |
| C  | -3.450307 | 0.245238  | -1.641281 | C  | 3.806828  | -0.073519 | 1.710103  |
| C  | -4.403957 | -1.956494 | -1.074111 | C  | 5.490085  | -1.359817 | 0.448427  |
| C  | -3.656897 | -3.274934 | 0.799884  | C  | 5.135326  | -2.168204 | -1.791037 |
| C  | -4.332672 | -0.774015 | -1.864523 | C  | 5.037568  | -0.655234 | 1.599615  |
| C  | -5.310676 | -2.976257 | -1.399904 | C  | 6.763594  | -1.947285 | 0.434978  |
| C  | -4.557102 | -4.269001 | 0.457248  | C  | 6.396840  | -2.737886 | -1.783243 |
| H  | -3.016125 | -3.452084 | 1.658353  | H  | 4.531448  | -2.306504 | -2.682671 |
| H  | -5.029217 | -0.707584 | -2.694798 | H  | 5.734398  | -0.595255 | 2.429885  |
| C  | -5.411787 | -4.141243 | -0.655514 | C  | 7.246758  | -2.639607 | -0.664027 |
| H  | -5.944672 | -2.833636 | -2.273123 | H  | 7.377296  | -1.848926 | 1.328430  |
| H  | -4.594234 | -5.166551 | 1.062727  | H  | 6.728054  | -3.277506 | -2.662516 |
| C  | 3.179160  | -0.269498 | 0.390629  | C  | -2.867609 | -1.411535 | -0.574036 |
| C  | 2.303811  | -0.332287 | -0.718538 | C  | -1.938727 | -1.849326 | 0.405304  |
| C  | 4.566917  | -0.620552 | 0.256148  | C  | -4.247089 | -1.809231 | -0.518371 |
| C  | 2.813574  | -0.701654 | -2.024881 | C  | -2.366049 | -2.783585 | 1.430801  |
| C  | 5.030874  | -1.063690 | -1.009442 | C  | -4.648985 | -2.711583 | 0.498757  |
| C  | 5.507533  | -0.553032 | 1.299308  | C  | -5.237460 | -1.342532 | -1.400535 |
| C  | 4.128628  | -1.069414 | -2.109172 | C  | -3.676631 | -3.172089 | 1.431930  |
| C  | 6.367972  | -1.454152 | -1.175158 | C  | -5.985588 | -3.126577 | 0.583752  |
| C  | 6.820671  | -0.947880 | 1.113572  | C  | -6.550830 | -1.768359 | -1.298743 |
| H  | 5.223901  | -0.163208 | 2.272554  | H  | -4.991584 | -0.610338 | -2.165100 |
| H  | 4.540123  | -1.371119 | -3.067246 | H  | -4.028539 | -3.862909 | 2.191944  |
| C  | 7.281394  | -1.418201 | -0.132997 | C  | -6.955303 | -2.677987 | -0.301156 |
| H  | 6.682243  | -1.789456 | -2.161671 | H  | -6.255741 | -3.819007 | 1.378671  |
| H  | 7.507736  | -0.880341 | 1.948329  | H  | -7.280938 | -1.379538 | -1.998033 |
| O  | 1.017661  | -0.147291 | -0.583783 | O  | -0.691344 | -1.488280 | 0.375138  |
| O  | -1.633597 | 1.018862  | -0.358875 | O  | 1.720028  | 0.306886  | 0.687664  |
| Fe | 0.051438  | 1.109605  | 0.584996  | Fe | 0.036111  | 0.200646  | -0.244418 |
| C  | 1.925812  | -0.606569 | -3.266820 | C  | -1.378137 | -3.268891 | 2.490575  |
| C  | 2.667548  | -1.055308 | -4.529083 | C  | -2.016998 | -4.286374 | 3.440071  |
| H  | 3.552933  | -0.440867 | -4.728903 | H  | -2.861156 | -3.860298 | 3.994766  |
| H  | 2.976998  | -2.105841 | -4.471977 | H  | -2.364568 | -5.180835 | 2.909413  |
| H  | 1.997741  | -0.954141 | -5.389987 | H  | -1.270347 | -4.606108 | 4.175278  |
| C  | 0.664997  | -1.477646 | -3.151231 | C  | -0.165069 | -3.950586 | 1.835364  |
| H  | 0.935329  | -2.533529 | -3.031258 | H  | -0.484313 | -4.810931 | 1.235062  |
| H  | 0.037887  | -1.175155 | -2.312356 | H  | 0.381898  | -3.260144 | 1.192338  |
| H  | 0.075730  | -1.388646 | -4.072092 | H  | 0.514640  | -4.315591 | 2.614927  |
| C  | 1.532852  | 0.866999  | -3.452476 | C  | -0.921314 | -2.066700 | 3.331836  |
| H  | 1.030953  | 1.262610  | -2.567953 | H  | -0.493477 | -1.281756 | 2.707509  |
| H  | 2.428264  | 1.472529  | -3.639325 | H  | -1.771805 | -1.646146 | 3.881994  |

|   |           |           |           |   |            |           |           |
|---|-----------|-----------|-----------|---|------------|-----------|-----------|
| H | 0.861509  | 0.976162  | -4.312943 | H | -0.166695  | -2.382357 | 4.062841  |
| C | -3.425778 | 1.506588  | -2.504346 | C | 3.386380   | 0.699292  | 2.960616  |
| C | -2.064367 | 1.656986  | -3.201133 | C | 2.121424   | 0.086999  | 3.581601  |
| H | -1.255144 | 1.754212  | -2.478585 | H | 1.278878   | 0.128759  | 2.893162  |
| H | -1.858060 | 0.787249  | -3.836117 | H | 2.293426   | -0.960657 | 3.855247  |
| H | -2.067474 | 2.551735  | -3.835763 | H | 1.850156   | 0.638447  | 4.490018  |
| C | -3.702171 | 2.738630  | -1.625318 | C | 3.129272   | 2.168181  | 2.586457  |
| H | -2.950732 | 2.843294  | -0.840839 | H | 2.350293   | 2.251420  | 1.826988  |
| H | -3.681466 | 3.645015  | -2.243406 | H | 2.803308   | 2.724731  | 3.474201  |
| H | -4.692628 | 2.665962  | -1.159691 | H | 4.045816   | 2.635313  | 2.206197  |
| C | -4.502013 | 1.465432  | -3.592438 | C | 4.480025   | 0.679989  | 4.032170  |
| H | -5.511274 | 1.388025  | -3.170958 | H | 5.409798   | 1.144964  | 3.683444  |
| H | -4.456710 | 2.392733  | -4.173942 | H | 4.134061   | 1.248259  | 4.902521  |
| H | -4.350960 | 0.632211  | -4.288981 | H | 4.705147   | -0.338304 | 4.370805  |
| C | 8.725307  | -1.864495 | -0.364450 | C | -8.400483  | -3.156482 | -0.158745 |
| C | 8.728299  | -3.337954 | -0.815567 | C | -8.440269  | -4.692357 | -0.277536 |
| C | 9.357910  | -0.984196 | -1.459468 | C | -8.938079  | -2.728661 | 1.220672  |
| C | 9.579677  | -1.745100 | 0.905943  | C | -9.316317  | -2.564538 | -1.239882 |
| H | 8.277452  | -3.969538 | -0.041545 | H | -8.056373  | -5.005092 | -1.255232 |
| H | 8.156426  | -3.463506 | -1.741516 | H | -7.829170  | -5.161593 | 0.501282  |
| H | 9.758212  | -3.672912 | -0.993182 | H | -9.473049  | -5.047562 | -0.169911 |
| H | 9.351690  | 0.066670  | -1.148377 | H | -8.908893  | -1.637053 | 1.313789  |
| H | 10.394748 | -1.296740 | -1.637475 | H | -9.974621  | -3.069008 | 1.340421  |
| H | 8.803128  | -1.070598 | -2.400118 | H | -8.334715  | -3.161173 | 2.026430  |
| H | 10.599462 | -2.080737 | 0.682355  | H | -10.333893 | -2.945969 | -1.093316 |
| H | 9.628941  | -0.705815 | 1.252513  | H | -9.348516  | -1.470252 | -1.174909 |
| H | 9.180648  | -2.374302 | 1.710733  | H | -8.981620  | -2.855657 | -2.242902 |
| C | -6.406984 | -5.228271 | -1.061903 | C | 8.636330   | -3.275050 | -0.621857 |
| C | -7.828421 | -4.634147 | -1.085598 | C | 9.686508   | -2.188112 | -0.323023 |
| C | -6.036993 | -5.745406 | -2.465537 | C | 8.662507   | -4.341829 | 0.490146  |
| C | -6.395822 | -6.415719 | -0.088633 | C | 9.004958   | -3.948888 | -1.951276 |
| H | -8.096850 | -4.258295 | -0.091693 | H | 9.668732   | -1.421697 | -1.106171 |
| H | -7.895891 | -3.805852 | -1.799360 | H | 9.489665   | -1.705317 | 0.640275  |
| H | -8.550350 | -5.406005 | -1.381339 | H | 10.687063  | -2.637437 | -0.286988 |
| H | -5.026646 | -6.170104 | -2.455880 | H | 7.916040   | -5.117794 | 0.285413  |
| H | -6.747154 | -6.521462 | -2.778570 | H | 9.655314   | -4.807123 | 0.540791  |
| H | -6.063056 | -4.932085 | -3.199105 | H | 8.437300   | -3.893526 | 1.464234  |
| H | -7.131672 | -7.157491 | -0.421270 | H | 10.011414  | -4.376051 | -1.867924 |
| H | -5.411092 | -6.897815 | -0.065320 | H | 8.307655   | -4.760943 | -2.189910 |
| H | -6.663917 | -6.096123 | 0.925572  | H | 9.006102   | -3.222626 | -2.773105 |
| C | 0.188510  | 4.607036  | -1.801741 | C | -0.851821  | 2.532724  | 3.205228  |
| C | -0.711595 | 5.670874  | -1.650629 | C | -0.336423  | 3.816623  | 3.426915  |
| C | -0.834232 | 6.621344  | -2.654609 | C | -0.392127  | 4.370718  | 4.698607  |
| C | -0.047319 | 6.492185  | -3.799753 | C | -0.965478  | 3.624950  | 5.729476  |
| C | 0.850990  | 5.430110  | -3.941697 | C | -1.476433  | 2.343414  | 5.498758  |
| C | 0.977665  | 4.472978  | -2.940062 | C | -1.423050  | 1.781614  | 4.227496  |
| C | -0.847802 | 4.299537  | 0.246274  | C | -0.001902  | 3.255078  | 1.174835  |
| C | -1.433150 | 5.554952  | -0.334381 | C | 0.234476   | 4.374094  | 2.149063  |
| H | -1.529871 | 7.451218  | -2.556107 | H | 0.004362   | 5.364149  | 4.893734  |
| H | -0.134050 | 7.228263  | -4.594728 | H | -1.013540  | 4.045963  | 6.730335  |
| H | 1.452292  | 5.352960  | -4.843414 | H | -1.914103  | 1.784470  | 6.321200  |
| H | 1.666793  | 3.639934  | -3.032408 | H | -1.804210  | 0.785559  | 4.023758  |
| H | -2.519799 | 5.475423  | -0.477638 | H | 1.301556   | 4.612414  | 2.255750  |
| H | -1.265851 | 6.436251  | 0.299921  | H | -0.266548  | 5.306070  | 1.852791  |
| C | 0.088630  | 3.736322  | -0.621757 | C | -0.633123  | 2.172387  | 1.798678  |
| O | 0.748573  | 2.643660  | -0.495701 | O | -0.962653  | 1.039957  | 1.306795  |
| C | -1.193204 | 3.698001  | 1.472619  | C | 0.375309   | 3.217953  | -0.177620 |
| O | -0.686225 | 2.634105  | 1.910051  | O | 0.142621   | 2.241604  | -0.946204 |
| O | 0.636933  | -2.621421 | 1.096903  | O | -2.513371  | 2.638748  | -2.192915 |
| H | 0.648860  | -1.941542 | 0.400509  | H | -1.769233  | 2.437104  | -1.601010 |
| C | 0.867306  | -3.901363 | 0.516746  | C | -3.550222  | 3.224739  | -1.409232 |
| C | -0.236011 | -4.219674 | -0.489984 | C | -3.987065  | 2.261422  | -0.307460 |
| C | 2.241193  | -3.928925 | -0.149530 | C | -3.054610  | 4.539220  | -0.806884 |
| C | 0.819843  | -4.874008 | 1.687149  | C | -4.689450  | 3.477421  | -2.386066 |

|                                                                                    |           |           |           |                                                                                     |           |          |           |
|------------------------------------------------------------------------------------|-----------|-----------|-----------|-------------------------------------------------------------------------------------|-----------|----------|-----------|
| H                                                                                  | -1.218566 | -4.205392 | -0.007775 | H                                                                                   | -4.395611 | 1.340364 | -0.735273 |
| H                                                                                  | -0.249618 | -3.476242 | -1.294029 | H                                                                                   | -3.140148 | 1.985459 | 0.330621  |
| H                                                                                  | -0.086022 | -5.205700 | -0.944852 | H                                                                                   | -4.758516 | 2.712305 | 0.327389  |
| H                                                                                  | 3.017172  | -3.641279 | 0.567763  | H                                                                                   | -2.691229 | 5.202471 | -1.599462 |
| H                                                                                  | 2.474471  | -4.927443 | -0.536665 | H                                                                                   | -3.852599 | 5.053638 | -0.259504 |
| H                                                                                  | 2.284067  | -3.224427 | -0.987308 | H                                                                                   | -2.232538 | 4.354838 | -0.104459 |
| H                                                                                  | 0.985808  | -5.902213 | 1.349878  | H                                                                                   | -5.550218 | 3.923737 | -1.877709 |
| H                                                                                  | 1.590138  | -4.618406 | 2.422795  | H                                                                                   | -4.363276 | 4.152158 | -3.184678 |
| H                                                                                  | -0.157754 | -4.823039 | 2.179512  | H                                                                                   | -5.006318 | 2.533123 | -2.842389 |
| O                                                                                  | -2.123821 | 4.360745  | 2.165312  | O                                                                                   | 0.992372  | 4.313011 | -0.615960 |
| C                                                                                  | -2.788328 | 3.771133  | 3.318242  | C                                                                                   | 1.575849  | 4.398449 | -1.949479 |
| C                                                                                  | -3.445946 | 2.452417  | 2.926349  | C                                                                                   | 2.585338  | 3.275779 | -2.160153 |
| C                                                                                  | -1.807675 | 3.620218  | 4.475151  | C                                                                                   | 0.475162  | 4.416418 | -3.002643 |
| C                                                                                  | -3.845906 | 4.813026  | 3.656571  | C                                                                                   | 2.286609  | 5.744575 | -1.907827 |
| H                                                                                  | -4.100190 | 2.601426  | 2.060586  | H                                                                                   | 3.314564  | 3.266023 | -1.342838 |
| H                                                                                  | -2.707338 | 1.690669  | 2.672495  | H                                                                                   | 2.103483  | 2.298702 | -2.201106 |
| H                                                                                  | -4.058315 | 2.089195  | 3.759203  | H                                                                                   | 3.126356  | 3.447717 | -3.097316 |
| H                                                                                  | -1.326359 | 4.580319  | 4.689387  | H                                                                                   | -0.231204 | 5.226953 | -2.796181 |
| H                                                                                  | -2.346059 | 3.299028  | 5.373847  | H                                                                                   | 0.918547  | 4.591570 | -3.989242 |
| H                                                                                  | -1.035256 | 2.886082  | 4.244339  | H                                                                                   | -0.086087 | 3.482443 | -3.030374 |
| H                                                                                  | -4.425965 | 4.492421  | 4.527719  | H                                                                                   | 2.763315  | 5.947214 | -2.871991 |
| H                                                                                  | -3.377378 | 5.775963  | 3.883541  | H                                                                                   | 1.574197  | 6.547576 | -1.694450 |
| H                                                                                  | -4.529447 | 4.951269  | 2.813114  | H                                                                                   | 3.056165  | 5.747773 | -1.129583 |
| <b>INT 2'</b>                                                                      |           |           |           | <b>INT 4<sup>SR-1</sup></b>                                                         |           |          |           |
| 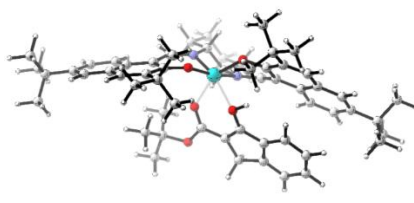 |           |           |           |  |           |          |           |
| E(RPBE1PBE) = -4000.146916                                                         |           |           |           | E(RPBE1PBE) = -4667.708848                                                          |           |          |           |
| Thermal correction to Gibbs Free Energy = 1.102925                                 |           |           |           | Thermal correction to Gibbs Free Energy = 1.289005                                  |           |          |           |
| C                                                                                  | 0.849053  | 3.387943  | 2.770164  | C                                                                                   | -0.10193  | -3.49267 | 3.3087    |
| C                                                                                  | 0.101956  | 2.323759  | 1.964338  | C                                                                                   | -0.71034  | -2.57386 | 2.24928   |
| C                                                                                  | -0.970089 | 1.618990  | 2.847310  | C                                                                                   | -1.88391  | -3.2746  | 1.50659   |
| C                                                                                  | -1.951431 | 2.648277  | 3.414166  | C                                                                                   | -2.94497  | -3.73795 | 2.51272   |
| C                                                                                  | -1.189990 | 3.710977  | 4.220930  | C                                                                                   | -2.3158   | -4.64807 | 3.57984   |
| C                                                                                  | -0.147785 | 4.410380  | 3.339015  | C                                                                                   | -1.18355  | -3.91933 | 4.31214   |
| H                                                                                  | -0.435755 | 2.802928  | 1.131494  | H                                                                                   | -1.12803  | -1.67604 | 2.73006   |
| H                                                                                  | 1.388524  | 2.903671  | 3.597050  | H                                                                                   | 0.30994   | -4.39063 | 2.82541   |
| H                                                                                  | 1.581453  | 3.901195  | 2.133589  | H                                                                                   | 0.71435   | -2.976   | 3.83143   |
| H                                                                                  | -2.485940 | 3.136956  | 2.585978  | H                                                                                   | -3.38518  | -2.85482 | 2.9994    |
| H                                                                                  | -2.688319 | 2.154019  | 4.060143  | H                                                                                   | -3.74513  | -4.28345 | 1.99653   |
| H                                                                                  | -1.899269 | 4.442808  | 4.624009  | H                                                                                   | -3.08819  | -4.96576 | 4.28971   |
| H                                                                                  | -0.686973 | 3.231878  | 5.072414  | H                                                                                   | -1.915    | -5.55123 | 3.09847   |
| H                                                                                  | -0.656043 | 4.924256  | 2.510541  | H                                                                                   | -1.58646  | -3.03094 | 4.81904   |
| H                                                                                  | 0.393746  | 5.167547  | 3.917318  | H                                                                                   | -0.74319  | -4.56973 | 5.07658   |
| H                                                                                  | -0.431590 | 1.132465  | 3.675989  | H                                                                                   | -1.45579  | -4.15088 | 0.99339   |
| N                                                                                  | 0.910865  | 1.242004  | 1.409798  | N                                                                                   | 0.18728   | -2.12419 | 1.19368   |
| N                                                                                  | -1.547077 | 0.565970  | 2.008622  | N                                                                                   | -2.32777  | -2.32382 | 0.48406   |
| C                                                                                  | -2.827808 | 0.464771  | 1.822007  | C                                                                                   | -3.5854   | -2.06764 | 0.31437   |
| H                                                                                  | -3.468819 | 1.139917  | 2.385369  | H                                                                                   | -4.29566  | -2.63084 | 0.91599   |
| C                                                                                  | 2.200170  | 1.217980  | 1.490026  | C                                                                                   | 1.41561   | -2.51532 | 1.10505   |
| H                                                                                  | 2.721918  | 2.105975  | 1.851798  | H                                                                                   | 1.85702   | -3.06779 | 1.93811   |
| C                                                                                  | -3.504401 | -0.433177 | 0.944074  | C                                                                                   | -4.16619  | -1.10812 | -0.57238  |
| C                                                                                  | -2.828077 | -1.533416 | 0.360009  | C                                                                                   | -3.38857  | -0.47642 | -1.57289  |
| C                                                                                  | -4.904392 | -0.207384 | 0.674553  | C                                                                                   | -5.56346  | -0.78504 | -0.41765  |
| C                                                                                  | -3.545507 | -2.516705 | -0.411546 | C                                                                                   | -3.99096  | 0.44696  | -2.50206  |
| C                                                                                  | -5.588324 | -1.158656 | -0.126569 | C                                                                                   | -6.13509  | 0.14925  | -1.31793  |
| C                                                                                  | -5.632518 | 0.915450  | 1.103604  | C                                                                                   | -6.39789  | -1.28548 | 0.60219   |
| C                                                                                  | -4.879695 | -2.290221 | -0.618972 | C                                                                                   | -5.32264  | 0.71874  | -2.33545  |
| C                                                                                  | -6.942953 | -0.975392 | -0.442800 | C                                                                                   | -7.48443  | 0.53173  | -1.19399  |

|    |           |           |           |    |           |          |          |
|----|-----------|-----------|-----------|----|-----------|----------|----------|
| C  | -6.968778 | 1.074223  | 0.779473  | C  | -7.71775  | -0.89664 | 0.70333  |
| H  | -5.160927 | 1.700943  | 1.686990  | H  | -6.02033  | -1.98026 | 1.34634  |
| H  | -5.453188 | -2.997456 | -1.209512 | H  | -5.80987  | 1.42379  | -3.00148 |
| C  | -7.660136 | 0.125848  | -0.001524 | C  | -8.29786  | 0.02525  | -0.19904 |
| H  | -7.430749 | -1.727926 | -1.058151 | H  | -7.8759   | 1.24918  | -1.9091  |
| H  | -7.490341 | 1.954514  | 1.134688  | H  | -8.32583  | -1.30987 | 1.50148  |
| C  | 3.018952  | 0.077726  | 1.194109  | C  | 2.24764   | -2.30981 | -0.04617 |
| C  | 2.476117  | -1.225217 | 1.310891  | C  | 1.65058   | -2.25581 | -1.33753 |
| C  | 4.412001  | 0.273251  | 0.906155  | C  | 3.67636   | -2.33813 | 0.10965  |
| C  | 3.339381  | -2.381533 | 1.232348  | C  | 2.49095   | -2.27588 | -2.51895 |
| C  | 5.249731  | -0.869015 | 0.828229  | C  | 4.48133   | -2.31998 | -1.05674 |
| C  | 4.984797  | 1.524790  | 0.628119  | C  | 4.3325    | -2.31569 | 1.35822  |
| C  | 4.676089  | -2.156438 | 1.016908  | C  | 3.84617   | -2.29872 | -2.33171 |
| C  | 6.609533  | -0.723656 | 0.510276  | C  | 5.88462   | -2.28023 | -0.94617 |
| C  | 6.325585  | 1.642351  | 0.311538  | C  | 5.71072   | -2.2993  | 1.44003  |
| H  | 4.371936  | 2.421764  | 0.615436  | H  | 3.75989   | -2.29939 | 2.28235  |
| H  | 5.352779  | -3.002499 | 0.950688  | H  | 4.50284   | -2.29151 | -3.19578 |
| C  | 7.173103  | 0.515529  | 0.246994  | C  | 6.52422   | -2.27294 | 0.28357  |
| H  | 7.223272  | -1.620643 | 0.460534  | H  | 6.46549   | -2.25808 | -1.86346 |
| H  | 6.726681  | 2.624398  | 0.094468  | H  | 6.17809   | -2.29146 | 2.41858  |
| O  | 1.191950  | -1.413567 | 1.493717  | O  | 0.36349   | -2.23663 | -1.48126 |
| O  | -1.542960 | -1.690677 | 0.533007  | O  | -2.1137   | -0.72507 | -1.6854  |
| Fe | -0.223117 | -0.375264 | 0.759143  | Fe | -0.80834  | -1.14982 | -0.38991 |
| C  | 2.760616  | -3.792600 | 1.346833  | C  | 1.86571   | -2.24103 | -3.91244 |
| C  | 3.856255  | -4.858062 | 1.255951  | C  | 2.93183   | -2.29509 | -5.01017 |
| H  | 4.378957  | -4.836303 | 0.292247  | H  | 3.60966   | -1.4338  | -4.97343 |
| H  | 4.596788  | -4.753799 | 2.056934  | H  | 3.52919   | -3.21303 | -4.96136 |
| H  | 3.401043  | -5.848391 | 1.357390  | H  | 2.43725   | -2.27755 | -5.9868  |
| C  | 2.042980  | -3.972274 | 2.694450  | C  | 0.93959   | -3.45395 | -4.10397 |
| H  | 2.741199  | -3.818395 | 3.524674  | H  | 1.49863   | -4.38969 | -3.98814 |
| H  | 1.210781  | -3.274997 | 2.804250  | H  | 0.11581   | -3.44691 | -3.38862 |
| H  | 1.651205  | -4.993195 | 2.768864  | H  | 0.52008   | -3.4356  | -5.11646 |
| C  | 1.776809  | -4.040368 | 0.189725  | C  | 1.07258   | -0.93714 | -4.09901 |
| H  | 0.907359  | -3.381568 | 0.244849  | H  | 0.28416   | -0.82837 | -3.35448 |
| H  | 2.276654  | -3.914157 | -0.781500 | H  | 1.7347    | -0.066   | -4.03101 |
| H  | 1.405504  | -5.070750 | 0.226438  | H  | 0.61095   | -0.92881 | -5.0933  |
| C  | -2.825687 | -3.737214 | -0.984368 | C  | -3.16136  | 1.08998  | -3.61311 |
| C  | -2.189449 | -4.554666 | 0.151977  | C  | -2.63303  | -0.00493 | -4.55411 |
| H  | -1.467112 | -3.967518 | 0.721639  | H  | -2.03054  | -0.73929 | -4.01662 |
| H  | -2.959589 | -4.918485 | 0.841341  | H  | -3.46498  | -0.52584 | -5.04132 |
| H  | -1.673642 | -5.426932 | -0.266879 | H  | -2.01103  | 0.44632  | -5.33667 |
| C  | -1.751902 | -3.287572 | -1.989717 | C  | -1.9874   | 1.88863  | -3.01965 |
| H  | -0.997923 | -2.651734 | -1.523035 | H  | -1.26816  | 1.23678  | -2.52385 |
| H  | -1.249756 | -4.166406 | -2.411369 | H  | -1.46538  | 2.42656  | -3.81987 |
| H  | -2.207575 | -2.730688 | -2.816983 | H  | -2.34743  | 2.63024  | -2.29557 |
| C  | -3.793528 | -4.661053 | -1.729245 | C  | -3.99937  | 2.06057  | -4.44956 |
| H  | -4.254899 | -4.167694 | -2.592523 | H  | -4.38502  | 2.89366  | -3.84992 |
| H  | -3.241548 | -5.528594 | -2.105562 | H  | -3.37049  | 2.48584  | -5.23861 |
| H  | -4.588432 | -5.036501 | -1.074750 | H  | -4.84398  | 1.56141  | -4.93784 |
| C  | 8.652837  | 0.624167  | -0.120297 | C  | 8.04296   | -2.2535  | 0.43373  |
| C  | 9.501986  | 0.044474  | 1.027456  | C  | 8.48693   | -3.60925 | 1.01924  |
| C  | 8.909491  | -0.175635 | -1.412739 | C  | 8.74936   | -2.04142 | -0.91232 |
| C  | 9.085099  | 2.078091  | -0.358860 | C  | 8.46275   | -1.11844 | 1.38802  |
| H  | 9.321502  | 0.603664  | 1.952289  | H  | 8.01494   | -3.78671 | 1.99234  |
| H  | 9.260826  | -1.009305 | 1.204696  | H  | 8.20655   | -4.42439 | 0.34277  |
| H  | 10.566370 | 0.116541  | 0.773272  | H  | 9.57554   | -3.61841 | 1.15366  |
| H  | 8.318411  | 0.240317  | -2.237613 | H  | 8.44748   | -1.09105 | -1.37086 |
| H  | 9.971383  | -0.119067 | -1.680442 | H  | 9.83226   | -2.01348 | -0.74748 |
| H  | 8.642277  | -1.230759 | -1.284444 | H  | 8.53508   | -2.8602  | -1.60916 |
| H  | 10.150755 | 2.094507  | -0.613844 | H  | 9.55587   | -1.09738 | 1.47053  |
| H  | 8.529522  | 2.527097  | -1.191448 | H  | 8.11879   | -0.1495  | 1.01018  |
| H  | 8.941503  | 2.687000  | 0.541709  | H  | 8.05048   | -1.26563 | 2.39193  |
| C  | -9.133165 | 0.284778  | -0.375132 | C  | -9.76433  | 0.4122   | -0.03512 |
| C  | -9.251273 | 0.382018  | -1.908803 | C  | -10.21165 | 1.43105  | -1.09224 |



|   |            |           |           |   |           |          |          |
|---|------------|-----------|-----------|---|-----------|----------|----------|
| C | -9.917526  | -0.941791 | 0.130344  | C | -10.6331  | -0.8531  | -0.17669 |
| C | -9.754171  | 1.546071  | 0.242058  | C | -9.96971  | 1.03364  | 1.36009  |
| H | -8.698838  | 1.254134  | -2.277375 | H | -9.63301  | 2.35963  | -1.01609 |
| H | -8.849530  | -0.515768 | -2.391587 | H | -10.10649 | 1.02172  | -2.10412 |
| H | -10.305327 | 0.485369  | -2.193771 | H | -11.26842 | 1.67301  | -0.93078 |
| H | -9.832660  | -1.024792 | 1.219649  | H | -10.36982 | -1.60057 | 0.58     |
| H | -10.976556 | -0.837688 | -0.135200 | H | -11.69104 | -0.59188 | -0.05125 |
| H | -9.539987  | -1.866309 | -0.320354 | H | -10.49385 | -1.29808 | -1.16839 |
| H | -10.809324 | 1.601196  | -0.048771 | H | -11.02397 | 1.3057   | 1.49207  |
| H | -9.704347  | 1.517700  | 1.337285  | H | -9.69464  | 0.32885  | 2.15268  |
| H | -9.255653  | 2.453636  | -0.119925 | H | -9.35591  | 1.93576  | 1.46535  |
| C | 2.920278   | 0.297192  | -2.344692 | C | 1.48017   | 2.53395  | -1.03034 |
| C | 3.014187   | 1.549615  | -2.977728 | C | 1.21291   | 3.77911  | -0.44684 |
| C | 4.226121   | 1.956450  | -3.514264 | C | 1.9817    | 4.87962  | -0.79981 |
| C | 5.324094   | 1.101529  | -3.407813 | C | 3.00767   | 4.70474  | -1.73019 |
| C | 5.218424   | -0.146171 | -2.786258 | C | 3.26958   | 3.45553  | -2.30443 |
| C | 4.009455   | -0.565844 | -2.247430 | C | 2.49969   | 2.35093  | -1.9604  |
| C | 0.841501   | 1.302748  | -2.114442 | C | -0.19971  | 2.18045  | 0.53439  |
| C | 1.682848   | 2.252302  | -2.922775 | C | 0.08178   | 3.65854  | 0.54197  |
| H | 4.325570   | 2.920994  | -4.004245 | H | 1.79619   | 5.85733  | -0.36303 |
| H | 6.282612   | 1.411311  | -3.814303 | H | 3.61752   | 5.55775  | -2.01552 |
| H | 6.092199   | -0.783368 | -2.705626 | H | 4.07983   | 3.35318  | -3.0201  |
| H | 3.939439   | -1.527157 | -1.743933 | H | 2.68487   | 1.36709  | -2.38222 |
| H | 1.265068   | 2.410086  | -3.926021 | H | -0.79702  | 4.23531  | 0.22172  |
| H | 1.756890   | 3.242961  | -2.455998 | H | 0.36452   | 4.04328  | 1.53025  |
| C | 1.574146   | 0.187855  | -1.827223 | C | 0.57575   | 1.53746  | -0.45253 |
| O | 1.077676   | -0.873648 | -1.165456 | O | 0.59313   | 0.31201  | -0.78413 |
| C | -0.521258  | 1.465427  | -1.692747 | C | -1.28446  | 1.52159  | 1.17954  |
| O | -1.038795  | 0.769302  | -0.793971 | O | -1.56372  | 0.31509  | 1.01191  |
| O | -1.180323  | 2.406537  | -2.328422 | C | 1.87174   | 0.8995   | 1.90099  |
| C | -2.616103  | 2.673937  | -2.088509 | H | 1.20453   | 0.04888  | 1.81802  |
| C | -3.433082  | 1.431413  | -2.412374 | N | 2.9626    | 0.80368  | 1.18804  |
| C | -2.818495  | 3.147471  | -0.656888 | C | 4.0974    | 1.59194  | 0.93114  |
| C | -2.903080  | 3.791858  | -3.076866 | C | 4.23198   | 2.93901  | 1.27869  |
| H | -3.225869  | 1.094999  | -3.433333 | C | 5.11705   | 0.94823  | 0.2083   |
| H | -3.230991  | 0.616298  | -1.716119 | C | 5.37351   | 3.63123  | 0.91056  |
| H | -4.497515  | 1.677571  | -2.343178 | H | 3.44254   | 3.4454   | 1.81519  |
| H | -2.166444  | 4.000082  | -0.436483 | C | 6.24679   | 1.64012  | -0.15951 |
| H | -3.857214  | 3.470323  | -0.533513 | H | 5.03591   | -0.10156 | -0.05122 |
| H | -2.622964  | 2.344150  | 0.053503  | C | 6.38917   | 2.99391  | 0.18482  |
| H | -3.953192  | 4.088913  | -3.002217 | H | 5.45367   | 4.67829  | 1.17735  |
| H | -2.279008  | 4.666448  | -2.868404 | H | 7.03848   | 1.1543   | -0.71957 |
| H | -2.709256  | 3.461138  | -4.101503 | O | 7.51644   | 3.585    | -0.2268  |
| H | 1.765124   | -1.538846 | -0.987953 | C | 7.72089   | 4.9499   | 0.09095  |
|   |            |           |           | H | 7.74568   | 5.10398  | 1.17596  |
|   |            |           |           | H | 8.68886   | 5.21175  | -0.33569 |
|   |            |           |           | H | 6.94235   | 5.58029  | -0.35476 |
|   |            |           |           | C | 1.50063   | 1.89665  | 2.93031  |
|   |            |           |           | O | 1.94545   | 3.01186  | 3.08917  |
|   |            |           |           | O | 0.55866   | 1.34486  | 3.69851  |
|   |            |           |           | C | 0.0396    | 2.2027   | 4.72033  |
|   |            |           |           | H | -0.67302  | 1.59389  | 5.27445  |
|   |            |           |           | H | 0.84568   | 2.54714  | 5.37162  |
|   |            |           |           | H | -0.45947  | 3.05919  | 4.26291  |
|   |            |           |           | H | 2.96873   | -0.05584 | 0.62895  |
|   |            |           |           | O | -1.9757   | 2.3009   | 2.00354  |
|   |            |           |           | C | -3.32939  | 1.95876  | 2.4659   |
|   |            |           |           | C | -4.25412  | 1.98283  | 1.25915  |
|   |            |           |           | C | -3.36519  | 0.62301  | 3.19977  |
|   |            |           |           | C | -3.64998  | 3.09795  | 3.4212   |
|   |            |           |           | H | -4.2519   | 2.9745   | 0.79567  |
|   |            |           |           | H | -3.94976  | 1.24279  | 0.51701  |
|   |            |           |           | H | -5.27811  | 1.74445  | 1.56364  |
|   |            |           |           | H | -2.55091  | 0.56286  | 3.93011  |

|                                                                                   |           |           |                                                                                    |          |           |           |           |
|-----------------------------------------------------------------------------------|-----------|-----------|------------------------------------------------------------------------------------|----------|-----------|-----------|-----------|
|                                                                                   |           | H         | -4.31399                                                                           | 0.54667  | 3.74153   |           |           |
|                                                                                   |           | H         | -3.28273                                                                           | -0.21828 | 2.51199   |           |           |
|                                                                                   |           | H         | -4.68556                                                                           | 3.01282  | 3.76345   |           |           |
|                                                                                   |           | H         | -2.99621                                                                           | 3.07406  | 4.29927   |           |           |
|                                                                                   |           | H         | -3.52869                                                                           | 4.06353  | 2.92143   |           |           |
| <b>INT 4<sup>SR</sup></b>                                                         |           |           | <b>INT 4<sup>RS</sup></b>                                                          |          |           |           |           |
| 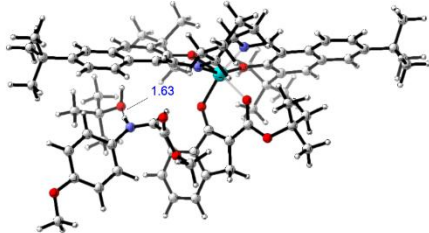 |           |           |  |          |           |           |           |
| E(UPBE1PBE) = -4901.206977                                                        |           |           | E(UPBE1PBE) = -4901.202737                                                         |          |           |           |           |
| Thermal correction to Gibbs Free Energy= 1.416355                                 |           |           | Thermal correction to Gibbs Free Energy= 1.421506                                  |          |           |           |           |
| C                                                                                 | -0.255144 | -0.003113 | 4.491613                                                                           | C        | 1.365996  | -1.033712 | 4.441732  |
| C                                                                                 | -0.961439 | -0.096588 | 3.139013                                                                           | C        | 0.534890  | -0.973786 | 3.158559  |
| C                                                                                 | -2.112896 | -1.144104 | 3.175969                                                                           | C        | -0.424676 | -2.193612 | 3.056534  |
| C                                                                                 | -3.099594 | -0.815760 | 4.304510                                                                           | C        | -1.319214 | -2.285363 | 4.296190  |
| C                                                                                 | -2.369775 | -0.695289 | 5.650938                                                                           | C        | -0.469922 | -2.323680 | 5.575355  |
| C                                                                                 | -1.272993 | 0.373867  | 5.578445                                                                           | C        | 0.431886  | -1.085777 | 5.659693  |
| H                                                                                 | -1.417795 | 0.872945  | 2.892241                                                                           | H        | -0.110587 | -0.081615 | 3.175993  |
| H                                                                                 | 0.185940  | -0.976896 | 4.749983                                                                           | H        | 1.989676  | -1.939476 | 4.431810  |
| H                                                                                 | 0.550591  | 0.740683  | 4.435120                                                                           | H        | 2.033742  | -0.163609 | 4.502578  |
| H                                                                                 | -3.598263 | 0.136734  | 4.074220                                                                           | H        | -1.972394 | -1.403216 | 4.326588  |
| H                                                                                 | -3.866099 | -1.597425 | 4.379477                                                                           | H        | -1.952404 | -3.180247 | 4.244357  |
| H                                                                                 | -3.093851 | -0.448859 | 6.436349                                                                           | H        | -1.128028 | -2.379492 | 6.450361  |
| H                                                                                 | -1.915649 | -1.662464 | 5.909032                                                                           | H        | 0.155704  | -3.227117 | 5.571975  |
| H                                                                                 | -1.724866 | 1.347225  | 5.339484                                                                           | H        | -0.192568 | -0.180237 | 5.683563  |
| H                                                                                 | -0.766147 | 0.467603  | 6.545813                                                                           | H        | 1.024329  | -1.105924 | 6.581620  |
| H                                                                                 | -1.640962 | -2.120753 | 3.372852                                                                           | H        | 0.211395  | -3.091376 | 2.994838  |
| N                                                                                 | -0.142904 | -0.499590 | 2.000244                                                                           | N        | 1.275025  | -0.985005 | 1.899540  |
| N                                                                                 | -2.670988 | -1.167707 | 1.820518                                                                           | N        | -1.108938 | -2.041509 | 1.772602  |
| C                                                                                 | -3.949898 | -1.202417 | 1.628652                                                                           | C        | -2.390079 | -2.182395 | 1.652219  |
| H                                                                                 | -4.585186 | -1.289800 | 2.507577                                                                           | H        | -2.958975 | -2.438428 | 2.546164  |
| C                                                                                 | 1.060994  | -0.938560 | 2.155450                                                                           | C        | 2.564865  | -1.131505 | 1.863528  |
| H                                                                                 | 1.541782  | -0.807362 | 3.125294                                                                           | H        | 3.128832  | -0.981551 | 2.785903  |
| C                                                                                 | -4.648984 | -1.113388 | 0.383462                                                                           | C        | -3.153160 | -2.057448 | 0.450327  |
| C                                                                                 | -3.958793 | -1.198290 | -0.849353                                                                          | C        | -2.523265 | -2.129625 | -0.818216 |
| C                                                                                 | -6.076587 | -0.906139 | 0.408961                                                                           | C        | -4.581644 | -1.892183 | 0.551150  |
| C                                                                                 | -4.672395 | -1.142325 | -2.101229                                                                          | C        | -3.324776 | -2.243980 | -2.019122 |
| C                                                                                 | -6.762082 | -0.828522 | -0.829843                                                                          | C        | -5.336727 | -1.850427 | -0.649845 |
| C                                                                                 | -6.843366 | -0.717070 | 1.577121                                                                           | C        | -5.280322 | -1.689033 | 1.755244  |
| C                                                                                 | -6.028037 | -0.963266 | -2.039560                                                                          | C        | -4.674790 | -2.075658 | -1.889741 |
| C                                                                                 | -8.149451 | -0.591907 | -0.868748                                                                          | C        | -6.712916 | -1.583853 | -0.612507 |
| C                                                                                 | -8.201592 | -0.483508 | 1.513990                                                                           | C        | -6.640599 | -1.428031 | 1.767701  |
| H                                                                                 | -6.383119 | -0.735501 | 2.560377                                                                           | H        | -4.763331 | -1.713298 | 2.710153  |
| H                                                                                 | -6.599976 | -0.898623 | -2.959818                                                                          | H        | -5.303756 | -2.102725 | -2.773694 |
| C                                                                                 | -8.892902 | -0.416838 | 0.282256                                                                           | C        | -7.389806 | -1.356018 | 0.576709  |
| H                                                                                 | -8.628281 | -0.542926 | -1.842172                                                                          | H        | -7.251449 | -1.551950 | -1.557447 |
| H                                                                                 | -8.752615 | -0.344333 | 2.438399                                                                           | H        | -7.132892 | -1.273473 | 2.720151  |
| C                                                                                 | 1.813612  | -1.683507 | 1.184590                                                                           | C        | 3.321429  | -1.558226 | 0.728691  |
| C                                                                                 | 1.126494  | -2.390412 | 0.161274                                                                           | C        | 2.698799  | -2.377090 | -0.251291 |
| C                                                                                 | 3.214479  | -1.904941 | 1.421485                                                                           | C        | 4.738373  | -1.315784 | 0.687089  |
| C                                                                                 | 1.834337  | -3.397281 | -0.617839                                                                          | C        | 3.508189  | -3.107892 | -1.207322 |
| C                                                                                 | 3.876678  | -2.922114 | 0.690404                                                                           | C        | 5.497125  | -1.933936 | -0.339675 |
| C                                                                                 | 3.982547  | -1.151561 | 2.331837                                                                           | C        | 5.417981  | -0.470290 | 1.580163  |
| C                                                                                 | 3.144840  | -3.643162 | -0.302290                                                                          | C        | 4.848703  | -2.840103 | -1.228957 |
| C                                                                                 | 5.240664  | -3.185065 | 0.913851                                                                           | C        | 6.867734  | -1.663734 | -0.460361 |
| C                                                                                 | 5.322494  | -1.427083 | 2.533126                                                                           | C        | 6.777401  | -0.230743 | 1.449108  |
| H                                                                                 | 3.534440  | -0.318232 | 2.866996                                                                           | H        | 4.885386  | 0.024502  | 2.387190  |
| H                                                                                 | 3.683773  | -4.420867 | -0.836619                                                                          | H        | 5.480975  | -3.335672 | -1.959138 |

|    |            |           |           |    |            |           |           |
|----|------------|-----------|-----------|----|------------|-----------|-----------|
| C  | 5.986726   | -2.456151 | 1.825720  | C  | 7.532877   | -0.811911 | 0.410757  |
| H  | 5.704132   | -3.989447 | 0.348496  | H  | 7.415696   | -2.149650 | -1.265019 |
| H  | 5.877832   | -0.830996 | 3.251196  | H  | 7.265796   | 0.415151  | 2.169770  |
| O  | -0.129175  | -2.221028 | -0.062761 | O  | 1.414292   | -2.540052 | -0.281057 |
| O  | -2.664946  | -1.342823 | -0.885657 | O  | -1.228962  | -2.130295 | -0.931775 |
| Fe | -1.305731  | -0.701903 | 0.260266  | Fe | 0.057248   | -1.266472 | 0.219203  |
| C  | 1.116111   | -4.122120 | -1.753682 | C  | 2.861000   | -4.122870 | -2.150370 |
| C  | 2.027545   | -5.145176 | -2.436214 | C  | 3.908921   | -4.836493 | -3.008703 |
| H  | 2.912248   | -4.680690 | -2.886288 | H  | 4.444574   | -4.142965 | -3.667634 |
| H  | 2.357569   | -5.928947 | -1.744360 | H  | 4.642326   | -5.375361 | -2.397711 |
| H  | 1.472534   | -5.634333 | -3.243108 | H  | 3.407071   | -5.570558 | -3.647823 |
| C  | -0.114582  | -4.881490 | -1.228447 | C  | 2.124948   | -5.193960 | -1.327091 |
| H  | 0.181573   | -5.622734 | -0.477025 | H  | 2.817879   | -5.703296 | -0.647247 |
| H  | -0.847464  | -4.206770 | -0.785537 | H  | 1.313559   | -4.758607 | -0.741052 |
| H  | -0.590347  | -5.416057 | -2.058791 | H  | 1.699979   | -5.946232 | -2.001956 |
| C  | 0.692250   | -3.084625 | -2.809648 | C  | 1.874457   | -3.428941 | -3.103484 |
| H  | 0.013573   | -2.338068 | -2.393359 | H  | 1.103877   | -2.880997 | -2.559099 |
| H  | 1.569513   | -2.565119 | -3.215320 | H  | 2.400805   | -2.735426 | -3.768715 |
| H  | 0.182574   | -3.588618 | -3.638891 | H  | 1.379881   | -4.181468 | -3.729051 |
| C  | -3.922432  | -1.256511 | -3.428395 | C  | -2.670812  | -2.549154 | -3.365814 |
| C  | -3.214414  | -2.619117 | -3.511220 | C  | -1.907501  | -3.880125 | -3.261555 |
| H  | -2.507489  | -2.754096 | -2.690807 | H  | -1.141915  | -3.843713 | -2.484465 |
| H  | -3.945786  | -3.434808 | -3.479191 | H  | -2.597638  | -4.700706 | -3.034388 |
| H  | -2.665823  | -2.694017 | -4.458151 | H  | -1.419164  | -4.103736 | -4.217633 |
| C  | -2.894636  | -0.118313 | -3.559099 | C  | -1.716512  | -1.418442 | -3.780108 |
| H  | -2.111721  | -0.193186 | -2.803764 | H  | -0.902958  | -1.294524 | -3.064935 |
| H  | -2.422576  | -0.160966 | -4.548125 | H  | -1.284973  | -1.642690 | -4.763240 |
| H  | -3.383119  | 0.858669  | -3.460654 | H  | -2.264173  | -0.471714 | -3.855229 |
| C  | -4.876657  | -1.154999 | -4.621485 | C  | -3.713869  | -2.695752 | -4.476873 |
| H  | -5.393499  | -0.188640 | -4.654623 | H  | -4.266025  | -1.764174 | -4.648866 |
| H  | -4.302133  | -1.252878 | -5.548713 | H  | -3.205858  | -2.953972 | -5.412059 |
| H  | -5.628437  | -1.952448 | -4.615318 | H  | -4.433309  | -3.493898 | -4.261484 |
| C  | 7.467038   | -2.719136 | 2.088795  | C  | 9.026338   | -0.543212 | 0.228210  |
| C  | 7.646948   | -3.119108 | 3.566125  | C  | 9.795848   | -1.872066 | 0.359339  |
| C  | 8.015596   | -3.847634 | 1.204778  | C  | 9.261876   | 0.058760  | -1.170780 |
| C  | 8.274996   | -1.438922 | 1.796542  | C  | 9.570558   | 0.438022  | 1.276110  |
| H  | 7.297839   | -2.324663 | 4.235007  | H  | 9.631838   | -2.308445 | 1.351032  |
| H  | 7.078680   | -4.030687 | 3.782018  | H  | 9.465359   | -2.593065 | -0.396325 |
| H  | 8.707519   | -3.306012 | 3.773720  | H  | 10.869982  | -1.695888 | 0.223256  |
| H  | 7.926167   | -3.596693 | 0.140365  | H  | 8.716889   | 1.004697  | -1.272711 |
| H  | 9.077552   | -3.995762 | 1.431177  | H  | 10.331869  | 0.249570  | -1.318128 |
| H  | 7.491599   | -4.791054 | 1.398452  | H  | 8.922282   | -0.625419 | -1.956124 |
| H  | 9.338618   | -1.620279 | 1.991972  | H  | 10.639857  | 0.596045  | 1.094764  |
| H  | 8.157861   | -1.146239 | 0.745578  | H  | 9.066027   | 1.409988  | 1.208686  |
| H  | 7.947637   | -0.610724 | 2.436582  | H  | 9.453284   | 0.039464  | 2.291001  |
| C  | -10.394600 | -0.147917 | 0.278465  | C  | -8.883556  | -1.033660 | 0.559907  |
| C  | -10.970894 | -0.124044 | -1.143998 | C  | -9.104418  | 0.259003  | -0.250553 |
| C  | -11.107699 | -1.257369 | 1.075691  | C  | -9.646228  | -2.198259 | -0.100256 |
| C  | -10.659567 | 1.220326  | 0.936669  | C  | -9.446136  | -0.821720 | 1.972658  |
| H  | -10.511366 | 0.671178  | -1.743515 | H  | -8.563199  | 1.092359  | 0.214711  |
| H  | -10.820799 | -1.086939 | -1.647114 | H  | -8.749219  | 0.141224  | -1.280485 |
| H  | -12.048533 | 0.068693  | -1.090207 | H  | -10.172942 | 0.505689  | -0.277802 |
| H  | -10.755875 | -1.288736 | 2.112767  | H  | -9.490423  | -3.121773 | 0.468504  |
| H  | -12.188657 | -1.070974 | 1.083521  | H  | -10.719743 | -1.974197 | -0.125045 |
| H  | -10.920073 | -2.233694 | 0.614793  | H  | -9.303138  | -2.361484 | -1.127867 |
| H  | -11.737614 | 1.421880  | 0.952717  | H  | -10.515646 | -0.592963 | 1.900212  |
| H  | -10.289495 | 1.240391  | 1.967960  | H  | -9.331495  | -1.725253 | 2.583256  |
| H  | -10.159687 | 2.014483  | 0.370016  | H  | -8.951382  | 0.018645  | 2.474979  |
| C  | 0.739445   | 2.167904  | -2.359611 | C  | -2.791105  | 1.499605  | -1.264472 |
| C  | 0.404753   | 3.522169  | -2.509747 | C  | -2.641027  | 2.169838  | -2.489713 |
| C  | 1.157878   | 4.335864  | -3.343155 | C  | -3.751645  | 2.723834  | -3.111804 |
| C  | 2.241109   | 3.776887  | -4.023824 | C  | -5.001927  | 2.590544  | -2.501315 |
| C  | 2.560047   | 2.422893  | -3.883415 | C  | -5.146841  | 1.901861  | -1.293892 |
| C  | 1.807611   | 1.598286  | -3.050352 | C  | -4.036632  | 1.348780  | -0.661915 |

|   |           |           |           |   |           |           |           |
|---|-----------|-----------|-----------|---|-----------|-----------|-----------|
| C | -1.069536 | 2.548455  | -0.967535 | C | -0.557268 | 1.327009  | -1.829319 |
| C | -0.798384 | 3.848524  | -1.668583 | C | -1.203144 | 2.107750  | -2.934967 |
| H | 0.910535  | 5.386490  | -3.472331 | H | -3.661202 | 3.232835  | -4.068759 |
| H | 2.837648  | 4.399825  | -4.684667 | H | -5.879445 | 3.011324  | -2.984341 |
| H | 3.394643  | 2.011919  | -4.442588 | H | -6.133204 | 1.771417  | -0.858491 |
| H | 2.043139  | 0.542236  | -2.941491 | H | -4.144337 | 0.769165  | 0.248824  |
| H | -1.644406 | 4.171689  | -2.290694 | H | -0.757172 | 3.104593  | -3.053755 |
| H | -0.601253 | 4.674280  | -0.971581 | H | -1.109142 | 1.607994  | -3.908437 |
| C | -0.179933 | 1.563890  | -1.381472 | C | -1.478366 | 0.990547  | -0.848707 |
| O | -0.069853 | 0.340858  | -0.993704 | O | -1.264389 | 0.373061  | 0.269030  |
| C | -2.105281 | 2.294701  | -0.037525 | C | 0.815596  | 0.982941  | -1.712461 |
| O | -2.293774 | 1.185822  | 0.514573  | O | 1.246075  | 0.142385  | -0.888800 |
| C | 2.588733  | 1.197767  | 0.017684  | C | 1.516101  | 2.393227  | 2.389808  |
| H | 1.797471  | 0.522966  | -0.323065 | H | 1.091613  | 1.723657  | 3.129817  |
| N | 3.795532  | 0.974009  | -0.341958 | N | 0.624464  | 2.954560  | 1.634355  |
| C | 4.912101  | 1.816342  | -0.074173 | C | 0.549435  | 3.846487  | 0.568374  |
| C | 4.898001  | 3.137908  | -0.507473 | C | -0.744876 | 3.997107  | 0.041238  |
| C | 6.030370  | 1.272586  | 0.562478  | C | 1.612618  | 4.577959  | 0.007600  |
| C | 6.010699  | 3.942763  | -0.286859 | C | -0.992071 | 4.840132  | -1.022417 |
| H | 4.037389  | 3.524386  | -1.045556 | H | -1.567372 | 3.434663  | 0.467991  |
| C | 7.130822  | 2.075296  | 0.784657  | C | 1.371795  | 5.408386  | -1.061490 |
| H | 6.002869  | 0.246913  | 0.916926  | H | 2.608182  | 4.494658  | 0.415340  |
| C | 7.132925  | 3.415382  | 0.362604  | C | 0.075444  | 5.543635  | -1.598176 |
| H | 5.998865  | 4.967667  | -0.638340 | H | -2.000232 | 4.915143  | -1.411910 |
| H | 8.010811  | 1.690358  | 1.289082  | H | 2.174329  | 5.981281  | -1.513749 |
| O | 8.255732  | 4.101319  | 0.622008  | O | -0.035365 | 6.357794  | -2.645535 |
| C | 8.327260  | 5.454723  | 0.216520  | C | -1.313586 | 6.534495  | -3.238411 |
| H | 7.553477  | 6.057734  | 0.706952  | H | -2.016757 | 6.980403  | -2.526466 |
| H | 9.311088  | 5.806317  | 0.526783  | H | -1.158363 | 7.214493  | -4.075117 |
| H | 8.233694  | 5.548577  | -0.872178 | H | -1.710529 | 5.581167  | -3.605771 |
| C | 2.207975  | 2.249253  | 1.016742  | C | 2.996211  | 2.417615  | 2.470653  |
| O | 2.183861  | 1.967634  | 2.190474  | O | 3.526195  | 1.713522  | 3.304045  |
| O | 1.859768  | 3.392923  | 0.464677  | O | 3.633019  | 3.204153  | 1.620936  |
| C | 1.317446  | 4.377333  | 1.359801  | C | 5.071056  | 3.140579  | 1.669171  |
| H | 1.266387  | 5.295764  | 0.778194  | H | 5.413813  | 3.928878  | 1.001104  |
| H | 0.317933  | 4.064317  | 1.671588  | H | 5.416235  | 3.313839  | 2.690058  |
| H | 1.964239  | 4.497889  | 2.230254  | H | 5.404622  | 2.160807  | 1.319236  |
| H | 3.953933  | 0.124050  | -0.956967 | H | -0.335411 | 2.585839  | 1.921282  |
| O | 3.972161  | -1.089677 | -2.041110 | O | 1.611106  | 1.650545  | -2.536960 |
| C | 5.157620  | -1.323095 | -2.844267 | C | 3.047935  | 1.387288  | -2.661914 |
| C | 5.201483  | -0.174322 | -3.836965 | C | 3.755149  | 1.636071  | -1.338042 |
| C | 6.390378  | -1.321573 | -1.947940 | C | 3.260963  | -0.027913 | -3.168974 |
| C | 4.999263  | -2.658369 | -3.556763 | C | 3.474924  | 2.413821  | -3.699637 |
| H | 4.321014  | -0.196705 | -4.486918 | H | 3.551778  | 2.653371  | -0.989930 |
| H | 5.227787  | 0.787291  | -3.311905 | H | 3.438339  | 0.920363  | -0.578670 |
| H | 6.097283  | -0.243999 | -4.461330 | H | 4.835710  | 1.526056  | -1.480309 |
| H | 6.278243  | -2.042443 | -1.131891 | H | 2.702402  | -0.188934 | -4.096880 |
| H | 7.284378  | -1.583901 | -2.523238 | H | 4.324784  | -0.188014 | -3.372636 |
| H | 6.552585  | -0.331749 | -1.508293 | H | 2.945550  | -0.764019 | -2.430308 |
| H | 5.832750  | -2.828426 | -4.245201 | H | 4.549326  | 2.329192  | -3.888505 |
| H | 4.989645  | -3.486266 | -2.838096 | H | 2.942527  | 2.254475  | -4.642229 |
| H | 4.066705  | -2.681595 | -4.129623 | H | 3.260053  | 3.428093  | -3.347069 |
| H | 3.727800  | -1.915576 | -1.583644 | O | -1.529238 | 1.716528  | 2.498967  |
| O | -2.868635 | 3.350924  | 0.225801  | C | -2.677081 | 2.157977  | 3.255003  |
| C | -4.179856 | 3.239321  | 0.874710  | C | -2.118286 | 2.590950  | 4.602185  |
| C | -5.104413 | 2.457019  | -0.046125 | C | -3.351127 | 3.324173  | 2.540406  |
| C | -4.072191 | 2.613749  | 2.260114  | C | -3.641675 | 0.993128  | 3.412991  |
| C | -4.615613 | 4.692621  | 0.982261  | H | -1.618716 | 1.750071  | 5.095240  |
| H | -5.198296 | 2.965010  | -1.011326 | H | -1.391359 | 3.401996  | 4.478500  |
| H | -4.732321 | 1.444483  | -0.212031 | H | -2.917365 | 2.951818  | 5.256475  |
| H | -6.100456 | 2.375628  | 0.400719  | H | -3.700490 | 3.025164  | 1.545310  |
| H | -3.283094 | 3.103793  | 2.841969  | H | -4.219456 | 3.672627  | 3.108911  |
| H | -5.021122 | 2.758234  | 2.787759  | H | -2.660664 | 4.168729  | 2.435443  |
| H | -3.859516 | 1.546945  | 2.199904  | H | -4.502166 | 1.286998  | 4.022405  |

|                                                                                                                                                                                                         |           |           |           |                                                                                                                                                                                                          |           |           |           |
|---------------------------------------------------------------------------------------------------------------------------------------------------------------------------------------------------------|-----------|-----------|-----------|----------------------------------------------------------------------------------------------------------------------------------------------------------------------------------------------------------|-----------|-----------|-----------|
| H                                                                                                                                                                                                       | -5.623472 | 4.748122  | 1.404325  | H                                                                                                                                                                                                        | -4.024020 | 0.651012  | 2.446069  |
| H                                                                                                                                                                                                       | -3.936107 | 5.256233  | 1.629939  | H                                                                                                                                                                                                        | -3.145754 | 0.151386  | 3.904245  |
| H                                                                                                                                                                                                       | -4.626028 | 5.163492  | -0.005288 | H                                                                                                                                                                                                        | -1.748591 | 1.133577  | 1.725560  |
| 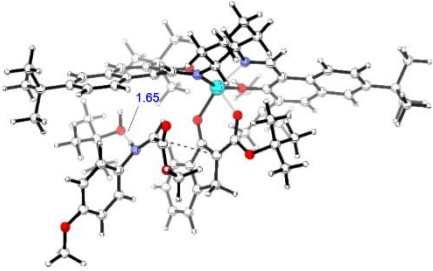 <p><b>TS<sup>SR</sup></b></p> <p>E(UPBE1PBE) = -4901.206377<br/>Thermal correction to Gibbs Free Energy= 1.419386</p> |           |           |           |  <p><b>TS<sup>RS</sup></b></p> <p>E(UPBE1PBE) = -4901.200180<br/>Thermal correction to Gibbs Free Energy= 1.419693</p> |           |           |           |
| C                                                                                                                                                                                                       | 0.680905  | -2.079880 | -4.382407 | C                                                                                                                                                                                                        | 1.245979  | -0.353742 | 4.542231  |
| C                                                                                                                                                                                                       | 1.265309  | -1.563320 | -3.067962 | C                                                                                                                                                                                                        | 0.503576  | -0.612151 | 3.229583  |
| C                                                                                                                                                                                                       | 2.484999  | -2.418002 | -2.617340 | C                                                                                                                                                                                                        | -0.256423 | -1.974189 | 3.287624  |
| C                                                                                                                                                                                                       | 3.548618  | -2.458906 | -3.721211 | C                                                                                                                                                                                                        | -1.210959 | -2.016417 | 4.482615  |
| C                                                                                                                                                                                                       | 2.940015  | -2.969312 | -5.036570 | C                                                                                                                                                                                                        | -0.442525 | -1.750469 | 5.785556  |
| C                                                                                                                                                                                                       | 1.768086  | -2.079266 | -5.467086 | C                                                                                                                                                                                                        | 0.261598  | -0.389561 | 5.720868  |
| H                                                                                                                                                                                                       | 1.623743  | -0.534863 | -3.203180 | H                                                                                                                                                                                                        | -0.255033 | 0.168711  | 3.069459  |
| H                                                                                                                                                                                                       | 0.310262  | -3.106352 | -4.244775 | H                                                                                                                                                                                                        | 2.010428  | -1.131095 | 4.686853  |
| H                                                                                                                                                                                                       | -0.160150 | -1.444527 | -4.689863 | H                                                                                                                                                                                                        | 1.751947  | 0.620243  | 4.505208  |
| H                                                                                                                                                                                                       | 3.945250  | -1.444627 | -3.875924 | H                                                                                                                                                                                                        | -1.978203 | -1.241128 | 4.356833  |
| H                                                                                                                                                                                                       | 4.378844  | -3.112557 | -3.424610 | H                                                                                                                                                                                                        | -1.711765 | -2.992022 | 4.533569  |
| H                                                                                                                                                                                                       | 3.712727  | -2.987202 | -5.813959 | H                                                                                                                                                                                                        | -1.135345 | -1.782058 | 6.634567  |
| H                                                                                                                                                                                                       | 2.582619  | -3.999431 | -4.898320 | H                                                                                                                                                                                                        | 0.305257  | -2.541313 | 5.937350  |
| H                                                                                                                                                                                                       | 2.127530  | -1.052054 | -5.623997 | H                                                                                                                                                                                                        | -0.490389 | 0.401727  | 5.591571  |
| H                                                                                                                                                                                                       | 1.346649  | -2.434737 | -6.414494 | H                                                                                                                                                                                                        | 0.796716  | -0.190810 | 6.656615  |
| H                                                                                                                                                                                                       | 2.106628  | -3.437598 | -2.438135 | H                                                                                                                                                                                                        | 0.512105  | -2.754750 | 3.406542  |
| N                                                                                                                                                                                                       | 0.372492  | -1.564832 | -1.917945 | N                                                                                                                                                                                                        | 1.336627  | -0.715539 | 2.032807  |
| N                                                                                                                                                                                                       | 2.906372  | -1.861177 | -1.328838 | N                                                                                                                                                                                                        | -0.856461 | -2.146970 | 1.966345  |
| C                                                                                                                                                                                                       | 4.152955  | -1.604517 | -1.091356 | C                                                                                                                                                                                                        | -2.113402 | -2.398602 | 1.795733  |
| H                                                                                                                                                                                                       | 4.875566  | -1.875364 | -1.858603 | H                                                                                                                                                                                                        | -2.726824 | -2.536842 | 2.685761  |
| C                                                                                                                                                                                                       | -0.849160 | -1.960665 | -1.995443 | C                                                                                                                                                                                                        | 2.633985  | -0.615794 | 2.069383  |
| H                                                                                                                                                                                                       | -1.285357 | -2.148637 | -2.977398 | H                                                                                                                                                                                                        | 3.104467  | -0.149410 | 2.939114  |
| C                                                                                                                                                                                                       | 4.709315  | -1.003234 | 0.080562  | C                                                                                                                                                                                                        | -2.798266 | -2.497097 | 0.540545  |
| C                                                                                                                                                                                                       | 3.924870  | -0.829183 | 1.245273  | C                                                                                                                                                                                                        | -2.080009 | -2.653694 | -0.671242 |
| C                                                                                                                                                                                                       | 6.095667  | -0.606452 | 0.066888  | C                                                                                                                                                                                                        | -4.237487 | -2.398003 | 0.528869  |
| C                                                                                                                                                                                                       | 4.515976  | -0.343901 | 2.468461  | C                                                                                                                                                                                                        | -2.782061 | -2.844862 | -1.920548 |
| C                                                                                                                                                                                                       | 6.657335  | -0.102318 | 1.266860  | C                                                                                                                                                                                                        | -4.899532 | -2.438502 | -0.727154 |
| C                                                                                                                                                                                                       | 6.931771  | -0.645794 | -1.067051 | C                                                                                                                                                                                                        | -5.041067 | -2.190093 | 1.665707  |
| C                                                                                                                                                                                                       | 5.841636  | -0.005687 | 2.428041  | C                                                                                                                                                                                                        | -4.140982 | -2.697475 | -1.902341 |
| C                                                                                                                                                                                                       | 8.002465  | 0.310559  | 1.308932  | C                                                                                                                                                                                                        | -6.282455 | -2.217549 | -0.808953 |
| C                                                                                                                                                                                                       | 8.247206  | -0.234767 | -1.001620 | C                                                                                                                                                                                                        | -6.405355 | -1.976818 | 1.560746  |
| H                                                                                                                                                                                                       | 6.556481  | -0.985783 | -2.027867 | H                                                                                                                                                                                                        | -4.609697 | -2.183352 | 2.662116  |
| H                                                                                                                                                                                                       | 6.321818  | 0.376667  | 3.323398  | H                                                                                                                                                                                                        | -4.700419 | -2.774930 | -2.829145 |
| C                                                                                                                                                                                                       | 8.819776  | 0.251503  | 0.196253  | C                                                                                                                                                                                                        | -7.058647 | -1.965766 | 0.312007  |
| H                                                                                                                                                                                                       | 8.388132  | 0.685479  | 2.252262  | H                                                                                                                                                                                                        | -6.743313 | -2.242619 | -1.794186 |
| H                                                                                                                                                                                                       | 8.856949  | -0.283623 | -1.897866 | H                                                                                                                                                                                                        | -6.977390 | -1.816270 | 2.466488  |
| C                                                                                                                                                                                                       | -1.681187 | -2.258817 | -0.861784 | C                                                                                                                                                                                                        | 3.526329  | -1.170835 | 1.104533  |
| C                                                                                                                                                                                                       | -1.076307 | -2.655591 | 0.359514  | C                                                                                                                                                                                                        | 3.135766  | -2.347789 | 0.407638  |
| C                                                                                                                                                                                                       | -3.101331 | -2.329124 | -1.049856 | C                                                                                                                                                                                                        | 4.876960  | -0.688190 | 1.026685  |
| C                                                                                                                                                                                                       | -1.900172 | -3.269737 | 1.389036  | C                                                                                                                                                                                                        | 4.147097  | -3.201830 | -0.182863 |
| C                                                                                                                                                                                                       | -3.891223 | -2.929863 | -0.039924 | C                                                                                                                                                                                                        | 5.832496  | -1.470880 | 0.331812  |
| C                                                                                                                                                                                                       | -3.763753 | -1.795067 | -2.175088 | C                                                                                                                                                                                                        | 5.285097  | 0.550967  | 1.541036  |
| C                                                                                                                                                                                                       | -3.241376 | -3.410341 | 1.137018  | C                                                                                                                                                                                                        | 5.429297  | -2.725509 | -0.214078 |
| C                                                                                                                                                                                                       | -5.289712 | -3.009716 | -0.190622 | C                                                                                                                                                                                                        | 7.146824  | -1.005366 | 0.192269  |
| C                                                                                                                                                                                                       | -5.138062 | -1.873403 | -2.292524 | C                                                                                                                                                                                                        | 6.591536  | 0.988313  | 1.393757  |
| H                                                                                                                                                                                                       | -3.197331 | -1.292176 | -2.954515 | H                                                                                                                                                                                                        | 4.562313  | 1.212297  | 2.011771  |
| H                                                                                                                                                                                                       | -3.868915 | -3.900186 | 1.875841  | H                                                                                                                                                                                                        | 6.206993  | -3.322027 | -0.680755 |
| C                                                                                                                                                                                                       | -5.937475 | -2.482923 | -1.296023 | C                                                                                                                                                                                                        | 7.554416  | 0.215967  | 0.713840  |

|   |           |           |           |    |            |           |           |
|---|-----------|-----------|-----------|----|------------|-----------|-----------|
| H | -5.862154 | -3.497881 | 0.593946  | H  | 7.858313   | -1.627663 | -0.346425 |
| H | -5.615068 | -1.463417 | -3.177703 | H  | 6.867622   | 1.955148  | 1.795882  |
| O | 0.195796  | -2.539367 | 0.560274  | O  | 1.894510   | -2.718698 | 0.345726  |
| O | 2.657273  | -1.123919 | 1.247163  | O  | -0.777380  | -2.642215 | -0.691710 |
| F | 1.345569  | -1.115942 | -0.113478 | Fe | 0.365815   | -1.548142 | 0.382247  |
| C | -1.275318 | -3.693385 | 2.716330  | C  | 3.778538   | -4.596924 | -0.693473 |
| C | -2.294242 | -4.380178 | 3.629339  | C  | 5.011947   | -5.350261 | -1.198500 |
| H | -3.127126 | -3.719482 | 3.896336  | H  | 5.479503   | -4.848718 | -2.054247 |
| H | -2.702869 | -5.291405 | 3.177056  | H  | 5.766945   | -5.478069 | -0.414235 |
| H | -1.798755 | -4.669294 | 4.561695  | H  | 4.709339   | -6.348876 | -1.530455 |
| C | -0.119825 | -4.683092 | 2.491562  | C  | 3.181623   | -5.406714 | 0.471216  |
| H | -0.477782 | -5.582724 | 1.977487  | H  | 3.894843   | -5.475243 | 1.300782  |
| H | 0.683198  | -4.239670 | 1.902556  | H  | 2.257498   | -4.954368 | 0.837487  |
| H | 0.287135  | -4.990155 | 3.461798  | H  | 2.955938   | -6.425225 | 0.134413  |
| C | -0.769291 | -2.430606 | 3.437151  | C  | 2.767440   | -4.537589 | -1.849234 |
| H | -0.039827 | -1.884355 | 2.836293  | H  | 1.853207   | -4.015811 | -1.561871 |
| H | -1.608625 | -1.758802 | 3.658226  | H  | 3.201081   | -4.038844 | -2.722739 |
| H | -0.297967 | -2.708957 | 4.387000  | H  | 2.499190   | -5.557630 | -2.149245 |
| C | 3.675712  | -0.213013 | 3.738813  | C  | -2.021014  | -3.184482 | -3.202107 |
| C | 3.130104  | -1.592387 | 4.145576  | C  | -1.241831  | -4.494390 | -2.998421 |
| H | 2.512245  | -2.027168 | 3.357600  | H  | -0.526671  | -4.411690 | -2.177718 |
| H | 3.952331  | -2.282775 | 4.365944  | H  | -1.927692  | -5.321223 | -2.781916 |
| H | 2.518498  | -1.494897 | 5.050946  | H  | -0.690472  | -4.743467 | -3.912973 |
| C | 2.509766  | 0.764773  | 3.511168  | C  | -1.051706  | -2.054432 | -3.584295 |
| H | 1.816188  | 0.393228  | 2.756540  | H  | -0.264296  | -1.935711 | -2.839652 |
| H | 1.955665  | 0.902100  | 4.447752  | H  | -0.583667  | -2.284807 | -4.549337 |
| H | 2.882009  | 1.746744  | 3.194783  | H  | -1.587954  | -1.103443 | -3.684368 |
| C | 4.506791  | 0.322541  | 4.907376  | C  | -2.975184  | -3.386566 | -4.382155 |
| H | 4.900282  | 1.325909  | 4.706265  | H  | -3.524585  | -2.470234 | -4.629027 |
| H | 3.871650  | 0.390394  | 5.796954  | H  | -2.395416  | -3.669709 | -5.266924 |
| H | 5.346166  | -0.338355 | 5.152242  | H  | -3.698742  | -4.187371 | -4.192277 |
| C | -7.451752 | -2.529851 | -1.480011 | C  | 8.996009   | 0.685716  | 0.518301  |
| C | -7.776324 | -3.357633 | -2.739022 | C  | 9.952777   | -0.343924 | 1.150124  |
| C | -8.159027 | -3.171243 | -0.278078 | C  | 9.281939   | 0.804832  | -0.991564 |
| C | -7.985632 | -1.093081 | -1.652364 | C  | 9.254040   | 2.051631  | 1.169920  |
| H | -7.311769 | -2.920232 | -3.629810 | H  | 9.750525   | -0.439904 | 2.222837  |
| H | -7.407802 | -4.382914 | -2.622911 | H  | 9.835438   | -1.328757 | 0.684794  |
| H | -8.861828 | -3.386853 | -2.893566 | H  | 10.991338  | -0.018586 | 1.013093  |
| H | -7.969265 | -2.606357 | 0.642796  | H  | 8.603526   | 1.535163  | -1.447962 |
| H | -9.239849 | -3.173992 | -0.459240 | H  | 10.315902  | 1.135289  | -1.149758 |
| H | -7.836512 | -4.209820 | -0.137830 | H  | 9.146745   | -0.158986 | -1.494976 |
| H | -9.074927 | -1.116862 | -1.776652 | H  | 10.299136  | 2.335248  | 1.000332  |
| H | -7.744481 | -0.485133 | -0.772728 | H  | 8.615188   | 2.827623  | 0.730885  |
| H | -7.552269 | -0.614830 | -2.538330 | H  | 9.082651   | 2.012488  | 2.252390  |
| C | 10.282259 | 0.686685  | 0.204693  | C  | -8.552270  | -1.678093 | 0.164958  |
| C | 10.726751 | 1.182264  | 1.587554  | C  | -8.725354  | -0.395960 | -0.673565 |
| C | 11.164575 | -0.512991 | -0.192161 | C  | -9.235234  | -2.861529 | -0.546739 |
| C | 10.472093 | 1.832042  | -0.809109 | C  | -9.237651  | -1.466464 | 1.522373  |
| H | 10.141569 | 2.055222  | 1.901375  | H  | -8.244537  | 0.450871  | -0.167807 |
| H | 10.627224 | 0.391089  | 2.340337  | H  | -8.274555  | -0.514179 | -1.665474 |
| H | 11.781330 | 1.477559  | 1.540244  | H  | -9.791382  | -0.170359 | -0.800138 |
| H | 10.905102 | -0.882035 | -1.190726 | H  | -9.109931  | -3.778171 | 0.040266  |
| H | 12.219221 | -0.211350 | -0.198434 | H  | -10.306968 | -2.657948 | -0.661039 |
| H | 11.034373 | -1.330872 | 0.525495  | H  | -8.807498  | -3.024894 | -1.541818 |
| H | 11.522906 | 2.146505  | -0.820283 | H  | -10.302358 | -1.265570 | 1.356952  |
| H | 10.196943 | 1.514257  | -1.821052 | H  | -9.152898  | -2.360914 | 2.150971  |
| H | 9.848916  | 2.689559  | -0.530335 | H  | -8.808245  | -0.608930 | 2.054890  |
| C | -0.761025 | 2.188366  | 1.854563  | C  | -2.556083  | 1.099883  | -1.400752 |
| C | -0.656388 | 3.546629  | 1.522450  | C  | -2.377282  | 1.797388  | -2.605353 |
| C | -1.315462 | 4.499875  | 2.286389  | C  | -3.475529  | 2.353343  | -3.247727 |
| C | -2.054617 | 4.075438  | 3.392837  | C  | -4.743464  | 2.170839  | -2.690192 |
| C | -2.141185 | 2.719429  | 3.725711  | C  | -4.919569  | 1.434617  | -1.514132 |
| C | -1.498943 | 1.755452  | 2.952272  | C  | -3.820511  | 0.893686  | -0.853941 |
| C | 0.594964  | 2.297882  | -0.019807 | C  | -0.301462  | 0.954526  | -1.904928 |

|   |           |           |           |   |           |           |           |
|---|-----------|-----------|-----------|---|-----------|-----------|-----------|
| C | 0.233560  | 3.715565  | 0.321549  | C | -0.926161 | 1.762015  | -3.007891 |
| H | -1.244933 | 5.557318  | 2.044718  | H | -3.360222 | 2.899208  | -4.180626 |
| H | -2.557667 | 4.810816  | 4.015016  | H | -5.612289 | 2.585486  | -3.193946 |
| H | -2.708122 | 2.419955  | 4.601650  | H | -5.919158 | 1.262167  | -1.125920 |
| H | -1.561593 | 0.699093  | 3.193147  | H | -3.949941 | 0.283176  | 0.034385  |
| H | 1.118612  | 4.320870  | 0.559121  | H | -0.492900 | 2.769589  | -3.077860 |
| H | -0.285384 | 4.232473  | -0.496443 | H | -0.796060 | 1.296136  | -3.993586 |
| C | 0.012701  | 1.402983  | 0.879150  | C | -1.249508 | 0.615195  | -0.939339 |
| O | 0.061400  | 0.122121  | 0.892981  | O | -1.075786 | 0.021714  | 0.187332  |
| C | 1.589919  | 1.890299  | -0.946748 | C | 1.014867  | 0.435432  | -1.888011 |
| O | 1.975160  | 0.710703  | -1.093607 | O | 1.446064  | -0.337936 | -0.993695 |
| C | -2.371577 | 0.886320  | -0.618797 | C | 0.829476  | 2.393416  | 0.619575  |
| H | -1.707721 | 0.087971  | -0.292265 | H | 0.920230  | 1.375711  | 0.999767  |
| N | -3.375276 | 1.169966  | 0.123016  | N | -0.260974 | 3.030522  | 0.842752  |
| C | -4.419812 | 2.081803  | -0.208095 | C | -0.561510 | 4.359253  | 0.441829  |
| C | -4.649786 | 3.184480  | 0.603884  | C | -1.752303 | 4.582853  | -0.242524 |
| C | -5.239024 | 1.795454  | -1.300934 | C | 0.311177  | 5.413424  | 0.726080  |
| C | -5.705000 | 4.038916  | 0.304813  | C | -2.068515 | 5.864049  | -0.675095 |
| H | -3.991524 | 3.390338  | 1.443826  | H | -2.410734 | 3.751540  | -0.476377 |
| C | -6.294485 | 2.639098  | -1.589046 | C | -0.008580 | 6.689578  | 0.306393  |
| H | -5.076801 | 0.884307  | -1.870442 | H | 1.218684  | 5.237723  | 1.297435  |
| C | -6.533332 | 3.770173  | -0.793486 | C | -1.197674 | 6.927056  | -0.402356 |
| H | -5.872220 | 4.908823  | 0.929004  | H | -2.988580 | 6.020122  | -1.225689 |
| H | -6.965877 | 2.437404  | -2.416956 | H | 0.638253  | 7.532059  | 0.527002  |
| O | -7.581247 | 4.524446  | -1.159105 | O | -1.410093 | 8.198581  | -0.766930 |
| C | -7.892345 | 5.666666  | -0.384880 | C | -2.600856 | 8.510272  | -1.466195 |
| H | -7.067547 | 6.389560  | -0.392978 | H | -3.486829 | 8.268686  | -0.867061 |
| H | -8.769067 | 6.113470  | -0.853487 | H | -2.566449 | 9.584522  | -1.646086 |
| H | -8.132332 | 5.392300  | 0.649504  | H | -2.647129 | 7.981203  | -2.425611 |
| C | -2.045753 | 1.545021  | -1.922990 | C | 2.032708  | 3.025693  | -0.007331 |
| O | -1.719624 | 0.883282  | -2.880103 | O | 3.060311  | 3.084705  | 0.622691  |
| O | -2.111581 | 2.862008  | -1.858671 | O | 1.791893  | 3.467916  | -1.224321 |
| C | -1.646823 | 3.554939  | -3.026615 | C | 2.841298  | 4.194313  | -1.880231 |
| H | -1.867908 | 4.605046  | -2.844369 | H | 2.762265  | 3.942744  | -2.936656 |
| H | -0.569798 | 3.399027  | -3.133510 | H | 2.661788  | 5.260962  | -1.723826 |
| H | -2.167937 | 3.193556  | -3.914780 | H | 3.813276  | 3.910393  | -1.476231 |
| H | -3.508472 | 0.608082  | 1.014831  | H | -1.018069 | 2.492851  | 1.369972  |
| O | -3.872471 | -0.418103 | 2.252627  | O | 1.771043  | 0.826503  | -2.904747 |
| C | -5.189040 | -0.376617 | 2.864811  | C | 3.090366  | 0.242919  | -3.190253 |
| C | -5.170010 | 0.823197  | 3.795278  | C | 4.080129  | 0.641497  | -2.108176 |
| C | -6.251549 | -0.219789 | 1.783004  | C | 2.970671  | -1.265765 | -3.332179 |
| C | -5.395960 | -1.664125 | 3.650358  | C | 3.446876  | 0.881129  | -4.523518 |
| H | -4.429294 | 0.682490  | 4.588370  | H | 4.188192  | 1.728962  | -2.058248 |
| H | -4.920174 | 1.735728  | 3.244705  | H | 3.772883  | 0.267087  | -1.132550 |
| H | -6.153266 | 0.959274  | 4.255818  | H | 5.065277  | 0.220387  | -2.332767 |
| H | -6.135635 | -0.992710 | 1.016863  | H | 2.184708  | -1.523943 | -4.049723 |
| H | -7.254203 | -0.308919 | 2.214904  | H | 3.919595  | -1.666876 | -3.702973 |
| H | -6.181676 | 0.759309  | 1.298648  | H | 2.748854  | -1.740431 | -2.377500 |
| H | -6.332332 | -1.621404 | 4.215073  | H | 4.434998  | 0.539726  | -4.846162 |
| H | -5.453767 | -2.529561 | 2.980546  | H | 2.716418  | 0.609869  | -5.291833 |
| H | -4.574407 | -1.819754 | 4.356992  | H | 3.472087  | 1.972583  | -4.438699 |
| H | -3.714917 | -1.318669 | 1.914407  | O | -1.945115 | 1.534300  | 2.226397  |
| O | 2.107439  | 2.893300  | -1.653243 | C | -3.131141 | 1.953315  | 2.942885  |
| C | 3.391007  | 2.779718  | -2.354798 | C | -2.610650 | 2.561506  | 4.236565  |
| C | 4.481853  | 2.469740  | -1.339761 | C | -3.890768 | 2.991225  | 2.125591  |
| C | 3.327127  | 1.737447  | -3.463721 | C | -3.998924 | 0.736641  | 3.218145  |
| C | 3.564249  | 4.172739  | -2.940200 | H | -2.051822 | 1.817283  | 4.812714  |
| H | 4.513648  | 3.241704  | -0.564062 | H | -1.944184 | 3.405083  | 4.024912  |
| H | 4.324005  | 1.498175  | -0.867045 | H | -3.438328 | 2.928912  | 4.850597  |
| H | 5.456872  | 2.445175  | -1.837086 | H | -4.200530 | 2.582331  | 1.158569  |
| H | 2.414461  | 1.861229  | -4.057275 | H | -4.788965 | 3.314545  | 2.661834  |
| H | 4.185871  | 1.870324  | -4.130481 | H | -3.270538 | 3.876498  | 1.948711  |
| H | 3.353395  | 0.726944  | -3.056001 | H | -4.879372 | 1.019845  | 3.803538  |
| H | 4.524722  | 4.242854  | -3.459192 | H | -4.355082 | 0.269667  | 2.293718  |

|                                                                                                                                                                                                     |           |           |           |                                                                                                                                                                                                      |           |           |           |
|-----------------------------------------------------------------------------------------------------------------------------------------------------------------------------------------------------|-----------|-----------|-----------|------------------------------------------------------------------------------------------------------------------------------------------------------------------------------------------------------|-----------|-----------|-----------|
| H                                                                                                                                                                                                   | 2.766305  | 4.395606  | -3.656352 | H                                                                                                                                                                                                    | -3.438640 | -0.010478 | 3.787976  |
| H                                                                                                                                                                                                   | 3.541810  | 4.927123  | -2.148089 | H                                                                                                                                                                                                    | -2.096299 | 0.811134  | 1.579967  |
| 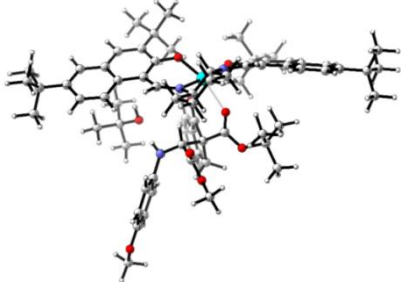 <p>INT 5<sup>SR</sup></p> <p>E(UPBE1PBE) = -4901.224388<br/>Thermal correction to Gibbs Free Energy= 1.418839</p> |           |           |           |  <p>INT 5<sup>RS</sup></p> <p>E(UPBE1PBE) = -4901.220753<br/>Thermal correction to Gibbs Free Energy= 1.421043</p> |           |           |           |
| C                                                                                                                                                                                                   | 0.357370  | 0.086156  | 4.482577  | C                                                                                                                                                                                                    | 1.006204  | 0.473939  | 4.287889  |
| C                                                                                                                                                                                                   | -0.412107 | -0.189154 | 3.192896  | C                                                                                                                                                                                                    | 0.377725  | -0.200663 | 3.070328  |
| C                                                                                                                                                                                                   | -1.628807 | -1.122549 | 3.439578  | C                                                                                                                                                                                                    | -0.332213 | -1.532438 | 3.450667  |
| C                                                                                                                                                                                                   | -2.552746 | -0.512842 | 4.499532  | C                                                                                                                                                                                                    | -1.378538 | -1.281328 | 4.536274  |
| C                                                                                                                                                                                                   | -1.769586 | -0.223784 | 5.791086  | C                                                                                                                                                                                                    | -0.727050 | -0.611855 | 5.757349  |
| C                                                                                                                                                                                                   | -0.590540 | 0.716741  | 5.512214  | C                                                                                                                                                                                                    | -0.075215 | 0.717159  | 5.351447  |
| H                                                                                                                                                                                                   | -0.800502 | 0.765188  | 2.811512  | H                                                                                                                                                                                                    | -0.402104 | 0.459147  | 2.658468  |
| H                                                                                                                                                                                                   | 0.764781  | -0.851498 | 4.887878  | H                                                                                                                                                                                                    | 1.789889  | -0.173143 | 4.708161  |
| H                                                                                                                                                                                                   | 1.183925  | 0.775350  | 4.269167  | H                                                                                                                                                                                                    | 1.459632  | 1.426202  | 3.982557  |
| H                                                                                                                                                                                                   | -2.970483 | 0.427329  | 4.109124  | H                                                                                                                                                                                                    | -2.146310 | -0.608599 | 4.134682  |
| H                                                                                                                                                                                                   | -3.382378 | -1.195610 | 4.723425  | H                                                                                                                                                                                                    | -1.853806 | -2.224998 | 4.835209  |
| H                                                                                                                                                                                                   | -2.444264 | 0.217930  | 6.533647  | H                                                                                                                                                                                                    | -1.487833 | -0.444277 | 6.528917  |
| H                                                                                                                                                                                                   | -1.391777 | -1.168791 | 6.205999  | H                                                                                                                                                                                                    | 0.036082  | -1.279417 | 6.181213  |
| H                                                                                                                                                                                                   | -0.962106 | 1.672816  | 5.117858  | H                                                                                                                                                                                                    | -0.841549 | 1.390121  | 4.940579  |
| H                                                                                                                                                                                                   | -0.044117 | 0.926292  | 6.438866  | H                                                                                                                                                                                                    | 0.368784  | 1.208142  | 6.224780  |
| H                                                                                                                                                                                                   | -1.232698 | -2.084307 | 3.802832  | H                                                                                                                                                                                                    | 0.441900  | -2.220537 | 3.823381  |
| N                                                                                                                                                                                                   | 0.336915  | -0.821735 | 2.111379  | N                                                                                                                                                                                                    | 1.293489  | -0.577052 | 1.997364  |
| N                                                                                                                                                                                                   | -2.223144 | -1.345149 | 2.115263  | N                                                                                                                                                                                                    | -0.833489 | -2.063002 | 2.177094  |
| C                                                                                                                                                                                                   | -3.502211 | -1.258823 | 1.932959  | C                                                                                                                                                                                                    | -2.083565 | -2.347382 | 2.008008  |
| H                                                                                                                                                                                                   | -4.119236 | -1.092754 | 2.813489  | H                                                                                                                                                                                                    | -2.728986 | -2.287035 | 2.881565  |
| C                                                                                                                                                                                                   | 1.571867  | -1.189867 | 2.241575  | C                                                                                                                                                                                                    | 2.570792  | -0.360714 | 2.048135  |
| H                                                                                                                                                                                                   | 2.112251  | -0.872604 | 3.134064  | H                                                                                                                                                                                                    | 2.957497  | 0.309805  | 2.816165  |
| C                                                                                                                                                                                                   | -4.214191 | -1.339030 | 0.694814  | C                                                                                                                                                                                                    | -2.732692 | -2.669737 | 0.771817  |
| C                                                                                                                                                                                                   | -3.567815 | -1.759207 | -0.492149 | C                                                                                                                                                                                                    | -1.985741 | -2.986745 | -0.385988 |
| C                                                                                                                                                                                                   | -5.605598 | -0.960718 | 0.671687  | C                                                                                                                                                                                                    | -4.163867 | -2.507592 | 0.697982  |
| C                                                                                                                                                                                                   | -4.302767 | -1.914349 | -1.721580 | C                                                                                                                                                                                                    | -2.652767 | -3.282938 | -1.631749 |
| C                                                                                                                                                                                                   | -6.307479 | -1.074785 | -0.555375 | C                                                                                                                                                                                                    | -4.785968 | -2.647340 | -0.571771 |
| C                                                                                                                                                                                                   | -6.310727 | -0.422051 | 1.767144  | C                                                                                                                                                                                                    | -4.988856 | -2.127648 | 1.773377  |
| C                                                                                                                                                                                                   | -5.628569 | -1.570804 | -1.701274 | C                                                                                                                                                                                                    | -4.005435 | -3.081552 | -1.678607 |
| C                                                                                                                                                                                                   | -7.653409 | -0.671657 | -0.650888 | C                                                                                                                                                                                                    | -6.143016 | -2.326405 | -0.736434 |
| C                                                                                                                                                                                                   | -7.628685 | -0.032068 | 1.648808  | C                                                                                                                                                                                                    | -6.324061 | -1.814608 | 1.586869  |
| H                                                                                                                                                                                                   | -5.831448 | -0.284856 | 2.731680  | H                                                                                                                                                                                                    | -4.600001 | -2.072872 | 2.785409  |
| H                                                                                                                                                                                                   | -6.215023 | -1.653573 | -2.610909 | H                                                                                                                                                                                                    | -4.535735 | -3.232042 | -2.613427 |
| C                                                                                                                                                                                                   | -8.336543 | -0.147177 | 0.429419  | C                                                                                                                                                                                                    | -6.926812 | -1.873302 | 0.313024  |
| H                                                                                                                                                                                                   | -8.148811 | -0.779219 | -1.611236 | H                                                                                                                                                                                                    | -6.573475 | -2.428657 | -1.730490 |
| H                                                                                                                                                                                                   | -8.133529 | 0.377826  | 2.517506  | H                                                                                                                                                                                                    | -6.912648 | -1.515666 | 2.445693  |
| C                                                                                                                                                                                                   | 2.286981  | -2.036344 | 1.336989  | C                                                                                                                                                                                                    | 3.540232  | -0.996072 | 1.209425  |
| C                                                                                                                                                                                                   | 1.577688  | -2.919705 | 0.480817  | C                                                                                                                                                                                                    | 3.262600  | -2.273493 | 0.656721  |
| C                                                                                                                                                                                                   | 3.719099  | -2.124184 | 1.461002  | C                                                                                                                                                                                                    | 4.849245  | -0.416456 | 1.091757  |
| C                                                                                                                                                                                                   | 2.285767  | -3.938971 | -0.261351 | C                                                                                                                                                                                                    | 4.335293  | -3.083665 | 0.125196  |
| C                                                                                                                                                                                                   | 4.390537  | -3.165672 | 0.773959  | C                                                                                                                                                                                                    | 5.877554  | -1.190837 | 0.496662  |
| C                                                                                                                                                                                                   | 4.501320  | -1.221886 | 2.207969  | C                                                                                                                                                                                                    | 5.155991  | 0.897097  | 1.484888  |
| C                                                                                                                                                                                                   | 3.637211  | -4.035526 | -0.065142 | C                                                                                                                                                                                                    | 5.580435  | -2.515549 | 0.066174  |
| C                                                                                                                                                                                                   | 5.787201  | -3.303352 | 0.885577  | C                                                                                                                                                                                                    | 7.157656  | -0.642529 | 0.326137  |
| C                                                                                                                                                                                                   | 5.867636  | -1.383406 | 2.310308  | C                                                                                                                                                                                                    | 6.429459  | 1.413468  | 1.308022  |
| H                                                                                                                                                                                                   | 4.043520  | -0.362576 | 2.690142  | H                                                                                                                                                                                                    | 4.386665  | 1.545952  | 1.893886  |
| H                                                                                                                                                                                                   | 4.197906  | -4.801024 | -0.592259 | H                                                                                                                                                                                                    | 6.406142  | -3.085675 | -0.347606 |
| C                                                                                                                                                                                                   | 6.545411  | -2.437612 | 1.654275  | C                                                                                                                                                                                                    | 7.462350  | 0.652200  | 0.721741  |
| H                                                                                                                                                                                                   | 6.265104  | -4.113543 | 0.343034  | H                                                                                                                                                                                                    | 7.924638  | -1.261823 | -0.134117 |



|    |            |           |           |    |            |           |           |
|----|------------|-----------|-----------|----|------------|-----------|-----------|
| H  | 6.438156   | -0.669148 | 2.893849  | H  | 6.627674   | 2.429700  | 1.626860  |
| O  | 0.281390   | -2.873338 | 0.388407  | O  | 2.053921   | -2.767339 | 0.663224  |
| O  | -2.291914  | -2.026569 | -0.499016 | O  | -0.679140  | -2.998267 | -0.356307 |
| Fe | -0.864522  | -1.368187 | 0.531398  | Fe | 0.445054   | -1.783106 | 0.567407  |
| C  | 1.541288   | -4.836276 | -1.249507 | C  | 4.066311   | -4.512314 | -0.349063 |
| C  | 2.487561   | -5.832009 | -1.925269 | C  | 5.351077   | -5.196631 | -0.823123 |
| H  | 3.280977   | -5.330033 | -2.491669 | H  | 5.799870   | -4.684600 | -1.682519 |
| H  | 2.951157   | -6.513873 | -1.203031 | H  | 6.100072   | -5.261480 | -0.025667 |
| H  | 1.917093   | -6.442768 | -2.632647 | H  | 5.116142   | -6.218615 | -1.137908 |
| C  | 0.444307   | -5.645510 | -0.538202 | C  | 3.497179   | -5.345583 | 0.811816  |
| H  | 0.876879   | -6.269336 | 0.252305  | H  | 4.199626   | -5.365138 | 1.652828  |
| H  | -0.312451  | -4.997331 | -0.094305 | H  | 2.542849   | -4.948325 | 1.162419  |
| H  | -0.046480  | -6.308857 | -1.260069 | H  | 3.339512   | -6.378492 | 0.480455  |
| C  | 0.923645   | -3.960182 | -2.353490 | C  | 3.080309   | -4.509290 | -1.528644 |
| H  | 0.227892   | -3.224998 | -1.945941 | H  | 2.124528   | -4.056727 | -1.257404 |
| H  | 1.712528   | -3.429501 | -2.901198 | H  | 3.501620   | -3.963360 | -2.380717 |
| H  | 0.380734   | -4.591762 | -3.066520 | H  | 2.890405   | -5.539236 | -1.852905 |
| C  | -3.606872  | -2.417542 | -2.986546 | C  | -1.859917  | -3.721165 | -2.861223 |
| C  | -3.029829  | -3.822098 | -2.742700 | C  | -1.029111  | -4.973168 | -2.536006 |
| H  | -2.303049  | -3.823555 | -1.928187 | H  | -0.321768  | -4.788838 | -1.725631 |
| H  | -3.829828  | -4.529845 | -2.498090 | H  | -1.682449  | -5.803395 | -2.245415 |
| H  | -2.530524  | -4.178849 | -3.651668 | H  | -0.466088  | -5.283030 | -3.424190 |
| C  | -2.481981  | -1.450131 | -3.394867 | C  | -0.938440  | -2.578088 | -3.316612 |
| H  | -1.692013  | -1.416141 | -2.643795 | H  | -0.205342  | -2.331127 | -2.547654 |
| H  | -2.039333  | -1.778462 | -4.342929 | H  | -0.398233  | -2.877904 | -4.222471 |
| H  | -2.875526  | -0.436598 | -3.542307 | H  | -1.523273  | -1.679984 | -3.552287 |
| C  | -4.583190  | -2.511648 | -4.162019 | C  | -2.782665  | -4.067227 | -4.033243 |
| H  | -5.002616  | -1.534675 | -4.429902 | H  | -3.349743  | -3.198030 | -4.386586 |
| H  | -4.050944  | -2.892155 | -5.040055 | H  | -2.176620  | -4.423493 | -4.872751 |
| H  | -5.409764  | -3.200904 | -3.955485 | H  | -3.489327  | -4.863782 | -3.774491 |
| C  | 8.060483   | -2.551941 | 1.792809  | C  | 8.870406   | 1.206707  | 0.507805  |
| C  | 8.409363   | -2.763313 | 3.279229  | C  | 9.877165   | 0.330344  | 1.278161  |
| C  | 8.623906   | -3.729441 | 0.985522  | C  | 9.198745   | 1.178201  | -0.997645 |
| C  | 8.715622   | -1.252769 | 1.283526  | C  | 9.005198   | 2.652849  | 1.006151  |
| H  | 8.050450   | -1.928681 | 3.891745  | H  | 9.646844   | 0.341794  | 2.349439  |
| H  | 7.952278   | -3.688465 | 3.647967  | H  | 9.846978   | -0.706868 | 0.926763  |
| H  | 9.497454   | -2.834889 | 3.396527  | H  | 10.893183  | 0.716300  | 1.130661  |
| H  | 8.418425   | -3.609546 | -0.085289 | H  | 8.485281   | 1.798277  | -1.553046 |
| H  | 9.710708   | -3.767615 | 1.121547  | H  | 10.209895  | 1.569266  | -1.163748 |
| H  | 8.204370   | -4.682443 | 1.329781  | H  | 9.155192   | 0.156681  | -1.391460 |
| H  | 9.805456   | -1.328096 | 1.379579  | H  | 10.031107  | 2.995224  | 0.828968  |
| H  | 8.465155   | -1.089035 | 0.229226  | H  | 8.325071   | 3.324287  | 0.467674  |
| H  | 8.379186   | -0.383852 | 1.859760  | H  | 8.804791   | 2.722762  | 2.082003  |
| C  | -9.789747  | 0.311843  | 0.360960  | C  | -8.370022  | -1.440014 | 0.064268  |
| C  | -10.389536 | 0.116794  | -1.038129 | C  | -8.356799  | -0.257052 | -0.925775 |
| C  | -10.621958 | -0.504460 | 1.369000  | C  | -9.166111  | -2.614224 | -0.535318 |
| C  | -9.858638  | 1.809648  | 0.718376  | C  | -9.066772  | -0.983745 | 1.353901  |
| H  | -9.842820  | 0.700866  | -1.788500 | H  | -7.781635  | 0.578486  | -0.507398 |
| H  | -10.380925 | -0.940968 | -1.327276 | H  | -7.905386  | -0.552942 | -1.880207 |
| H  | -11.430430 | 0.459581  | -1.031331 | H  | -9.382308  | 0.081094  | -1.117878 |
| H  | -10.247991 | -0.372816 | 2.390301  | H  | -9.172048  | -3.461184 | 0.159631  |
| H  | -11.667382 | -0.174126 | 1.339051  | H  | -10.201183 | -2.303762 | -0.722635 |
| H  | -10.580652 | -1.570290 | 1.118014  | H  | -8.729454  | -2.945343 | -1.484062 |
| H  | -10.900363 | 2.150827  | 0.684295  | H  | -10.091057 | -0.675619 | 1.115262  |
| H  | -9.469219  | 1.994634  | 1.725741  | H  | -9.118967  | -1.798848 | 2.085568  |
| H  | -9.271612  | 2.396195  | 0.001944  | H  | -8.549469  | -0.127264 | 1.803894  |
| C  | 0.777482   | 0.793306  | -2.975168 | C  | -2.215594  | 1.059933  | -1.715849 |
| C  | 0.735777   | 2.172844  | -3.203320 | C  | -1.763445  | 2.104037  | -2.532351 |
| C  | 1.125342   | 2.667791  | -4.444301 | C  | -2.675682  | 2.764995  | -3.348687 |
| C  | 1.516711   | 1.761744  | -5.427277 | C  | -4.008188  | 2.360175  | -3.322070 |
| C  | 1.531009   | 0.376449  | -5.194434 | C  | -4.449717  | 1.310004  | -2.499511 |
| C  | 1.166871   | -0.124128 | -3.956323 | C  | -3.551831  | 0.644020  | -1.683776 |
| C  | 0.027882   | 1.839437  | -0.931346 | C  | 0.148479   | 1.358891  | -1.271796 |
| C  | 0.223810   | 2.919715  | -2.005577 | C  | -0.291550  | 2.357140  | -2.358478 |

|   |           |           |           |   |           |           |           |
|---|-----------|-----------|-----------|---|-----------|-----------|-----------|
| H | 1.111777  | 3.734024  | -4.651625 | H | -2.362423 | 3.588341  | -3.983641 |
| H | 1.814268  | 2.134677  | -6.403444 | H | -4.728969 | 2.871890  | -3.954074 |
| H | 1.837915  | -0.296690 | -5.988840 | H | -5.496863 | 1.022384  | -2.502020 |
| H | 1.179495  | -1.186061 | -3.732902 | H | -3.863977 | -0.174415 | -1.042198 |
| H | -0.718882 | 3.427317  | -2.228783 | H | -0.097012 | 3.390090  | -2.059244 |
| H | 0.925005  | 3.687667  | -1.670056 | H | 0.254659  | 2.188337  | -3.289696 |
| C | 0.352321  | 0.520587  | -1.625882 | C | -1.111508 | 0.558051  | -0.937406 |
| O | 0.264227  | -0.593997 | -1.103773 | O | -1.144869 | -0.316627 | -0.073696 |
| C | -1.353250 | 1.709450  | -0.335298 | C | 1.208164  | 0.359834  | -1.699238 |
| O | -1.685779 | 0.705002  | 0.292492  | O | 1.429688  | -0.667748 | -1.052702 |
| C | 1.034508  | 1.976430  | 0.316910  | C | 0.533597  | 1.979548  | 0.135577  |
| H | 0.913930  | 1.036712  | 0.861827  | H | 0.635908  | 1.112128  | 0.790849  |
| N | 2.399279  | 2.157078  | -0.035219 | N | -0.472740 | 2.808913  | 0.732557  |
| C | 3.069319  | 3.399588  | -0.075987 | C | -0.820086 | 4.070291  | 0.200506  |
| C | 3.501689  | 3.959857  | -1.277917 | C | -2.108672 | 4.320587  | -0.272224 |
| C | 3.366421  | 4.078850  | 1.114736  | C | 0.109334  | 5.120854  | 0.172873  |
| C | 4.208315  | 5.161671  | -1.306966 | C | -2.469903 | 5.567765  | -0.779124 |
| H | 3.277047  | 3.450965  | -2.211601 | H | -2.840341 | 3.517629  | -0.269052 |
| C | 4.032142  | 5.291708  | 1.096743  | C | -0.229230 | 6.351475  | -0.362875 |
| H | 3.075809  | 3.633643  | 2.062714  | H | 1.093279  | 4.980395  | 0.608771  |
| C | 4.465961  | 5.842951  | -0.115993 | C | -1.522097 | 6.589674  | -0.845199 |
| H | 4.537018  | 5.559675  | -2.260599 | H | -3.483861 | 5.718826  | -1.132548 |
| H | 4.262873  | 5.821703  | 2.015718  | H | 0.487584  | 7.166251  | -0.388292 |
| O | 5.122828  | 7.020392  | -0.026272 | O | -1.750903 | 7.827601  | -1.340421 |
| C | 5.605924  | 7.596659  | -1.218450 | C | -3.049542 | 8.118239  | -1.801389 |
| H | 4.787567  | 7.835127  | -1.910475 | H | -3.793006 | 8.019059  | -0.999566 |
| H | 6.108625  | 8.518989  | -0.925205 | H | -3.024556 | 9.153775  | -2.142799 |
| H | 6.324421  | 6.936262  | -1.721042 | H | -3.334496 | 7.468292  | -2.639844 |
| C | 0.545380  | 3.060305  | 1.271010  | C | 1.910079  | 2.625857  | 0.212928  |
| O | 0.382029  | 2.881218  | 2.457370  | O | 2.460362  | 2.839498  | 1.267952  |
| O | 0.309184  | 4.210963  | 0.650067  | O | 2.438996  | 2.894024  | -0.978600 |
| C | -0.043982 | 5.310945  | 1.489766  | C | 3.748994  | 3.473400  | -0.951076 |
| H | -0.258098 | 6.137261  | 0.813662  | H | 4.026221  | 3.613085  | -1.995294 |
| H | -0.918551 | 5.065541  | 2.096807  | H | 3.722113  | 4.433420  | -0.429938 |
| H | 0.796127  | 5.559757  | 2.142561  | H | 4.449612  | 2.803997  | -0.445570 |
| H | 2.817863  | 1.390338  | -0.568654 | H | -1.262925 | 2.276873  | 1.096673  |
| O | 3.440806  | -0.177893 | -1.351490 | O | 1.838560  | 0.694057  | -2.785730 |
| C | 4.690590  | -0.285143 | -2.060375 | C | 2.970181  | -0.072560 | -3.368496 |
| C | 4.704552  | 0.867569  | -3.050885 | C | 4.091676  | -0.178747 | -2.351860 |
| C | 5.846525  | -0.157402 | -1.076600 | C | 2.465949  | -1.426096 | -3.834013 |
| C | 4.720759  | -1.626622 | -2.784845 | C | 3.368389  | 0.805209  | -4.542759 |
| H | 3.805327  | 0.853351  | -3.673608 | H | 4.361350  | 0.805618  | -1.959185 |
| H | 4.755192  | 1.824801  | -2.523407 | H | 3.825229  | -0.831039 | -1.521510 |
| H | 5.579759  | 0.794659  | -3.704112 | H | 4.975450  | -0.598326 | -2.842388 |
| H | 5.850085  | -0.973931 | -0.348736 | H | 1.611567  | -1.309345 | -4.507835 |
| H | 6.806257  | -0.176793 | -1.604986 | H | 3.266015  | -1.931230 | -4.384875 |
| H | 5.774866  | 0.789316  | -0.530336 | H | 2.177127  | -2.059213 | -2.994284 |
| H | 5.652437  | -1.748913 | -3.347413 | H | 4.210600  | 0.349401  | -5.071144 |
| H | 4.645420  | -2.452256 | -2.068825 | H | 2.538163  | 0.917098  | -5.246903 |
| H | 3.880420  | -1.698560 | -3.483423 | H | 3.672033  | 1.798400  | -4.197734 |
| H | 3.447266  | -0.840076 | -0.641701 | O | -2.684864 | 1.183497  | 1.983973  |
| O | -2.104352 | 2.765722  | -0.488557 | C | -3.846996 | 1.815484  | 2.558466  |
| C | -3.492334 | 2.854166  | 0.036871  | C | -3.386583 | 3.206671  | 2.964416  |
| C | -4.367467 | 1.945037  | -0.807185 | C | -4.962465 | 1.864664  | 1.519447  |
| C | -3.533812 | 2.513015  | 1.519766  | C | -4.301932 | 1.038010  | 3.789557  |
| C | -3.821525 | 4.319641  | -0.190418 | H | -2.516320 | 3.133420  | 3.625688  |
| H | -4.341837 | 2.254042  | -1.857004 | H | -3.106311 | 3.807606  | 2.094821  |
| H | -4.048020 | 0.904343  | -0.731618 | H | -4.183445 | 3.730474  | 3.501045  |
| H | -5.402364 | 1.999353  | -0.454988 | H | -5.292424 | 0.852224  | 1.252473  |
| H | -2.754165 | 3.055287  | 2.066415  | H | -5.831936 | 2.404222  | 1.909757  |
| H | -4.506533 | 2.820968  | 1.916349  | H | -4.624484 | 2.372676  | 0.610639  |
| H | -3.410806 | 1.444527  | 1.693794  | H | -5.191193 | 1.499975  | 4.231359  |
| H | -4.856676 | 4.512339  | 0.105851  | H | -4.559655 | 0.007418  | 3.525202  |
| H | -3.164536 | 4.963880  | 0.402552  | H | -3.514533 | 1.023977  | 4.549660  |

|   |           |          |           |   |           |          |          |
|---|-----------|----------|-----------|---|-----------|----------|----------|
| H | -3.709438 | 4.582812 | -1.246476 | H | -2.956198 | 0.364214 | 1.542735 |
|---|-----------|----------|-----------|---|-----------|----------|----------|

## 10. References

- 1 B. Sun, J. Yang, L. Zhang, R. Shi, X. Zhang, T. Xu, X. Zhuang, R. Zhu, C. Yu, C. Jin, *Asian J. Org. Chem.* **2019**, *8*, 2058-2064.
- 2 Y.-N. Duan, Z. Zhang, C. Zhang, *Org. Lett.* **2016**, *18*, 6176-6179.
- 3 L. Zhao, G. Huang, B. Guo, L. Xu, J. Chen, W. Cao, G. Zhao, X. Wu, *Org. Lett.* **2014**, *16*, 5584-5587.
- 4 S. Shaw, J. D. White, *J. Am. Chem. Soc.* **2014**, *136*, 13578-13581.
- 5 a) D. Chen, R. Luo, M. Li, M. Wen, Y. Li, C. Chen, N. Zhang, *Chem. Commun.* **2017**, *53*, 10930-10933; b) D. D Ford, L. P. C. Nielsen, S. J. Zuend, C. B Musgrave, E. N Jacobsen, *J. Am. Chem. Soc.* **2013**, *135*, 15595-15608.
- 6 G. Zhang, Y. Zhang, R. Wang, *Angew. Chem. Int. Ed.* **2011**, *50*, 10429-10432.
- 7 O. V. Dolomanov, L. J. Bourhis, R. J. Gildea, J. A. K. Howard, H. Puschmann, *J. Appl. Cryst.* **2009**, *42*, 339-341.
- 8 G. M. Sheldrick, *Acta Cryst.* **2015**, *A71*, 3-8.
- 9 G. M. Sheldrick, *Acta Cryst.* **2015**, *C71*, 3-8.
- 10 K.-Y. Xiang, P. Ying, T. Ying, W.-K. Su, J.-B. Yu, *Green Chem.* **2023**, *25*, 2853-2862.
- 11 M. J. Frisch, G. W. Trucks, H. B. Schlegel, G. E. Scuseria, M. A. Robb, J. R. Cheeseman, G. Scalmani, V. Barone, G. A. Petersson, H. Nakatsuji, X. Li, M. Caricato, A. V. Marenich, J. Bloino, B. G. Janesko, R. Gomperts, B. Mennucci, H. P. Hratchian, J. V. Ortiz, A. F. Izmaylov, J. L. Sonnenberg, D. Williams-Young, F. Ding, F. Lipparini, F. Egidi, J. Goings, B. Peng, A. Petrone, T. Henderson, D. Ranasinghe, V. G. Zakrzewski, J. Gao, N. Rega, G. Zheng, W. Liang, M. Hada, M. Ehara, K. Toyota, R. Fukuda, J. Hasegawa, M. Ishida, T. Nakajima, Y. Honda, O. Kitao, H. Nakai, T. Vreven, K. Throssell, J. A. Montgomery, Jr., J. E. Peralta, F. Ogliaro, M. J. Bearpark, J. J. Heyd, E. N. Brothers, K. N. Kudin, V. N. Staroverov, T. A. Keith, R. Kobayashi, J. Normand, K. Raghavachari, A. P. Rendell, J. C. Burant, S. S. Iyengar, J. Tomasi, M. Cossi, J. M. Millam, M. Klene, C. Adamo, R. Cammi, J. W. Ochterski, R. L. Martin, K. Morokuma, O. Farkas, J. B. Foresman, D. J. Fox, *Gaussian 16*, Wallingford, CT, 2016.
- 12 C. Adamo, V. Barone, *J. Chem. Phys.* **1999**, *110*, 6158-6170.
- 13 S. Grimme, J. Antony, S. Ehrlich, H. Krieg, *J. Chem. Phys.* **2010**, *132*, 154104.
- 14 F. Weigend, R. Ahlrichs, *Phys. Chem. Chem. Phys.* **2005**, *7*, 3297.
- 15 P. C. Hariharan, J. Pople, *Theoret. Chim. Acta.* **1973**, *28*, 213-222.
- 16 W. J. Hehre, R. Ditchfield, J. A. Pople, *J. Chem. Phys.* **1972**, *56*, 2257-2261.
- 17 J. S. Binkley, J. A. Pople, W. J. Hehre, *J. Am. Chem. Soc.* **1980**, *102*, 939-947.
- 18 T. Clark, J. Chandrasekhar, G. W. Spitznagel, P. V. R. Schleyer, *J. Comput. Chem.* **1983**, *4*, 294-301.
- 19 R. Krishnan, J. S. Binkley, R. Seeger, J. A. Pople, *J. Chem. Phys.* **1980**, *72*, 650-654.
- 20 Legault, C. Y. CYLview, 1.0b; Université de Sherbrooke, **2009** (<http://www.cylview.org>).
